# Supplementary material
Source: PubMed Central journal article supplement (PMC6402560)
Supplement: NIHMS997264-supplement-Figures.pdf [file NIHMS997264-supplement-Figures.pdf]

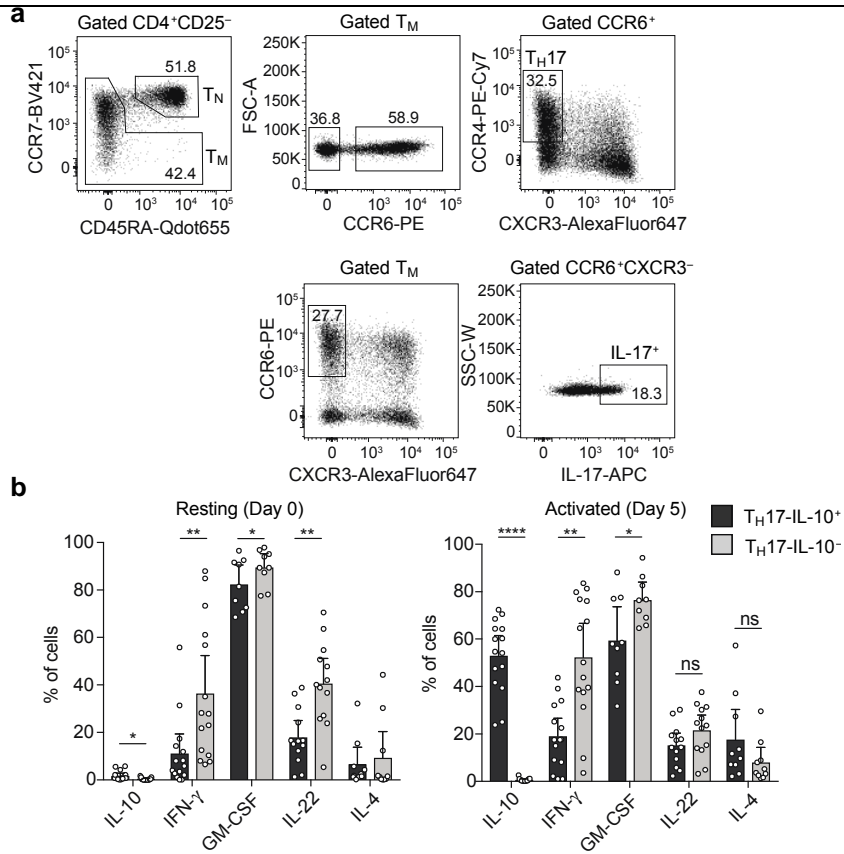

### Supplementary Figure 1

#### Sorting strategy and cytokine production by subsets of human memory T<sub>H</sub>17 cells

**a.** Sorting of human memory T<sub>H</sub>17 cells from PBMCs based on chemokine receptor expression or cytokine secretion. MACS-enriched CD4<sup>+</sup> T cells were stained with antibodies to CD45RA, CD25, CCR7, CCR6, CCR4 and CXCR3. CD4<sup>+</sup> memory T<sub>H</sub>17 cells were sorted, after exclusion of CD45RA<sup>+</sup>CCR7<sup>+</sup> naïve T cells (T<sub>N</sub>) and CD8<sup>+</sup> CD14<sup>+</sup> CD19<sup>+</sup> CD56<sup>+</sup> CD25<sup>+</sup> cells, as CCR6<sup>+</sup>CCR4<sup>+</sup>CXCR3<sup>-</sup> or, alternatively, as CCR6<sup>+</sup>CXCR3<sup>-</sup>IL-17A<sup>+</sup> (a, lower panels). Dot plots from one donor, representative of more than 10 donors analyzed. **b.** Cytokine production as assessed by intracellular staining in Day 0-resting and Day 5-activated T<sub>H</sub>17-IL10<sup>+</sup> and T<sub>H</sub>17-IL-10<sup>-</sup> clone pools after 5 h stimulation with PMA plus Ionomycin. Data are represented as mean + 95% c.i., with each dot indicating a T cell clone pool from independent experiments (n ≥ 9) (note: the number of clone pools is paired and the same in T<sub>H</sub>17-IL-10<sup>+</sup> and T<sub>H</sub>17-IL-10<sup>-</sup>, but can vary for different cytokines (IL-10 and IFN- $\gamma$ , n = 15; IL-22, n = 13; IL-4, n = 10; GM-CSF, n = 9)). \*P < 0.05; \*\*P < 0.01; \*\*\*\*P < 0.0001, as determined by ratio paired *t* test.

**a**

## Protein-coding genes - GO Biological Process

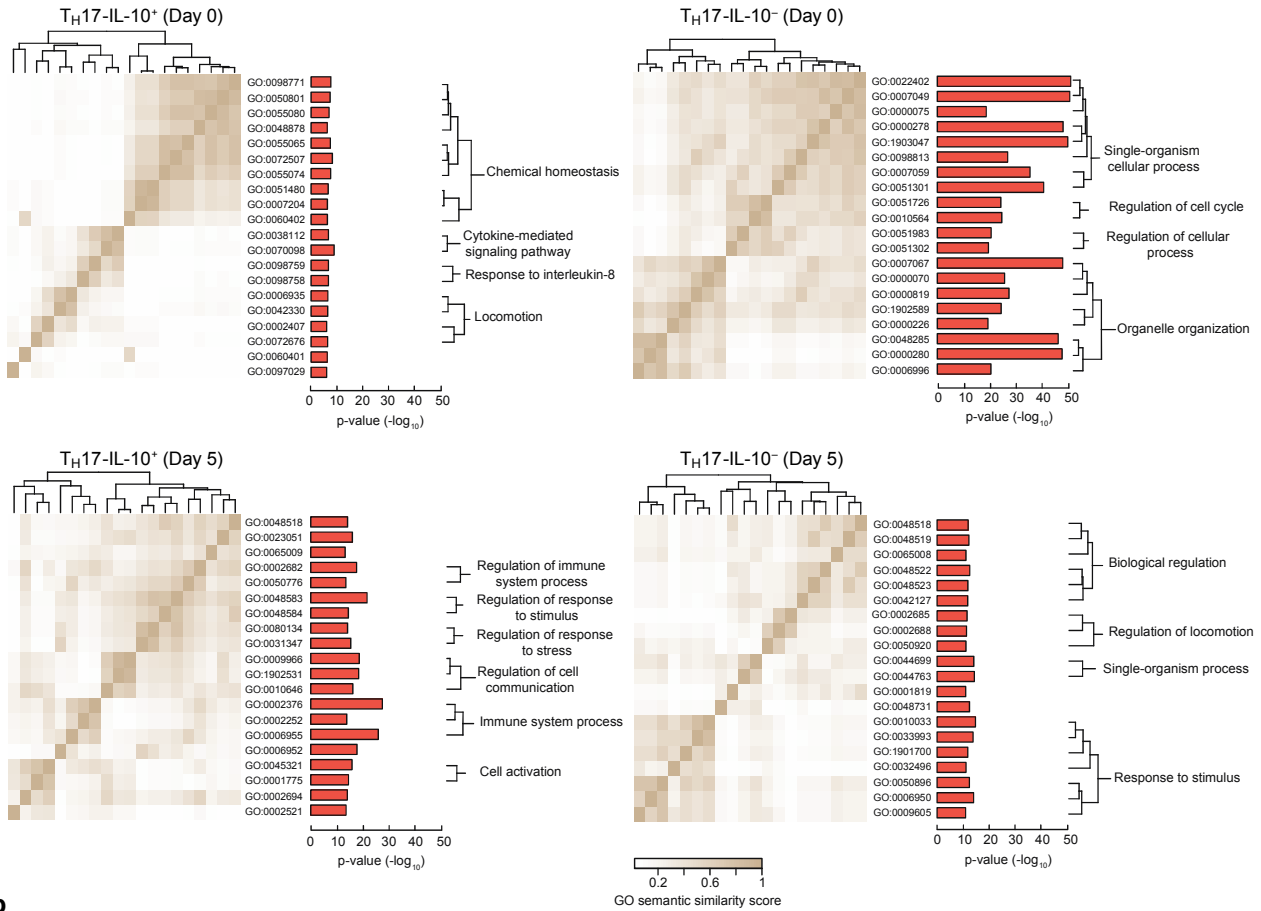**b**

## lncRNAs - GO Biological Process

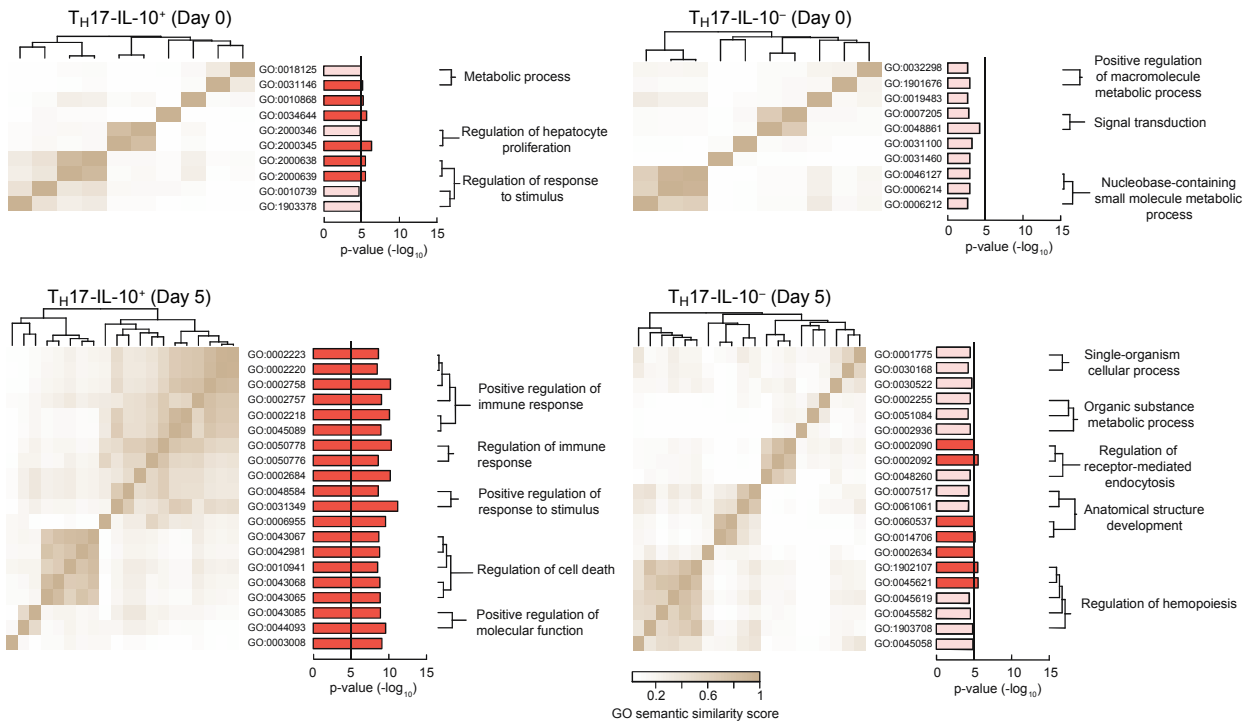

**Supplementary Figure 2**

Gene ontology (GO) analyses of differentially expressed genes and lncRNAs in T<sub>H</sub>17-IL-10<sup>+</sup> and T<sub>H</sub>17-IL-10<sup>-</sup> cells

Gene ontology (GO) analyses on the biological processes associated to the differentially expressed protein-coding genes (a) or lncRNAs (b) in Day 0-resting and Day 5-activated T<sub>H</sub>17-IL-10<sup>+</sup> and T<sub>H</sub>17-IL-10<sup>-</sup> cells. GO terms are clustered by semantic similarity and a synthetic description is shown. *P*-value as determined by MetaCore based on hypergeometric distribution; *P*-value threshold (vertical line) set at  $1 \times 10^{-5}$ .

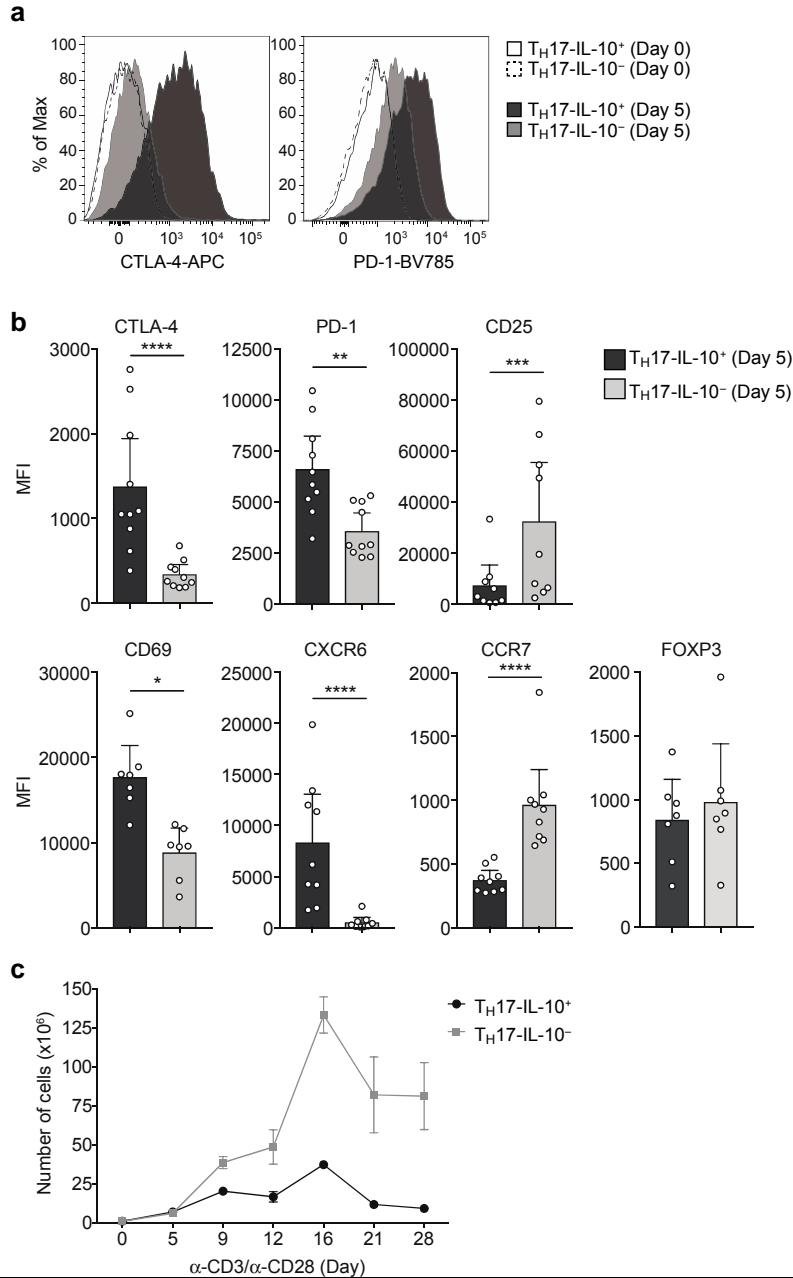

### Supplementary Figure 3

Differential surface marker expression in TH<sub>H</sub>17-IL-10<sup>+</sup> and TH<sub>H</sub>17-IL-10<sup>-</sup> cells

**a,b.** Expression of CTLA4, PD-1, CD25, CD69, CXCR6, CCR7 and FOXP3 as assessed by flow cytometry in Day 5-activated TH<sub>H</sub>17-IL-10<sup>+</sup> and TH<sub>H</sub>17-IL-10<sup>-</sup> clone pools. Shown are representative histogram plots (**a**) and cumulative data of clone pools from independent experiments (mean + 95% c.i.; CTLA-4 and PD-1, n = 10; CD25, CXCR6 and CCR7, n = 9; CD69 and FOXP3, n = 7) (**b**). \**P* < 0.05; \*\**P* < 0.01; \*\*\**P* < 0.001; \*\*\*\**P* < 0.0001, as determined by ratio paired *t* test. **c.** Expansion of TH<sub>H</sub>17-IL-10<sup>+</sup> and TH<sub>H</sub>17-IL-10<sup>-</sup> cells in response to stimulation with CD3/CD28 antibodies. TH<sub>H</sub>17-IL-10<sup>+</sup> and TH<sub>H</sub>17-IL-10<sup>-</sup> cells were stimulated with plate-bound CD3/CD28 antibodies for 48 h and their proliferation was measured at the indicated time points. Shown is the average of two independent experiments (mean ± s.e.m.).

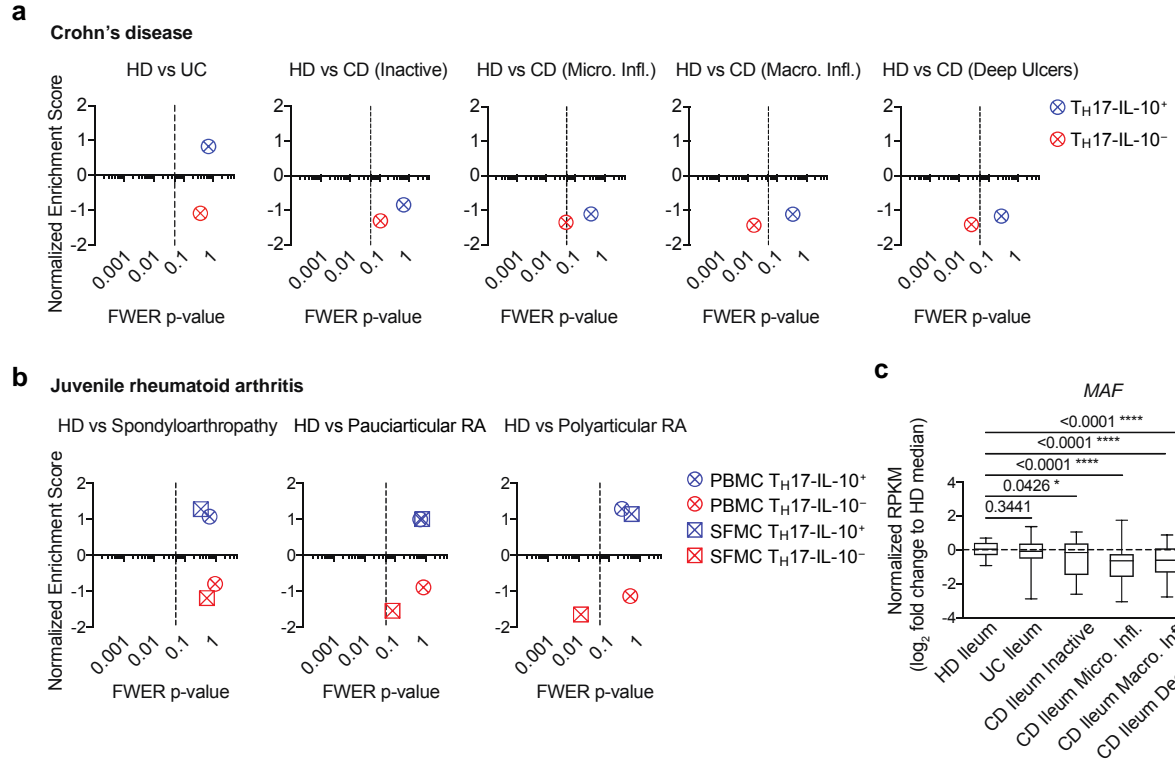

#### Supplementary Figure 4

Gene set enrichment analysis (GSEA) of  $T_H17-IL-10^+$  and  $T_H17-IL-10^-$  transcriptional signatures in autoimmune diseases

Enrichment of  $T_H17-IL-10^+$  and  $T_H17-IL-10^-$ -associated gene signatures in publicly available transcriptional datasets of  $T_H17$ -mediated autoimmune diseases. Gene set enrichment in ileal biopsies from healthy donors (HD) vs. Crohn's patients (CD) (**a**) and in PBMC and SFMC from healthy donors (HD) vs. juvenile rheumatoid arthritis patients (RA) (**b**) are shown. GSEA enrichment results were reported as normalized enrichment score and familywise enrichment (FWER)  $P$  value. FWER  $P$  values smaller than 0.05 (dashed line) were considered significant. **c.** c-MAF expression in ileal biopsies from healthy donors (HD), ulcerative colitis (UC) and Crohn's disease (CD) patients, with histologically graded disease severity, is shown in a box (interquartiles, with a line indicating the median value) and whiskers (min to max values) plot.  $P$ -value as determined by Kruskal-Wallis test. Micro. Infl. = microscopic inflammation; Macro. Infl. = macroscopic inflammation.

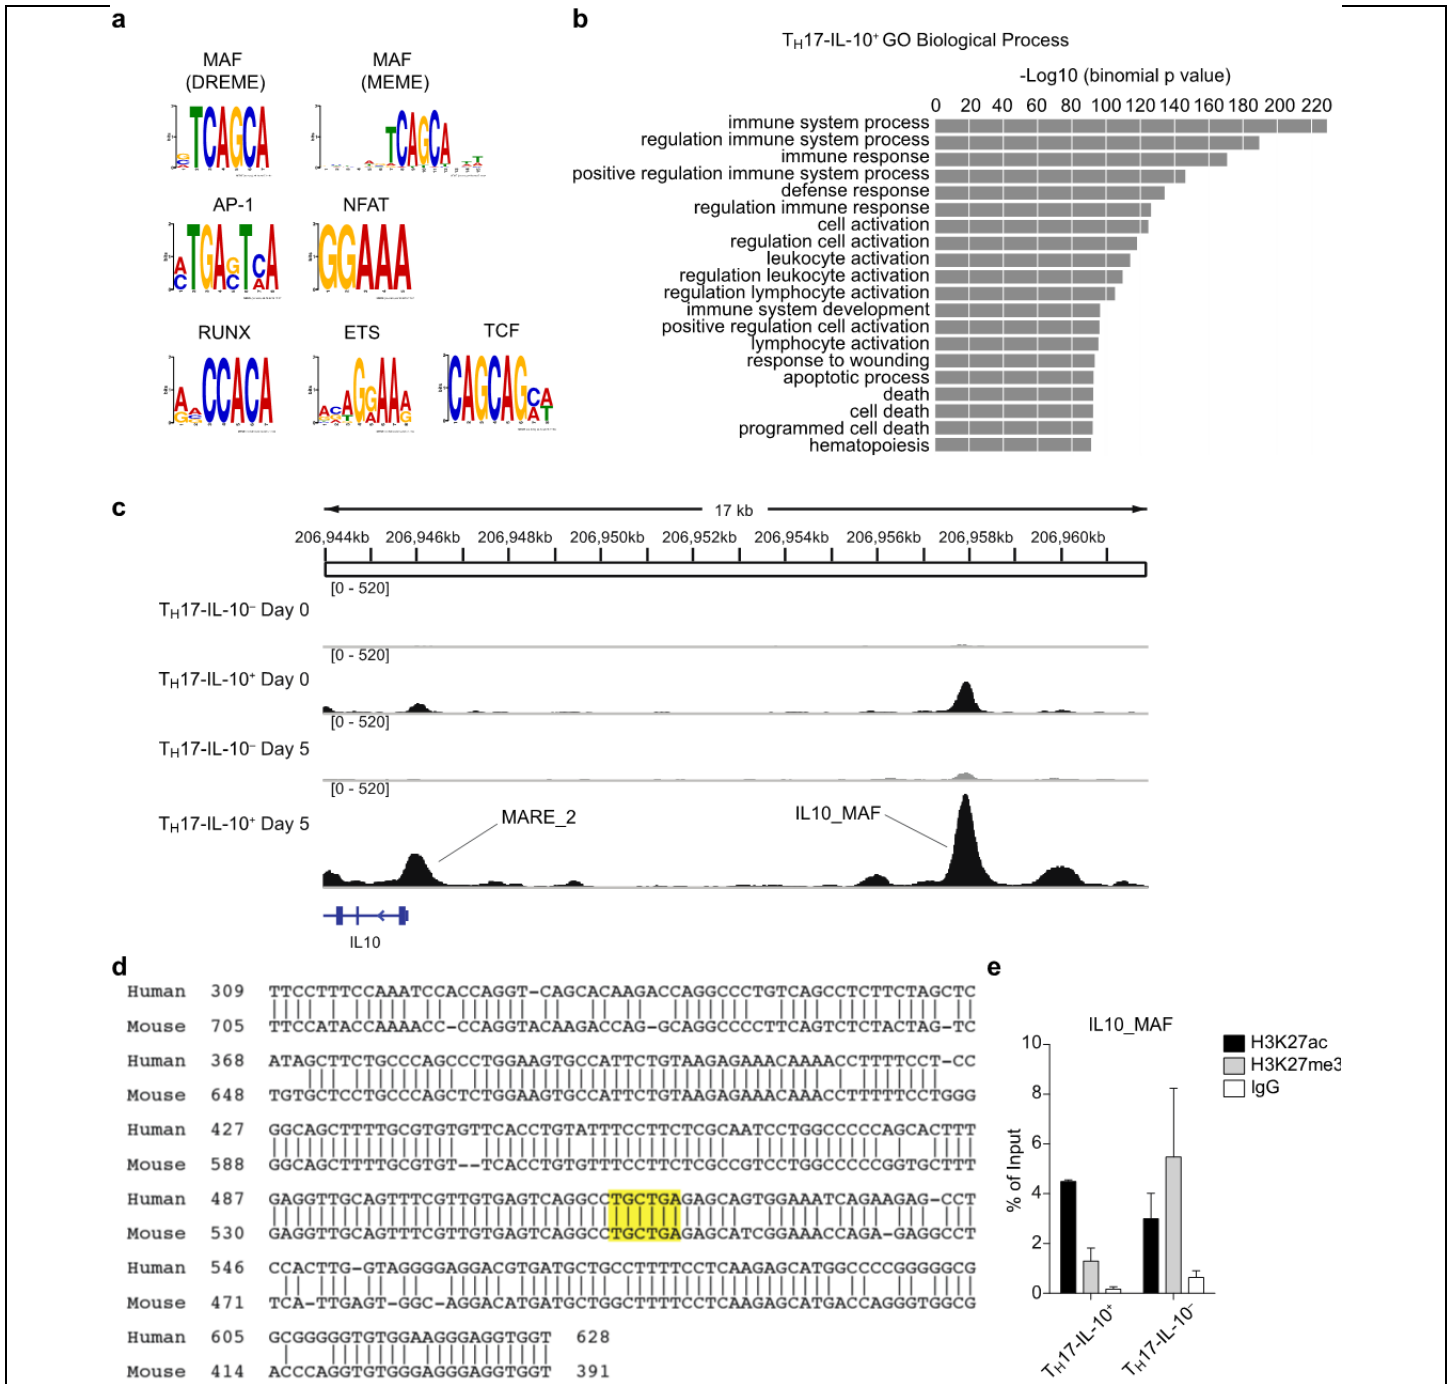

### Supplementary Figure 5

c-MAF binds enhancer-like regions in proximity to genes involved in the immune response

**a.** Position weight matrix (PWM) of the top ranked DNA motifs identified by the MEME suite software in the Day 5-activated T<sub>H</sub>17-IL-10<sup>+</sup> c-MAF ChIP-seq dataset; e-values: MAF (DREME),  $5.5 \times 10^{-212}$ ; MAF (MEME),  $6.6 \times 10^{-175}$ ; AP-1,  $1.7 \times 10^{-146}$ ; NFAT,  $3.9 \times 10^{-145}$ ; RUNX,  $2.6 \times 10^{-81}$ ; ETS,  $1.1 \times 10^{-57}$ ; TCF,  $1.1 \times 10^{-20}$ . **b.** Gene Ontology (GO) analysis of genes associated to c-MAF-bound regions in Day 5-activated T<sub>H</sub>17-IL-10<sup>+</sup> cells. GO biological processes are ranked according to their binomial *P*-value. **c.** Graphical representation of a previously characterized (MARE\_2) and a novel (IL10\_MAF) c-MAF binding sites at the *IL10* locus by the Integrative Genome Viewer (IGV). **d.** The 1 kb genomic region centered on the novel putative *IL10* enhancer (IL10\_MAF) was aligned to an isometric genomic region centered on a c-MAF peak localized about 9 kb upstream of *IL10* in mouse T<sub>H</sub>17 cells<sup>1</sup>. The core enhancer region

shown is highly conserved between human and mouse (83% identities) and includes a canonical c-MAF binding site (highlighted in yellow). **e.** The activation status of the newly identified putative *IL10* enhancer was evaluated by quantifying H3K27ac and H3K27me3 levels in Day 5-activated T<sub>H</sub>17-IL-10<sup>+</sup> and T<sub>H</sub>17-IL-10<sup>-</sup> cells by ChIP-qPCR (mean + s.e.m.; n=2).

<sup>1</sup>Ciofani, M. et al. A validated regulatory network for Th17 cell specification. *Cell* 151, 289-303 (2012).

**a**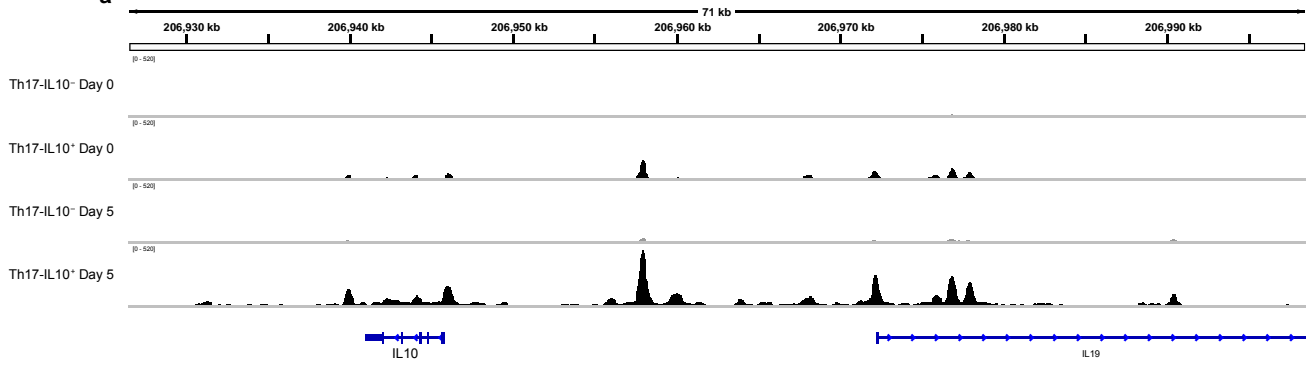**b**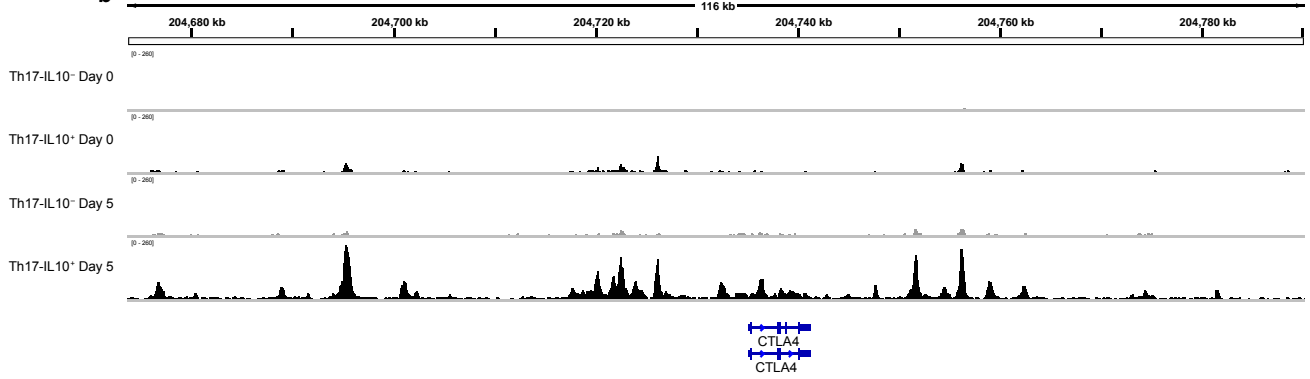**c**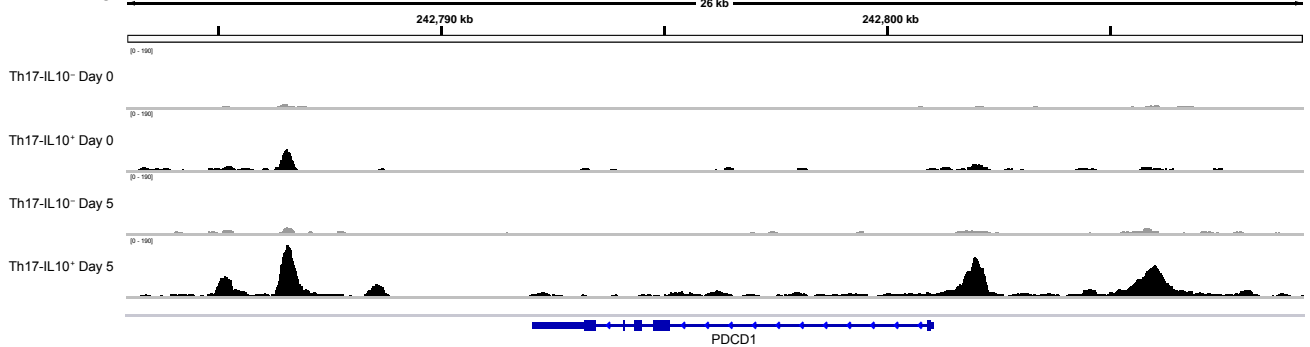**d**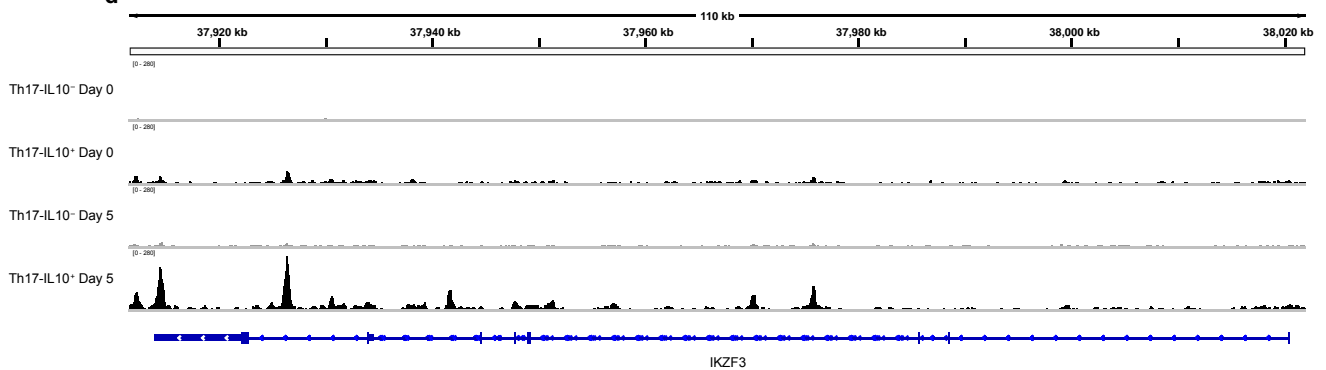**e**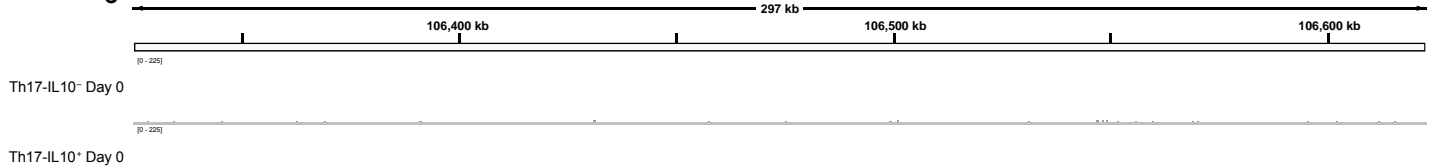





**Supplementary Figure 6**

Examples of c-MAF binding to immunoregulatory and tissue-residency genes loci

**a-g.** Graphical representation of c-MAF binding profiles at the locus of the indicated genes using the Integrative Genome Viewer (IGV).

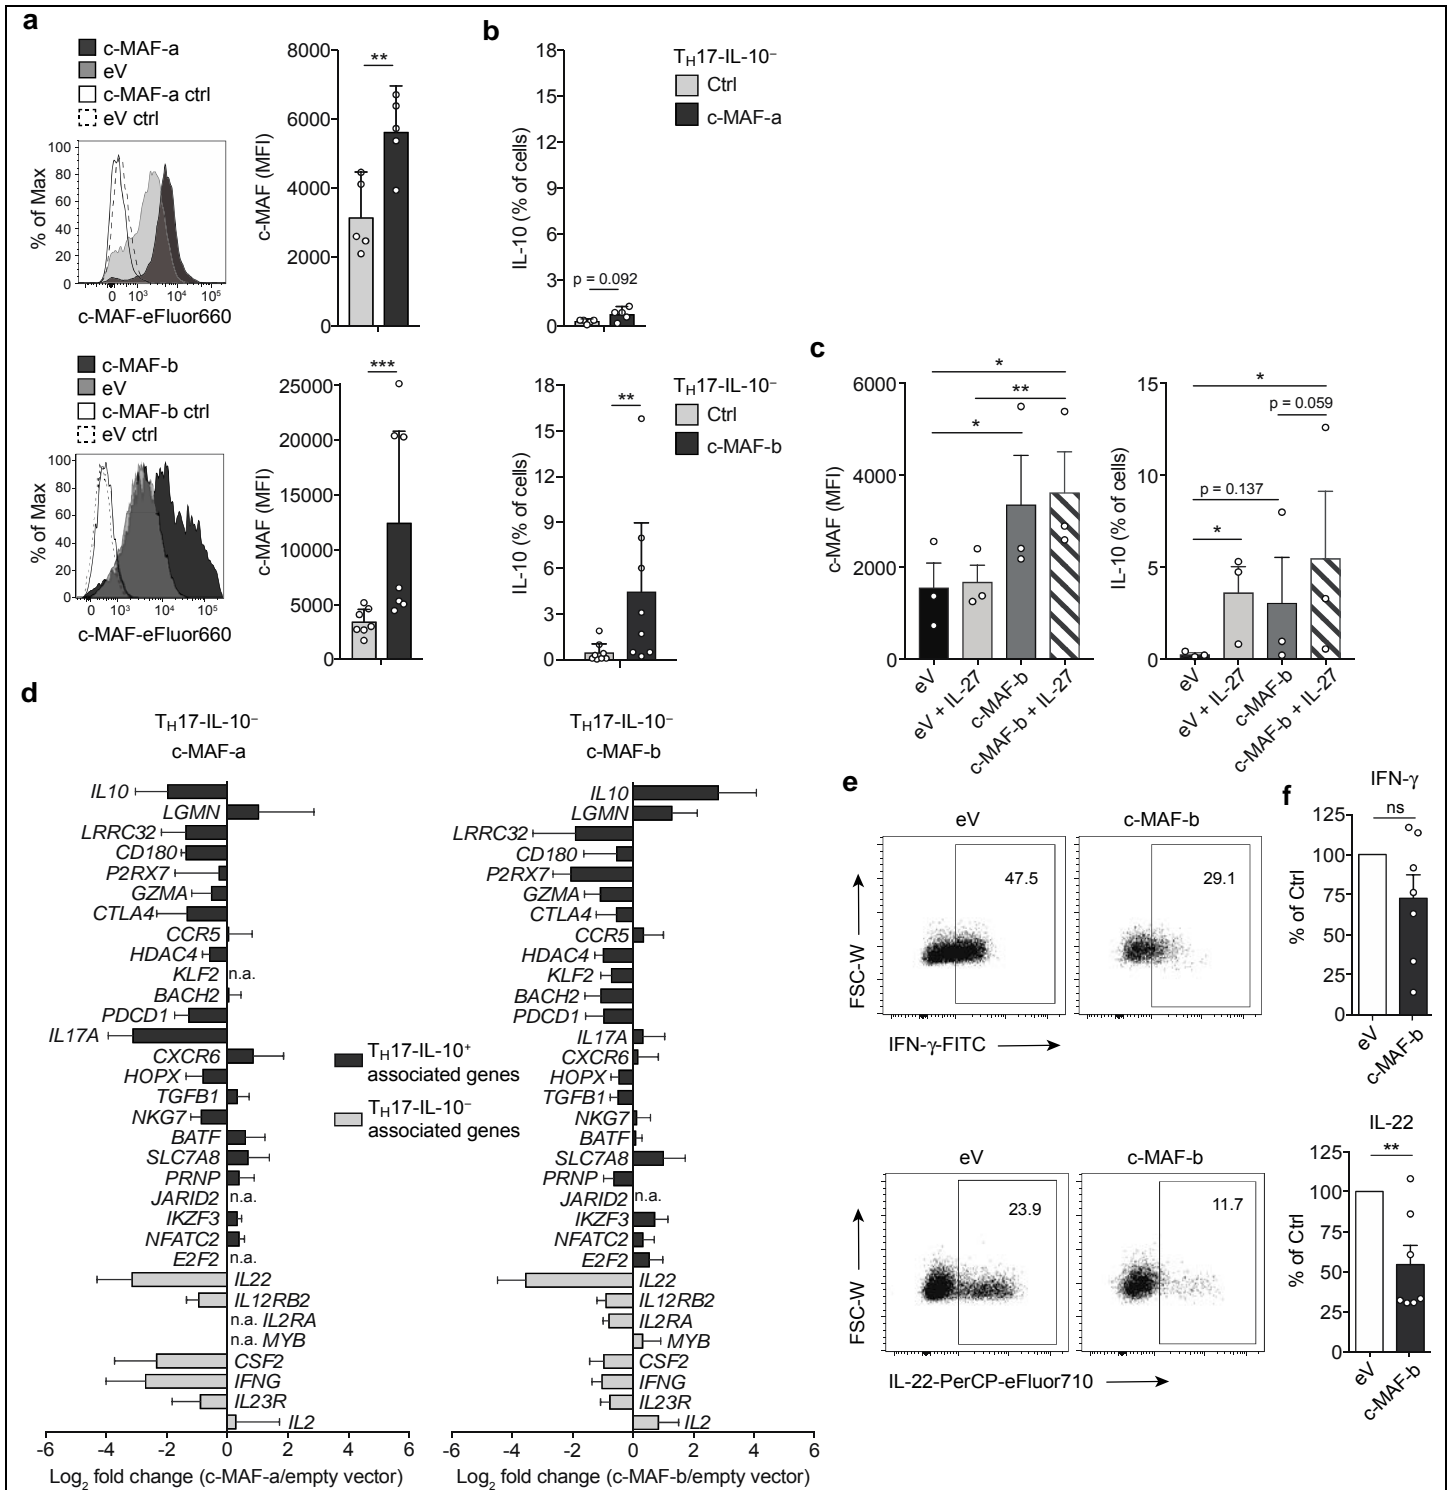

c.i. (isoform a: n = 5, isoform b: n = 7). **c.** Expression of c-MAF and IL-10 in T<sub>H</sub>17-IL10<sup>-</sup> cells upon ectopic expression of c-MAF isoform b. Control (empty vector) cells and c-MAF-b (c-MAF isoform b) expressing T<sub>H</sub>17-IL10<sup>-</sup> cells were polyclonally stimulated with or without IL-27 (25 ng/ml) and c-MAF and IL-10 expression was measured in Day 5-activated cells by flow cytometry, after 5 h stimulation with PMA+I (mean + s.e.m.; n = 3). **d.** Expression of c-MAF-dependent genes in T<sub>H</sub>17-IL10<sup>-</sup> cells upon ectopic expression of MAF isoform a (left panel, n = 4) and b (right panel, n = 6), as measured by qPCR. Black bars indicate T<sub>H</sub>17-IL10<sup>+</sup>-associated genes, grey bars indicate T<sub>H</sub>17-IL10<sup>-</sup>-associated genes. Shown is the average log<sub>2</sub> fold change over empty vector (mean + s.e.m). n.a., not assessed. **e,f.** Representative dot plots (**e**) and cumulative data of expression of IFN- $\gamma$  and IL-22 (**f**) as assessed by intracellular staining of Day 5-activated T<sub>H</sub>17-IL10<sup>-</sup> cells following ectopic expression of MAF isoform b or control empty vector (eV). Data are expressed as percentage over empty vector and represent the mean + s.e.m. (n = 7), with each dot indicating a T cell clone pool from independent experiments. \*\**P* < 0.01; \*\*\**P* < 0.001, as determined by ratio paired *t* test (**a-c**) and paired *t* test (**f**).

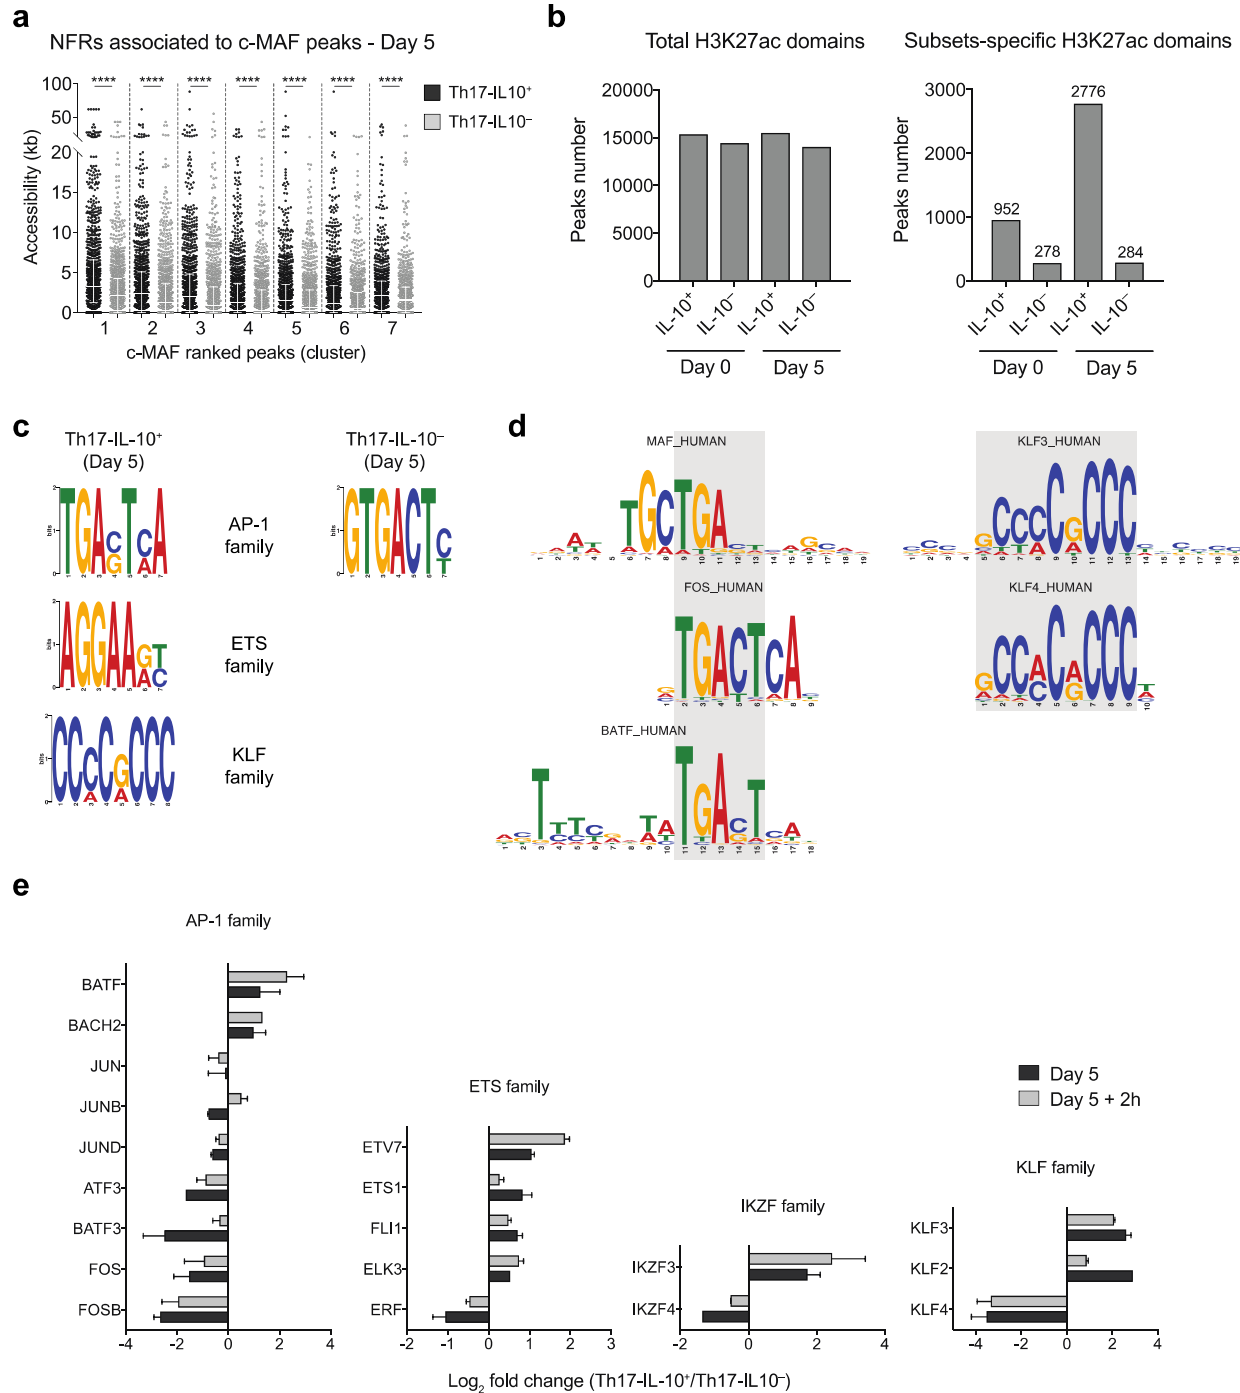

### Supplementary Figure 8

Potential cooperative and antagonistic binding of transcription factors in T<sub>H</sub>17-IL-10<sup>+</sup> and T<sub>H</sub>17-IL-10<sup>-</sup> cells

**a.** c-MAF peaks from Day 5-activated T<sub>H</sub>17-IL-10<sup>+</sup> cells were ranked according to the fold enrichment over the input, corrected for *P*-value, and clustered in bins of 1000 peaks (cluster 7 is made of 778 peaks). c-MAF peaks-associated nucleosome-free regions (NFRs) in the same cells were identified from H3K27ac ChIP-seq data and their size was compared to the corresponding NFRs in Day 5-activated T<sub>H</sub>17-IL-10<sup>-</sup> cells. If a NFR was not detected, the size was reported as 0. Each dot in (a) represents a NFR and the white lines indicate median and interquartile ranges. *P*-values are obtained by Wilcoxon matched-pairs signed rank test. **b.** Number of total H3K27ac peaks (left panel) identified in Day 0 and Day 5 T<sub>H</sub>17-IL-10<sup>+</sup> and T<sub>H</sub>17-IL-10<sup>-</sup> cells, as assessed by ChIP-seq (MACS *P*-value

$\leq 10 \times 10^{-10}$ , FDR  $\leq 5\%$  and fold enrichment  $\geq 5$ ). Subset-specific H3K27ac peaks (right panel) were identified, among the total ones, as H3K27ac peaks that were specifically enriched (MACS  $P$ -value  $\leq 10 \times 10^{-6}$  and fold enrichment  $\geq 3$ ) in the indicated population. Multiple H3K27ac peaks residing within 1 kb were collapsed into a single domain. **c.** Position weight matrices (PWMs) of DNA enriched motives identified in NFRs associated to recently-activated  $T_H17$ -IL-10<sup>+</sup>-specific and  $T_H17$ -IL-10<sup>-</sup>-specific H3K27ac domains. **d.** Consensus PWMs of the indicated transcription factors were downloaded from the Hocomoco v.11 database<sup>2</sup>. Overlapping nucleotides in consensus motifs are highlighted by a light grey box in background **e.** Gene expression profile of the indicated transcription factors in Day 5-activated  $T_H17$ -IL-10<sup>+</sup> and  $T_H17$ -IL-10<sup>-</sup> cells was obtained from RNA-seq data (Fig. 4).

<sup>2</sup>Kulakovskiy, I.V. et al. HOCOMOCO: towards a complete collection of transcription factor binding models for human and mouse via large-scale ChIP-Seq analysis. *Nucleic Acids Res* 46, D252-D259 (2018).
