# Supplementary material
Source: PubMed Central journal article supplement (PMC6402560)
Supplement: NIHMS997264-supplement-Table.pdf [file NIHMS997264-supplement-Table.pdf]

**Supplementary Table 1**

| <b>T<sub>H</sub>17-IL-10<sup>+</sup> associated genes</b> |                                                                                                                                                                                                                                                                                                                                                                                                                                                                                                                                                                                  |
|-----------------------------------------------------------|----------------------------------------------------------------------------------------------------------------------------------------------------------------------------------------------------------------------------------------------------------------------------------------------------------------------------------------------------------------------------------------------------------------------------------------------------------------------------------------------------------------------------------------------------------------------------------|
| <b>Gene</b>                                               | <b>Description</b>                                                                                                                                                                                                                                                                                                                                                                                                                                                                                                                                                               |
| <i>IL10</i>                                               | IL-10 is a cytokine with pleiotropic effects in immunoregulation and possesses anti-inflammatory properties. IL-10 production is associated with many immune cells (DCs, macrophages, mast cells, NK cells, eosinophils, neutrophils, T cells); (Saraiva and O'Garra, 2010).                                                                                                                                                                                                                                                                                                     |
| <i>PTGDS</i>                                              | PTGDS is a glutathione-independent prostaglandin D synthase that catalyzes the conversion of prostaglandin H2 (PGH2) to prostaglandin D2 (PGD2). CDDO-trifluoroethyl-amide treatment of mice during EAE led to decreased symptoms and higher expression of PTGDS in T cells recovered from treated mice (Pareek et al., 2011).                                                                                                                                                                                                                                                   |
| <i>LRRC32</i>                                             | LRRC32/GARP is a transmembrane protein that has been described to be present on stimulated human T <sub>reg</sub> cells, but not on other T <sub>H</sub> cells (Gauthy et al., 2013). CD25 <sup>+</sup> T cells sorted for high GARP expression displayed more potent suppressive activity compared to CD25 <sup>+</sup> GARP <sup>-</sup> cells (Wang et al., 2009). Retroviral overexpression of GARP in antigen-specific T <sub>H</sub> cells leads to an efficient and stable re-programming of an effector T cell towards a regulatory T cell (Probst-Kepper et al., 2009). |
| <i>SLC7A8</i>                                             | Solute carrier family 7 (amino acid transporter light chain, L system), member 8 (Pineda et al., 1999).                                                                                                                                                                                                                                                                                                                                                                                                                                                                          |
| <i>CXCR6</i>                                              | CXCR6 is the receptor for CXCL16. Membrane bound chemokine CXCL16 expressed on follicle-associated epithelium and M cells was demonstrated to mediate lympho-epithelial interaction in GALT (Hase et al., 2006). CXCR6 expression has been associated with the recruitment of T cells to the liver and tumor tissue (Oldham et al., 2012; Parsonage et al., 2012).                                                                                                                                                                                                               |
| <i>CD180</i>                                              | CD180/RP105 regulates antigen-presenting cell function and T <sub>reg</sub> development, leading to the attenuation of cell-mediated immune responses (Tada et al., 2008). B cells from lupus patients lacking CD180 are responsible for the production of immunoglobulins and autoantibodies (Kikuchi et al., 2002).                                                                                                                                                                                                                                                            |
| <i>CCR9</i>                                               | CCR9 is the receptor for CCL25. It is important for the migration of lymphocytes to the small intestine (Papadakis et al., 2000; Kunkel et al., 2000) and to discrete compartments of the thymus (Wurbel et al., 2000)                                                                                                                                                                                                                                                                                                                                                           |
| <i>CTLA4</i>                                              | CTLA-4 is an inhibitory co-receptor expressed on activated T <sub>H</sub> cells and is constitutively expressed by T <sub>reg</sub> cells (Chen and Flies, 2013; Rudd et al., 2009).                                                                                                                                                                                                                                                                                                                                                                                             |
| <i>CCR5</i>                                               | CCR5 is the receptor for chemokines CCL3, CCL4, CCL5, CCL8 and CCL14 and is involved in T cell trafficking. CCR5 further serves as co-receptor for HIV entry (Oppermann, 2004). CCR5 is required to retain a CD4 <sup>+</sup> tissue resident population in the genital mucosa of HSV-2 infected mice (Iijima et al. 2014).                                                                                                                                                                                                                                                      |
| <i>IKZF3</i>                                              | The transcription factor Aiolos has been shown to be involved in driving IL-10 expression while suppressing IL-2 production in human T <sub>H</sub> 17 cells (Evans et al., 2014).                                                                                                                                                                                                                                                                                                                                                                                               |
| <i>P2RX7</i>                                              | The product of this gene belongs to the family of purinoceptors for ATP. This receptor functions as a ligand-gated ion channel. P2RX7 receptor signaling has been shown to influence the T <sub>H</sub> 17-T <sub>reg</sub> balance (Schenk et al., 2011).                                                                                                                                                                                                                                                                                                                       |
| <i>GZMA</i>                                               | Granzyme A is an effector molecule mediating cytotoxicity of CD8 <sup>+</sup> T cells together with granzyme B and perforin. Granzyme A was also found to be expressed by CD4 <sup>+</sup> T cells, including human T <sub>reg</sub> cells (Grossman et al., 2004).                                                                                                                                                                                                                                                                                                              |
| <i>CCR1</i>                                               | CCR1 is the receptor for CCL3, CCL5, CCL7 and CCL23 and is critical for the recruitment of immune cells. CCR1 and CCR5 are required to retain a CD4 <sup>+</sup> tissue resident population in the genital mucosa of HSV-2 infected mice (Iijima et al. 2014).                                                                                                                                                                                                                                                                                                                   |
| <i>NKG7</i>                                               | Natural killer cell granule protein 7 was found to be expressed by NK cells as well as T cells. NKG7 was further identified to be highly expressed in T <sub>reg</sub> cells (Sugimoto et al., 2006).                                                                                                                                                                                                                                                                                                                                                                            |
| <i>PDCDI</i>                                              | PD-1 is an inhibitory co-receptor expressed on activated T cells (Chen and Flies, 2013).                                                                                                                                                                                                                                                                                                                                                                                                                                                                                         |
| <i>IL17A</i>                                              | IL-17A represents the signature cytokine of T <sub>H</sub> 17 cells and acts as an inflammatory mediator during immune responses. Excessive production of IL-17A is associated with a variety of chronic inflammatory diseases and autoimmunity (Song and Qian, 2013).                                                                                                                                                                                                                                                                                                           |
| <i>HDAC4</i>                                              | Histone deacetylase 4 belongs to the class II of the histone deacetylase. It possesses histone deacetylase activity and represses transcription when tethered to a promoter (Bertos et al., 2001). HDAC4 overexpression in T cells inhibited the TCR-dependent activation of an IL-2 reporter gene (Pan et al., 2004).                                                                                                                                                                                                                                                           |
| <i>PRNP</i>                                               | Prion protein is a membrane glycoprotein that may have implications in T cell-APC interaction (Ballerini et al., 2006). PRNP-deficient mice demonstrated more aggressive disease onset and a lack of clinical improvement during the chronic phase of EAE (Tsutsui et al., 2008).                                                                                                                                                                                                                                                                                                |
| <i>BATF</i>                                               | BATF belongs to the AP-1 superfamily of transcription factors. The leucine zipper of this protein mediates dimerization with members of the Jun family of proteins. This protein is thought to be a negative regulator of AP-1/ATF transcriptional events. BATF further plays a critical role in T <sub>H</sub> 17 differentiation (Ciofani et al., 2012; Schraml et al., 2009).                                                                                                                                                                                                 |
| <i>LGMN</i>                                               | Legumain is a cysteine protease that has a strict specificity for hydrolysis of asparaginyl bonds. LGMN expression has been associated with the T <sub>reg</sub> phenotype following GARP overexpression (Probst-Kepper et al., 2009).                                                                                                                                                                                                                                                                                                                                           |
| <i>LTB</i>                                                | Lymphotoxin B is a member of the tumour necrosis factor (TNF) superfamily. LTB has roles in driving lymphoid organogenesis as well as in effector immune responses (Upadhyay and Fu, 2013).                                                                                                                                                                                                                                                                                                                                                                                      |
| <i>ZBP1</i>                                               | Z-DNA binding protein 1 is a DNA-dependent activator of IFN-regulatory factors and induced type-I interferon production (Kim et al., 2011). It enhances the proliferation, and induction of effector and memory CTLs (Lladser et al. 2011).                                                                                                                                                                                                                                                                                                                                      |
| <i>PIK3IP1</i>                                            | PI3K interacting protein 1 has been suggested to negatively regulate PI3K-signalling (DeFrances et al., 2012).                                                                                                                                                                                                                                                                                                                                                                                                                                                                   |
| <i>MAF</i>                                                | V-maf avian musculoaponeurotic fibrosarcoma oncogene homolog is a leucine zipper-containing transcription factor that acts as a homodimer or as a heterodimer and plays a central role in T <sub>H</sub> 17 cell differentiation and regulation of T cell effector mechanisms (Ciofani et al., 2012).                                                                                                                                                                                                                                                                            |

|                                                           |                                                                                                                                                                                                                                                                                                                                                                                                                                                                                                                           |
|-----------------------------------------------------------|---------------------------------------------------------------------------------------------------------------------------------------------------------------------------------------------------------------------------------------------------------------------------------------------------------------------------------------------------------------------------------------------------------------------------------------------------------------------------------------------------------------------------|
| <i>HOPX</i>                                               | HOPX is a homeodomain protein that lacks certain conserved residues required for DNA binding and has been implicated in T <sub>reg</sub> function (Hawiger et al., 2010).                                                                                                                                                                                                                                                                                                                                                 |
| <i>DUSP6</i>                                              | Dual specificity protein phosphatases negatively regulate members of the mitogen-activated protein (MAP) kinase superfamily. DUSP6 preferentially dephosphorylates ERK1/2 and its depletion in CD4 <sup>+</sup> T cells exacerbates spontaneous colitis in IL-10-deficient mice (Bertin et al., 2015).                                                                                                                                                                                                                    |
| <i>CD69</i>                                               | CD69 is a calcium dependent lectin superfamily of type II transmembrane receptors. It is a marker of early T cell activation and it has been recently described as a general marker for tissue resident T lymphocytes (Sathaliyawala et al., 2013)                                                                                                                                                                                                                                                                        |
| <i>TGFB1</i>                                              | Transforming growth factor $\beta$ 1 is a cytokine with pleiotropic effects in immunoregulation and inflammation, specifically in maintaining T cell tolerance and effector T cell-Treg homeostasis (Li and Flavell, 2008).                                                                                                                                                                                                                                                                                               |
| <i>ITGB7</i>                                              | ITGB7 is a member of the integrin superfamily. It can dimerize with alpha E to promote T cell adhesion to epithelial cells (Cepek et al., 1994) or with alpha 4 forming a homing receptor ( $\alpha$ 4 $\beta$ 7) for migration of lymphocytes to the intestinal mucosa and Peyer's patches (Farstad et al., 1996; Williams and Butcher, 1997).                                                                                                                                                                           |
| <i>PRDM1</i>                                              | Prdm1 (Blimp-1) is a direct repressor of Bcl-6 expression and Tfh differentiation. In T <sub>H</sub> 1 cells it regulates <i>Il10</i> expression, synergistically with c-MAF (Neumann, et al., 2014). It has been recently demonstrated that it cooperates with the transcription factor Hobit to instruct a transcriptional program of CD8 <sup>+</sup> tissue resident T lymphocytes (Mackay et al., 2016).                                                                                                             |
| <i>JARID2</i>                                             | JARID2 is a DNA-binding protein that functions as a transcriptional repressor by interacting with the Polycomb repressive complex 2. JARID2 has been shown to play a role in T <sub>H</sub> 17-T <sub>reg</sub> balance (Escobar et al., 2014).                                                                                                                                                                                                                                                                           |
| <i>KLF2</i>                                               | Kruppel-like factor 2 is a zinc finger transcription factors and is involved in regulating T-cell trafficking, as well as counteracting the development of the T <sub>FH</sub> phenotype (Weber et al., 2015). KLF2 is necessary for the generation of iT <sub>reg</sub> but not nT <sub>reg</sub> (Pabbisetty et al., 2014) and its deficiency unrestrain cytokine production in naive T cells (Weinreich et al., 2009).                                                                                                 |
| <i>BACH2</i>                                              | BACH2 is a basic leucine zipper transcription factor that acts mainly as a transcriptional repressor and is required for T <sub>reg</sub> development and effector T cell-Treg homeostasis (Roychoudhuri et al., 2013).                                                                                                                                                                                                                                                                                                   |
| <i>TBKBP1</i>                                             | TBKBP1 is an adaptor protein that binds to TBK1 and is part of the interaction network in the TNF/NF- $\kappa$ B pathway (Bouwmeester et al., 2004).                                                                                                                                                                                                                                                                                                                                                                      |
| <i>NFATC2</i>                                             | NFATC2 is a member of the nuclear factor of activated T cells (NFAT) family and plays a crucial role in inducing gene transcription during immune responses (Rao et al., 1997). Mice expressing hyperactivable NFAT1 ( <i>Nfatc2</i> ) in their T-cell compartment exhibited a dramatically increased frequency of both IL-17- and IL-10-producing cells after differentiation under T <sub>H</sub> 17 conditions, and showed decreased susceptibility to experimental autoimmune encephalomyelitis (Ghosh et al., 2010). |
| <i>E2F2</i>                                               | E2F2 is a member of the E2F family of transcription factors that play crucial roles in the control of cell cycle proteins; E2F2-deficient T lymphocytes exhibit enhanced TCR-stimulated proliferation and a lower activation threshold, leading to the accumulation of a population of autoreactive effector/memory T lymphocytes, which appear to be responsible for causing autoimmunity in E2F2-deficient mice (Murga et al., 2001).                                                                                   |
| <b>T<sub>H</sub>17-IL-10<sup>-</sup> associated genes</b> |                                                                                                                                                                                                                                                                                                                                                                                                                                                                                                                           |
| <b>Gene</b>                                               | <b>Description</b>                                                                                                                                                                                                                                                                                                                                                                                                                                                                                                        |
| <i>CD276</i>                                              | CD276/B7-H3 belongs to the immunoglobulin superfamily, and is thought to participate in the regulation of T-cell-mediated immune responses. SNPs in this gene have been associated with rheumatoid arthritis (Yoon et al., 2014).                                                                                                                                                                                                                                                                                         |
| <i>IL2RA</i>                                              | Interleukin 2 receptor alpha. Besides its crucial function in IL-2 signaling, genetic variants of this gene are associated with multiple sclerosis (Traboulsee et al., 2014), mainly due to the increased frequency of GM-CSF-producing T <sub>H</sub> cells (Hartmann et al. 2014).                                                                                                                                                                                                                                      |
| <i>PTPRK</i>                                              | Protein tyrosine phosphatase receptor type K. Its deletion causes T-helper immunodeficiency (thid) in the LEC rat (Iwata et al., 2010).                                                                                                                                                                                                                                                                                                                                                                                   |
| <i>CSF2</i>                                               | Granulocyte-macrophage colony stimulating factor 2. GM-CSF production by T <sub>H</sub> 17 cells is essential for EAE induction in mice (Codarri et al., 2011).                                                                                                                                                                                                                                                                                                                                                           |
| <i>TOX2</i>                                               | TOX high mobility group box family member 2 has been reported to play a role in human NK-cell development where it upregulates T-bet expression (Vong et al., 2014).                                                                                                                                                                                                                                                                                                                                                      |
| <i>IL12RB2</i>                                            | Interleukin 12 receptor $\beta$ 2 gene expression is upregulated by IFN- $\gamma$ in T cells, and plays a role in T <sub>H</sub> 1 cell differentiation. An implication of this receptor in T <sub>H</sub> 17 plasticity towards the T <sub>H</sub> 1 phenotype has been suggested (Lexberg et al., 2010).                                                                                                                                                                                                                |
| <i>MYB</i>                                                | c-MYB is a protein belonging to the MYB family of transcription factors and has been demonstrated to play a role in T cell lineage development (Hu et al., 2010). MYB favors erythropoiesis and restrains megakaryopoiesis through the transactivation of miR-486-3p expression and the subsequent downregulation of MAF (Bianchi et al. 2015).                                                                                                                                                                           |
| <i>IL17F</i>                                              | IL-17F is produced by a variety of adaptive and innate immune cells including T <sub>H</sub> 17. IL-17F has similar functions in inducing pro-inflammatory immune responses compared to IL-17A, binds to the same receptor and both cytokines can act as homo- or heterodimers (Song and Qian, 2013).                                                                                                                                                                                                                     |
| <i>GJB2</i>                                               | GJB2 is a member of the gap junction protein family. Missense single-nucleotide variants in this gene have been associated with psoriasis development (Tang et al., 2014).                                                                                                                                                                                                                                                                                                                                                |
| <i>IFNG</i>                                               | IFN- $\gamma$ represents the signature cytokine of Th1 cells with antiviral, immunoregulatory and anti-tumor properties and is a potent activator of macrophages. IFN- $\gamma$ production by T <sub>H</sub> 17 cells has been associated with chronic inflammatory conditions (Korn et al., 2009).                                                                                                                                                                                                                       |
| <i>IL23R</i>                                              | IL-23R pairs with the receptor molecule IL-12R $\beta$ 1, and both are required for IL-23 signaling. GWAS have identified SNPs in the IL-23R gene that strongly support a role for IL-23R in inducing human autoimmunity and chronic inflammation (Korn et al., 2009).                                                                                                                                                                                                                                                    |
| <i>CCR7</i>                                               | CCR7 is the receptor for CCL19. It drives lymphocytes and dendritic cells from peripheral tissues to lymph nodes via afferent lymphatics (Forster et al., 1999; Bromley et al. 2005).                                                                                                                                                                                                                                                                                                                                     |

|              |                                                                                                                                                                                                                                                                                                                                                                                                                                                                                                                                                                                  |
|--------------|----------------------------------------------------------------------------------------------------------------------------------------------------------------------------------------------------------------------------------------------------------------------------------------------------------------------------------------------------------------------------------------------------------------------------------------------------------------------------------------------------------------------------------------------------------------------------------|
| <i>CXCR3</i> | CXCR3 is the receptor for CXCL9, CXCL10 and CXCL11 and it is mainly expressed on T lymphocytes and NK cells. In T lymphocytes CXCR3 is specifically expressed on the surface of T <sub>H</sub> 1 (Bonecchi et al., 1998; Sallusto et al., 1998) and T <sub>H</sub> 1/17 cells (Acosta-Rodriguez et al., 2007). CXCR3 <sup>+</sup> T cells are enriched at inflamed sites in autoimmune diseases (Qin et al., 1998; Balashov et al., 1999).                                                                                                                                       |
| <i>IL2</i>   | Interleukin-2 is a pleiotropic cytokine that drives T-cell growth, augments NK cytolytic activity, induces the differentiation of regulatory T cells, and mediates activation-induced cell death (Liao et al., 2011). It strongly induces GM-CSF production by human T <sub>H</sub> lymphocytes (Hartmann et al., 2014).                                                                                                                                                                                                                                                         |
| <i>IL22</i>  | Interleukin 22 is one of the IL-10 family cytokines. IL-22 can be produced by several immune cells including T <sub>H</sub> 22 and T <sub>H</sub> 17 cells. IL-22 appears to have a crucial role in host defense and epithelial barrier function (Ouyang et al., 2008).                                                                                                                                                                                                                                                                                                          |
| <i>IL6</i>   | Interleukin-6 is a cytokine that functions in inflammation and the maturation of B cells; it is secreted by T cells and macrophages to stimulate immune response and it is an endogenous pyrogen. IL-6 induces the differentiation of T <sub>H</sub> 17 from naive T cells (Bettelli et al., 2006) and it has been linked to inflammatory and autoimmune diseases, such as rheumatoid arthritis and inflammatory bowel disease (Calabrese et al. 2014).                                                                                                                          |
| <i>IL1R1</i> | IL1R1 is a receptor for IL-1 $\alpha$ , IL-1 $\beta$ and IL-1RA. It is an important mediator involved in many cytokine-induced inflammatory immune responses. IL-1 $\beta$ signaling plays a role in the differentiation of T <sub>H</sub> 17 cells (Acosta-Rodriguez et al., 2007). IL-1 signaling through the IL-1R1 is critical for the expansion of autoreactive GM-CSF <sup>+</sup> T <sub>H</sub> 17 cells in EAE and T-cell-specific deletion of IL-1R1 resulted in a mild disease, while mice with global IL-1R1 deletion were resistant to EAE (Mufazalov et al. 2017). |

**Supplementary Table 2**

| <b>GREAT version 3.0.</b> | <b>Association rule: Basal+extension: 5000 bp upstream, 1000 bp downstream, 185000 bp max extension, curated regulatory domains included</b>                                |
|---------------------------|-----------------------------------------------------------------------------------------------------------------------------------------------------------------------------|
|                           | <b>Species assembly: hg19</b>                                                                                                                                               |
| <i>A2M</i>                | c-MAF_3898 (+90979)                                                                                                                                                         |
| <i>AAAS</i>               | c-MAF_4935 (+523)                                                                                                                                                           |
| <i>AAGAB</i>              | c-MAF_5442 (-347), c-MAF_5293 (+104258), c-MAF_1931 (+109970), c-MAF_3048 (+139421), c-MAF_1319 (+153392), c-MAF_4331 (+163211), c-MAF_5397 (+172254), c-MAF_3936 (+180359) |
| <i>AAK1</i>               | c-MAF_4290 (-31932), c-MAF_3906 (+874), c-MAF_3463 (+14902), c-MAF_1887 (+31292), c-MAF_3111 (+136153)                                                                      |
| <i>AATK</i>               | c-MAF_4160 (+13346)                                                                                                                                                         |
| <i>ABCA1</i>              | c-MAF_6436 (-143095), c-MAF_5642 (-125001)                                                                                                                                  |
| <i>ABCB8</i>              | c-MAF_3586 (+10913)                                                                                                                                                         |
| <i>ABCC1</i>              | c-MAF_3625 (-51680), c-MAF_5827 (+3003), c-MAF_6232 (+11908), c-MAF_5755 (+83951)                                                                                           |
| <i>ABCC10</i>             | c-MAF_3700 (-43686)                                                                                                                                                         |
| <i>ABCC5</i>              | c-MAF_6092 (-4462)                                                                                                                                                          |
| <i>ABCD2</i>              | c-MAF_5088 (-424)                                                                                                                                                           |
| <i>ABCG1</i>              | c-MAF_3916 (-30698), c-MAF_1970 (+15430), c-MAF_4240 (+17803)                                                                                                               |
| <i>ABCG2</i>              | c-MAF_3524 (+401), c-MAF_3149 (+150129)                                                                                                                                     |
| <i>ABHD10</i>             | c-MAF_1807 (-15419)                                                                                                                                                         |
| <i>ABHD12</i>             | c-MAF_569 (+80428)                                                                                                                                                          |
| <i>ABHD17A</i>            | c-MAF_6332 (+2901)                                                                                                                                                          |
| <i>ABHD17B</i>            | c-MAF_4102 (+1884), c-MAF_6667 (+88221), c-MAF_6213 (+115379), c-MAF_4191 (+127554)                                                                                         |
| <i>ABHD2</i>              | c-MAF_3585 (-19819)                                                                                                                                                         |
| <i>ABHD3</i>              | c-MAF_4743 (-30889)                                                                                                                                                         |
| <i>ABII</i>               | c-MAF_3952 (+114635), c-MAF_186 (+121463), c-MAF_6442 (+139251)                                                                                                             |
| <i>ABI3</i>               | c-MAF_4189 (+7936)                                                                                                                                                          |
| <i>ABL1</i>               | c-MAF_2744 (+51992)                                                                                                                                                         |
| <i>ABL2</i>               | c-MAF_3951 (+100278), c-MAF_2251 (+108188)                                                                                                                                  |
| <i>ABLIM1</i>             | c-MAF_2380 (-143236), c-MAF_1303 (+23565), c-MAF_4586 (+53025), c-MAF_6739 (+158480)                                                                                        |
| <i>ABR</i>                | c-MAF_6086 (+180297)                                                                                                                                                        |
| <i>ABTB1</i>              | c-MAF_5882 (+567)                                                                                                                                                           |
| <i>ABTB2</i>              | c-MAF_2092 (-13625), c-MAF_4491 (+113638), c-MAF_980 (+122433)                                                                                                              |
| <i>ACAA2</i>              | c-MAF_6165 (-28113), c-MAF_6287 (-6030)                                                                                                                                     |
| <i>ACADS</i>              | c-MAF_6474 (+95382)                                                                                                                                                         |
| <i>ACAN</i>               | c-MAF_4955 (-163186)                                                                                                                                                        |
| <i>ACAT1</i>              | c-MAF_3432 (+14857)                                                                                                                                                         |
| <i>ACBD6</i>              | c-MAF_6700 (+116061)                                                                                                                                                        |
| <i>ACER3</i>              | c-MAF_3470 (+58225)                                                                                                                                                         |
| <i>ACKR4</i>              | c-MAF_1317 (-47046), c-MAF_527 (-27852)                                                                                                                                     |
| <i>ACLY</i>               | c-MAF_2594 (+49686)                                                                                                                                                         |
| <i>ACOT1</i>              | c-MAF_4982 (-59370)                                                                                                                                                         |
| <i>ACOT7</i>              | c-MAF_5647 (-7833)                                                                                                                                                          |
| <i>ACOXL</i>              | c-MAF_1965 (+16013), c-MAF_2313 (+72418), c-MAF_1283 (+114536), c-MAF_1209 (+120073), c-MAF_2330 (+125946), c-MAF_1559 (+134577)                                            |
| <i>ACP2</i>               | c-MAF_5137 (+32677)                                                                                                                                                         |
| <i>ACP5</i>               | c-MAF_4944 (-2062)                                                                                                                                                          |
| <i>ACP6</i>               | c-MAF_2532 (+41239)                                                                                                                                                         |

|                 |                                                                                                     |
|-----------------|-----------------------------------------------------------------------------------------------------|
| <i>ACRC</i>     | c-MAF_5503 (-43804), c-MAF_176 (-36809)                                                             |
| <i>ACSF3</i>    | c-MAF_6538 (-73368)                                                                                 |
| <i>ACSL1</i>    | c-MAF_1240 (-18974)                                                                                 |
| <i>ACSL3</i>    | c-MAF_3600 (-47318)                                                                                 |
| <i>ACSL4</i>    | c-MAF_3443 (-107437)                                                                                |
| <i>ACSL6</i>    | c-MAF_3104 (-11441)                                                                                 |
| <i>ACTA1</i>    | c-MAF_1761 (-7168)                                                                                  |
| <i>ACTA2</i>    | c-MAF_2853 (-172406), c-MAF_4600 (-84904), c-MAF_3349 (-9826), c-MAF_2345 (-144)                    |
| <i>ACTB</i>     | c-MAF_6617 (-47854)                                                                                 |
| <i>ACTBL2</i>   | c-MAF_2011 (+154639), c-MAF_1597 (+165838)                                                          |
| <i>ACTG2</i>    | c-MAF_3188 (-61771)                                                                                 |
| <i>ACTN1</i>    | c-MAF_823 (-89995), c-MAF_1205 (+124556), c-MAF_4807 (+163094)                                      |
| <i>ACTN4</i>    | c-MAF_4105 (-10795), c-MAF_1114 (+14956), c-MAF_5174 (+28214)                                       |
| <i>ACTR10</i>   | c-MAF_5921 (+39051)                                                                                 |
| <i>ACTR1A</i>   | c-MAF_755 (-2307)                                                                                   |
| <i>ACTR1B</i>   | c-MAF_3836 (+990)                                                                                   |
| <i>ACTR2</i>    | c-MAF_3617 (+73322), c-MAF_2403 (+92491)                                                            |
| <i>ACTR3</i>    | c-MAF_1029 (-97959), c-MAF_4646 (-13007)                                                            |
| <i>ACTR3C</i>   | c-MAF_479 (+2552)                                                                                   |
| <i>ACVRI</i>    | c-MAF_2732 (+19148)                                                                                 |
| <i>ACVRIC</i>   | c-MAF_5486 (+148926), c-MAF_4057 (+159527), c-MAF_2262 (+164659)                                    |
| <i>ACYP2</i>    | c-MAF_6167 (-74040), c-MAF_4245 (-61179)                                                            |
| <i>ADA</i>      | c-MAF_1311 (+98218)                                                                                 |
| <i>ADAM12</i>   | c-MAF_3641 (-9365), c-MAF_1322 (-4263)                                                              |
| <i>ADAM17</i>   | c-MAF_5925 (-71685), c-MAF_6180 (-52310)                                                            |
| <i>ADAM19</i>   | c-MAF_5847 (-32141), c-MAF_3442 (-27864), c-MAF_4093 (+137), c-MAF_3398 (+5877), c-MAF_484 (+31022) |
| <i>ADAM30</i>   | c-MAF_4984 (-71569)                                                                                 |
| <i>ADAM33</i>   | c-MAF_6615 (+5457)                                                                                  |
| <i>ADAM9</i>    | c-MAF_1358 (-471)                                                                                   |
| <i>ADAMTS15</i> | c-MAF_5727 (+182298)                                                                                |
| <i>ADAMTSL4</i> | c-MAF_3291 (+14291), c-MAF_1503 (+18210)                                                            |
| <i>ADAP1</i>    | c-MAF_1819 (+24479)                                                                                 |
| <i>ADAP2</i>    | c-MAF_5028 (+17467)                                                                                 |
| <i>ADARB1</i>   | c-MAF_559 (+4605), c-MAF_5059 (+13200), c-MAF_4671 (+35464)                                         |
| <i>ADAT2</i>    | c-MAF_4998 (+3261), c-MAF_3130 (+8727)                                                              |
| <i>ADC</i>      | c-MAF_529 (+18412), c-MAF_144 (+46483)                                                              |
| <i>ADCK3</i>    | c-MAF_4414 (+41744)                                                                                 |
| <i>ADCK4</i>    | c-MAF_3610 (+47)                                                                                    |
| <i>ADCY10</i>   | c-MAF_2756 (+110699)                                                                                |
| <i>ADCY3</i>    | c-MAF_6776 (+93284)                                                                                 |
| <i>ADCY7</i>    | c-MAF_4175 (+1364), c-MAF_1848 (+72653)                                                             |
| <i>ADD3</i>     | c-MAF_6056 (+69851), c-MAF_2845 (+76174), c-MAF_2043 (+93822)                                       |
| <i>ADHFE1</i>   | c-MAF_175 (+103438), c-MAF_6549 (+116456)                                                           |
| <i>ADIPOQ</i>   | c-MAF_2621 (+28978)                                                                                 |
| <i>ADIRF</i>    | c-MAF_3624 (+115813)                                                                                |

|                |                                                                                                                                                                         |
|----------------|-------------------------------------------------------------------------------------------------------------------------------------------------------------------------|
| <i>ADK</i>     | c-MAF_1842 (+73173)                                                                                                                                                     |
| <i>ADM</i>     | c-MAF_4232 (+95936)                                                                                                                                                     |
| <i>ADNP2</i>   | c-MAF_6123 (+48774), c-MAF_2478 (+84955)                                                                                                                                |
| <i>ADO</i>     | c-MAF_1917 (-167040), c-MAF_5054 (-156897), c-MAF_5792 (-149120), c-MAF_5664 (-123328), c-MAF_2469 (-71623), c-MAF_1487 (+6843)                                         |
| <i>ADORA2A</i> | c-MAF_156 (-25978), c-MAF_2111 (+7164), c-MAF_5274 (+46876), c-MAF_4748 (+59123)                                                                                        |
| <i>ADORA3</i>  | c-MAF_2481 (-100713), c-MAF_3909 (-89540), c-MAF_5244 (-8233), c-MAF_258 (-5039), c-MAF_2148 (+27648)                                                                   |
| <i>ADPGK</i>   | c-MAF_5038 (+43436)                                                                                                                                                     |
| <i>ADPRH</i>   | c-MAF_4367 (+3136)                                                                                                                                                      |
| <i>ADRA1B</i>  | c-MAF_5982 (-146726), c-MAF_1332 (-137863), c-MAF_3939 (-102362)                                                                                                        |
| <i>ADRA1D</i>  | c-MAF_94 (+87936)                                                                                                                                                       |
| <i>ADRB2</i>   | c-MAF_1961 (-18361)                                                                                                                                                     |
| <i>ADRBK1</i>  | c-MAF_4012 (-25314), c-MAF_3548 (+5013)                                                                                                                                 |
| <i>ADRBK2</i>  | c-MAF_4652 (+145000)                                                                                                                                                    |
| <i>ADSL</i>    | c-MAF_4644 (-149714), c-MAF_6106 (-60786), c-MAF_4862 (-58379), c-MAF_4194 (-11566)                                                                                     |
| <i>ADSS</i>    | c-MAF_3450 (+16333), c-MAF_2968 (+41988), c-MAF_592 (+126628)                                                                                                           |
| <i>ADSSL1</i>  | c-MAF_1321 (+16566)                                                                                                                                                     |
| <i>ADTRP</i>   | c-MAF_4705 (+46709), c-MAF_5227 (+66153)                                                                                                                                |
| <i>AEBP2</i>   | c-MAF_3171 (+112947)                                                                                                                                                    |
| <i>AEN</i>     | c-MAF_4964 (+984)                                                                                                                                                       |
| <i>AFAP1</i>   | c-MAF_2264 (+111442)                                                                                                                                                    |
| <i>AFAP1L2</i> | c-MAF_6739 (-95333), c-MAF_5384 (+66905)                                                                                                                                |
| <i>AFF1</i>    | c-MAF_6495 (-6942), c-MAF_398 (+72814)                                                                                                                                  |
| <i>AFTPH</i>   | c-MAF_2278 (-41916)                                                                                                                                                     |
| <i>AGA</i>     | c-MAF_6533 (+39018)                                                                                                                                                     |
| <i>AGBL2</i>   | c-MAF_5375 (+4889)                                                                                                                                                      |
| <i>AGFG1</i>   | c-MAF_1893 (-60593), c-MAF_2091 (-56410), c-MAF_828 (-11809)                                                                                                            |
| <i>AGGF1</i>   | c-MAF_2793 (-70860)                                                                                                                                                     |
| <i>AGK</i>     | c-MAF_4732 (+13216), c-MAF_2042 (+34960), c-MAF_6320 (+109416)                                                                                                          |
| <i>AGMAT</i>   | c-MAF_5984 (+5250)                                                                                                                                                      |
| <i>AGO2</i>    | c-MAF_1879 (+38400), c-MAF_197 (+43974), c-MAF_1524 (+63175), c-MAF_3593 (+83890), c-MAF_6176 (+90578), c-MAF_1399 (+92301), c-MAF_1782 (+121036), c-MAF_1713 (+122977) |
| <i>AGPAT9</i>  | c-MAF_3178 (+12528), c-MAF_3085 (+17145)                                                                                                                                |
| <i>AHCY</i>    | c-MAF_5231 (-47011), c-MAF_5424 (-31520)                                                                                                                                |
| <i>AHCYL2</i>  | c-MAF_6175 (-299), c-MAF_6391 (+119517)                                                                                                                                 |
| <i>AHI1</i>    | c-MAF_1015 (-126868), c-MAF_5566 (-79677), c-MAF_1947 (-70875), c-MAF_47 (-40138), c-MAF_3026 (+115352)                                                                 |
| <i>AHNAK</i>   | c-MAF_943 (+118833)                                                                                                                                                     |
| <i>AHNAK2</i>  | c-MAF_3051 (-25862)                                                                                                                                                     |
| <i>AHR</i>     | c-MAF_5831 (-159198), c-MAF_4794 (-63892), c-MAF_985 (-37135)                                                                                                           |
| <i>AHRR</i>    | c-MAF_6775 (+88553), c-MAF_4299 (+107716)                                                                                                                               |
| <i>AHSA1</i>   | c-MAF_3507 (-152)                                                                                                                                                       |
| <i>AIFM1</i>   | c-MAF_2358 (+44866)                                                                                                                                                     |
| <i>AIFM2</i>   | c-MAF_6133 (+39366)                                                                                                                                                     |
| <i>AIM1</i>    | c-MAF_1104 (+9294), c-MAF_2180 (+16337), c-MAF_3081 (+41161)                                                                                                            |
| <i>AIM2</i>    | c-MAF_3011 (-228), c-MAF_5738 (+64312)                                                                                                                                  |
| <i>AIP</i>     | c-MAF_3440 (+156)                                                                                                                                                       |

|                 |                                                                                                        |
|-----------------|--------------------------------------------------------------------------------------------------------|
| <i>AK2</i>      | c-MAF_4931 (+32228), c-MAF_3433 (+55818)                                                               |
| <i>AK4</i>      | c-MAF_6642 (-138445)                                                                                   |
| <i>AK7</i>      | c-MAF_3180 (+105085)                                                                                   |
| <i>AKAP1</i>    | c-MAF_2520 (-76060)                                                                                    |
| <i>AKAP11</i>   | c-MAF_6393 (+4720), c-MAF_704 (+82761), c-MAF_92 (+121302), c-MAF_1215 (+133669)                       |
| <i>AKAP12</i>   | c-MAF_4842 (+133669)                                                                                   |
| <i>AKAP13</i>   | c-MAF_6490 (-100367), c-MAF_3126 (-62156), c-MAF_174 (-49576), c-MAF_4976 (-22635), c-MAF_315 (+27621) |
| <i>AKAP2</i>    | c-MAF_4726 (+114799)                                                                                   |
| <i>AKAP4</i>    | c-MAF_3704 (-3589)                                                                                     |
| <i>AKAP5</i>    | c-MAF_5814 (-50449), c-MAF_5265 (-28415)                                                               |
| <i>AKAP6</i>    | c-MAF_4297 (-42524)                                                                                    |
| <i>AKAP8</i>    | c-MAF_4761 (+61622), c-MAF_5561 (+75611), c-MAF_5580 (+78979)                                          |
| <i>AKIRIN2</i>  | c-MAF_2460 (-21232), c-MAF_2002 (+165)                                                                 |
| <i>AKNA</i>     | c-MAF_1540 (-90609), c-MAF_6568 (+8569), c-MAF_4434 (+21224), c-MAF_881 (+27744)                       |
| <i>AKRIA1</i>   | c-MAF_5251 (+62)                                                                                       |
| <i>AKR7A3</i>   | c-MAF_5894 (+31899)                                                                                    |
| <i>AKT1S1</i>   | c-MAF_1106 (-19983)                                                                                    |
| <i>AKT3</i>     | c-MAF_3877 (+139321)                                                                                   |
| <i>ALAS1</i>    | c-MAF_2637 (-23076)                                                                                    |
| <i>ALDH16A1</i> | c-MAF_1310 (+5143), c-MAF_3371 (+16155)                                                                |
| <i>ALDH1A1</i>  | c-MAF_1305 (-179482)                                                                                   |
| <i>ALDH1L2</i>  | c-MAF_3892 (+125946)                                                                                   |
| <i>ALDH4A1</i>  | c-MAF_2410 (-23946)                                                                                    |
| <i>ALDH7A1</i>  | c-MAF_5283 (+148754)                                                                                   |
| <i>ALG12</i>    | c-MAF_4633 (+50280)                                                                                    |
| <i>ALG13</i>    | c-MAF_5687 (+468)                                                                                      |
| <i>ALG9</i>     | c-MAF_6537 (+69608)                                                                                    |
| <i>ALKBH8</i>   | c-MAF_6680 (+3844)                                                                                     |
| <i>ALOX15</i>   | c-MAF_6186 (-54211), c-MAF_5783 (-36412), c-MAF_6353 (-16367)                                          |
| <i>ALOX5</i>    | c-MAF_6651 (-20999)                                                                                    |
| <i>ALOX5AP</i>  | c-MAF_3731 (-39012), c-MAF_5955 (+4860), c-MAF_2630 (+9040)                                            |
| <i>ALPK2</i>    | c-MAF_2319 (+13014)                                                                                    |
| <i>ALS2CL</i>   | c-MAF_5161 (+63554)                                                                                    |
| <i>ALS2CR12</i> | c-MAF_605 (+94382)                                                                                     |
| <i>AMD1</i>     | c-MAF_4736 (-313)                                                                                      |
| <i>AMICA1</i>   | c-MAF_5545 (-16490), c-MAF_3419 (+8504)                                                                |
| <i>AMIGO2</i>   | c-MAF_851 (-136583)                                                                                    |
| <i>AMMECRI</i>  | c-MAF_2296 (+7044), c-MAF_4751 (+172157)                                                               |
| <i>AMN</i>      | c-MAF_908 (-116925)                                                                                    |
| <i>AMPD3</i>    | c-MAF_4232 (-49661), c-MAF_6487 (+5425)                                                                |
| <i>AMZ1</i>     | c-MAF_3879 (-37890), c-MAF_142 (+78849), c-MAF_4055 (+83610)                                           |
| <i>AMZ2</i>     | c-MAF_2943 (-64489), c-MAF_4174 (-8810), c-MAF_3236 (+57)                                              |
| <i>ANAPC1</i>   | c-MAF_375 (+178622)                                                                                    |
| <i>ANAPC10</i>  | c-MAF_5904 (-78744)                                                                                    |

|                 |                                                                                                                                                                                                                                          |
|-----------------|------------------------------------------------------------------------------------------------------------------------------------------------------------------------------------------------------------------------------------------|
| <i>ANAPC16</i>  | c-MAF_3137 (-106516)                                                                                                                                                                                                                     |
| <i>ANG</i>      | c-MAF_35 (-2712)                                                                                                                                                                                                                         |
| <i>ANGPTL1</i>  | c-MAF_3292 (+48864)                                                                                                                                                                                                                      |
| <i>ANGPTL2</i>  | c-MAF_1753 (+136907)                                                                                                                                                                                                                     |
| <i>ANGPTL3</i>  | c-MAF_434 (-134955)                                                                                                                                                                                                                      |
| <i>ANGPTL6</i>  | c-MAF_4285 (-2083)                                                                                                                                                                                                                       |
| <i>ANK1</i>     | c-MAF_6624 (+73588), c-MAF_1867 (+104270), c-MAF_404 (+108694), c-MAF_3711 (+111877), c-MAF_3247 (+126144), c-MAF_1434 (+173969), c-MAF_1735 (+180393)                                                                                   |
| <i>ANK3</i>     | c-MAF_5758 (+129226)                                                                                                                                                                                                                     |
| <i>ANKDD1A</i>  | c-MAF_2335 (-34197)                                                                                                                                                                                                                      |
| <i>ANKDD1B</i>  | c-MAF_5156 (-44382), c-MAF_4559 (+58072), c-MAF_4136 (+96656)                                                                                                                                                                            |
| <i>ANKFY1</i>   | c-MAF_5598 (-49133)                                                                                                                                                                                                                      |
| <i>ANKH</i>     | c-MAF_4589 (-85670), c-MAF_2506 (-72438), c-MAF_2898 (-70706), c-MAF_370 (-61507), c-MAF_1157 (-53696), c-MAF_5232 (-49675), c-MAF_2834 (+61840), c-MAF_5452 (+76585)                                                                    |
| <i>ANKK1</i>    | c-MAF_1254 (-138517)                                                                                                                                                                                                                     |
| <i>ANKRD11</i>  | c-MAF_4846 (+38060), c-MAF_5122 (+67672), c-MAF_6456 (+81321), c-MAF_4747 (+125280), c-MAF_3754 (+139765), c-MAF_2165 (+164333), c-MAF_3318 (+170290), c-MAF_3214 (+174505)                                                              |
| <i>ANKRD12</i>  | c-MAF_5857 (-156)                                                                                                                                                                                                                        |
| <i>ANKRD13A</i> | c-MAF_3661 (+37361), c-MAF_4952 (+39672), c-MAF_574 (+56199)                                                                                                                                                                             |
| <i>ANKRD13B</i> | c-MAF_3574 (+21819)                                                                                                                                                                                                                      |
| <i>ANKRD13C</i> | c-MAF_5756 (+106239)                                                                                                                                                                                                                     |
| <i>ANKRD13D</i> | c-MAF_3548 (-17868)                                                                                                                                                                                                                      |
| <i>ANKRD2</i>   | c-MAF_2223 (-30125)                                                                                                                                                                                                                      |
| <i>ANKRD28</i>  | c-MAF_2731 (+53801), c-MAF_1506 (+58741), c-MAF_4535 (+171875)                                                                                                                                                                           |
| <i>ANKRD32</i>  | c-MAF_2431 (+175573)                                                                                                                                                                                                                     |
| <i>ANKRD39</i>  | c-MAF_1940 (+896)                                                                                                                                                                                                                        |
| <i>ANKRD44</i>  | c-MAF_248 (-17020), c-MAF_6736 (+66064), c-MAF_1784 (+71200), c-MAF_163 (+94077), c-MAF_2928 (+101054), c-MAF_3802 (+111650)                                                                                                             |
| <i>ANKRD46</i>  | c-MAF_1552 (-64227), c-MAF_5296 (+44391), c-MAF_838 (+56995), c-MAF_2077 (+65014), c-MAF_3362 (+95973), c-MAF_6747 (+107657), c-MAF_5252 (+116341), c-MAF_587 (+121416), c-MAF_293 (+128819), c-MAF_1406 (+161104), c-MAF_2059 (+173473) |
| <i>ANKRD6</i>   | c-MAF_5506 (-34634)                                                                                                                                                                                                                      |
| <i>ANKS1A</i>   | c-MAF_4486 (+159532)                                                                                                                                                                                                                     |
| <i>ANLN</i>     | c-MAF_5389 (-181861)                                                                                                                                                                                                                     |
| <i>ANO1</i>     | c-MAF_4870 (-77889), c-MAF_4823 (-61125)                                                                                                                                                                                                 |
| <i>ANO2</i>     | c-MAF_3125 (-123373)                                                                                                                                                                                                                     |
| <i>ANO6</i>     | c-MAF_4647 (-270)                                                                                                                                                                                                                        |
| <i>ANP32E</i>   | c-MAF_5939 (+1465), c-MAF_3539 (+49186)                                                                                                                                                                                                  |
| <i>ANPEP</i>    | c-MAF_1044 (-76197), c-MAF_2094 (+32818)                                                                                                                                                                                                 |
| <i>ANTXR2</i>   | c-MAF_1699 (-101025), c-MAF_330 (-81848), c-MAF_3167 (-69941), c-MAF_328 (+54874), c-MAF_147 (+64543)                                                                                                                                    |
| <i>ANXA1</i>    | c-MAF_1305 (-25117)                                                                                                                                                                                                                      |
| <i>ANXA13</i>   | c-MAF_984 (+57328), c-MAF_697 (+66288)                                                                                                                                                                                                   |
| <i>ANXA2</i>    | c-MAF_6244 (+35100)                                                                                                                                                                                                                      |
| <i>ANXA4</i>    | c-MAF_4290 (-66325), c-MAF_3888 (+28292), c-MAF_4658 (+75110)                                                                                                                                                                            |
| <i>ANXA5</i>    | c-MAF_5164 (-9711), c-MAF_3872 (+1042)                                                                                                                                                                                                   |
| <i>ANXA6</i>    | c-MAF_6211 (+3827), c-MAF_5903 (+32244)                                                                                                                                                                                                  |
| <i>ANXA7</i>    | c-MAF_1840 (+411)                                                                                                                                                                                                                        |
| <i>AOAH</i>     | c-MAF_2364 (+16937), c-MAF_2452 (+37840)                                                                                                                                                                                                 |
| <i>AOX1</i>     | c-MAF_4593 (+127450), c-MAF_5515 (+179870)                                                                                                                                                                                               |



|                 |                                                                                                                                                                                                                                                                               |
|-----------------|-------------------------------------------------------------------------------------------------------------------------------------------------------------------------------------------------------------------------------------------------------------------------------|
| <i>APIAR</i>    | c-MAF_3931 (-63704), c-MAF_421 (-398)                                                                                                                                                                                                                                         |
| <i>APIG1</i>    | c-MAF_6081 (-7591)                                                                                                                                                                                                                                                            |
| <i>APIS2</i>    | c-MAF_5940 (-459), c-MAF_3083 (+37864)                                                                                                                                                                                                                                        |
| <i>APIS3</i>    | c-MAF_677 (-104436), c-MAF_3402 (+76443)                                                                                                                                                                                                                                      |
| <i>AP3D1</i>    | c-MAF_3737 (+2761)                                                                                                                                                                                                                                                            |
| <i>AP3M1</i>    | c-MAF_5149 (+41396), c-MAF_1003 (+70936)                                                                                                                                                                                                                                      |
| <i>AP3M2</i>    | c-MAF_665 (-247), c-MAF_5729 (+20084), c-MAF_843 (+24473)                                                                                                                                                                                                                     |
| <i>AP3S2</i>    | c-MAF_1044 (+3283)                                                                                                                                                                                                                                                            |
| <i>AP4B1</i>    | c-MAF_3004 (+288)                                                                                                                                                                                                                                                             |
| <i>AP4E1</i>    | c-MAF_2985 (-1406)                                                                                                                                                                                                                                                            |
| <i>AP5S1</i>    | c-MAF_1239 (-22391), c-MAF_3174 (-9181), c-MAF_4291 (-249)                                                                                                                                                                                                                    |
| <i>AP5Z1</i>    | c-MAF_4015 (-36409), c-MAF_1230 (-29424)                                                                                                                                                                                                                                      |
| <i>APAF1</i>    | c-MAF_413 (+99793)                                                                                                                                                                                                                                                            |
| <i>APBA1</i>    | c-MAF_3183 (+169172)                                                                                                                                                                                                                                                          |
| <i>APBB1IP</i>  | c-MAF_3132 (+43), c-MAF_4490 (+8217), c-MAF_4723 (+49450)                                                                                                                                                                                                                     |
| <i>APH1B</i>    | c-MAF_3148 (-85004), c-MAF_4183 (-65129), c-MAF_1730 (-44955)                                                                                                                                                                                                                 |
| <i>API5</i>     | c-MAF_5950 (+55961)                                                                                                                                                                                                                                                           |
| <i>APLF</i>     | c-MAF_6759 (-95816), c-MAF_2106 (-43521), c-MAF_6202 (-25900)                                                                                                                                                                                                                 |
| <i>APOA1</i>    | c-MAF_4556 (-170317), c-MAF_133 (-15741)                                                                                                                                                                                                                                      |
| <i>APOA2</i>    | c-MAF_5897 (+6126)                                                                                                                                                                                                                                                            |
| <i>APOBEC3H</i> | c-MAF_1396 (-4709)                                                                                                                                                                                                                                                            |
| <i>APOBEC4</i>  | c-MAF_979 (-154510)                                                                                                                                                                                                                                                           |
| <i>APOBR</i>    | c-MAF_3741 (-460)                                                                                                                                                                                                                                                             |
| <i>APOL1</i>    | c-MAF_4162 (+86420), c-MAF_3850 (+91606), c-MAF_2610 (+104076), c-MAF_6570 (+112182), c-MAF_3415 (+116395), c-MAF_2564 (+130377)                                                                                                                                              |
| <i>APOL3</i>    | c-MAF_5328 (-1296)                                                                                                                                                                                                                                                            |
| <i>APOL5</i>    | c-MAF_4209 (-57413)                                                                                                                                                                                                                                                           |
| <i>APOL6</i>    | c-MAF_4209 (+12064)                                                                                                                                                                                                                                                           |
| <i>APOLD1</i>   | c-MAF_2531 (+11491)                                                                                                                                                                                                                                                           |
| <i>APOO</i>     | c-MAF_5661 (-112270)                                                                                                                                                                                                                                                          |
| <i>APPBP2</i>   | c-MAF_5718 (+19682)                                                                                                                                                                                                                                                           |
| <i>APPL2</i>    | c-MAF_239 (+7453)                                                                                                                                                                                                                                                             |
| <i>AQP10</i>    | c-MAF_3458 (-13108)                                                                                                                                                                                                                                                           |
| <i>AQP11</i>    | c-MAF_4856 (+41530)                                                                                                                                                                                                                                                           |
| <i>AQP12B</i>   | c-MAF_5702 (+26542), c-MAF_3211 (+57718), c-MAF_5928 (+61153)                                                                                                                                                                                                                 |
| <i>AQP2</i>     | c-MAF_1968 (-15693), c-MAF_6484 (-4364)                                                                                                                                                                                                                                       |
| <i>AQP3</i>     | c-MAF_6594 (+13431), c-MAF_4471 (+30377)                                                                                                                                                                                                                                      |
| <i>AQP7</i>     | c-MAF_6594 (-31661), c-MAF_4471 (-14715)                                                                                                                                                                                                                                      |
| <i>ARAF</i>     | c-MAF_4906 (+3005)                                                                                                                                                                                                                                                            |
| <i>ARAP2</i>    | c-MAF_554 (-34453), c-MAF_3007 (-11240), c-MAF_1820 (-301), c-MAF_3213 (+54714)                                                                                                                                                                                               |
| <i>ARAP3</i>    | c-MAF_4849 (-167829)                                                                                                                                                                                                                                                          |
| <i>ARCNI</i>    | c-MAF_6183 (+968)                                                                                                                                                                                                                                                             |
| <i>ARF4</i>     | c-MAF_4141 (-108)                                                                                                                                                                                                                                                             |
| <i>ARF6</i>     | c-MAF_1560 (+1925), c-MAF_2121 (+6568), c-MAF_2918 (+18710), c-MAF_3811 (+41725), c-MAF_3968 (+47941), c-MAF_6399 (+68611), c-MAF_58 (+80101), c-MAF_606 (+89608), c-MAF_1024 (+91596), c-MAF_130 (+107776), c-MAF_4061 (+145785), c-MAF_3855 (+152220), c-MAF_3071 (+169793) |

|                 |                                                                                                                                                                                            |
|-----------------|--------------------------------------------------------------------------------------------------------------------------------------------------------------------------------------------|
| <i>ARHGAP10</i> | c-MAF_2444 (-671), c-MAF_75 (+50322), c-MAF_4396 (+62214), c-MAF_6496 (+114420)                                                                                                            |
| <i>ARHGAP17</i> | c-MAF_4981 (-33368)                                                                                                                                                                        |
| <i>ARHGAP18</i> | c-MAF_2677 (-57174), c-MAF_656 (+22929), c-MAF_5632 (+26016)                                                                                                                               |
| <i>ARHGAP21</i> | c-MAF_3759 (+120143)                                                                                                                                                                       |
| <i>ARHGAP25</i> | c-MAF_1471 (-17367), c-MAF_1682 (-7596), c-MAF_5464 (+18829), c-MAF_1186 (+31799)                                                                                                          |
| <i>ARHGAP26</i> | c-MAF_3088 (+13594), c-MAF_3246 (+110435)                                                                                                                                                  |
| <i>ARHGAP27</i> | c-MAF_3012 (+113353), c-MAF_927 (+148067)                                                                                                                                                  |
| <i>ARHGAP31</i> | c-MAF_945 (+2786), c-MAF_1315 (+28802)                                                                                                                                                     |
| <i>ARHGAP35</i> | c-MAF_4049 (+6293), c-MAF_2420 (+37010), c-MAF_4056 (+40216), c-MAF_6309 (+44554), c-MAF_296 (+72721)                                                                                      |
| <i>ARHGAP4</i>  | c-MAF_5215 (-339), c-MAF_1705 (+1425)                                                                                                                                                      |
| <i>ARHGAP5</i>  | c-MAF_4697 (+25465)                                                                                                                                                                        |
| <i>ARHGEF1</i>  | c-MAF_6355 (+3658)                                                                                                                                                                         |
| <i>ARHGEF12</i> | c-MAF_1247 (+7460)                                                                                                                                                                         |
| <i>ARHGEF18</i> | c-MAF_4744 (+41273)                                                                                                                                                                        |
| <i>ARHGEF3</i>  | c-MAF_4612 (+98224)                                                                                                                                                                        |
| <i>ARHGEF37</i> | c-MAF_6470 (+102894)                                                                                                                                                                       |
| <i>ARHGEF6</i>  | c-MAF_940 (-85742), c-MAF_2097 (+34305), c-MAF_4387 (+110597)                                                                                                                              |
| <i>ARHGEF7</i>  | c-MAF_718 (-149808), c-MAF_1092 (-83416), c-MAF_5942 (-68151), c-MAF_4260 (+62018), c-MAF_3701 (+74000), c-MAF_827 (+181383)                                                               |
| <i>ARID1A</i>   | c-MAF_3969 (-139459), c-MAF_1647 (-117806), c-MAF_1825 (-114977), c-MAF_3190 (+6532), c-MAF_252 (+48631)                                                                                   |
| <i>ARID1B</i>   | c-MAF_5371 (+2700), c-MAF_3435 (+88601)                                                                                                                                                    |
| <i>ARID2</i>    | c-MAF_4864 (+18831)                                                                                                                                                                        |
| <i>ARID3B</i>   | c-MAF_666 (+5147)                                                                                                                                                                          |
| <i>ARID4B</i>   | c-MAF_5049 (+146099)                                                                                                                                                                       |
| <i>ARID5A</i>   | c-MAF_1408 (-176664), c-MAF_4757 (-12321), c-MAF_5949 (-4508), c-MAF_741 (+445), c-MAF_3361 (+80709)                                                                                       |
| <i>ARID5B</i>   | c-MAF_2757 (-148582), c-MAF_3002 (-114452), c-MAF_2383 (-85629), c-MAF_5595 (-2031), c-MAF_3710 (+32807), c-MAF_3772 (+41997), c-MAF_6402 (+86861), c-MAF_901 (+91572), c-MAF_62 (+149852) |
| <i>ARIH2</i>    | c-MAF_1531 (-394)                                                                                                                                                                          |
| <i>ARIH2OS</i>  | c-MAF_1367 (-26450), c-MAF_3804 (-7475), c-MAF_1531 (+958)                                                                                                                                 |
| <i>ARL1</i>     | c-MAF_5646 (+53072)                                                                                                                                                                        |
| <i>ARL3</i>     | c-MAF_784 (+3546), c-MAF_4891 (+9297), c-MAF_1182 (+53168), c-MAF_2498 (+67788)                                                                                                            |
| <i>ARL4C</i>    | c-MAF_5253 (+13022), c-MAF_550 (+18468), c-MAF_5534 (+21521), c-MAF_4137 (+32873), c-MAF_2192 (+52011)                                                                                     |
| <i>ARL4D</i>    | c-MAF_1344 (-47842), c-MAF_4505 (-37604)                                                                                                                                                   |
| <i>ARL5A</i>    | c-MAF_5258 (-89976)                                                                                                                                                                        |
| <i>ARL6</i>     | c-MAF_1055 (+107768)                                                                                                                                                                       |
| <i>ARL6IP1</i>  | c-MAF_2881 (-52152)                                                                                                                                                                        |
| <i>ARL6IP5</i>  | c-MAF_2366 (-1943)                                                                                                                                                                         |
| <i>ARL6IP6</i>  | c-MAF_3800 (-144560), c-MAF_6073 (-2571)                                                                                                                                                   |
| <i>ARL8B</i>    | c-MAF_1579 (-135145), c-MAF_4852 (-62281), c-MAF_1972 (-9943)                                                                                                                              |
| <i>ARL9</i>     | c-MAF_1737 (+143158), c-MAF_2327 (+149604)                                                                                                                                                 |
| <i>ARMCX4</i>   | c-MAF_4279 (-57497)                                                                                                                                                                        |
| <i>ARNTL</i>    | c-MAF_5021 (-69579), c-MAF_4464 (-60843), c-MAF_5374 (-679)                                                                                                                                |
| <i>ARPC1A</i>   | c-MAF_591 (+4790)                                                                                                                                                                          |
| <i>ARPC1B</i>   | c-MAF_591 (-44030), c-MAF_1006 (+6452)                                                                                                                                                     |
| <i>ARPC2</i>    | c-MAF_3626 (+1653)                                                                                                                                                                         |

|                |                                                                                                         |
|----------------|---------------------------------------------------------------------------------------------------------|
| <i>ARPC5L</i>  | c-MAF_4480 (+8236)                                                                                      |
| <i>ARRDC2</i>  | c-MAF_5575 (+78646), c-MAF_3267 (+80998)                                                                |
| <i>ARRDC3</i>  | c-MAF_3785 (-7150), c-MAF_995 (+3399), c-MAF_6476 (+64409), c-MAF_442 (+68784), c-MAF_1870 (+102629)    |
| <i>ARSB</i>    | c-MAF_4040 (+31)                                                                                        |
| <i>ARSG</i>    | c-MAF_5697 (-3064)                                                                                      |
| <i>ARTN</i>    | c-MAF_1082 (-67637)                                                                                     |
| <i>ASAH1</i>   | c-MAF_5706 (+143525)                                                                                    |
| <i>ASAH2</i>   | c-MAF_6215 (-169789)                                                                                    |
| <i>ASAP1</i>   | c-MAF_3497 (+122722), c-MAF_5804 (+154245), c-MAF_5795 (+156846), c-MAF_2980 (+165250)                  |
| <i>ASAP2</i>   | c-MAF_5870 (+38434)                                                                                     |
| <i>ASAP3</i>   | c-MAF_5130 (-44164)                                                                                     |
| <i>ASB13</i>   | c-MAF_1038 (+37659)                                                                                     |
| <i>ASB16</i>   | c-MAF_1665 (-10938)                                                                                     |
| <i>ASB2</i>    | c-MAF_208 (-33221), c-MAF_4269 (-21911), c-MAF_3382 (+559), c-MAF_2127 (+17073)                         |
| <i>ASCC1</i>   | c-MAF_16 (-44499), c-MAF_870 (-32239), c-MAF_3942 (-2307)                                               |
| <i>ASCC3</i>   | c-MAF_4413 (+231)                                                                                       |
| <i>ASCL2</i>   | c-MAF_4665 (+1741)                                                                                      |
| <i>ASF1A</i>   | c-MAF_564 (-49038)                                                                                      |
| <i>ASHIL</i>   | c-MAF_547 (+26122)                                                                                      |
| <i>ASIC3</i>   | c-MAF_3586 (-9550)                                                                                      |
| <i>ASPH</i>    | c-MAF_6104 (-45038)                                                                                     |
| <i>ASPM</i>    | c-MAF_4344 (-213)                                                                                       |
| <i>ASPRV1</i>  | c-MAF_642 (-81351), c-MAF_4221 (-67733)                                                                 |
| <i>ASXL1</i>   | c-MAF_1691 (-72420), c-MAF_6387 (-25024)                                                                |
| <i>ASXL2</i>   | c-MAF_1628 (+26499)                                                                                     |
| <i>ATAD2B</i>  | c-MAF_4544 (-106)                                                                                       |
| <i>ATF2</i>    | c-MAF_1343 (+13381)                                                                                     |
| <i>ATF3</i>    | c-MAF_3753 (-119952), c-MAF_6388 (-41374), c-MAF_3330 (-12379), c-MAF_2318 (-6995), c-MAF_5517 (+26574) |
| <i>ATF5</i>    | c-MAF_1106 (-31132), c-MAF_2116 (-263)                                                                  |
| <i>ATF6</i>    | c-MAF_6014 (+6313)                                                                                      |
| <i>ATF7IP</i>  | c-MAF_2885 (-109436), c-MAF_4714 (+1404), c-MAF_4256 (+19677), c-MAF_6274 (+45693)                      |
| <i>ATF7IP2</i> | c-MAF_3914 (-56286), c-MAF_5446 (-52431)                                                                |
| <i>ATG14</i>   | c-MAF_6479 (+71823), c-MAF_2170 (+73912), c-MAF_2259 (+77850)                                           |
| <i>ATG16L1</i> | c-MAF_4238 (-166174), c-MAF_2218 (-85530), c-MAF_581 (-20447), c-MAF_78 (-17128), c-MAF_5191 (-3541)    |
| <i>ATG16L2</i> | c-MAF_971 (+155820)                                                                                     |
| <i>ATG5</i>    | c-MAF_5056 (+49902), c-MAF_1436 (+161758)                                                               |
| <i>ATG9B</i>   | c-MAF_5853 (+16316)                                                                                     |
| <i>ATHL1</i>   | c-MAF_6330 (-8159)                                                                                      |
| <i>ATL2</i>    | c-MAF_5247 (-98132), c-MAF_6485 (+61370), c-MAF_6679 (+102483)                                          |
| <i>ATM</i>     | c-MAF_2599 (+2628)                                                                                      |
| <i>ATMIN</i>   | c-MAF_5035 (-8355)                                                                                      |
| <i>ATOH8</i>   | c-MAF_3853 (-48631), c-MAF_3222 (+113469)                                                               |
| <i>ATP10D</i>  | c-MAF_5160 (+46592)                                                                                     |
| <i>ATP11B</i>  | c-MAF_6572 (-3919)                                                                                      |

|                 |                                                                                                                              |
|-----------------|------------------------------------------------------------------------------------------------------------------------------|
| <i>ATP12A</i>   | c-MAF_6454 (+50606)                                                                                                          |
| <i>ATP1A1</i>   | c-MAF_1925 (+2404), c-MAF_4740 (+16507), c-MAF_1733 (+130568), c-MAF_972 (+141484), c-MAF_4450 (+163808), c-MAF_82 (+170912) |
| <i>ATP1B1</i>   | c-MAF_1474 (+33301)                                                                                                          |
| <i>ATP1B3</i>   | c-MAF_4010 (-79617)                                                                                                          |
| <i>ATP2A3</i>   | c-MAF_1731 (-137154)                                                                                                         |
| <i>ATP2B1</i>   | c-MAF_816 (-155339), c-MAF_4227 (-60524), c-MAF_3832 (-48117), c-MAF_3090 (+110845)                                          |
| <i>ATP2B4</i>   | c-MAF_4866 (-19160), c-MAF_1263 (-785), c-MAF_495 (+26814)                                                                   |
| <i>ATP2C1</i>   | c-MAF_639 (-91757), c-MAF_2837 (-244)                                                                                        |
| <i>ATP2C2</i>   | c-MAF_2925 (+109900)                                                                                                         |
| <i>ATP4A</i>    | c-MAF_5472 (-12158)                                                                                                          |
| <i>ATP5B</i>    | c-MAF_1878 (-38176)                                                                                                          |
| <i>ATP5C1</i>   | c-MAF_6439 (+684)                                                                                                            |
| <i>ATP5E</i>    | c-MAF_6746 (+11242)                                                                                                          |
| <i>ATP5J</i>    | c-MAF_2231 (-96583)                                                                                                          |
| <i>ATP5O</i>    | c-MAF_3744 (-92844), c-MAF_1932 (-61048), c-MAF_4661 (-31879), c-MAF_3827 (-24500)                                           |
| <i>ATP5SL</i>   | c-MAF_1611 (-101499)                                                                                                         |
| <i>ATP6AP1L</i> | c-MAF_5369 (+77977), c-MAF_2903 (+109705)                                                                                    |
| <i>ATP6V0A1</i> | c-MAF_5342 (+65446)                                                                                                          |
| <i>ATP6V0A4</i> | c-MAF_4329 (-77845)                                                                                                          |
| <i>ATP6V1B2</i> | c-MAF_4903 (+54621)                                                                                                          |
| <i>ATP6V1D</i>  | c-MAF_4075 (-13334)                                                                                                          |
| <i>ATP6V1G3</i> | c-MAF_4313 (-80582), c-MAF_5685 (-70658), c-MAF_4433 (+78339)                                                                |
| <i>ATP6V1H</i>  | c-MAF_2414 (-1234)                                                                                                           |
| <i>ATP8B2</i>   | c-MAF_3370 (+70559)                                                                                                          |
| <i>ATP8B4</i>   | c-MAF_5036 (-57930), c-MAF_749 (-18358), c-MAF_6131 (+1), c-MAF_4164 (+72157)                                                |
| <i>ATP9A</i>    | c-MAF_5709 (+23956), c-MAF_6325 (+132261), c-MAF_6500 (+145835), c-MAF_1799 (+157811)                                        |
| <i>ATXN1</i>    | c-MAF_2437 (+29611), c-MAF_2336 (+48387), c-MAF_4270 (+91966), c-MAF_1818 (+101472)                                          |
| <i>ATXN1L</i>   | c-MAF_6081 (-29199)                                                                                                          |
| <i>ATXN2</i>    | c-MAF_2168 (+53432), c-MAF_300 (+154632), c-MAF_3880 (+169333)                                                               |
| <i>ATXN3L</i>   | c-MAF_5787 (-167466), c-MAF_3977 (-108169), c-MAF_2393 (-67467), c-MAF_3287 (+53282)                                         |
| <i>ATXN7</i>    | c-MAF_1888 (+103782)                                                                                                         |
| <i>AUH</i>      | c-MAF_884 (-54510), c-MAF_5948 (+2072), c-MAF_2000 (+153708), c-MAF_33 (+169381), c-MAF_674 (+183771)                        |
| <i>AURKB</i>    | c-MAF_1702 (-10447), c-MAF_6043 (+23241)                                                                                     |
| <i>AVL9</i>     | c-MAF_865 (+7483)                                                                                                            |
| <i>AVPR2</i>    | c-MAF_1705 (+20100)                                                                                                          |
| <i>AZI2</i>     | c-MAF_1042 (+22425)                                                                                                          |
| <i>AZINI</i>    | c-MAF_345 (+53465), c-MAF_5977 (+69132)                                                                                      |
| <i>B3GALT2</i>  | c-MAF_6705 (-117369)                                                                                                         |
| <i>B3GNT3</i>   | c-MAF_5073 (-44954)                                                                                                          |
| <i>B3GNT4</i>   | c-MAF_378 (+12516)                                                                                                           |
| <i>B3GNT5</i>   | c-MAF_3530 (-35455), c-MAF_2920 (+32774), c-MAF_2295 (+53839)                                                                |
| <i>B3GNT6</i>   | c-MAF_3470 (-115243)                                                                                                         |
| <i>B4GALNT2</i> | c-MAF_1608 (+58865)                                                                                                          |
| <i>B4GALNT3</i> | c-MAF_351 (+150087)                                                                                                          |

|                 |                                                                                                                                                                                                                                                                                                                           |
|-----------------|---------------------------------------------------------------------------------------------------------------------------------------------------------------------------------------------------------------------------------------------------------------------------------------------------------------------------|
| <i>B4GALNT4</i> | c-MAF_6753 (-27393)                                                                                                                                                                                                                                                                                                       |
| <i>B4GALTI</i>  | c-MAF_3303 (+7359), c-MAF_4201 (+24750)                                                                                                                                                                                                                                                                                   |
| <i>B4GALT5</i>  | c-MAF_1112 (-62490), c-MAF_1481 (+14568), c-MAF_40 (+36840), c-MAF_2663 (+43879), c-MAF_4443 (+93115), c-MAF_490 (+119444)                                                                                                                                                                                                |
| <i>B9D1</i>     | c-MAF_6758 (-7554)                                                                                                                                                                                                                                                                                                        |
| <i>BACH1</i>    | c-MAF_676 (-117116), c-MAF_6021 (-102937)                                                                                                                                                                                                                                                                                 |
| <i>BACH2</i>    | c-MAF_1312 (-177100), c-MAF_1064 (-169933), c-MAF_150 (-161758), c-MAF_184 (-114858), c-MAF_2894 (-109608), c-MAF_113 (-101401), c-MAF_5151 (-72432), c-MAF_2883 (-55179), c-MAF_8 (+10879), c-MAF_1785 (+22184), c-MAF_6310 (+39675), c-MAF_2215 (+47684), c-MAF_3773 (+56994), c-MAF_1516 (+62587), c-MAF_3258 (+77866) |
| <i>BAG2</i>     | c-MAF_2805 (-24194)                                                                                                                                                                                                                                                                                                       |
| <i>BAG3</i>     | c-MAF_3963 (-8664), c-MAF_3339 (+12544), c-MAF_2842 (+54240)                                                                                                                                                                                                                                                              |
| <i>BAIAP2</i>   | c-MAF_4160 (+117509)                                                                                                                                                                                                                                                                                                      |
| <i>BAIAP2L2</i> | c-MAF_198 (-69565)                                                                                                                                                                                                                                                                                                        |
| <i>BAK1</i>     | c-MAF_1484 (+9219)                                                                                                                                                                                                                                                                                                        |
| <i>BANF2</i>    | c-MAF_6587 (+53966), c-MAF_3595 (+150271)                                                                                                                                                                                                                                                                                 |
| <i>BANP</i>     | c-MAF_4280 (-18805), c-MAF_568 (-13576), c-MAF_4359 (-6389)                                                                                                                                                                                                                                                               |
| <i>BATF</i>     | c-MAF_1108 (+20495), c-MAF_5075 (+28924), c-MAF_152 (+39892), c-MAF_1676 (+44151)                                                                                                                                                                                                                                         |
| <i>BATF3</i>    | c-MAF_4112 (-21794), c-MAF_5872 (-1161), c-MAF_5517 (+64741)                                                                                                                                                                                                                                                              |
| <i>BAZIA</i>    | c-MAF_1265 (+133627)                                                                                                                                                                                                                                                                                                      |
| <i>BBC3</i>     | c-MAF_6344 (-23747), c-MAF_2974 (+46091), c-MAF_3086 (+50252), c-MAF_1587 (+83069)                                                                                                                                                                                                                                        |
| <i>BBS12</i>    | c-MAF_1535 (-99648), c-MAF_4100 (-97262), c-MAF_4811 (-74014), c-MAF_1880 (-42565), c-MAF_4874 (-21838), c-MAF_2086 (+13977)                                                                                                                                                                                              |
| <i>BBS4</i>     | c-MAF_5038 (+54162)                                                                                                                                                                                                                                                                                                       |
| <i>BBX</i>      | c-MAF_5679 (+137668)                                                                                                                                                                                                                                                                                                      |
| <i>BCAR1</i>    | c-MAF_4871 (-76654)                                                                                                                                                                                                                                                                                                       |
| <i>BCAR3</i>    | c-MAF_2252 (+998), c-MAF_3226 (+131360)                                                                                                                                                                                                                                                                                   |
| <i>BCAS1</i>    | c-MAF_6578 (+170777), c-MAF_3688 (+177044)                                                                                                                                                                                                                                                                                |
| <i>BCAT1</i>    | c-MAF_1333 (-57312), c-MAF_4945 (+1860), c-MAF_541 (+63586), c-MAF_2485 (+148198), c-MAF_1912 (+162346)                                                                                                                                                                                                                   |
| <i>BCAT2</i>    | c-MAF_5781 (+30028)                                                                                                                                                                                                                                                                                                       |
| <i>BCDIN3D</i>  | c-MAF_3739 (+80256)                                                                                                                                                                                                                                                                                                       |
| <i>BCKDHB</i>   | c-MAF_2698 (+57343)                                                                                                                                                                                                                                                                                                       |
| <i>BCL10</i>    | c-MAF_4277 (-21215), c-MAF_3831 (-1960)                                                                                                                                                                                                                                                                                   |
| <i>BCL11B</i>   | c-MAF_858 (-165538)                                                                                                                                                                                                                                                                                                       |
| <i>BCL2</i>     | c-MAF_1653 (+17337), c-MAF_856 (+29139), c-MAF_3374 (+51793), c-MAF_1002 (+66154), c-MAF_3244 (+106544), c-MAF_4163 (+109358), c-MAF_5736 (+120045), c-MAF_124 (+160261)                                                                                                                                                  |
| <i>BCL2A1</i>   | c-MAF_5116 (-62261), c-MAF_4508 (-39815), c-MAF_3643 (+105), c-MAF_1078 (+3637)                                                                                                                                                                                                                                           |
| <i>BCL2L1</i>   | c-MAF_3801 (+23500), c-MAF_2521 (+47662)                                                                                                                                                                                                                                                                                  |
| <i>BCL2L10</i>  | c-MAF_1523 (+91514)                                                                                                                                                                                                                                                                                                       |
| <i>BCL2L11</i>  | c-MAF_2913 (-9329), c-MAF_214 (-4739)                                                                                                                                                                                                                                                                                     |
| <i>BCL2L13</i>  | c-MAF_3747 (+128980)                                                                                                                                                                                                                                                                                                      |
| <i>BCL2L14</i>  | c-MAF_3874 (-111957), c-MAF_1327 (-89739), c-MAF_19 (-60097)                                                                                                                                                                                                                                                              |
| <i>BCL2L2</i>   | c-MAF_4624 (-4965)                                                                                                                                                                                                                                                                                                        |
| <i>BCL3</i>     | c-MAF_1444 (+4959)                                                                                                                                                                                                                                                                                                        |
| <i>BCL6</i>     | c-MAF_4999 (-183636), c-MAF_1133 (-177610), c-MAF_6030 (-173617), c-MAF_6453 (+134)                                                                                                                                                                                                                                       |
| <i>BCL9</i>     | c-MAF_2532 (+88197)                                                                                                                                                                                                                                                                                                       |
| <i>BCOR</i>     | c-MAF_3494 (-78111)                                                                                                                                                                                                                                                                                                       |
| <i>BDHI</i>     | c-MAF_1428 (+135653), c-MAF_4980 (+161276)                                                                                                                                                                                                                                                                                |

|                |                                                                                                                                                                                           |
|----------------|-------------------------------------------------------------------------------------------------------------------------------------------------------------------------------------------|
| <i>BEANI</i>   | c-MAF_6649 (+30889), c-MAF_2755 (+95053), c-MAF_2763 (+112620)                                                                                                                            |
| <i>BEGAIN</i>  | c-MAF_1245 (-72656)                                                                                                                                                                       |
| <i>BET1L</i>   | c-MAF_2750 (-1507)                                                                                                                                                                        |
| <i>BFAR</i>    | c-MAF_4913 (-2403)                                                                                                                                                                        |
| <i>BFSP2</i>   | c-MAF_5617 (+23527), c-MAF_2101 (+106421)                                                                                                                                                 |
| <i>BGLAP</i>   | c-MAF_2828 (-18866)                                                                                                                                                                       |
| <i>BHLHE22</i> | c-MAF_66 (+176540)                                                                                                                                                                        |
| <i>BHLHE40</i> | c-MAF_3504 (-147913), c-MAF_2006 (-128035), c-MAF_5753 (-80440), c-MAF_6618 (-70224), c-MAF_520 (-1408), c-MAF_1579 (+7959), c-MAF_4852 (+80823), c-MAF_1972 (+133161)                    |
| <i>BHMT</i>    | c-MAF_3687 (+117974)                                                                                                                                                                      |
| <i>BICD1</i>   | c-MAF_280 (-148073), c-MAF_5952 (+13239)                                                                                                                                                  |
| <i>BID</i>     | c-MAF_3747 (+6446)                                                                                                                                                                        |
| <i>BIK</i>     | c-MAF_5281 (-6516)                                                                                                                                                                        |
| <i>BIN1</i>    | c-MAF_307 (+81451)                                                                                                                                                                        |
| <i>BIRC2</i>   | c-MAF_4381 (-322)                                                                                                                                                                         |
| <i>BIRC3</i>   | c-MAF_2230 (-12545)                                                                                                                                                                       |
| <i>BLK</i>     | c-MAF_6227 (-71939), c-MAF_106 (+64921)                                                                                                                                                   |
| <i>BLM</i>     | c-MAF_5637 (-55907), c-MAF_6547 (-30491), c-MAF_1942 (+90596), c-MAF_153 (+98134), c-MAF_61 (+112841), c-MAF_615 (+120920), c-MAF_2544 (+127988), c-MAF_110 (+135620), c-MAF_57 (+139613) |
| <i>BLMH</i>    | c-MAF_1062 (+72)                                                                                                                                                                          |
| <i>BLOC1S5</i> | c-MAF_2033 (-1142), c-MAF_3127 (+143754)                                                                                                                                                  |
| <i>BLOC1S6</i> | c-MAF_531 (+862)                                                                                                                                                                          |
| <i>BLVRA</i>   | c-MAF_6038 (-88811), c-MAF_4578 (-80151)                                                                                                                                                  |
| <i>BMF</i>     | c-MAF_4173 (+60957)                                                                                                                                                                       |
| <i>BMP10</i>   | c-MAF_1186 (+104883), c-MAF_5464 (+117853)                                                                                                                                                |
| <i>BPIFB1</i>  | c-MAF_4872 (+67886), c-MAF_354 (+86531)                                                                                                                                                   |
| <i>BRCA2</i>   | c-MAF_1746 (-162310), c-MAF_6198 (+112699), c-MAF_2352 (+137822), c-MAF_335 (+156920)                                                                                                     |
| <i>BRD1</i>    | c-MAF_283 (-14408), c-MAF_5189 (-5715)                                                                                                                                                    |
| <i>BRD2</i>    | c-MAF_1692 (-493)                                                                                                                                                                         |
| <i>BRD4</i>    | c-MAF_4761 (-37719), c-MAF_5561 (-23730), c-MAF_5580 (-20362)                                                                                                                             |
| <i>BRD7</i>    | c-MAF_1848 (+29610), c-MAF_4175 (+100899)                                                                                                                                                 |
| <i>BRE</i>     | c-MAF_3984 (-80862), c-MAF_4485 (-33421)                                                                                                                                                  |
| <i>BRF2</i>    | c-MAF_1001 (-44163)                                                                                                                                                                       |
| <i>BRIP1</i>   | c-MAF_5851 (+86154)                                                                                                                                                                       |
| <i>BRMS1L</i>  | c-MAF_3253 (+106454)                                                                                                                                                                      |
| <i>BRWD1</i>   | c-MAF_5444 (-33259)                                                                                                                                                                       |
| <i>BSPRY</i>   | c-MAF_2573 (+1504)                                                                                                                                                                        |
| <i>BST1</i>    | c-MAF_3837 (+53421)                                                                                                                                                                       |
| <i>BSX</i>     | c-MAF_2203 (+125039)                                                                                                                                                                      |
| <i>BTA1F1</i>  | c-MAF_5663 (+32), c-MAF_506 (+21251), c-MAF_111 (+177765)                                                                                                                                 |
| <i>BTG1</i>    | c-MAF_871 (-62801), c-MAF_6098 (+11825)                                                                                                                                                   |
| <i>BTG2</i>    | c-MAF_2465 (-32194), c-MAF_765 (-17982), c-MAF_1260 (-556)                                                                                                                                |
| <i>BTG3</i>    | c-MAF_2397 (-182536), c-MAF_903 (-172115), c-MAF_6228 (-164586)                                                                                                                           |
| <i>BTG4</i>    | c-MAF_4878 (+98294)                                                                                                                                                                       |
| <i>BTN2A2</i>  | c-MAF_3230 (-4711)                                                                                                                                                                        |
| <i>BTN3A2</i>  | c-MAF_6504 (-68634), c-MAF_5967 (-60311)                                                                                                                                                  |

|                  |                                                                                                        |
|------------------|--------------------------------------------------------------------------------------------------------|
| <i>BUB3</i>      | c-MAF_2041 (+1972), c-MAF_3506 (+133624)                                                               |
| <i>BUD31</i>     | c-MAF_1006 (-27459)                                                                                    |
| <i>BZRAP1</i>    | c-MAF_411 (-16497)                                                                                     |
| <i>BZW1</i>      | c-MAF_4593 (-99038), c-MAF_5515 (-46618), c-MAF_1063 (-24878), c-MAF_5399 (+50412)                     |
| <i>BZW2</i>      | c-MAF_2386 (+65781)                                                                                    |
| <i>C10orf105</i> | c-MAF_2297 (-49682), c-MAF_6672 (-28576), c-MAF_566 (-17514), c-MAF_2149 (-6617), c-MAF_3067 (+118754) |
| <i>C10orf11</i>  | c-MAF_5103 (-18227)                                                                                    |
| <i>C10orf128</i> | c-MAF_5335 (+10791)                                                                                    |
| <i>C10orf54</i>  | c-MAF_3806 (-310), c-MAF_2297 (+3995), c-MAF_6672 (+25101), c-MAF_566 (+36163), c-MAF_2149 (+47060)    |
| <i>C10orf90</i>  | c-MAF_1815 (-142118), c-MAF_3641 (+123621)                                                             |
| <i>C11orf30</i>  | c-MAF_1985 (+107346), c-MAF_494 (+119977), c-MAF_5439 (+182711)                                        |
| <i>C11orf34</i>  | c-MAF_5120 (-36569)                                                                                    |
| <i>C11orf44</i>  | c-MAF_5727 (-41684), c-MAF_2246 (-26176)                                                               |
| <i>C11orf49</i>  | c-MAF_3522 (+11753)                                                                                    |
| <i>C11orf58</i>  | c-MAF_5476 (+11562), c-MAF_2245 (+163843)                                                              |
| <i>C11orf73</i>  | c-MAF_4354 (-14968)                                                                                    |
| <i>C11orf82</i>  | c-MAF_6114 (+58438)                                                                                    |
| <i>C11orf83</i>  | c-MAF_3677 (+1491)                                                                                     |
| <i>C11orf92</i>  | c-MAF_234 (-71684), c-MAF_2268 (-66474), c-MAF_2194 (-54254)                                           |
| <i>C12orf10</i>  | c-MAF_2240 (+668)                                                                                      |
| <i>C12orf23</i>  | c-MAF_2589 (-40551)                                                                                    |
| <i>C12orf49</i>  | c-MAF_6696 (+64779)                                                                                    |
| <i>C12orf57</i>  | c-MAF_4519 (-192)                                                                                      |
| <i>C12orf76</i>  | c-MAF_574 (+11973), c-MAF_4952 (+28500), c-MAF_3661 (+30811)                                           |
| <i>C14orf159</i> | c-MAF_6096 (-45449), c-MAF_172 (+115602), c-MAF_1767 (+127592)                                         |
| <i>C14orf37</i>  | c-MAF_2440 (+181898)                                                                                   |
| <i>C15orf48</i>  | c-MAF_1294 (+26275)                                                                                    |
| <i>C15orf60</i>  | c-MAF_5556 (+142147)                                                                                   |
| <i>C15orf61</i>  | c-MAF_3105 (+308)                                                                                      |
| <i>C16orf54</i>  | c-MAF_895 (+43541)                                                                                     |
| <i>C16orf70</i>  | c-MAF_1749 (-54058)                                                                                    |
| <i>C16orf87</i>  | c-MAF_3642 (+1635)                                                                                     |
| <i>C17orf67</i>  | c-MAF_2014 (+46525)                                                                                    |
| <i>C17orf75</i>  | c-MAF_3513 (+11813)                                                                                    |
| <i>C17orf99</i>  | c-MAF_18 (+8820), c-MAF_1043 (+13448)                                                                  |
| <i>C18orf25</i>  | c-MAF_3889 (-177), c-MAF_5187 (+37905)                                                                 |
| <i>C18orf8</i>   | c-MAF_117 (+70524)                                                                                     |
| <i>C19orf12</i>  | c-MAF_5527 (-465), c-MAF_483 (+23956), c-MAF_1075 (+27330), c-MAF_2838 (+43439)                        |
| <i>C19orf77</i>  | c-MAF_1392 (+95577)                                                                                    |
| <i>CIGALT1</i>   | c-MAF_2503 (-431)                                                                                      |
| <i>CIGALTIC1</i> | c-MAF_5203 (+1456)                                                                                     |
| <i>CIQL1</i>     | c-MAF_6089 (-4265)                                                                                     |
| <i>CIQTNF2</i>   | c-MAF_294 (+31031)                                                                                     |
| <i>CIQTNF5</i>   | c-MAF_6765 (-14586)                                                                                    |

|                     |                                                                                                                                                 |
|---------------------|-------------------------------------------------------------------------------------------------------------------------------------------------|
| <i>C1QTNF9</i>      | c-MAF_5704 (-138602), c-MAF_4403 (-55475), c-MAF_3884 (-52652), c-MAF_121 (-36336), c-MAF_1397 (-32528)                                         |
| <i>C1orf159</i>     | c-MAF_4301 (+16191)                                                                                                                             |
| <i>C1orf162</i>     | c-MAF_2148 (+2048)                                                                                                                              |
| <i>C1orf174</i>     | c-MAF_6573 (-423)                                                                                                                               |
| <i>C1orf185</i>     | c-MAF_626 (-133398)                                                                                                                             |
| <i>C1orf191</i>     | c-MAF_2689 (-7203)                                                                                                                              |
| <i>C1orf86</i>      | c-MAF_4372 (+60544)                                                                                                                             |
| <i>C1orf95</i>      | c-MAF_261 (+114406), c-MAF_3891 (+138740), c-MAF_4225 (+179745)                                                                                 |
| <i>C20orf24</i>     | c-MAF_852 (-23324)                                                                                                                              |
| <i>C21orf33</i>     | c-MAF_6697 (+62762), c-MAF_3310 (+87343)                                                                                                        |
| <i>C22orf29</i>     | c-MAF_5651 (-804)                                                                                                                               |
| <i>C22orf46</i>     | c-MAF_2196 (-1755)                                                                                                                              |
| <i>C2CD2</i>        | c-MAF_2306 (-48718)                                                                                                                             |
| <i>C2CD3</i>        | c-MAF_123 (+80243), c-MAF_4700 (+150898)                                                                                                        |
| <i>C2CD4A</i>       | c-MAF_3707 (-31169), c-MAF_6493 (+21143), c-MAF_691 (+32288), c-MAF_1023 (+43818), c-MAF_2118 (+52628), c-MAF_276 (+55469), c-MAF_5190 (+74853) |
| <i>C2CD4B</i>       | c-MAF_5190 (+23453), c-MAF_276 (+42837), c-MAF_2118 (+45678), c-MAF_1023 (+54488), c-MAF_691 (+66018), c-MAF_6493 (+77163)                      |
| <i>C2orf40</i>      | c-MAF_946 (-138156)                                                                                                                             |
| <i>C2orf71</i>      | c-MAF_5440 (+14445), c-MAF_1895 (+59156)                                                                                                        |
| <i>C2orf82</i>      | c-MAF_6229 (-30990)                                                                                                                             |
| <i>C3AR1</i>        | c-MAF_428 (+73), c-MAF_6337 (+8347)                                                                                                             |
| <i>C4orf26</i>      | c-MAF_4333 (-118), c-MAF_182 (+42419)                                                                                                           |
| <i>C4orf32</i>      | c-MAF_3931 (+22636)                                                                                                                             |
| <i>C5</i>           | c-MAF_1325 (+113734)                                                                                                                            |
| <i>C5AR1</i>        | c-MAF_3412 (+5524)                                                                                                                              |
| <i>C5AR2</i>        | c-MAF_3412 (-16749), c-MAF_5025 (-1492)                                                                                                         |
| <i>C5orf30</i>      | c-MAF_5220 (-50860), c-MAF_4215 (+82434)                                                                                                        |
| <i>C5orf50</i>      | c-MAF_6488 (-125262)                                                                                                                            |
| <i>C5orf55</i>      | c-MAF_4299 (+31251), c-MAF_6775 (+50414)                                                                                                        |
| <i>C5orf64</i>      | c-MAF_3718 (-58570)                                                                                                                             |
| <i>C6orf106</i>     | c-MAF_4702 (+32303), c-MAF_4774 (+40223)                                                                                                        |
| <i>C6orf15</i>      | c-MAF_5963 (+54100)                                                                                                                             |
| <i>C6orf203</i>     | c-MAF_2640 (+33401)                                                                                                                             |
| <i>C6orf57</i>      | c-MAF_4788 (-167559)                                                                                                                            |
| <i>C6orf89</i>      | c-MAF_4699 (+26946)                                                                                                                             |
| <i>C7orf13</i>      | c-MAF_6103 (+16338)                                                                                                                             |
| <i>C7orf49</i>      | c-MAF_6379 (+942), c-MAF_5762 (+10422)                                                                                                          |
| <i>C7orf55</i>      | c-MAF_2964 (-330)                                                                                                                               |
| <i>C7orf72</i>      | c-MAF_288 (+169176)                                                                                                                             |
| <i>C8orf4</i>       | c-MAF_6370 (+19575)                                                                                                                             |
| <i>C8orf44-SGK3</i> | c-MAF_3591 (-230), c-MAF_3881 (+12432)                                                                                                          |
| <i>C9orf123</i>     | c-MAF_4072 (-176405)                                                                                                                            |
| <i>C9orf156</i>     | c-MAF_3949 (+15694)                                                                                                                             |
| <i>C9orf16</i>      | c-MAF_2867 (+567), c-MAF_242 (+28066)                                                                                                           |
| <i>C9orf3</i>       | c-MAF_4786 (-90386), c-MAF_1632 (-4522), c-MAF_4746 (+87801), c-MAF_719 (+109791), c-MAF_1952                                                   |



|                 |                                                                                                         |
|-----------------|---------------------------------------------------------------------------------------------------------|
|                 | (+119213), c-MAF_2734 (+149220)                                                                         |
| <i>C9orf69</i>  | c-MAF_708 (+8765)                                                                                       |
| <i>C9orf89</i>  | c-MAF_3722 (-14078)                                                                                     |
| <i>C9orf91</i>  | c-MAF_944 (+79976), c-MAF_6126 (+107746), c-MAF_1469 (+158663)                                          |
| <i>CA10</i>     | c-MAF_4701 (+10673)                                                                                     |
| <i>CA12</i>     | c-MAF_1034 (-116265), c-MAF_6646 (-112423)                                                              |
| <i>CA5A</i>     | c-MAF_4359 (-27113), c-MAF_568 (-19926), c-MAF_4280 (-14697), c-MAF_3943 (+40705), c-MAF_1025 (+61191)  |
| <i>CA6</i>      | c-MAF_1425 (+695)                                                                                       |
| <i>CA7</i>      | c-MAF_1418 (+29052)                                                                                     |
| <i>CAAP1</i>    | c-MAF_5411 (+4294)                                                                                      |
| <i>CAB39</i>    | c-MAF_3735 (-51129), c-MAF_3405 (-27468), c-MAF_4130 (+38434), c-MAF_5285 (+68789), c-MAF_5893 (+83719) |
| <i>CABP7</i>    | c-MAF_1751 (-101718)                                                                                    |
| <i>CABYR</i>    | c-MAF_6024 (-146109), c-MAF_577 (-119040), c-MAF_4327 (-87263)                                          |
| <i>CACNA2D3</i> | c-MAF_5619 (-74109)                                                                                     |
| <i>CACNA2D4</i> | c-MAF_3861 (-75426)                                                                                     |
| <i>CACNB4</i>   | c-MAF_4465 (-35826), c-MAF_5258 (+180615)                                                               |
| <i>CACNG5</i>   | c-MAF_1831 (-121466), c-MAF_5403 (-67710)                                                               |
| <i>CACNG6</i>   | c-MAF_680 (+28101)                                                                                      |
| <i>CACTIN</i>   | c-MAF_4541 (-45099)                                                                                     |
| <i>CACYBP</i>   | c-MAF_1253 (-31483)                                                                                     |
| <i>CADM4</i>    | c-MAF_6583 (-24460)                                                                                     |
| <i>CALM1</i>    | c-MAF_2136 (-13617)                                                                                     |
| <i>CALM3</i>    | c-MAF_3862 (+1961)                                                                                      |
| <i>CALML3</i>   | c-MAF_1038 (+103958)                                                                                    |
| <i>CALML4</i>   | c-MAF_4182 (-616)                                                                                       |
| <i>CAMK1</i>    | c-MAF_1362 (-10058)                                                                                     |
| <i>CAMK1D</i>   | c-MAF_5672 (-147094), c-MAF_5493 (-126960), c-MAF_5597 (+70102), c-MAF_1264 (+99458)                    |
| <i>CAMK2D</i>   | c-MAF_4483 (-23964), c-MAF_2081 (-1781), c-MAF_1989 (+76427)                                            |
| <i>CAMK2G</i>   | c-MAF_2626 (-11781), c-MAF_3616 (+14969)                                                                |
| <i>CAMKK2</i>   | c-MAF_3091 (+73433), c-MAF_304 (+83126)                                                                 |
| <i>CAMSAP1</i>  | c-MAF_3667 (-19794)                                                                                     |
| <i>CAMTA1</i>   | c-MAF_2263 (+133787), c-MAF_3038 (+178241)                                                              |
| <i>CAPG</i>     | c-MAF_6132 (-8144)                                                                                      |
| <i>CAPN12</i>   | c-MAF_5174 (+68590), c-MAF_1114 (+81848)                                                                |
| <i>CAPN6</i>    | c-MAF_502 (+145806)                                                                                     |
| <i>CAPN7</i>    | c-MAF_2812 (-6590), c-MAF_2833 (+69259)                                                                 |
| <i>CAPSL</i>    | c-MAF_5883 (+61051)                                                                                     |
| <i>CAPZB</i>    | c-MAF_4114 (-19695), c-MAF_169 (-10528), c-MAF_6730 (+7592), c-MAF_5254 (+36806), c-MAF_728 (+86906)    |
| <i>CARD11</i>   | c-MAF_5359 (-71294), c-MAF_5933 (-22171), c-MAF_2198 (+32294)                                           |
| <i>CARD6</i>    | c-MAF_2093 (+374)                                                                                       |
| <i>CARD8</i>    | c-MAF_2283 (-14755)                                                                                     |
| <i>CARHSP1</i>  | c-MAF_2844 (-86744), c-MAF_6105 (-80582), c-MAF_2777 (-60178), c-MAF_3956 (-23519), c-MAF_6641 (+51126) |
| <i>CARKD</i>    | c-MAF_5559 (+61312)                                                                                     |
| <i>CARS</i>     | c-MAF_4766 (+7536), c-MAF_833 (+42892), c-MAF_874 (+46235)                                              |

|                 |                                                                                                                             |
|-----------------|-----------------------------------------------------------------------------------------------------------------------------|
| <i>CARS2</i>    | c-MAF_5559 (+29184)                                                                                                         |
| <i>CARTPT</i>   | c-MAF_3924 (+131795)                                                                                                        |
| <i>CASC3</i>    | c-MAF_1994 (+318), c-MAF_3068 (+13137)                                                                                      |
| <i>CASD1</i>    | c-MAF_4623 (+1172)                                                                                                          |
| <i>CASK</i>     | c-MAF_4410 (-184706), c-MAF_5577 (+3587)                                                                                    |
| <i>CASP12</i>   | c-MAF_5193 (+1000)                                                                                                          |
| <i>CASP3</i>    | c-MAF_3965 (+74323), c-MAF_6065 (+75611), c-MAF_393 (+135265)                                                               |
| <i>CASP4</i>    | c-MAF_4713 (+850)                                                                                                           |
| <i>CASP6</i>    | c-MAF_6512 (+800)                                                                                                           |
| <i>CASP8</i>    | c-MAF_605 (+4960)                                                                                                           |
| <i>CASQ2</i>    | c-MAF_5408 (+119568)                                                                                                        |
| <i>CASR</i>     | c-MAF_3953 (-81847), c-MAF_69 (-37587), c-MAF_466 (+71632), c-MAF_3209 (+114127)                                            |
| <i>CASS4</i>    | c-MAF_2618 (+2928), c-MAF_2211 (+10352), c-MAF_4184 (+17481), c-MAF_6072 (+21708), c-MAF_374 (+42818)                       |
| <i>CAST</i>     | c-MAF_4053 (-124626)                                                                                                        |
| <i>CAT</i>      | c-MAF_2092 (-67292)                                                                                                         |
| <i>CATSPER1</i> | c-MAF_6346 (+8859)                                                                                                          |
| <i>CATSPERD</i> | c-MAF_5885 (-215)                                                                                                           |
| <i>CBFA2T2</i>  | c-MAF_3606 (-7127), c-MAF_4808 (+62177)                                                                                     |
| <i>CBFA2T3</i>  | c-MAF_6538 (-43237)                                                                                                         |
| <i>CBFB</i>     | c-MAF_1749 (+26685)                                                                                                         |
| <i>CBLB</i>     | c-MAF_5605 (-145099), c-MAF_4780 (-142014), c-MAF_1684 (-135568), c-MAF_2271 (+32279), c-MAF_688 (+38678)                   |
| <i>CBLC</i>     | c-MAF_1444 (-24363)                                                                                                         |
| <i>CBX3</i>     | c-MAF_1724 (-3489)                                                                                                          |
| <i>CCDC130</i>  | c-MAF_5494 (-374)                                                                                                           |
| <i>CCDC134</i>  | c-MAF_2730 (-29417), c-MAF_3708 (+27275)                                                                                    |
| <i>CCDC167</i>  | c-MAF_3385 (-46642), c-MAF_5449 (-17767)                                                                                    |
| <i>CCDC180</i>  | c-MAF_1666 (-71649), c-MAF_4796 (+158932)                                                                                   |
| <i>CCDC41</i>   | c-MAF_779 (-180816), c-MAF_1022 (+154166)                                                                                   |
| <i>CCDC53</i>   | c-MAF_3958 (+2756)                                                                                                          |
| <i>CCDC64</i>   | c-MAF_5524 (-1173)                                                                                                          |
| <i>CCDC8</i>    | c-MAF_6122 (-109494), c-MAF_5550 (+63347)                                                                                   |
| <i>CCDC80</i>   | c-MAF_2645 (-132974), c-MAF_2261 (-33237)                                                                                   |
| <i>CCDC88C</i>  | c-MAF_3648 (+1604), c-MAF_5142 (+29244), c-MAF_964 (+46489), c-MAF_5813 (+55227), c-MAF_3890 (+66807), c-MAF_5613 (+156480) |
| <i>CCDC91</i>   | c-MAF_6551 (+31775), c-MAF_4583 (+63002)                                                                                    |
| <i>CCDC92</i>   | c-MAF_4520 (+34984)                                                                                                         |
| <i>CCIN</i>     | c-MAF_6249 (-17446)                                                                                                         |
| <i>CCLI</i>     | c-MAF_1218 (-24179), c-MAF_6505 (-19682)                                                                                    |
| <i>CCL18</i>    | c-MAF_4031 (+2389), c-MAF_2697 (+8408), c-MAF_4502 (+21670)                                                                 |
| <i>CCL20</i>    | c-MAF_282 (-38490), c-MAF_6025 (-25117), c-MAF_1721 (+34966), c-MAF_3200 (+49682)                                           |
| <i>CCL26</i>    | c-MAF_2746 (+13149)                                                                                                         |
| <i>CCL3</i>     | c-MAF_3069 (-2438), c-MAF_1339 (-308), c-MAF_4502 (+4177), c-MAF_2697 (+17439), c-MAF_4031 (+23458)                         |
| <i>CCL5</i>     | c-MAF_4318 (-63)                                                                                                            |
| <i>CCNAI</i>    | c-MAF_2450 (-14085)                                                                                                         |
| <i>CCNB3</i>    | c-MAF_3704 (-163)                                                                                                           |

|                 |                                                                                                                                                      |
|-----------------|------------------------------------------------------------------------------------------------------------------------------------------------------|
| <i>CCND2</i>    | c-MAF_1459 (-154258), c-MAF_3908 (-132178), c-MAF_2459 (-4185)                                                                                       |
| <i>CCND3</i>    | c-MAF_5106 (-80416), c-MAF_3082 (-26240), c-MAF_5071 (-20022), c-MAF_5307 (-16915), c-MAF_2895 (-315)                                                |
| <i>CCNE2</i>    | c-MAF_3529 (-32343)                                                                                                                                  |
| <i>CCNG2</i>    | c-MAF_5062 (-10451)                                                                                                                                  |
| <i>CCNI</i>     | c-MAF_5062 (-70695), c-MAF_811 (-536), c-MAF_5321 (+49815), c-MAF_3736 (+91049)                                                                      |
| <i>CCNJ</i>     | c-MAF_1258 (-181947)                                                                                                                                 |
| <i>CCNJL</i>    | c-MAF_294 (-27010)                                                                                                                                   |
| <i>CCNK</i>     | c-MAF_3830 (-1475)                                                                                                                                   |
| <i>CCNLI</i>    | c-MAF_5590 (+56741), c-MAF_3260 (+71306)                                                                                                             |
| <i>CCNY</i>     | c-MAF_4247 (-145267), c-MAF_518 (-140945), c-MAF_236 (-117291)                                                                                       |
| <i>CCNYL1</i>   | c-MAF_4449 (+11405)                                                                                                                                  |
| <i>CCR1</i>     | c-MAF_1873 (+2947), c-MAF_3406 (+21245), c-MAF_1855 (+78652), c-MAF_2675 (+97482), c-MAF_1098 (+109793), c-MAF_1236 (+139673)                        |
| <i>CCR2</i>     | c-MAF_5264 (-73520), c-MAF_140 (-68624), c-MAF_3864 (-53645), c-MAF_4694 (-48856), c-MAF_597 (-3388), c-MAF_4466 (+376)                              |
| <i>CCR3</i>     | c-MAF_5264 (+37843), c-MAF_140 (+42739), c-MAF_3864 (+57718), c-MAF_4694 (+62507)                                                                    |
| <i>CCR4</i>     | c-MAF_2291 (+24472), c-MAF_6728 (+54571), c-MAF_1707 (+71782), c-MAF_1845 (+95144), c-MAF_5037 (+103733), c-MAF_4166 (+111644), c-MAF_1357 (+116068) |
| <i>CCR5</i>     | c-MAF_576 (+835)                                                                                                                                     |
| <i>CCR6</i>     | c-MAF_1696 (-66164), c-MAF_1584 (-31138)                                                                                                             |
| <i>CCR7</i>     | c-MAF_6088 (+48606)                                                                                                                                  |
| <i>CCR9</i>     | c-MAF_5653 (-21635), c-MAF_551 (+29515), c-MAF_6574 (+52612)                                                                                         |
| <i>CCRN4L</i>   | c-MAF_5018 (-161)                                                                                                                                    |
| <i>CCSAP</i>    | c-MAF_3918 (+2302)                                                                                                                                   |
| <i>CCSER2</i>   | c-MAF_6224 (+654)                                                                                                                                    |
| <i>CCT2</i>     | c-MAF_1300 (-50721)                                                                                                                                  |
| <i>CCT5</i>     | c-MAF_5539 (+38644)                                                                                                                                  |
| <i>CD109</i>    | c-MAF_745 (-28364), c-MAF_2919 (-331), c-MAF_5873 (+8363), c-MAF_5583 (+93177)                                                                       |
| <i>CD180</i>    | c-MAF_810 (-24948), c-MAF_3179 (-19423), c-MAF_3133 (-10257), c-MAF_1496 (+8088), c-MAF_2545 (+66850), c-MAF_4197 (+131504), c-MAF_213 (+166171)     |
| <i>CD2</i>      | c-MAF_88 (-16397), c-MAF_1718 (+45019), c-MAF_1613 (+49621), c-MAF_2816 (+60742)                                                                     |
| <i>CD200R1</i>  | c-MAF_1432 (+16096)                                                                                                                                  |
| <i>CD200R1L</i> | c-MAF_1432 (-113076), c-MAF_2645 (+71707), c-MAF_2261 (+171444)                                                                                      |
| <i>CD226</i>    | c-MAF_1637 (-2391), c-MAF_572 (+11660), c-MAF_3344 (+21372), c-MAF_4857 (+66296)                                                                     |
| <i>CD247</i>    | c-MAF_699 (+18971), c-MAF_5509 (+105322)                                                                                                             |
| <i>CD248</i>    | c-MAF_4068 (-1514)                                                                                                                                   |
| <i>CD274</i>    | c-MAF_1193 (+43316)                                                                                                                                  |
| <i>CD276</i>    | c-MAF_716 (+12961)                                                                                                                                   |
| <i>CD28</i>     | c-MAF_535 (-25), c-MAF_3120 (+23481), c-MAF_2160 (+34623), c-MAF_2707 (+105507), c-MAF_56 (+123987), c-MAF_634 (+129786), c-MAF_3 (+151232)          |
| <i>CD2BP2</i>   | c-MAF_819 (+4720)                                                                                                                                    |
| <i>CD300A</i>   | c-MAF_4304 (+46289)                                                                                                                                  |
| <i>CD300LB</i>  | c-MAF_4304 (+18761)                                                                                                                                  |
| <i>CD300LF</i>  | c-MAF_498 (-17844)                                                                                                                                   |
| <i>CD33</i>     | c-MAF_3966 (+21163)                                                                                                                                  |
| <i>CD34</i>     | c-MAF_758 (+95376)                                                                                                                                   |
| <i>CD38</i>     | c-MAF_3837 (-21907)                                                                                                                                  |
| <i>CD3D</i>     | c-MAF_1846 (+36012)                                                                                                                                  |

|                 |                                                                                                                                                                                                                               |
|-----------------|-------------------------------------------------------------------------------------------------------------------------------------------------------------------------------------------------------------------------------|
| <i>CD3E</i>     | c-MAF_1846 (+2187)                                                                                                                                                                                                            |
| <i>CD4</i>      | c-MAF_936 (-170)                                                                                                                                                                                                              |
| <i>CD40LG</i>   | c-MAF_2370 (-71011), c-MAF_3161 (-62744), c-MAF_2709 (-49317), c-MAF_892 (-28089), c-MAF_195 (-21800), c-MAF_178 (-12807), c-MAF_3308 (-8623), c-MAF_2563 (-5417), c-MAF_1756 (-69), c-MAF_4387 (+23298), c-MAF_2097 (+99590) |
| <i>CD44</i>     | c-MAF_5630 (-132132), c-MAF_1086 (-109074), c-MAF_4272 (-98772), c-MAF_868 (-61145), c-MAF_3572 (+7126), c-MAF_460 (+26872)                                                                                                   |
| <i>CD46</i>     | c-MAF_758 (+63969)                                                                                                                                                                                                            |
| <i>CD47</i>     | c-MAF_3276 (-33566), c-MAF_5782 (+102365)                                                                                                                                                                                     |
| <i>CD48</i>     | c-MAF_3976 (+26317), c-MAF_4560 (+28559), c-MAF_5168 (+38520), c-MAF_2778 (+45939)                                                                                                                                            |
| <i>CD5</i>      | c-MAF_6521 (-123432), c-MAF_3597 (-116069)                                                                                                                                                                                    |
| <i>CD58</i>     | c-MAF_82 (+26260), c-MAF_4450 (+33364), c-MAF_972 (+55688), c-MAF_1733 (+66604), c-MAF_4740 (+180665)                                                                                                                         |
| <i>CD59</i>     | c-MAF_3301 (-17085), c-MAF_4880 (+902), c-MAF_5058 (+13568), c-MAF_6698 (+45910)                                                                                                                                              |
| <i>CD6</i>      | c-MAF_6521 (+7283), c-MAF_3597 (+14646)                                                                                                                                                                                       |
| <i>CD69</i>     | c-MAF_5270 (-32519), c-MAF_890 (+18952)                                                                                                                                                                                       |
| <i>CD7</i>      | c-MAF_726 (+19846)                                                                                                                                                                                                            |
| <i>CD70</i>     | c-MAF_6269 (-70757), c-MAF_2902 (-63863), c-MAF_3240 (-48553), c-MAF_3229 (-7559)                                                                                                                                             |
| <i>CD72</i>     | c-MAF_5178 (-16592), c-MAF_1971 (-267)                                                                                                                                                                                        |
| <i>CD80</i>     | c-MAF_2510 (+17799), c-MAF_2034 (+51170)                                                                                                                                                                                      |
| <i>CD82</i>     | c-MAF_3988 (+3812), c-MAF_616 (+7753)                                                                                                                                                                                         |
| <i>CD83</i>     | c-MAF_1178 (+153489), c-MAF_2685 (+159527)                                                                                                                                                                                    |
| <i>CD84</i>     | c-MAF_4610 (+3031), c-MAF_2661 (+11222), c-MAF_5150 (+20906)                                                                                                                                                                  |
| <i>CD86</i>     | c-MAF_3953 (+47113), c-MAF_69 (+91373)                                                                                                                                                                                        |
| <i>CD93</i>     | c-MAF_6119 (-62347), c-MAF_2115 (-56865)                                                                                                                                                                                      |
| <i>CD96</i>     | c-MAF_1026 (+26)                                                                                                                                                                                                              |
| <i>CD97</i>     | c-MAF_6441 (-27757)                                                                                                                                                                                                           |
| <i>CDC14A</i>   | c-MAF_6015 (-884), c-MAF_2299 (+89402)                                                                                                                                                                                        |
| <i>CDC14B</i>   | c-MAF_3798 (+140711)                                                                                                                                                                                                          |
| <i>CDC16</i>    | c-MAF_1964 (+34136)                                                                                                                                                                                                           |
| <i>CDC25B</i>   | c-MAF_1239 (+2330), c-MAF_3174 (+15540)                                                                                                                                                                                       |
| <i>CDC37</i>    | c-MAF_1270 (-5233)                                                                                                                                                                                                            |
| <i>CDC42BPG</i> | c-MAF_1334 (-20075), c-MAF_3254 (-15026)                                                                                                                                                                                      |
| <i>CDC42EP3</i> | c-MAF_1000 (-161415), c-MAF_2715 (+26550), c-MAF_4392 (+36441), c-MAF_844 (+85810)                                                                                                                                            |
| <i>CDC42SE2</i> | c-MAF_2738 (-10985), c-MAF_1309 (-5878), c-MAF_4401 (+115714), c-MAF_5489 (+130261)                                                                                                                                           |
| <i>CDC6</i>     | c-MAF_3205 (-3759), c-MAF_1635 (+8545)                                                                                                                                                                                        |
| <i>CDC7</i>     | c-MAF_769 (+55199), c-MAF_5639 (+90216)                                                                                                                                                                                       |
| <i>CDCA3</i>    | c-MAF_3140 (-429)                                                                                                                                                                                                             |
| <i>CDCA4</i>    | c-MAF_3051 (+16929)                                                                                                                                                                                                           |
| <i>CDCA7L</i>   | c-MAF_2667 (-171325), c-MAF_4101 (-157724)                                                                                                                                                                                    |
| <i>CDCP1</i>    | c-MAF_4579 (-21071)                                                                                                                                                                                                           |
| <i>CDCP2</i>    | c-MAF_6375 (+74479)                                                                                                                                                                                                           |
| <i>CDH13</i>    | c-MAF_2234 (+28567), c-MAF_188 (+174657)                                                                                                                                                                                      |
| <i>CDH17</i>    | c-MAF_1544 (+136675)                                                                                                                                                                                                          |
| <i>CDH26</i>    | c-MAF_6774 (+100061)                                                                                                                                                                                                          |
| <i>CDH4</i>     | c-MAF_3902 (-91920)                                                                                                                                                                                                           |
| <i>CDHR3</i>    | c-MAF_5309 (-113643)                                                                                                                                                                                                          |

|                 |                                                                                                                                 |
|-----------------|---------------------------------------------------------------------------------------------------------------------------------|
| <i>CDHR5</i>    | c-MAF_5060 (-2707)                                                                                                              |
| <i>CDIP1</i>    | c-MAF_4837 (-14414), c-MAF_2631 (+32758)                                                                                        |
| <i>CDK1</i>     | c-MAF_2929 (-64068)                                                                                                             |
| <i>CDK13</i>    | c-MAF_6279 (-748)                                                                                                               |
| <i>CDK17</i>    | c-MAF_1858 (-84819), c-MAF_1451 (-45421), c-MAF_5520 (-24946), c-MAF_2504 (+1337), c-MAF_857 (+56877)                           |
| <i>CDK19</i>    | c-MAF_149 (-774)                                                                                                                |
| <i>CDK20</i>    | c-MAF_4534 (-32609)                                                                                                             |
| <i>CDK5R1</i>   | c-MAF_5712 (+33087)                                                                                                             |
| <i>CDK5RAP1</i> | c-MAF_354 (+31895), c-MAF_4872 (+50540)                                                                                         |
| <i>CDK6</i>     | c-MAF_6754 (-70570), c-MAF_3488 (-21153), c-MAF_76 (+24005), c-MAF_1037 (+102018), c-MAF_5152 (+169401)                         |
| <i>CDK9</i>     | c-MAF_2761 (+2822)                                                                                                              |
| <i>CDKAL1</i>   | c-MAF_2789 (-130576)                                                                                                            |
| <i>CDKL1</i>    | c-MAF_1173 (-1416)                                                                                                              |
| <i>CDKL2</i>    | c-MAF_4340 (-41650), c-MAF_3481 (-24951), c-MAF_182 (+32206)                                                                    |
| <i>CDKL4</i>    | c-MAF_4109 (-160952), c-MAF_5081 (-127840), c-MAF_1014 (+12506), c-MAF_2114 (+87305), c-MAF_1110 (+92427), c-MAF_1395 (+100359) |
| <i>CDKN1B</i>   | c-MAF_1939 (-18781)                                                                                                             |
| <i>CDKN2A</i>   | c-MAF_3220 (-12111), c-MAF_6246 (+9725)                                                                                         |
| <i>CDKN2B</i>   | c-MAF_6715 (-138954), c-MAF_6195 (-56396), c-MAF_2634 (-43551), c-MAF_3220 (+22386)                                             |
| <i>CDKN2C</i>   | c-MAF_626 (+8091)                                                                                                               |
| <i>CDNF</i>     | c-MAF_4427 (+94), c-MAF_388 (+178276)                                                                                           |
| <i>CDR2</i>     | c-MAF_775 (+76208)                                                                                                              |
| <i>CDS1</i>     | c-MAF_6592 (+108508)                                                                                                            |
| <i>CDV3</i>     | c-MAF_5617 (-150208), c-MAF_2101 (-67314), c-MAF_5368 (-355)                                                                    |
| <i>CDYL</i>     | c-MAF_4750 (+152137), c-MAF_6664 (+159235), c-MAF_561 (+165896)                                                                 |
| <i>CDYL2</i>    | c-MAF_629 (-143632), c-MAF_3523 (+44624)                                                                                        |
| <i>CEACAM1</i>  | c-MAF_3941 (+33971)                                                                                                             |
| <i>CEACAM21</i> | c-MAF_1611 (-35658)                                                                                                             |
| <i>CEACAM8</i>  | c-MAF_4618 (-33810)                                                                                                             |
| <i>CEBPA</i>    | c-MAF_1164 (+21859)                                                                                                             |
| <i>CEBPB</i>    | c-MAF_524 (+147792), c-MAF_1706 (+158619)                                                                                       |
| <i>CEBPD</i>    | c-MAF_4542 (+138093), c-MAF_6011 (+164629)                                                                                      |
| <i>CEBPE</i>    | c-MAF_2474 (-43327), c-MAF_893 (-41423), c-MAF_5163 (-1913)                                                                     |
| <i>CECR5</i>    | c-MAF_6112 (+71504)                                                                                                             |
| <i>CEL</i>      | c-MAF_2293 (-13246)                                                                                                             |
| <i>CELF2</i>    | c-MAF_6522 (+127497)                                                                                                            |
| <i>CENPA</i>    | c-MAF_2668 (-16761)                                                                                                             |
| <i>CENPC</i>    | c-MAF_4551 (+22222)                                                                                                             |
| <i>CENPL</i>    | c-MAF_3298 (-825)                                                                                                               |
| <i>CENPM</i>    | c-MAF_3108 (+5916)                                                                                                              |
| <i>CENPN</i>    | c-MAF_1744 (-3488), c-MAF_5035 (+20278)                                                                                         |
| <i>CENPV</i>    | c-MAF_2323 (+65700)                                                                                                             |
| <i>CEP112</i>   | c-MAF_4252 (+192)                                                                                                               |
| <i>CEP135</i>   | c-MAF_5051 (-83437)                                                                                                             |
| <i>CEP152</i>   | c-MAF_3266 (+8690)                                                                                                              |

|                |                                                                                                                                                                                            |
|----------------|--------------------------------------------------------------------------------------------------------------------------------------------------------------------------------------------|
| <i>CEP192</i>  | c-MAF_4613 (+41086)                                                                                                                                                                        |
| <i>CEP290</i>  | c-MAF_6255 (-33)                                                                                                                                                                           |
| <i>CEP44</i>   | c-MAF_5347 (-367)                                                                                                                                                                          |
| <i>CEP68</i>   | c-MAF_6298 (+8725)                                                                                                                                                                         |
| <i>CEP76</i>   | c-MAF_3825 (-141271), c-MAF_486 (-137043)                                                                                                                                                  |
| <i>CEP85L</i>  | c-MAF_564 (-135108), c-MAF_2131 (-3749), c-MAF_3336 (+150952)                                                                                                                              |
| <i>CEP95</i>   | c-MAF_2228 (-1329), c-MAF_4298 (+121540)                                                                                                                                                   |
| <i>CEP97</i>   | c-MAF_4283 (+55062)                                                                                                                                                                        |
| <i>CERK</i>    | c-MAF_1591 (+3122), c-MAF_2260 (+63641), c-MAF_3814 (+76626)                                                                                                                               |
| <i>CERS5</i>   | c-MAF_1547 (-53093), c-MAF_2809 (-46757), c-MAF_930 (-21610)                                                                                                                               |
| <i>CES4A</i>   | c-MAF_2826 (-3637)                                                                                                                                                                         |
| <i>CFDP1</i>   | c-MAF_4871 (+90824)                                                                                                                                                                        |
| <i>CFL2</i>    | c-MAF_1265 (-28192), c-MAF_956 (+47522)                                                                                                                                                    |
| <i>CGGBP1</i>  | c-MAF_1987 (+38071)                                                                                                                                                                        |
| <i>CH25H</i>   | c-MAF_2853 (+43518), c-MAF_4600 (+131020)                                                                                                                                                  |
| <i>CHAF1B</i>  | c-MAF_2325 (+44792)                                                                                                                                                                        |
| <i>CHD1</i>    | c-MAF_5045 (-100879), c-MAF_3251 (-3336)                                                                                                                                                   |
| <i>CHD1L</i>   | c-MAF_4076 (+180)                                                                                                                                                                          |
| <i>CHD2</i>    | c-MAF_458 (-67386)                                                                                                                                                                         |
| <i>CHD7</i>    | c-MAF_3064 (-128761), c-MAF_3367 (-119511), c-MAF_4106 (-115335)                                                                                                                           |
| <i>CHD9</i>    | c-MAF_3542 (+44828)                                                                                                                                                                        |
| <i>CHDH</i>    | c-MAF_1189 (+92525)                                                                                                                                                                        |
| <i>CHGB</i>    | c-MAF_4139 (-68265), c-MAF_1232 (+8887)                                                                                                                                                    |
| <i>CHI3L2</i>  | c-MAF_1937 (+23)                                                                                                                                                                           |
| <i>CHIC1</i>   | c-MAF_2187 (+708)                                                                                                                                                                          |
| <i>CHIT1</i>   | c-MAF_765 (-57883), c-MAF_2465 (-43671)                                                                                                                                                    |
| <i>CHML</i>    | c-MAF_2619 (+18009), c-MAF_64 (+21533)                                                                                                                                                     |
| <i>CHMP2A</i>  | c-MAF_6534 (+8110)                                                                                                                                                                         |
| <i>CHMP6</i>   | c-MAF_6127 (-172236), c-MAF_6158 (-135190), c-MAF_4790 (-127395), c-MAF_3857 (-121326), c-MAF_6295 (-99907), c-MAF_273 (-53138)                                                            |
| <i>CHN1</i>    | c-MAF_1343 (-149599)                                                                                                                                                                       |
| <i>CHODL</i>   | c-MAF_5139 (-91529)                                                                                                                                                                        |
| <i>CHORDC1</i> | c-MAF_4548 (-17055)                                                                                                                                                                        |
| <i>CHP1</i>    | c-MAF_6259 (+50218)                                                                                                                                                                        |
| <i>CHRAC1</i>  | c-MAF_3281 (-46750), c-MAF_1713 (+1344), c-MAF_1782 (+3285), c-MAF_1399 (+32020), c-MAF_6176 (+33743), c-MAF_3593 (+40431), c-MAF_1524 (+61146), c-MAF_197 (+80347), c-MAF_1879 (+85921)   |
| <i>CHRNA2</i>  | c-MAF_1561 (+117135), c-MAF_3056 (+127443), c-MAF_2368 (+153638)                                                                                                                           |
| <i>CHRNA9</i>  | c-MAF_6665 (-134544), c-MAF_52 (-108284), c-MAF_5895 (-51430), c-MAF_935 (-44803), c-MAF_5078 (-25821)                                                                                     |
| <i>CHRN3</i>   | c-MAF_4389 (+400)                                                                                                                                                                          |
| <i>CHST11</i>  | c-MAF_3519 (-232), c-MAF_4027 (+147698)                                                                                                                                                    |
| <i>CHST12</i>  | c-MAF_5898 (+10627)                                                                                                                                                                        |
| <i>CHST14</i>  | c-MAF_5312 (+22475)                                                                                                                                                                        |
| <i>CHST15</i>  | c-MAF_5875 (-127237)                                                                                                                                                                       |
| <i>CHST3</i>   | c-MAF_6053 (+10365)                                                                                                                                                                        |
| <i>CHST7</i>   | c-MAF_4531 (+13715), c-MAF_1988 (+55251), c-MAF_5332 (+149805)                                                                                                                             |
| <i>CHSY1</i>   | c-MAF_6235 (-2860), c-MAF_6378 (+9207), c-MAF_1545 (+45584), c-MAF_15 (+52031), c-MAF_4951 (+63315), c-MAF_6028 (+83617), c-MAF_3119 (+114344), c-MAF_1649 (+124071), c-MAF_3933 (+162122) |

|                |                                                                                                                                                        |
|----------------|--------------------------------------------------------------------------------------------------------------------------------------------------------|
| <i>CHTF8</i>   | c-MAF_444 (-46865), c-MAF_2409 (-34022)                                                                                                                |
| <i>CIITA</i>   | c-MAF_2001 (-1750), c-MAF_4682 (+4466), c-MAF_3562 (+38781), c-MAF_438 (+107485), c-MAF_281 (+110726)                                                  |
| <i>CILP2</i>   | c-MAF_134 (+51700), c-MAF_5454 (+56310), c-MAF_38 (+59798)                                                                                             |
| <i>CISD1</i>   | c-MAF_3042 (+13697)                                                                                                                                    |
| <i>CISD2</i>   | c-MAF_6558 (+21057)                                                                                                                                    |
| <i>CISH</i>    | c-MAF_5416 (+10391), c-MAF_6328 (+38026)                                                                                                               |
| <i>CITED2</i>  | c-MAF_5171 (-159190), c-MAF_4016 (-100245), c-MAF_6481 (-4527), c-MAF_3378 (-963), c-MAF_3727 (+50812)                                                 |
| <i>CLASPI</i>  | c-MAF_618 (-73200), c-MAF_3622 (-456), c-MAF_863 (+118350)                                                                                             |
| <i>CLCA1</i>   | c-MAF_1689 (-38357)                                                                                                                                    |
| <i>CLCA2</i>   | c-MAF_1689 (+5925)                                                                                                                                     |
| <i>CLCN3</i>   | c-MAF_3010 (+207)                                                                                                                                      |
| <i>CLCN4</i>   | c-MAF_1642 (-153088), c-MAF_4203 (-79090), c-MAF_2190 (-74020), c-MAF_5376 (-45759)                                                                    |
| <i>CLDN14</i>  | c-MAF_2325 (+49920)                                                                                                                                    |
| <i>CLDN16</i>  | c-MAF_5612 (+58933)                                                                                                                                    |
| <i>CLDN20</i>  | c-MAF_3480 (-170447), c-MAF_4442 (-156376), c-MAF_5016 (-133423), c-MAF_2009 (-109732), c-MAF_1830 (-92523), c-MAF_4046 (-77921)                       |
| <i>CLDN23</i>  | c-MAF_2716 (-146307), c-MAF_3113 (+95545), c-MAF_386 (+142216), c-MAF_223 (+160112), c-MAF_5824 (+167953), c-MAF_4721 (+170568)                        |
| <i>CLDND1</i>  | c-MAF_5796 (+786)                                                                                                                                      |
| <i>CLDND2</i>  | c-MAF_4210 (-3934)                                                                                                                                     |
| <i>CLEC10A</i> | c-MAF_4316 (+19673)                                                                                                                                    |
| <i>CLEC12A</i> | c-MAF_5366 (-22)                                                                                                                                       |
| <i>CLEC18B</i> | c-MAF_1948 (-142504)                                                                                                                                   |
| <i>CLEC19A</i> | c-MAF_2546 (+8709), c-MAF_4192 (+94941)                                                                                                                |
| <i>CLEC2A</i>  | c-MAF_3387 (+25355)                                                                                                                                    |
| <i>CLEC2D</i>  | c-MAF_470 (-54229), c-MAF_2725 (-18776), c-MAF_3445 (-109)                                                                                             |
| <i>CLEC2L</i>  | c-MAF_4020 (+157148)                                                                                                                                   |
| <i>CLEC3B</i>  | c-MAF_4144 (-14183)                                                                                                                                    |
| <i>CLEC7A</i>  | c-MAF_2542 (+4)                                                                                                                                        |
| <i>CLECL1</i>  | c-MAF_890 (-8650)                                                                                                                                      |
| <i>CLIC4</i>   | c-MAF_2863 (+175095), c-MAF_3273 (+179887)                                                                                                             |
| <i>CLIC5</i>   | c-MAF_2442 (+69078), c-MAF_423 (+156245)                                                                                                               |
| <i>CLIC6</i>   | c-MAF_4851 (-28880)                                                                                                                                    |
| <i>CLINT1</i>  | c-MAF_6188 (-58899), c-MAF_3728 (+878)                                                                                                                 |
| <i>CLK1</i>    | c-MAF_5399 (+1793)                                                                                                                                     |
| <i>CLK3</i>    | c-MAF_666 (-68670)                                                                                                                                     |
| <i>CLUU1</i>   | c-MAF_2549 (+38314), c-MAF_3369 (+70048), c-MAF_5864 (+115492), c-MAF_4591 (+128088), c-MAF_3713 (+133157), c-MAF_2416 (+169987), c-MAF_1326 (+174066) |
| <i>CLNK</i>    | c-MAF_3454 (-42413), c-MAF_5245 (+13230)                                                                                                               |
| <i>CLNS1A</i>  | c-MAF_4856 (+6640)                                                                                                                                     |
| <i>CLOCK</i>   | c-MAF_6161 (-107871)                                                                                                                                   |
| <i>CLPB</i>    | c-MAF_5184 (-59505), c-MAF_1808 (-49249), c-MAF_5504 (+157)                                                                                            |
| <i>CLRN3</i>   | c-MAF_1910 (+14307)                                                                                                                                    |
| <i>CLSTN1</i>  | c-MAF_1423 (+105405)                                                                                                                                   |
| <i>CLTA</i>    | c-MAF_1486 (+667)                                                                                                                                      |
| <i>CLTC</i>    | c-MAF_1398 (-137), c-MAF_409 (+15010)                                                                                                                  |

|                 |                                                                                                                                                         |
|-----------------|---------------------------------------------------------------------------------------------------------------------------------------------------------|
| <i>CMBL</i>     | c-MAF_5539 (+19461)                                                                                                                                     |
| <i>CMCI</i>     | c-MAF_1042 (+85107)                                                                                                                                     |
| <i>CMC2</i>     | c-MAF_1744 (+3388), c-MAF_629 (+58861)                                                                                                                  |
| <i>CMIP</i>     | c-MAF_6745 (+106451), c-MAF_2953 (+150722)                                                                                                              |
| <i>CMKLR1</i>   | c-MAF_1533 (+41017)                                                                                                                                     |
| <i>CMPK1</i>    | c-MAF_2392 (+17798)                                                                                                                                     |
| <i>CMTM8</i>    | c-MAF_1088 (-124854)                                                                                                                                    |
| <i>CNBP</i>     | c-MAF_1295 (-11917)                                                                                                                                     |
| <i>CNDP2</i>    | c-MAF_6135 (-11083)                                                                                                                                     |
| <i>CNGA3</i>    | c-MAF_4690 (+92797)                                                                                                                                     |
| <i>CNIH3</i>    | c-MAF_162 (+7803), c-MAF_6656 (+118941)                                                                                                                 |
| <i>CNKSR3</i>   | c-MAF_1652 (-94771)                                                                                                                                     |
| <i>CNNM2</i>    | c-MAF_3699 (+17871)                                                                                                                                     |
| <i>CNOT11</i>   | c-MAF_4892 (+54158)                                                                                                                                     |
| <i>CNOT2</i>    | c-MAF_5825 (+74983)                                                                                                                                     |
| <i>CNOT6L</i>   | c-MAF_2270 (-35357)                                                                                                                                     |
| <i>CNOT7</i>    | c-MAF_1627 (-888)                                                                                                                                       |
| <i>CNTF</i>     | c-MAF_2840 (+4448)                                                                                                                                      |
| <i>CNTNAP1</i>  | c-MAF_1035 (-4403)                                                                                                                                      |
| <i>CNTROB</i>   | c-MAF_4553 (+23688)                                                                                                                                     |
| <i>COA1</i>     | c-MAF_4578 (-28240), c-MAF_6038 (-19580), c-MAF_1021 (+238)                                                                                             |
| <i>COA5</i>     | c-MAF_4590 (+99656), c-MAF_2360 (+102753), c-MAF_5644 (+128843), c-MAF_4550 (+144609), c-MAF_2860 (+153733), c-MAF_5809 (+159868), c-MAF_1347 (+162291) |
| <i>COG6</i>     | c-MAF_6590 (+33369), c-MAF_904 (+122106)                                                                                                                |
| <i>COIL</i>     | c-MAF_5471 (+23212), c-MAF_1491 (+41932)                                                                                                                |
| <i>COL14A1</i>  | c-MAF_537 (-40323)                                                                                                                                      |
| <i>COL15A1</i>  | c-MAF_864 (+109489), c-MAF_1505 (+113518)                                                                                                               |
| <i>COL16A1</i>  | c-MAF_1391 (-1064)                                                                                                                                      |
| <i>COL17A1</i>  | c-MAF_2740 (+102306)                                                                                                                                    |
| <i>COL18A1</i>  | c-MAF_4436 (-91253)                                                                                                                                     |
| <i>COL4A1</i>   | c-MAF_5891 (+168946)                                                                                                                                    |
| <i>COL4A2</i>   | c-MAF_4390 (+148999)                                                                                                                                    |
| <i>COL4A3BP</i> | c-MAF_5156 (-54939)                                                                                                                                     |
| <i>COL4A4</i>   | c-MAF_4953 (+168415)                                                                                                                                    |
| <i>COL5A1</i>   | c-MAF_4755 (+7619)                                                                                                                                      |
| <i>COL6A3</i>   | c-MAF_6033 (-27317), c-MAF_1708 (-20731), c-MAF_2541 (-18765)                                                                                           |
| <i>COL9A1</i>   | c-MAF_4788 (-96275)                                                                                                                                     |
| <i>COL9A2</i>   | c-MAF_4263 (-24450)                                                                                                                                     |
| <i>COLGALT2</i> | c-MAF_595 (+80905), c-MAF_2516 (+121496)                                                                                                                |
| <i>COLQ</i>     | c-MAF_5196 (+1389)                                                                                                                                      |
| <i>COMMD3</i>   | c-MAF_1719 (-69105), c-MAF_5645 (-63870)                                                                                                                |
| <i>COMMD5</i>   | c-MAF_6475 (-24911), c-MAF_6498 (+888)                                                                                                                  |
| <i>COPE</i>     | c-MAF_4342 (-100)                                                                                                                                       |
| <i>COPG1</i>    | c-MAF_1295 (-53779)                                                                                                                                     |
| <i>COPG2</i>    | c-MAF_2177 (+19527)                                                                                                                                     |



|                    |                                                                                                                                                        |
|--------------------|--------------------------------------------------------------------------------------------------------------------------------------------------------|
| <i>COPRS</i>       | c-MAF_4934 (-19509)                                                                                                                                    |
| <i>COPS2</i>       | c-MAF_5680 (+118650), c-MAF_2798 (+132163)                                                                                                             |
| <i>COPS4</i>       | c-MAF_4288 (-186)                                                                                                                                      |
| <i>COQ2</i>        | c-MAF_1574 (-8917), c-MAF_1508 (+67002)                                                                                                                |
| <i>COQ3</i>        | c-MAF_6117 (+15419), c-MAF_1827 (+31251)                                                                                                               |
| <i>CORO1A</i>      | c-MAF_6018 (-52536), c-MAF_2402 (+2654)                                                                                                                |
| <i>CORO1C</i>      | c-MAF_1631 (-107079), c-MAF_2790 (+39693), c-MAF_6257 (+66688), c-MAF_3271 (+78361)                                                                    |
| <i>CORO6</i>       | c-MAF_5483 (-138260), c-MAF_348 (-83740), c-MAF_3574 (+7612)                                                                                           |
| <i>CORO7-PAM16</i> | c-MAF_392 (+2126)                                                                                                                                      |
| <i>COTL1</i>       | c-MAF_6159 (-13108), c-MAF_1050 (+18246), c-MAF_1257 (+22771)                                                                                          |
| <i>COX10</i>       | c-MAF_6450 (+8667), c-MAF_4441 (+131844)                                                                                                               |
| <i>COX11</i>       | c-MAF_5958 (-124776), c-MAF_929 (-120726)                                                                                                              |
| <i>COX14</i>       | c-MAF_3511 (-1675)                                                                                                                                     |
| <i>COX16</i>       | c-MAF_5210 (-58)                                                                                                                                       |
| <i>COX18</i>       | c-MAF_1233 (+1576)                                                                                                                                     |
| <i>COX20</i>       | c-MAF_4243 (-496)                                                                                                                                      |
| <i>COX4I2</i>      | c-MAF_2521 (+37348), c-MAF_3801 (+61510)                                                                                                               |
| <i>COX6A1P2</i>    | c-MAF_1697 (+5486)                                                                                                                                     |
| <i>COX6C</i>       | c-MAF_6410 (+260), c-MAF_5585 (+119099), c-MAF_2024 (+178852)                                                                                          |
| <i>CPB2</i>        | c-MAF_3289 (-97381)                                                                                                                                    |
| <i>CPD</i>         | c-MAF_991 (-14902)                                                                                                                                     |
| <i>CPEB2</i>       | c-MAF_1356 (+278)                                                                                                                                      |
| <i>CPEB3</i>       | c-MAF_5267 (+627), c-MAF_6343 (+50571), c-MAF_6509 (+58018)                                                                                            |
| <i>CPEB4</i>       | c-MAF_3474 (-65706)                                                                                                                                    |
| <i>CPLX4</i>       | c-MAF_4368 (-39509)                                                                                                                                    |
| <i>CPNE5</i>       | c-MAF_2315 (-22482), c-MAF_5694 (+84077)                                                                                                               |
| <i>CPOX</i>        | c-MAF_617 (+37654)                                                                                                                                     |
| <i>CPSF3</i>       | c-MAF_291 (+40167)                                                                                                                                     |
| <i>CPT1A</i>       | c-MAF_3886 (+2604)                                                                                                                                     |
| <i>CPVL</i>        | c-MAF_4034 (-1084)                                                                                                                                     |
| <i>CPXMI</i>       | c-MAF_3852 (-530)                                                                                                                                      |
| <i>CRADD</i>       | c-MAF_5094 (-106765), c-MAF_6576 (+89921), c-MAF_5148 (+99792), c-MAF_4135 (+107704), c-MAF_1246 (+169879), c-MAF_1226 (+173786), c-MAF_5954 (+176397) |
| <i>CRB2</i>        | c-MAF_3706 (-16934)                                                                                                                                    |
| <i>CRBN</i>        | c-MAF_3612 (+14261)                                                                                                                                    |
| <i>CREB1</i>       | c-MAF_6214 (-105844)                                                                                                                                   |
| <i>CREB3L1</i>     | c-MAF_2722 (+22703)                                                                                                                                    |
| <i>CREB3L2</i>     | c-MAF_5225 (+80774)                                                                                                                                    |
| <i>CREB5</i>       | c-MAF_6428 (-172851), c-MAF_5392 (-1374)                                                                                                               |
| <i>CREBBP</i>      | c-MAF_6141 (+23356)                                                                                                                                    |
| <i>CREBL2</i>      | c-MAF_1976 (+1658), c-MAF_5879 (+44151)                                                                                                                |
| <i>CREG1</i>       | c-MAF_4448 (-46237)                                                                                                                                    |
| <i>CREG2</i>       | c-MAF_5155 (+59045)                                                                                                                                    |
| <i>CRELD2</i>      | c-MAF_6323 (+17620)                                                                                                                                    |
| <i>CREM</i>        | c-MAF_5450 (-425), c-MAF_4247 (+64147), c-MAF_518 (+68469), c-MAF_236 (+92123)                                                                         |

|                    |                                                                                                                                                                                                                                                                                 |
|--------------------|---------------------------------------------------------------------------------------------------------------------------------------------------------------------------------------------------------------------------------------------------------------------------------|
| <i>CRHBP</i>       | c-MAF_2793 (+6812)                                                                                                                                                                                                                                                              |
| <i>CRIMI</i>       | c-MAF_129 (-115177), c-MAF_548 (-109470), c-MAF_3300 (+105525)                                                                                                                                                                                                                  |
| <i>CRISPLD2</i>    | c-MAF_2104 (-67901), c-MAF_2530 (+78202)                                                                                                                                                                                                                                        |
| <i>CROCC</i>       | c-MAF_4854 (-25716)                                                                                                                                                                                                                                                             |
| <i>CRTAC1</i>      | c-MAF_2600 (+177579)                                                                                                                                                                                                                                                            |
| <i>CRTAM</i>       | c-MAF_3694 (-163179), c-MAF_928 (-147597), c-MAF_424 (-141579), c-MAF_4317 (-137065), c-MAF_60 (-134323), c-MAF_993 (-120847), c-MAF_1914 (-114763), c-MAF_3135 (-111063), c-MAF_509 (-95941), c-MAF_387 (-89368), c-MAF_649 (-62586), c-MAF_4968 (-60146), c-MAF_2203 (+18181) |
| <i>CRTC3</i>       | c-MAF_6231 (-129042), c-MAF_6251 (-115155), c-MAF_5637 (+131351), c-MAF_6547 (+156767)                                                                                                                                                                                          |
| <i>CRY1</i>        | c-MAF_4806 (+676), c-MAF_4234 (+66066)                                                                                                                                                                                                                                          |
| <i>CRYAA</i>       | c-MAF_5618 (+183796)                                                                                                                                                                                                                                                            |
| <i>CRYBA2</i>      | c-MAF_5973 (-230)                                                                                                                                                                                                                                                               |
| <i>CRYBA4</i>      | c-MAF_873 (+21107)                                                                                                                                                                                                                                                              |
| <i>CRYBB1</i>      | c-MAF_5061 (+7617)                                                                                                                                                                                                                                                              |
| <i>CRYBB3</i>      | c-MAF_2910 (-172713), c-MAF_3546 (-123468)                                                                                                                                                                                                                                      |
| <i>CRYGS</i>       | c-MAF_4651 (+12255)                                                                                                                                                                                                                                                             |
| <i>CRYL1</i>       | c-MAF_2810 (+49872), c-MAF_305 (+105955), c-MAF_4847 (+166433)                                                                                                                                                                                                                  |
| <i>CSDE1</i>       | c-MAF_5860 (-6049), c-MAF_965 (+4645)                                                                                                                                                                                                                                           |
| <i>CSEIL</i>       | c-MAF_6363 (+121332)                                                                                                                                                                                                                                                            |
| <i>CSF1</i>        | c-MAF_496 (-108268), c-MAF_2747 (-20145), c-MAF_5105 (-4214)                                                                                                                                                                                                                    |
| <i>CSF1R</i>       | c-MAF_5871 (+46148), c-MAF_5884 (+106132)                                                                                                                                                                                                                                       |
| <i>CSF2</i>        | c-MAF_2435 (-2909), c-MAF_1352 (+9654), c-MAF_2134 (+25529), c-MAF_1720 (+37387)                                                                                                                                                                                                |
| <i>CSF2RB</i>      | c-MAF_609 (-39670), c-MAF_3858 (-28730)                                                                                                                                                                                                                                         |
| <i>CSF3R</i>       | c-MAF_6707 (-167337)                                                                                                                                                                                                                                                            |
| <i>CSGALNAC T1</i> | c-MAF_6581 (-117404), c-MAF_5548 (-94263), c-MAF_3652 (-84730), c-MAF_5263 (+126842), c-MAF_3129 (+128909)                                                                                                                                                                      |
| <i>CSGALNAC T2</i> | c-MAF_2475 (-17411), c-MAF_247 (-8863), c-MAF_5849 (-4060), c-MAF_6281 (+22311)                                                                                                                                                                                                 |
| <i>CSK</i>         | c-MAF_79 (-1663)                                                                                                                                                                                                                                                                |
| <i>CSNK1D</i>      | c-MAF_726 (-24025)                                                                                                                                                                                                                                                              |
| <i>CSPG4</i>       | c-MAF_5623 (-124257)                                                                                                                                                                                                                                                            |
| <i>CSRNP1</i>      | c-MAF_5361 (-24293), c-MAF_5074 (+838)                                                                                                                                                                                                                                          |
| <i>CSRNP2</i>      | c-MAF_6116 (+7074)                                                                                                                                                                                                                                                              |
| <i>CST6</i>        | c-MAF_6346 (+5817)                                                                                                                                                                                                                                                              |
| <i>CST7</i>        | c-MAF_877 (-175296)                                                                                                                                                                                                                                                             |
| <i>CSTA</i>        | c-MAF_466 (-69278), c-MAF_3209 (-26783)                                                                                                                                                                                                                                         |
| <i>CSTB</i>        | c-MAF_5784 (+47918)                                                                                                                                                                                                                                                             |
| <i>CSTF2T</i>      | c-MAF_3441 (-160758), c-MAF_3981 (-8265)                                                                                                                                                                                                                                        |
| <i>CTAG2</i>       | c-MAF_2568 (-80750), c-MAF_1227 (-71692), c-MAF_199 (-65955)                                                                                                                                                                                                                    |
| <i>CTAGE5</i>      | c-MAF_6027 (+2878)                                                                                                                                                                                                                                                              |
| <i>CTAGE6</i>      | c-MAF_3044 (-172021)                                                                                                                                                                                                                                                            |
| <i>CTBP1</i>       | c-MAF_3059 (+46946)                                                                                                                                                                                                                                                             |
| <i>CTBS</i>        | c-MAF_5665 (-45383), c-MAF_2523 (+1292)                                                                                                                                                                                                                                         |
| <i>CTC1</i>        | c-MAF_1702 (+26999)                                                                                                                                                                                                                                                             |
| <i>CTCFL</i>       | c-MAF_6761 (+48773)                                                                                                                                                                                                                                                             |
| <i>CTDPI</i>       | c-MAF_6288 (-175710), c-MAF_4543 (-162857), c-MAF_536 (-155896), c-MAF_3780 (-174), c-MAF_6677 (+6457)                                                                                                                                                                          |
| <i>CTDSP2</i>      | c-MAF_2598 (-52882)                                                                                                                                                                                                                                                             |

|                |                                                                                                                                                                                                                                 |
|----------------|---------------------------------------------------------------------------------------------------------------------------------------------------------------------------------------------------------------------------------|
| <i>CTHRC1</i>  | c-MAF_6350 (-34839)                                                                                                                                                                                                             |
| <i>CTLA4</i>   | c-MAF_3120 (-137757), c-MAF_2160 (-126615), c-MAF_2707 (-55731), c-MAF_56 (-37251), c-MAF_634 (-31452), c-MAF_3 (-10006), c-MAF_3479 (+3956), c-MAF_5217 (+15201), c-MAF_260 (+23738), c-MAF_1935 (+26491), c-MAF_2807 (+29956) |
| <i>CTNNA1</i>  | c-MAF_4574 (-98869), c-MAF_2362 (+4254)                                                                                                                                                                                         |
| <i>CTNNA3</i>  | c-MAF_1946 (+82924)                                                                                                                                                                                                             |
| <i>CTNNB1</i>  | c-MAF_1803 (-10898)                                                                                                                                                                                                             |
| <i>CTR9</i>    | c-MAF_2412 (-8008)                                                                                                                                                                                                              |
| <i>CTRC</i>    | c-MAF_5401 (-22143)                                                                                                                                                                                                             |
| <i>CTSB</i>    | c-MAF_3835 (-9724), c-MAF_3637 (+6613), c-MAF_6080 (+14106)                                                                                                                                                                     |
| <i>CTSC</i>    | c-MAF_1894 (-83945), c-MAF_5715 (-16508), c-MAF_84 (+1141)                                                                                                                                                                      |
| <i>CTSG</i>    | c-MAF_2423 (-30947)                                                                                                                                                                                                             |
| <i>CTSL</i>    | c-MAF_2424 (-39427), c-MAF_570 (-23211), c-MAF_4820 (-16325), c-MAF_126 (-11868)                                                                                                                                                |
| <i>CTSV</i>    | c-MAF_1666 (-127538)                                                                                                                                                                                                            |
| <i>CTTN</i>    | c-MAF_3210 (-33097)                                                                                                                                                                                                             |
| <i>CTU2</i>    | c-MAF_703 (+74763)                                                                                                                                                                                                              |
| <i>CTXN3</i>   | c-MAF_216 (+136621)                                                                                                                                                                                                             |
| <i>CUBN</i>    | c-MAF_1514 (+102776)                                                                                                                                                                                                            |
| <i>CUL1</i>    | c-MAF_3816 (-134015), c-MAF_1237 (-11145)                                                                                                                                                                                       |
| <i>CUL2</i>    | c-MAF_4421 (+68308)                                                                                                                                                                                                             |
| <i>CUL3</i>    | c-MAF_6405 (+23981)                                                                                                                                                                                                             |
| <i>CUL4A</i>   | c-MAF_1016 (-3847)                                                                                                                                                                                                              |
| <i>CUL4B</i>   | c-MAF_1134 (+89990)                                                                                                                                                                                                             |
| <i>CUX2</i>    | c-MAF_5983 (+23207)                                                                                                                                                                                                             |
| <i>CWF19L2</i> | c-MAF_6680 (-104058)                                                                                                                                                                                                            |
| <i>CWH43</i>   | c-MAF_5703 (-22977)                                                                                                                                                                                                             |
| <i>CX3CR1</i>  | c-MAF_2602 (+46861), c-MAF_4452 (+65399)                                                                                                                                                                                        |
| <i>CXCL17</i>  | c-MAF_3941 (-51490)                                                                                                                                                                                                             |
| <i>CXCL6</i>   | c-MAF_205 (-21149)                                                                                                                                                                                                              |
| <i>CXCR4</i>   | c-MAF_5195 (+110586)                                                                                                                                                                                                            |
| <i>CXCR5</i>   | c-MAF_6529 (-11084), c-MAF_5032 (-6806)                                                                                                                                                                                         |
| <i>CXCR6</i>   | c-MAF_551 (-29000), c-MAF_6574 (-5903), c-MAF_4050 (+10962), c-MAF_5571 (+19288), c-MAF_2428 (+27890), c-MAF_96 (+31930), c-MAF_414 (+48892)                                                                                    |
| <i>CXXC11</i>  | c-MAF_3319 (+63857)                                                                                                                                                                                                             |
| <i>CXorf27</i> | c-MAF_1242 (-118585), c-MAF_5833 (-12945), c-MAF_3268 (+17557)                                                                                                                                                                  |
| <i>CYB56I</i>  | c-MAF_2382 (+6345)                                                                                                                                                                                                              |
| <i>CYB5R2</i>  | c-MAF_4754 (+96183)                                                                                                                                                                                                             |
| <i>CYCS</i>    | c-MAF_5005 (+30851), c-MAF_853 (+96626)                                                                                                                                                                                         |
| <i>CYFIP2</i>  | c-MAF_780 (-69982), c-MAF_3659 (-48627), c-MAF_3865 (-43377), c-MAF_5351 (-38561), c-MAF_3337 (-13056), c-MAF_3021 (+6432)                                                                                                      |
| <i>CYGB</i>    | c-MAF_889 (+22241), c-MAF_507 (+25980)                                                                                                                                                                                          |
| <i>CYLD</i>    | c-MAF_5961 (-44535), c-MAF_3110 (+4570)                                                                                                                                                                                         |
| <i>CYP11A1</i> | c-MAF_2639 (-35247), c-MAF_3259 (-32217)                                                                                                                                                                                        |
| <i>CYP11B2</i> | c-MAF_3320 (-73032)                                                                                                                                                                                                             |
| <i>CYP11B1</i> | c-MAF_6377 (-70959), c-MAF_157 (-1138)                                                                                                                                                                                          |
| <i>CYP2D6</i>  | c-MAF_2156 (-49558), c-MAF_1651 (-43406), c-MAF_1595 (+9860)                                                                                                                                                                    |
| <i>CYP2E1</i>  | c-MAF_3604 (-66723), c-MAF_1853 (-44940)                                                                                                                                                                                        |

|                |                                                                                                                             |
|----------------|-----------------------------------------------------------------------------------------------------------------------------|
| <i>CYP2W1</i>  | c-MAF_2119 (+61033)                                                                                                         |
| <i>CYP3A5</i>  | c-MAF_6467 (+56593)                                                                                                         |
| <i>CYP7B1</i>  | c-MAF_66 (+41964)                                                                                                           |
| <i>CYSLTR2</i> | c-MAF_399 (+85191), c-MAF_3122 (+147110), c-MAF_1517 (+177668)                                                              |
| <i>CYSTM1</i>  | c-MAF_3025 (+77093)                                                                                                         |
| <i>CYTH1</i>   | c-MAF_128 (-35043), c-MAF_3743 (-23091), c-MAF_3316 (-16034), c-MAF_2973 (+10284), c-MAF_1558 (+20013), c-MAF_2449 (+34079) |
| <i>CYTH3</i>   | c-MAF_1585 (+51139)                                                                                                         |
| <i>CYTH4</i>   | c-MAF_6347 (-8658), c-MAF_771 (-6615), c-MAF_966 (-535)                                                                     |
| <i>CYTIP</i>   | c-MAF_5486 (-35937), c-MAF_4057 (-25336), c-MAF_2262 (-20204), c-MAF_4419 (+111), c-MAF_5492 (+10709)                       |
| <i>D2HGDH</i>  | c-MAF_3668 (+5384), c-MAF_319 (+24842), c-MAF_21 (+28236)                                                                   |
| <i>DAAMI</i>   | c-MAF_1174 (+38154)                                                                                                         |
| <i>DAD1</i>    | c-MAF_6153 (+16457), c-MAF_1429 (+22275), c-MAF_3350 (+76384), c-MAF_6273 (+82017)                                          |
| <i>DAGLA</i>   | c-MAF_2058 (+15708)                                                                                                         |
| <i>DAP3</i>    | c-MAF_6226 (+56481)                                                                                                         |
| <i>DAPK2</i>   | c-MAF_1945 (+143370), c-MAF_2495 (+147318)                                                                                  |
| <i>DARS</i>    | c-MAF_5195 (-19973), c-MAF_5932 (-140), c-MAF_2574 (+24617)                                                                 |
| <i>DARS2</i>   | c-MAF_3298 (+644)                                                                                                           |
| <i>DAWI</i>    | c-MAF_1721 (-22787), c-MAF_3200 (-8071)                                                                                     |
| <i>DBNL</i>    | c-MAF_5138 (+2029)                                                                                                          |
| <i>DBR1</i>    | c-MAF_3979 (-121991)                                                                                                        |
| <i>DCAF12</i>  | c-MAF_5326 (+138272)                                                                                                        |
| <i>DCAF4</i>   | c-MAF_3436 (+763)                                                                                                           |
| <i>DCAF5</i>   | c-MAF_823 (+83892)                                                                                                          |
| <i>DCAF8</i>   | c-MAF_3394 (+672)                                                                                                           |
| <i>DCBLD1</i>  | c-MAF_1207 (+66460), c-MAF_5183 (+117544)                                                                                   |
| <i>DCLK3</i>   | c-MAF_3957 (-168285)                                                                                                        |
| <i>DCLRE1B</i> | c-MAF_3004 (-431)                                                                                                           |
| <i>DCPIB</i>   | c-MAF_3861 (+10249)                                                                                                         |
| <i>DCP2</i>    | c-MAF_1690 (-12718), c-MAF_2779 (+46147), c-MAF_322 (+74561)                                                                |
| <i>DCPS</i>    | c-MAF_4985 (-18797), c-MAF_2548 (+49794)                                                                                    |
| <i>DCT</i>     | c-MAF_2113 (+60139), c-MAF_3705 (+128130), c-MAF_3681 (+149788), c-MAF_2945 (+173936)                                       |
| <i>DCTD</i>    | c-MAF_4082 (-58618)                                                                                                         |
| <i>DCUNID3</i> | c-MAF_3077 (+3010), c-MAF_2957 (+20524)                                                                                     |
| <i>DCUNID5</i> | c-MAF_6059 (+40977), c-MAF_836 (+55923)                                                                                     |
| <i>DDAH1</i>   | c-MAF_4277 (+166835)                                                                                                        |
| <i>DDB2</i>    | c-MAF_5137 (+1287)                                                                                                          |
| <i>DDC</i>     | c-MAF_5710 (-28928)                                                                                                         |
| <i>DDHD1</i>   | c-MAF_2718 (-37981), c-MAF_3999 (+92816)                                                                                    |
| <i>DDIT4</i>   | c-MAF_870 (-25406), c-MAF_16 (-13146), c-MAF_3925 (+102), c-MAF_1861 (+23514), c-MAF_2289 (+46875), c-MAF_3813 (+54753)     |
| <i>DDR1</i>    | c-MAF_2073 (-114679), c-MAF_2167 (-95933), c-MAF_3526 (-64524)                                                              |
| <i>DDX24</i>   | c-MAF_4816 (+28751)                                                                                                         |
| <i>DDX28</i>   | c-MAF_1221 (-51194)                                                                                                         |
| <i>DDX31</i>   | c-MAF_2528 (-3216)                                                                                                          |
| <i>DDX43</i>   | c-MAF_166 (-5404), c-MAF_5153 (+27919)                                                                                      |

|                |                                                                                                                                   |
|----------------|-----------------------------------------------------------------------------------------------------------------------------------|
| <i>DDX47</i>   | c-MAF_2531 (-75924)                                                                                                               |
| <i>DDX49</i>   | c-MAF_4342 (-178)                                                                                                                 |
| <i>DDX5</i>    | c-MAF_2228 (+1262)                                                                                                                |
| <i>DDX6</i>    | c-MAF_5032 (-85824), c-MAF_6529 (-81546), c-MAF_1032 (+98496)                                                                     |
| <i>DDX60</i>   | c-MAF_2483 (-121922)                                                                                                              |
| <i>DDX60L</i>  | c-MAF_2483 (+39758)                                                                                                               |
| <i>DECRI</i>   | c-MAF_6256 (-154)                                                                                                                 |
| <i>DEDD2</i>   | c-MAF_5640 (+7039), c-MAF_5345 (+20658), c-MAF_3277 (+34701)                                                                      |
| <i>DEF6</i>    | c-MAF_4587 (+5044), c-MAF_2161 (+15119)                                                                                           |
| <i>DEFB136</i> | c-MAF_3835 (+96646)                                                                                                               |
| <i>DENND1B</i> | c-MAF_3052 (-1122), c-MAF_3599 (+13079)                                                                                           |
| <i>DENND1C</i> | c-MAF_5435 (-7550)                                                                                                                |
| <i>DENND2D</i> | c-MAF_1937 (-105)                                                                                                                 |
| <i>DENND3</i>  | c-MAF_3973 (-101645), c-MAF_4835 (-21562), c-MAF_6596 (-20199), c-MAF_6422 (+1400)                                                |
| <i>DENND4A</i> | c-MAF_2351 (-41005), c-MAF_6035 (-26979), c-MAF_2651 (-4605)                                                                      |
| <i>DENND4C</i> | c-MAF_4677 (-68582), c-MAF_2477 (+2692)                                                                                           |
| <i>DENND5A</i> | c-MAF_1930 (+1280), c-MAF_2099 (+63439)                                                                                           |
| <i>DENND6A</i> | c-MAF_1192 (+625)                                                                                                                 |
| <i>DEPDC1B</i> | c-MAF_6743 (+11771)                                                                                                               |
| <i>DEPDC5</i>  | c-MAF_1256 (-108117), c-MAF_5578 (-93783), c-MAF_4239 (-8511), c-MAF_1813 (+106882)                                               |
| <i>DEPDC7</i>  | c-MAF_2432 (-123496), c-MAF_3035 (-53707), c-MAF_3860 (-4281)                                                                     |
| <i>DERL1</i>   | c-MAF_1386 (-15679)                                                                                                               |
| <i>DESII</i>   | c-MAF_3904 (+17009)                                                                                                               |
| <i>DFNA5</i>   | c-MAF_2266 (-163202), c-MAF_5737 (-149528), c-MAF_6182 (-140732), c-MAF_6197 (-125169), c-MAF_1028 (-120109), c-MAF_4673 (-63219) |
| <i>DFNB31</i>  | c-MAF_1540 (+19956)                                                                                                               |
| <i>DGKD</i>    | c-MAF_3651 (+72328)                                                                                                               |
| <i>DGKE</i>    | c-MAF_3650 (+36240)                                                                                                               |
| <i>DGKG</i>    | c-MAF_4651 (-172210)                                                                                                              |
| <i>DGKI</i>    | c-MAF_5225 (-74420)                                                                                                               |
| <i>DGKZ</i>    | c-MAF_2722 (-61230)                                                                                                               |
| <i>DGUOK</i>   | c-MAF_3407 (-130), c-MAF_732 (+5557)                                                                                              |
| <i>DHCR24</i>  | c-MAF_1851 (+85679)                                                                                                               |
| <i>DHFRL1</i>  | c-MAF_2031 (+122)                                                                                                                 |
| <i>DHPS</i>    | c-MAF_3842 (-11106)                                                                                                               |
| <i>DHRS12</i>  | c-MAF_1986 (+1803), c-MAF_5915 (+65411)                                                                                           |
| <i>DHRS3</i>   | c-MAF_6129 (-1671), c-MAF_4078 (+168011)                                                                                          |
| <i>DHRS7C</i>  | c-MAF_3448 (+30833), c-MAF_6010 (+114281)                                                                                         |
| <i>DHTKD1</i>  | c-MAF_2314 (+43998)                                                                                                               |
| <i>DHX15</i>   | c-MAF_3592 (+164804)                                                                                                              |
| <i>DHX37</i>   | c-MAF_3352 (+49699), c-MAF_1281 (+67568)                                                                                          |
| <i>DHX40</i>   | c-MAF_161 (-130014)                                                                                                               |
| <i>DIABLO</i>  | c-MAF_378 (+11475)                                                                                                                |
| <i>DICER1</i>  | c-MAF_4446 (+27132)                                                                                                               |
| <i>DIDO1</i>   | c-MAF_5708 (+16567)                                                                                                               |

|                 |                                                                                                            |
|-----------------|------------------------------------------------------------------------------------------------------------|
| <i>DIO3</i>     | c-MAF_2395 (+160845)                                                                                       |
| <i>DIP2A</i>    | c-MAF_312 (+41567)                                                                                         |
| <i>DIP2B</i>    | c-MAF_5135 (+27881)                                                                                        |
| <i>DIS3L2</i>   | c-MAF_5759 (+152519)                                                                                       |
| <i>DISP2</i>    | c-MAF_1624 (-29360)                                                                                        |
| <i>DKC1</i>     | c-MAF_237 (+36576), c-MAF_4897 (+40836)                                                                    |
| <i>DKK3</i>     | c-MAF_5089 (+126368)                                                                                       |
| <i>DLEC1</i>    | c-MAF_3919 (-305)                                                                                          |
| <i>DLEU1</i>    | c-MAF_685 (+43233), c-MAF_4779 (+142465), c-MAF_146 (+154894)                                              |
| <i>DLG1</i>     | c-MAF_1428 (-121758), c-MAF_4980 (-96135)                                                                  |
| <i>DLG2</i>     | c-MAF_6636 (+31742), c-MAF_3009 (+143248)                                                                  |
| <i>DLG4</i>     | c-MAF_2751 (-1397)                                                                                         |
| <i>DLG5</i>     | c-MAF_2342 (+124859)                                                                                       |
| <i>DLGAP2</i>   | c-MAF_3789 (-62735), c-MAF_1619 (-34549), c-MAF_267 (-24879), c-MAF_4771 (-21611), c-MAF_5198 (+73314)     |
| <i>DLGAP5</i>   | c-MAF_6479 (-148357), c-MAF_2170 (-146268), c-MAF_2259 (-142330), c-MAF_1926 (-29687), c-MAF_4783 (+32977) |
| <i>DLK1</i>     | c-MAF_1245 (-86101)                                                                                        |
| <i>DMBT1</i>    | c-MAF_4472 (-18821)                                                                                        |
| <i>DMWD</i>     | c-MAF_2511 (-17119)                                                                                        |
| <i>DNAH10</i>   | c-MAF_4520 (+175345)                                                                                       |
| <i>DNAH17</i>   | c-MAF_1558 (-184887), c-MAF_2449 (-170821), c-MAF_3964 (-14999)                                            |
| <i>DNAH3</i>    | c-MAF_5749 (-28972)                                                                                        |
| <i>DNAH8</i>    | c-MAF_384 (-9034)                                                                                          |
| <i>DNAJA2</i>   | c-MAF_87 (+24325)                                                                                          |
| <i>DNAJA3</i>   | c-MAF_6710 (-159), c-MAF_1854 (+40356)                                                                     |
| <i>DNAJB1</i>   | c-MAF_5383 (+7643)                                                                                         |
| <i>DNAJB12</i>  | c-MAF_3813 (+26476), c-MAF_2289 (+34354), c-MAF_1861 (+57715)                                              |
| <i>DNAJB14</i>  | c-MAF_4284 (-2681)                                                                                         |
| <i>DNAJB5</i>   | c-MAF_5869 (+2863)                                                                                         |
| <i>DNAJB6</i>   | c-MAF_1466 (-34364), c-MAF_6154 (+53785), c-MAF_4110 (+153922)                                             |
| <i>DNAJC13</i>  | c-MAF_1317 (+132665), c-MAF_527 (+151859)                                                                  |
| <i>DNAJC15</i>  | c-MAF_978 (-31103)                                                                                         |
| <i>DNAJC16</i>  | c-MAF_5984 (+53047)                                                                                        |
| <i>DNAJC18</i>  | c-MAF_5862 (-7954), c-MAF_3702 (+2082), c-MAF_603 (+23612)                                                 |
| <i>DNAJC2</i>   | c-MAF_1135 (-2942), c-MAF_3673 (+35)                                                                       |
| <i>DNAJC5</i>   | c-MAF_73 (-21555)                                                                                          |
| <i>DNAJC5B</i>  | c-MAF_4631 (-65699), c-MAF_2681 (-47598)                                                                   |
| <i>DNAJC8</i>   | c-MAF_4038 (+32972)                                                                                        |
| <i>DNALI1</i>   | c-MAF_2172 (+19706)                                                                                        |
| <i>DNASE1L3</i> | c-MAF_6515 (+8013)                                                                                         |
| <i>DNMI</i>     | c-MAF_242 (-15053)                                                                                         |
| <i>DNPEP</i>    | c-MAF_1636 (+35301)                                                                                        |
| <i>DNPH1</i>    | c-MAF_1766 (+430)                                                                                          |
| <i>DNTTIP2</i>  | c-MAF_6221 (-25155)                                                                                        |
| <i>DOCK1</i>    | c-MAF_4190 (-156188)                                                                                       |

|                |                                                                                                                                                                                                                                                                                                     |
|----------------|-----------------------------------------------------------------------------------------------------------------------------------------------------------------------------------------------------------------------------------------------------------------------------------------------------|
| <i>DOCK10</i>  | c-MAF_6304 (+268), c-MAF_3658 (+52933), c-MAF_1388 (+98852), c-MAF_3045 (+114526)                                                                                                                                                                                                                   |
| <i>DOCK2</i>   | c-MAF_2078 (+164282)                                                                                                                                                                                                                                                                                |
| <i>DOCK8</i>   | c-MAF_3400 (+970), c-MAF_4249 (+33960), c-MAF_5114 (+92297)                                                                                                                                                                                                                                         |
| <i>DOCK9</i>   | c-MAF_2328 (-72318)                                                                                                                                                                                                                                                                                 |
| <i>DOHH</i>    | c-MAF_1084 (+93)                                                                                                                                                                                                                                                                                    |
| <i>DOK1</i>    | c-MAF_835 (+769)                                                                                                                                                                                                                                                                                    |
| <i>DONSON</i>  | c-MAF_217 (+21968)                                                                                                                                                                                                                                                                                  |
| <i>DOTIL</i>   | c-MAF_4522 (+4988)                                                                                                                                                                                                                                                                                  |
| <i>DPCR1</i>   | c-MAF_839 (+23014)                                                                                                                                                                                                                                                                                  |
| <i>DPF1</i>    | c-MAF_3070 (+10205)                                                                                                                                                                                                                                                                                 |
| <i>DPF3</i>    | c-MAF_2607 (+83763)                                                                                                                                                                                                                                                                                 |
| <i>DPH3</i>    | c-MAF_5946 (-218)                                                                                                                                                                                                                                                                                   |
| <i>DPH5</i>    | c-MAF_1978 (-153180)                                                                                                                                                                                                                                                                                |
| <i>DPM2</i>    | c-MAF_2236 (-92584), c-MAF_770 (-90232)                                                                                                                                                                                                                                                             |
| <i>DPP4</i>    | c-MAF_1905 (+168693)                                                                                                                                                                                                                                                                                |
| <i>DPY19L3</i> | c-MAF_3410 (-50610)                                                                                                                                                                                                                                                                                 |
| <i>DPYD</i>    | c-MAF_2742 (+228)                                                                                                                                                                                                                                                                                   |
| <i>DPYS</i>    | c-MAF_4683 (-118847)                                                                                                                                                                                                                                                                                |
| <i>DPYSL2</i>  | c-MAF_4978 (-5744), c-MAF_5240 (+21517)                                                                                                                                                                                                                                                             |
| <i>DRAM1</i>   | c-MAF_4310 (-11180), c-MAF_3958 (+182017)                                                                                                                                                                                                                                                           |
| <i>DRAP1</i>   | c-MAF_5780 (+619), c-MAF_171 (+22360)                                                                                                                                                                                                                                                               |
| <i>DRC1</i>    | c-MAF_1376 (-38397)                                                                                                                                                                                                                                                                                 |
| <i>DRD2</i>    | c-MAF_2285 (-118557), c-MAF_4965 (-112301)                                                                                                                                                                                                                                                          |
| <i>DRD3</i>    | c-MAF_3717 (+33924)                                                                                                                                                                                                                                                                                 |
| <i>DROSHA</i>  | c-MAF_5093 (-42905)                                                                                                                                                                                                                                                                                 |
| <i>DSE</i>     | c-MAF_235 (+22501)                                                                                                                                                                                                                                                                                  |
| <i>DSTN</i>    | c-MAF_3520 (+40235)                                                                                                                                                                                                                                                                                 |
| <i>DSTYK</i>   | c-MAF_1441 (+7480), c-MAF_316 (+11661), c-MAF_499 (+39980)                                                                                                                                                                                                                                          |
| <i>DTHD1</i>   | c-MAF_3007 (-28273), c-MAF_554 (-5060), c-MAF_1498 (+2410), c-MAF_1216 (+39126), c-MAF_4686 (+64761), c-MAF_1592 (+110485)                                                                                                                                                                          |
| <i>DTL</i>     | c-MAF_1011 (+86347)                                                                                                                                                                                                                                                                                 |
| <i>DTNB</i>    | c-MAF_1628 (-178383), c-MAF_6674 (+86715), c-MAF_2205 (+112243), c-MAF_6077 (+115187)                                                                                                                                                                                                               |
| <i>DTX3L</i>   | c-MAF_5085 (+237)                                                                                                                                                                                                                                                                                   |
| <i>DUS4L</i>   | c-MAF_6037 (-3871)                                                                                                                                                                                                                                                                                  |
| <i>DUSP1</i>   | c-MAF_5237 (-27447), c-MAF_1241 (+5772), c-MAF_2551 (+49057)                                                                                                                                                                                                                                        |
| <i>DUSP14</i>  | c-MAF_1758 (-69240), c-MAF_4051 (-48011), c-MAF_2303 (-20974)                                                                                                                                                                                                                                       |
| <i>DUSP16</i>  | c-MAF_4287 (+1035), c-MAF_633 (+61044), c-MAF_6097 (+70318), c-MAF_4379 (+75304), c-MAF_1293 (+79955), c-MAF_225 (+87185), c-MAF_4575 (+91159), c-MAF_74 (+96040), c-MAF_4577 (+100384), c-MAF_815 (+105539), c-MAF_4063 (+116975), c-MAF_950 (+122521), c-MAF_3196 (+162496), c-MAF_1958 (+177637) |
| <i>DUSP2</i>   | c-MAF_5800 (-62182), c-MAF_3358 (-12560)                                                                                                                                                                                                                                                            |
| <i>DUSP27</i>  | c-MAF_5537 (+114371)                                                                                                                                                                                                                                                                                |
| <i>DUSP3</i>   | c-MAF_6210 (-5973)                                                                                                                                                                                                                                                                                  |
| <i>DUSP4</i>   | c-MAF_3553 (-179114), c-MAF_3325 (-173694), c-MAF_5002 (-170473), c-MAF_1981 (-140138), c-MAF_6524 (-92486), c-MAF_4904 (+58519)                                                                                                                                                                    |
| <i>DUSP5</i>   | c-MAF_45 (-141588), c-MAF_2173 (-135848), c-MAF_2891 (-101830), c-MAF_3357 (-82960), c-MAF_934 (-71641), c-MAF_1960 (+15065), c-MAF_1127 (+31183), c-MAF_4991 (+38396)                                                                                                                              |
| <i>DUSP6</i>   | c-MAF_4032 (-141762), c-MAF_3365 (-22655), c-MAF_373 (-9998), c-MAF_264 (+101005), c-MAF_655 (+108511), c-MAF_2384 (+127855), c-MAF_187 (+171514)                                                                                                                                                   |

|                |                                                                                                       |
|----------------|-------------------------------------------------------------------------------------------------------|
| <i>DYM</i>     | c-MAF_3555 (+134460)                                                                                  |
| <i>DYNCIH1</i> | c-MAF_6468 (-87843)                                                                                   |
| <i>DYNCIH3</i> | c-MAF_5474 (-162875)                                                                                  |
| <i>DYNLRB2</i> | c-MAF_1685 (-13416), c-MAF_331 (+29090), c-MAF_2741 (+39620), c-MAF_590 (+42767), c-MAF_2391 (+50298) |
| <i>DYNLT1</i>  | c-MAF_540 (-8970), c-MAF_5230 (-5042), c-MAF_5303 (-1210)                                             |
| <i>DYNLT3</i>  | c-MAF_5833 (-130235), c-MAF_1242 (-24595), c-MAF_4134 (+761)                                          |
| <i>DYSF</i>    | c-MAF_6216 (+65280)                                                                                   |
| <i>DZIP3</i>   | c-MAF_2628 (+10179)                                                                                   |
| <i>E2F2</i>    | c-MAF_5130 (+2877)                                                                                    |
| <i>E2F3</i>    | c-MAF_2789 (+1714)                                                                                    |
| <i>EAPP</i>    | c-MAF_2624 (-73572)                                                                                   |
| <i>EBF1</i>    | c-MAF_2512 (-108338), c-MAF_5599 (-62151), c-MAF_3121 (-20887)                                        |
| <i>ECE1</i>    | c-MAF_2225 (-34220), c-MAF_840 (-5205)                                                                |
| <i>ECHDC1</i>  | c-MAF_6144 (-724)                                                                                     |
| <i>ECI2</i>    | c-MAF_2710 (-1849), c-MAF_4336 (+76205)                                                               |
| <i>ECM2</i>    | c-MAF_5922 (-95897)                                                                                   |
| <i>ECSCR</i>   | c-MAF_5862 (+59159)                                                                                   |
| <i>EDA</i>     | c-MAF_1220 (+3017)                                                                                    |
| <i>EDAR</i>    | c-MAF_1364 (+51111)                                                                                   |
| <i>EDARADD</i> | c-MAF_4022 (+92247), c-MAF_5125 (+108995), c-MAF_6317 (+113331), c-MAF_1340 (+116922)                 |
| <i>EDEM1</i>   | c-MAF_5542 (+9982)                                                                                    |
| <i>EDEM3</i>   | c-MAF_4402 (-112321)                                                                                  |
| <i>EDN1</i>    | c-MAF_6240 (-178815)                                                                                  |
| <i>EDN2</i>    | c-MAF_5262 (-182970)                                                                                  |
| <i>EEA1</i>    | c-MAF_5177 (+1868)                                                                                    |
| <i>EED</i>     | c-MAF_6234 (-29604), c-MAF_2978 (-15683), c-MAF_1354 (-1759), c-MAF_4354 (+42711)                     |
| <i>EEF1A1</i>  | c-MAF_3765 (-65665), c-MAF_2499 (-59655), c-MAF_1316 (-1011)                                          |
| <i>EEF2K</i>   | c-MAF_2258 (+34953)                                                                                   |
| <i>EEPDI</i>   | c-MAF_5389 (+54796)                                                                                   |
| <i>EFCAB13</i> | c-MAF_6017 (-22604)                                                                                   |
| <i>EFCAB7</i>  | c-MAF_6108 (+70866)                                                                                   |
| <i>EFCAB8</i>  | c-MAF_5997 (+108337), c-MAF_5502 (+113472)                                                            |
| <i>EFCAB9</i>  | c-MAF_6557 (+77983)                                                                                   |
| <i>EFHB</i>    | c-MAF_4024 (+2117)                                                                                    |
| <i>EFHC1</i>   | c-MAF_4573 (-29859)                                                                                   |
| <i>EFHD2</i>   | c-MAF_5017 (-80933), c-MAF_5401 (+6401)                                                               |
| <i>EGF</i>     | c-MAF_6099 (+91198), c-MAF_6756 (+142757), c-MAF_997 (+146923)                                        |
| <i>EGFL6</i>   | c-MAF_2393 (-181756), c-MAF_3977 (-141054), c-MAF_5787 (-81757)                                       |
| <i>EGFR</i>    | c-MAF_4430 (-22942), c-MAF_4454 (+67908)                                                              |
| <i>EGLN3</i>   | c-MAF_6156 (-92929), c-MAF_6763 (-67526), c-MAF_4625 (+103895), c-MAF_5766 (+117405)                  |
| <i>EGR2</i>    | c-MAF_2071 (-39876), c-MAF_1269 (-608), c-MAF_1487 (+4756)                                            |
| <i>EHD1</i>    | c-MAF_1334 (+14075), c-MAF_3254 (+19124)                                                              |
| <i>EHD4</i>    | c-MAF_4805 (+1050), c-MAF_752 (+35856)                                                                |
| <i>EI24</i>    | c-MAF_5460 (-54791)                                                                                   |



|                 |                                                                                                    |
|-----------------|----------------------------------------------------------------------------------------------------|
| <i>EID1</i>     | c-MAF_5214 (+2278), c-MAF_4827 (+51259), c-MAF_320 (+62849), c-MAF_5601 (+68432)                   |
| <i>EIF1</i>     | c-MAF_6285 (-40561), c-MAF_3882 (-22540), c-MAF_5521 (-9663), c-MAF_6143 (-391)                    |
| <i>EIF1AX</i>   | c-MAF_4725 (-96082)                                                                                |
| <i>EIF1AY</i>   | c-MAF_3517 (+13)                                                                                   |
| <i>EIF2A</i>    | c-MAF_4315 (-134)                                                                                  |
| <i>EIF2AK3</i>  | c-MAF_141 (-11466), c-MAF_6704 (-775), c-MAF_2197 (+27440)                                         |
| <i>EIF2D</i>    | c-MAF_553 (+32351), c-MAF_1567 (+37108), c-MAF_4925 (+43633), c-MAF_1704 (+55606)                  |
| <i>EIF2S1</i>   | c-MAF_1012 (-2619)                                                                                 |
| <i>EIF2S3</i>   | c-MAF_5323 (-148)                                                                                  |
| <i>EIF3A</i>    | c-MAF_543 (-54638), c-MAF_4734 (-39890), c-MAF_3569 (-320)                                         |
| <i>EIF3G</i>    | c-MAF_4503 (+7310)                                                                                 |
| <i>EIF3J</i>    | c-MAF_4920 (+9398)                                                                                 |
| <i>EIF3K</i>    | c-MAF_4105 (+17778)                                                                                |
| <i>EIF4B</i>    | c-MAF_3645 (-78)                                                                                   |
| <i>EIF4E</i>    | c-MAF_1913 (-557), c-MAF_2702 (+55916)                                                             |
| <i>EIF4E3</i>   | c-MAF_3550 (+22676), c-MAF_5988 (+37092), c-MAF_5420 (+141805)                                     |
| <i>EIF4EBP2</i> | c-MAF_5611 (+26295)                                                                                |
| <i>EIF4G2</i>   | c-MAF_6647 (-710)                                                                                  |
| <i>EIF4G3</i>   | c-MAF_4067 (+154242), c-MAF_5173 (+184444)                                                         |
| <i>EIF5</i>     | c-MAF_6464 (-17)                                                                                   |
| <i>ELAC2</i>    | c-MAF_4204 (+671)                                                                                  |
| <i>ELF2</i>     | c-MAF_5818 (-89620), c-MAF_6553 (-986)                                                             |
| <i>ELF4</i>     | c-MAF_2358 (-10525)                                                                                |
| <i>ELFN2</i>    | c-MAF_4817 (-5096)                                                                                 |
| <i>ELK3</i>     | c-MAF_767 (+1567), c-MAF_857 (+149301)                                                             |
| <i>ELL</i>      | c-MAF_86 (+40119), c-MAF_2085 (+43093), c-MAF_5606 (+46755)                                        |
| <i>ELL2</i>     | c-MAF_5259 (-133073), c-MAF_4445 (+33927), c-MAF_4156 (+99934)                                     |
| <i>ELMO1</i>    | c-MAF_5761 (+191), c-MAF_287 (+8220), c-MAF_155 (+40839), c-MAF_1549 (+72631), c-MAF_1473 (+95488) |
| <i>ELMO2</i>    | c-MAF_1802 (-452), c-MAF_2488 (+5422)                                                              |
| <i>ELMOD1</i>   | c-MAF_4492 (+1611)                                                                                 |
| <i>ELN</i>      | c-MAF_6510 (+34517)                                                                                |
| <i>ELOVL3</i>   | c-MAF_2901 (-36719)                                                                                |
| <i>ELOVL5</i>   | c-MAF_875 (+41888), c-MAF_3740 (+117090), c-MAF_5348 (+160424)                                     |
| <i>ELOVL6</i>   | c-MAF_5268 (+91470), c-MAF_997 (+138839), c-MAF_6756 (+143005)                                     |
| <i>ELP3</i>     | c-MAF_4244 (+99943)                                                                                |
| <i>EMB</i>      | c-MAF_6597 (+411)                                                                                  |
| <i>EMC1</i>     | c-MAF_5894 (-5799)                                                                                 |
| <i>EMID1</i>    | c-MAF_2727 (-2951)                                                                                 |
| <i>EMILIN2</i>  | c-MAF_1120 (+112106), c-MAF_6420 (+134368)                                                         |
| <i>EML2</i>     | c-MAF_4890 (+3131)                                                                                 |
| <i>EML4</i>     | c-MAF_1485 (-67032), c-MAF_911 (-45079), c-MAF_1546 (-36145), c-MAF_3288 (-27394)                  |
| <i>EML6</i>     | c-MAF_2254 (-152012), c-MAF_3417 (-43805)                                                          |
| <i>EMR1</i>     | c-MAF_1804 (-73192), c-MAF_4282 (-37407), c-MAF_3982 (+126458)                                     |
| <i>ENDOD1</i>   | c-MAF_1892 (+140022)                                                                               |
| <i>ENDOV</i>    | c-MAF_4832 (-115970)                                                                               |

|                         |                                                                                                                             |
|-------------------------|-----------------------------------------------------------------------------------------------------------------------------|
| <i>ENG</i>              | c-MAF_6239 (+18761)                                                                                                         |
| <i>ENO1</i>             | c-MAF_2010 (-1536), c-MAF_3899 (+20466)                                                                                     |
| <i>ENO3</i>             | c-MAF_619 (-2254)                                                                                                           |
| <i>ENOSF1</i>           | c-MAF_3095 (+53609)                                                                                                         |
| <i>ENOX1</i>            | c-MAF_436 (-92599)                                                                                                          |
| <i>ENPP3</i>            | c-MAF_6277 (+11827)                                                                                                         |
| <i>ENPP5</i>            | c-MAF_97 (-154899)                                                                                                          |
| <i>ENPP6</i>            | c-MAF_2535 (-45369), c-MAF_2331 (-34610), c-MAF_347 (-19677), c-MAF_5336 (-12386), c-MAF_5547 (+47036), c-MAF_5602 (+69350) |
| <i>ENSA</i>             | c-MAF_5563 (+15773), c-MAF_1279 (+17878), c-MAF_6749 (+32644)                                                               |
| <i>ENSG00000005189</i>  | c-MAF_2957 (+73361)                                                                                                         |
| <i>ENSG000000113811</i> | c-MAF_5619 (-156569), c-MAF_667 (+92)                                                                                       |
| <i>ENSG000000141979</i> | c-MAF_6659 (+389), c-MAF_3750 (+33386)                                                                                      |
| <i>ENSG000000143674</i> | c-MAF_5666 (+79435), c-MAF_6326 (+82017)                                                                                    |
| <i>ENSG000000145965</i> | c-MAF_4764 (-131682)                                                                                                        |
| <i>ENSG000000166329</i> | c-MAF_4948 (+98947)                                                                                                         |
| <i>ENSG000000178404</i> | c-MAF_5362 (+12491)                                                                                                         |
| <i>ENSG000000182319</i> | c-MAF_2716 (-169133), c-MAF_2764 (+33837), c-MAF_2841 (+39724), c-MAF_3478 (+107578)                                        |
| <i>ENSG000000183760</i> | c-MAF_3465 (+9730)                                                                                                          |
| <i>ENSG000000184774</i> | c-MAF_5588 (+14526)                                                                                                         |
| <i>ENSG000000188897</i> | c-MAF_5705 (+64941)                                                                                                         |
| <i>ENSG000000198064</i> | c-MAF_819 (-104840)                                                                                                         |
| <i>ENSG000000198843</i> | c-MAF_3422 (+2922), c-MAF_85 (+134810)                                                                                      |
| <i>ENSG000000203546</i> | c-MAF_2932 (+36335), c-MAF_2135 (+79212)                                                                                    |
| <i>ENSG000000234469</i> | c-MAF_1642 (+36544), c-MAF_4203 (+110542), c-MAF_2190 (+115612), c-MAF_5376 (+143873)                                       |
| <i>ENSG000000248710</i> | c-MAF_4217 (+34161)                                                                                                         |
| <i>ENSG000000249240</i> | c-MAF_2335 (+35757)                                                                                                         |
| <i>ENSG000000254536</i> | c-MAF_4363 (-1625)                                                                                                          |
| <i>ENSG000000255863</i> | c-MAF_6397 (+5546)                                                                                                          |
| <i>ENSG000000256206</i> | c-MAF_4047 (-24488), c-MAF_1615 (-335)                                                                                      |
| <i>ENSG000000256646</i> | c-MAF_5014 (+62645)                                                                                                         |
| <i>ENSG000000257743</i> | c-MAF_5219 (+66388)                                                                                                         |
| <i>ENSG000000258555</i> | c-MAF_156 (+130686)                                                                                                         |
| <i>ENSG000000258677</i> | c-MAF_2235 (-1533)                                                                                                          |
| <i>ENSG000000259753</i> | c-MAF_6017 (+47480)                                                                                                         |
| <i>ENSG000000260170</i> | c-MAF_531 (+634)                                                                                                            |
| <i>ENSG000000260869</i> | c-MAF_1405 (-9051)                                                                                                          |
| <i>ENSG000000260914</i> | c-MAF_2941 (-111381)                                                                                                        |
| <i>ENSG000000261832</i> | c-MAF_3741 (-2177)                                                                                                          |

|                        |                                                                                                                                                                                              |
|------------------------|----------------------------------------------------------------------------------------------------------------------------------------------------------------------------------------------|
| <i>ENSG00000264545</i> | c-MAF_820 (+635), c-MAF_6246 (+162505)                                                                                                                                                       |
| <i>ENSG00000267281</i> | c-MAF_3573 (+7414)                                                                                                                                                                           |
| <i>ENSG00000269210</i> | c-MAF_5652 (-48598), c-MAF_4865 (-37622)                                                                                                                                                     |
| <i>ENSG00000270757</i> | c-MAF_3998 (-386)                                                                                                                                                                            |
| <i>ENSG00000270898</i> | c-MAF_3053 (-24971)                                                                                                                                                                          |
| <i>ENSG00000272410</i> | c-MAF_4770 (+806), c-MAF_5229 (+35429)                                                                                                                                                       |
| <i>ENTPD1</i>          | c-MAF_4621 (+34446), c-MAF_938 (+80039), c-MAF_1258 (+105984)                                                                                                                                |
| <i>ENTPD6</i>          | c-MAF_336 (+27783)                                                                                                                                                                           |
| <i>ENY2</i>            | c-MAF_5731 (-99044)                                                                                                                                                                          |
| <i>EOGT</i>            | c-MAF_5968 (+26119)                                                                                                                                                                          |
| <i>EOMES</i>           | c-MAF_6472 (-30592), c-MAF_4006 (+92920), c-MAF_4850 (+146828), c-MAF_3468 (+177834)                                                                                                         |
| <i>EPAS1</i>           | c-MAF_6082 (-146169), c-MAF_1330 (-27361)                                                                                                                                                    |
| <i>EPB41L2</i>         | c-MAF_4326 (+177729)                                                                                                                                                                         |
| <i>EPB41L4B</i>        | c-MAF_4169 (-143283)                                                                                                                                                                         |
| <i>EPB41L5</i>         | c-MAF_4607 (-184846)                                                                                                                                                                         |
| <i>EPC1</i>            | c-MAF_3809 (-100069), c-MAF_3824 (-31804), c-MAF_6148 (+28524), c-MAF_4 (+102586)                                                                                                            |
| <i>EPC2</i>            | c-MAF_505 (-41348), c-MAF_4938 (+131698), c-MAF_3092 (+168910)                                                                                                                               |
| <i>EPGN</i>            | c-MAF_6773 (-64292)                                                                                                                                                                          |
| <i>EPHB1</i>           | c-MAF_3469 (+109269)                                                                                                                                                                         |
| <i>EPHB6</i>           | c-MAF_1275 (-45575)                                                                                                                                                                          |
| <i>EPM2A</i>           | c-MAF_3201 (-77423)                                                                                                                                                                          |
| <i>EPM2AIP1</i>        | c-MAF_3015 (+701)                                                                                                                                                                            |
| <i>EPPK1</i>           | c-MAF_5091 (-58184)                                                                                                                                                                          |
| <i>EPRS</i>            | c-MAF_6693 (-74)                                                                                                                                                                             |
| <i>EPSI5</i>           | c-MAF_3003 (+14017), c-MAF_445 (+85450), c-MAF_2524 (+89182)                                                                                                                                 |
| <i>EPSI5L1</i>         | c-MAF_932 (+22249), c-MAF_3521 (+100322), c-MAF_3080 (+141285)                                                                                                                               |
| <i>EPS8</i>            | c-MAF_2142 (+88656)                                                                                                                                                                          |
| <i>EPS8L3</i>          | c-MAF_2747 (-126461), c-MAF_496 (-38338)                                                                                                                                                     |
| <i>EPT1</i>            | c-MAF_1376 (+17405)                                                                                                                                                                          |
| <i>EPYC</i>            | c-MAF_2470 (-2888)                                                                                                                                                                           |
| <i>ERBB2IP</i>         | c-MAF_2688 (-152299), c-MAF_5978 (-1588), c-MAF_4524 (+75892)                                                                                                                                |
| <i>ERCC1</i>           | c-MAF_776 (-22830)                                                                                                                                                                           |
| <i>ERCC4</i>           | c-MAF_1468 (+36988)                                                                                                                                                                          |
| <i>ERCC6L2</i>         | c-MAF_4300 (-150988), c-MAF_2401 (+1127), c-MAF_1191 (+140454)                                                                                                                               |
| <i>ERGIC1</i>          | c-MAF_5237 (-35633)                                                                                                                                                                          |
| <i>ERGIC2</i>          | c-MAF_4576 (+490)                                                                                                                                                                            |
| <i>ERII</i>            | c-MAF_386 (-157993), c-MAF_223 (-140097), c-MAF_5824 (-132256), c-MAF_4721 (-129641), c-MAF_1411 (-114210), c-MAF_3660 (-84139), c-MAF_3620 (+9970), c-MAF_1522 (+80063), c-MAF_886 (+86742) |
| <i>ERMN</i>            | c-MAF_5492 (-105720)                                                                                                                                                                         |
| <i>ERMP1</i>           | c-MAF_5238 (-25036), c-MAF_1928 (-21337), c-MAF_3208 (-11835)                                                                                                                                |
| <i>ERO1LB</i>          | c-MAF_1306 (+113182), c-MAF_1384 (+125102), c-MAF_3615 (+138203)                                                                                                                             |
| <i>ERP29</i>           | c-MAF_1742 (+70761), c-MAF_4557 (+83510)                                                                                                                                                     |
| <i>ERP44</i>           | c-MAF_5512 (-176)                                                                                                                                                                            |
| <i>ERRF11</i>          | c-MAF_5131 (-107259), c-MAF_6250 (-64064), c-MAF_6550 (-51969)                                                                                                                               |

|                 |                                                                                                            |
|-----------------|------------------------------------------------------------------------------------------------------------|
| <i>ESD</i>      | c-MAF_5911 (+129065)                                                                                       |
| <i>ESPL1</i>    | c-MAF_1366 (-510)                                                                                          |
| <i>ESR2</i>     | c-MAF_1194 (+119059)                                                                                       |
| <i>ETS1</i>     | c-MAF_6306 (+7603)                                                                                         |
| <i>ETS2</i>     | c-MAF_4023 (+34589), c-MAF_4496 (+153866), c-MAF_1864 (+163943), c-MAF_1513 (+174342), c-MAF_309 (+179928) |
| <i>ETV6</i>     | c-MAF_4349 (+1150), c-MAF_5625 (+172254)                                                                   |
| <i>ETV7</i>     | c-MAF_2229 (+4124)                                                                                         |
| <i>EVA1B</i>    | c-MAF_5008 (-49952)                                                                                        |
| <i>EVC</i>      | c-MAF_6748 (+1494)                                                                                         |
| <i>EVC2</i>     | c-MAF_6748 (-4124)                                                                                         |
| <i>EVI2A</i>    | c-MAF_2579 (-6401), c-MAF_614 (+79)                                                                        |
| <i>EXOC1</i>    | c-MAF_5051 (+11928)                                                                                        |
| <i>EXOC3</i>    | c-MAF_5573 (+21017)                                                                                        |
| <i>EXOC4</i>    | c-MAF_5302 (+62)                                                                                           |
| <i>EXOC6</i>    | c-MAF_5823 (-157967), c-MAF_4681 (-1507)                                                                   |
| <i>EXOC6B</i>   | c-MAF_6102 (-2322)                                                                                         |
| <i>EXOC8</i>    | c-MAF_948 (+164), c-MAF_2711 (+65511)                                                                      |
| <i>EXOSC1</i>   | c-MAF_1657 (+1536)                                                                                         |
| <i>EXOSC4</i>   | c-MAF_4246 (-1284)                                                                                         |
| <i>EXOSC7</i>   | c-MAF_4144 (+35770)                                                                                        |
| <i>EXT1</i>     | c-MAF_4143 (-167804), c-MAF_1196 (+92391)                                                                  |
| <i>EXTL3</i>    | c-MAF_5989 (-183863)                                                                                       |
| <i>EYA2</i>     | c-MAF_1709 (+95595), c-MAF_2967 (+99761)                                                                   |
| <i>EZR</i>      | c-MAF_1717 (-176067), c-MAF_2479 (-50727), c-MAF_5040 (-35246), c-MAF_4273 (+15462), c-MAF_4867 (+132295)  |
| <i>F2</i>       | c-MAF_2035 (-4435)                                                                                         |
| <i>F2R</i>      | c-MAF_3329 (+17150), c-MAF_1360 (+23047), c-MAF_6009 (+74840), c-MAF_2133 (+90139)                         |
| <i>F2RL1</i>    | c-MAF_3329 (-85784), c-MAF_1360 (-79887), c-MAF_6009 (-28094), c-MAF_2133 (-12795)                         |
| <i>F2RL2</i>    | c-MAF_4869 (+14399), c-MAF_650 (+75847), c-MAF_4810 (+80300), c-MAF_4883 (+149624), c-MAF_5739 (+172986)   |
| <i>F5</i>       | c-MAF_2908 (+1484), c-MAF_702 (+94398)                                                                     |
| <i>FA2H</i>     | c-MAF_2317 (-162395)                                                                                       |
| <i>FABP5</i>    | c-MAF_3314 (+3449), c-MAF_2869 (+6577), c-MAF_961 (+10991), c-MAF_3324 (+70716)                            |
| <i>FADS2</i>    | c-MAF_2346 (+240)                                                                                          |
| <i>FAH</i>      | c-MAF_5223 (+8000)                                                                                         |
| <i>FAHD2A</i>   | c-MAF_705 (+128832)                                                                                        |
| <i>FAHD2B</i>   | c-MAF_1788 (+117065)                                                                                       |
| <i>FAIM2</i>    | c-MAF_1968 (-31166)                                                                                        |
| <i>FAIM3</i>    | c-MAF_6200 (-83)                                                                                           |
| <i>FAM105B</i>  | c-MAF_6162 (-82264), c-MAF_5452 (+130445), c-MAF_2834 (+145190)                                            |
| <i>FAM109A</i>  | c-MAF_5241 (+9325)                                                                                         |
| <i>FAM110A</i>  | c-MAF_2561 (-4567), c-MAF_526 (-391)                                                                       |
| <i>FAM110C</i>  | c-MAF_5866 (+12478)                                                                                        |
| <i>FAM114A1</i> | c-MAF_3197 (+163010)                                                                                       |
| <i>FAM120A</i>  | c-MAF_6258 (+15604)                                                                                        |
| <i>FAM120B</i>  | c-MAF_1603 (+38355)                                                                                        |

|                 |                                                                                                                                                                       |
|-----------------|-----------------------------------------------------------------------------------------------------------------------------------------------------------------------|
| <i>FAM122B</i>  | c-MAF_2995 (+77144)                                                                                                                                                   |
| <i>FAM124B</i>  | c-MAF_6405 (-159333)                                                                                                                                                  |
| <i>FAM126A</i>  | c-MAF_1049 (-8275), c-MAF_5385 (+17579)                                                                                                                               |
| <i>FAM127A</i>  | c-MAF_3283 (+181169)                                                                                                                                                  |
| <i>FAM129A</i>  | c-MAF_4402 (+107314)                                                                                                                                                  |
| <i>FAM129B</i>  | c-MAF_6562 (-1139)                                                                                                                                                    |
| <i>FAM13B</i>   | c-MAF_5802 (+35118), c-MAF_1296 (+37829)                                                                                                                              |
| <i>FAM156A</i>  | c-MAF_5538 (+37445)                                                                                                                                                   |
| <i>FAM156B</i>  | c-MAF_5538 (+23740)                                                                                                                                                   |
| <i>FAM159A</i>  | c-MAF_6013 (+26136)                                                                                                                                                   |
| <i>FAM169A</i>  | c-MAF_894 (-68498)                                                                                                                                                    |
| <i>FAM171A1</i> | c-MAF_4860 (+182226)                                                                                                                                                  |
| <i>FAM171B</i>  | c-MAF_5338 (-102869)                                                                                                                                                  |
| <i>FAM174A</i>  | c-MAF_5108 (+15480)                                                                                                                                                   |
| <i>FAM174B</i>  | c-MAF_458 (-176484), c-MAF_3771 (-7428), c-MAF_1596 (+30222), c-MAF_5337 (+128014)                                                                                    |
| <i>FAM180A</i>  | c-MAF_3934 (-180589)                                                                                                                                                  |
| <i>FAM184A</i>  | c-MAF_5937 (-68800)                                                                                                                                                   |
| <i>FAM185A</i>  | c-MAF_332 (+85980), c-MAF_2159 (+94840)                                                                                                                               |
| <i>FAM189A2</i> | c-MAF_2349 (+145655), c-MAF_3183 (+173809)                                                                                                                            |
| <i>FAM192A</i>  | c-MAF_5777 (+171357)                                                                                                                                                  |
| <i>FAM19A3</i>  | c-MAF_6060 (+183816)                                                                                                                                                  |
| <i>FAM19A4</i>  | c-MAF_5968 (-54894)                                                                                                                                                   |
| <i>FAM210A</i>  | c-MAF_2914 (+158724)                                                                                                                                                  |
| <i>FAM26F</i>   | c-MAF_235 (-68534)                                                                                                                                                    |
| <i>FAM3C</i>    | c-MAF_2522 (-148535), c-MAF_2962 (-134178), c-MAF_3334 (+1488)                                                                                                        |
| <i>FAM49B</i>   | c-MAF_1736 (-172622), c-MAF_6361 (-166485), c-MAF_3726 (-128807), c-MAF_355 (-102550), c-MAF_4983 (-97173), c-MAF_5669 (+1272)                                        |
| <i>FAM50B</i>   | c-MAF_4764 (+1607)                                                                                                                                                    |
| <i>FAM53B</i>   | c-MAF_2754 (+10764), c-MAF_3269 (+15229), c-MAF_707 (+20601), c-MAF_1578 (+25714), c-MAF_1714 (+41748), c-MAF_1646 (+54966), c-MAF_6417 (+86104), c-MAF_5092 (+95150) |
| <i>FAM57B</i>   | c-MAF_357 (-2244)                                                                                                                                                     |
| <i>FAM60A</i>   | c-MAF_6725 (+1251)                                                                                                                                                    |
| <i>FAM65B</i>   | c-MAF_5331 (-145510), c-MAF_6502 (-139690), c-MAF_3403 (-128164), c-MAF_859 (-115105), c-MAF_1465 (-63777), c-MAF_6314 (-423)                                         |
| <i>FAM69A</i>   | c-MAF_5419 (-81387)                                                                                                                                                   |
| <i>FAM69C</i>   | c-MAF_6135 (-27857)                                                                                                                                                   |
| <i>FAM71B</i>   | c-MAF_2876 (-6313), c-MAF_5455 (+6783)                                                                                                                                |
| <i>FAM83D</i>   | c-MAF_2282 (-76678), c-MAF_274 (-53064), c-MAF_4973 (-32486)                                                                                                          |
| <i>FAM8A1</i>   | c-MAF_3153 (+73553), c-MAF_2155 (+103135)                                                                                                                             |
| <i>FAM9B</i>    | c-MAF_4943 (-155771), c-MAF_4094 (-96166)                                                                                                                             |
| <i>FAM9C</i>    | c-MAF_5614 (-49241), c-MAF_4919 (-45906), c-MAF_4018 (-42891), c-MAF_3073 (-6947), c-MAF_2176 (+44100), c-MAF_2396 (+66443)                                           |
| <i>FANCC</i>    | c-MAF_5096 (-144907), c-MAF_4477 (+128202)                                                                                                                            |
| <i>FANCE</i>    | c-MAF_4659 (-50002)                                                                                                                                                   |
| <i>FANCG</i>    | c-MAF_6040 (-5143)                                                                                                                                                    |
| <i>FANK1</i>    | c-MAF_5677 (+103254), c-MAF_2960 (+165999)                                                                                                                            |
| <i>FARP2</i>    | c-MAF_628 (+87715)                                                                                                                                                    |
| <i>FARSB</i>    | c-MAF_3076 (+3037), c-MAF_6531 (+83663)                                                                                                                               |

|               |                                                                                                                             |
|---------------|-----------------------------------------------------------------------------------------------------------------------------|
| <i>FAS</i>    | c-MAF_2345 (+877)                                                                                                           |
| <i>FASLG</i>  | c-MAF_1181 (-19630), c-MAF_3730 (-15233), c-MAF_1984 (+3890), c-MAF_5776 (+40409), c-MAF_751 (+49671), c-MAF_3876 (+179506) |
| <i>FAXC</i>   | c-MAF_6117 (-29130), c-MAF_1827 (-13298)                                                                                    |
| <i>FBLIM1</i> | c-MAF_1569 (+71293)                                                                                                         |
| <i>FBLN2</i>  | c-MAF_3413 (+26012)                                                                                                         |
| <i>FBLN5</i>  | c-MAF_2606 (-32484)                                                                                                         |
| <i>FBLN7</i>  | c-MAF_1760 (+49887)                                                                                                         |
| <i>FBN1</i>   | c-MAF_3266 (-156602)                                                                                                        |
| <i>FBP1</i>   | c-MAF_4786 (-29149)                                                                                                         |
| <i>FBXL14</i> | c-MAF_4048 (-25617), c-MAF_6408 (+2368), c-MAF_2556 (+60275), c-MAF_2976 (+171224)                                          |
| <i>FBXL19</i> | c-MAF_3761 (-1485)                                                                                                          |
| <i>FBXL20</i> | c-MAF_3563 (-4061), c-MAF_6335 (+11612)                                                                                     |
| <i>FBXL22</i> | c-MAF_1962 (+154741)                                                                                                        |
| <i>FBXL8</i>  | c-MAF_4133 (-219)                                                                                                           |
| <i>FBXO10</i> | c-MAF_1687 (+26533), c-MAF_2623 (+44203), c-MAF_1951 (+47007)                                                               |
| <i>FBXO3</i>  | c-MAF_3301 (+20992)                                                                                                         |
| <i>FBXO30</i> | c-MAF_3500 (-90346), c-MAF_306 (-5492), c-MAF_3201 (+1306)                                                                  |
| <i>FBXO31</i> | c-MAF_6628 (-266)                                                                                                           |
| <i>FBXO32</i> | c-MAF_3581 (+4132)                                                                                                          |
| <i>FBXO33</i> | c-MAF_6027 (+162498)                                                                                                        |
| <i>FBXO4</i>  | c-MAF_4966 (-34000), c-MAF_4632 (-539)                                                                                      |
| <i>FBXO45</i> | c-MAF_1969 (-40704), c-MAF_193 (-4534)                                                                                      |
| <i>FBXO8</i>  | c-MAF_4008 (-139292), c-MAF_2907 (-74761), c-MAF_5347 (+727)                                                                |
| <i>FBXW11</i> | c-MAF_3060 (-106631), c-MAF_471 (+1583)                                                                                     |
| <i>FBXW2</i>  | c-MAF_4478 (-45843)                                                                                                         |
| <i>FBXW4</i>  | c-MAF_6327 (+473)                                                                                                           |
| <i>FBXW7</i>  | c-MAF_5313 (-18287)                                                                                                         |
| <i>FBXW8</i>  | c-MAF_2986 (+49428)                                                                                                         |
| <i>FBXW9</i>  | c-MAF_3770 (-26225), c-MAF_3842 (+3635)                                                                                     |
| <i>FCER1G</i> | c-MAF_5897 (+2205)                                                                                                          |
| <i>FCGBP</i>  | c-MAF_3207 (-7441)                                                                                                          |
| <i>FCGR2A</i> | c-MAF_194 (-153807), c-MAF_2509 (-118786), c-MAF_6569 (-105921)                                                             |
| <i>FCGR3A</i> | c-MAF_2576 (-71431), c-MAF_211 (+10034)                                                                                     |
| <i>FCGR3B</i> | c-MAF_2576 (+9747)                                                                                                          |
| <i>FCHO1</i>  | c-MAF_5073 (+2438)                                                                                                          |
| <i>FCHO2</i>  | c-MAF_6435 (-59940), c-MAF_3342 (+35566)                                                                                    |
| <i>FCHSD2</i> | c-MAF_6181 (+2430), c-MAF_5726 (+107690), c-MAF_971 (+172133)                                                               |
| <i>FDFT1</i>  | c-MAF_3742 (-19667), c-MAF_6080 (+51512), c-MAF_3637 (+59005)                                                               |
| <i>FDX1</i>   | c-MAF_813 (-117869), c-MAF_1679 (-83875), c-MAF_430 (-80070)                                                                |
| <i>FEM1A</i>  | c-MAF_1461 (-167), c-MAF_6434 (+21364)                                                                                      |
| <i>FEM1B</i>  | c-MAF_3588 (+33), c-MAF_3097 (+7694), c-MAF_4698 (+10829)                                                                   |
| <i>FEM1C</i>  | c-MAF_3452 (+82996)                                                                                                         |
| <i>FERMT2</i> | c-MAF_3999 (-109185), c-MAF_6620 (+32436)                                                                                   |
| <i>FES</i>    | c-MAF_6577 (-14504), c-MAF_4773 (-11556)                                                                                    |

|                |                                                                                                                                                  |
|----------------|--------------------------------------------------------------------------------------------------------------------------------------------------|
| <i>FEZ1</i>    | c-MAF_5460 (-18301)                                                                                                                              |
| <i>FEZ2</i>    | c-MAF_3300 (+136740)                                                                                                                             |
| <i>FEZF2</i>   | c-MAF_6459 (+54221)                                                                                                                              |
| <i>FFAR2</i>   | c-MAF_534 (-44825), c-MAF_842 (-11544), c-MAF_98 (+14619)                                                                                        |
| <i>FFAR3</i>   | c-MAF_3139 (-306)                                                                                                                                |
| <i>FGD3</i>    | c-MAF_5908 (+16975)                                                                                                                              |
| <i>FGD6</i>    | c-MAF_6136 (-1491)                                                                                                                               |
| <i>FGF1</i>    | c-MAF_525 (+148731)                                                                                                                              |
| <i>FGF2</i>    | c-MAF_2086 (-80029)                                                                                                                              |
| <i>FGF21</i>   | c-MAF_5781 (+25433)                                                                                                                              |
| <i>FGFR1OP</i> | c-MAF_1696 (+57423), c-MAF_1584 (+92449)                                                                                                         |
| <i>FGGY</i>    | c-MAF_6230 (+58553), c-MAF_1843 (+180482)                                                                                                        |
| <i>FGL2</i>    | c-MAF_2055 (-153679)                                                                                                                             |
| <i>FIGNL1</i>  | c-MAF_1793 (+98996)                                                                                                                              |
| <i>FITM2</i>   | c-MAF_5011 (+110055)                                                                                                                             |
| <i>FKBP11</i>  | c-MAF_6397 (-8290)                                                                                                                               |
| <i>FKBP15</i>  | c-MAF_4325 (+1212), c-MAF_4035 (+6091), c-MAF_1710 (+65223)                                                                                      |
| <i>FKBP3</i>   | c-MAF_1898 (+45325)                                                                                                                              |
| <i>FKBP5</i>   | c-MAF_5912 (-3296), c-MAF_3498 (+450), c-MAF_2150 (+18060), c-MAF_1371 (+117253)                                                                 |
| <i>FKBP6</i>   | c-MAF_3216 (+2099)                                                                                                                               |
| <i>FKBP9</i>   | c-MAF_2912 (-64211)                                                                                                                              |
| <i>FLCN</i>    | c-MAF_4366 (-388)                                                                                                                                |
| <i>FLII</i>    | c-MAF_517 (+1521), c-MAF_2082 (+53932), c-MAF_4969 (+63473), c-MAF_4986 (+89732)                                                                 |
| <i>FLNA</i>    | c-MAF_5757 (+61251)                                                                                                                              |
| <i>FLNB</i>    | c-MAF_3426 (-24458), c-MAF_1206 (-9634)                                                                                                          |
| <i>FLOT1</i>   | c-MAF_4481 (-1714)                                                                                                                               |
| <i>FLT1</i>    | c-MAF_3199 (-44725), c-MAF_3724 (-29219), c-MAF_3353 (+136879)                                                                                   |
| <i>FLT3LG</i>  | c-MAF_1310 (-16249), c-MAF_3371 (-5237)                                                                                                          |
| <i>FLT4</i>    | c-MAF_3732 (-68538)                                                                                                                              |
| <i>FLVCR2</i>  | c-MAF_1108 (-35697), c-MAF_5075 (-27268), c-MAF_152 (-16300), c-MAF_1676 (-12041)                                                                |
| <i>FLYWCHI</i> | c-MAF_3720 (+3748)                                                                                                                               |
| <i>FMNL1</i>   | c-MAF_2815 (+4437)                                                                                                                               |
| <i>FNBP1</i>   | c-MAF_4108 (+4436), c-MAF_1250 (+8480), c-MAF_5097 (+97846), c-MAF_4444 (+122864), c-MAF_4165 (+132442), c-MAF_1204 (+179927)                    |
| <i>FNDC1</i>   | c-MAF_3575 (-70446)                                                                                                                              |
| <i>FNDC3A</i>  | c-MAF_399 (-183906), c-MAF_3122 (-121987), c-MAF_1517 (-91429), c-MAF_5260 (-83457), c-MAF_2064 (+378)                                           |
| <i>FNDC3B</i>  | c-MAF_4882 (-1101), c-MAF_6245 (+67032), c-MAF_4571 (+98430), c-MAF_3453 (+112976)                                                               |
| <i>FNDC7</i>   | c-MAF_2157 (-9037)                                                                                                                               |
| <i>FNDC9</i>   | c-MAF_3354 (-44847), c-MAF_3021 (+73159)                                                                                                         |
| <i>FNIP2</i>   | c-MAF_3613 (+51117), c-MAF_1089 (+54552), c-MAF_1510 (+80810)                                                                                    |
| <i>FOPNL</i>   | c-MAF_3625 (-9282)                                                                                                                               |
| <i>FOS</i>     | c-MAF_2529 (-19836), c-MAF_3338 (-157)                                                                                                           |
| <i>FOSB</i>    | c-MAF_776 (-21599), c-MAF_822 (+10992)                                                                                                           |
| <i>FOSL1</i>   | c-MAF_1515 (-1720)                                                                                                                               |
| <i>FOSL2</i>   | c-MAF_2972 (-116557), c-MAF_3116 (-33368), c-MAF_6152 (+14020), c-MAF_585 (+17682), c-MAF_5491 (+32267), c-MAF_2993 (+52593), c-MAF_910 (+72839) |

|               |                                                                                                                                                                                                                    |
|---------------|--------------------------------------------------------------------------------------------------------------------------------------------------------------------------------------------------------------------|
| <i>FOXBI</i>  | c-MAF_1478 (-84646), c-MAF_4653 (+2183), c-MAF_3313 (+13770), c-MAF_2145 (+40747)                                                                                                                                  |
| <i>FOXC1</i>  | c-MAF_3944 (-83123), c-MAF_3863 (-57969), c-MAF_4504 (+176520)                                                                                                                                                     |
| <i>FOXD1</i>  | c-MAF_4886 (+60700)                                                                                                                                                                                                |
| <i>FOXEI</i>  | c-MAF_3949 (+53622)                                                                                                                                                                                                |
| <i>FOXE3</i>  | c-MAF_2392 (-64477)                                                                                                                                                                                                |
| <i>FOXF2</i>  | c-MAF_3944 (+137489), c-MAF_3863 (+162643)                                                                                                                                                                         |
| <i>FOXI1</i>  | c-MAF_6545 (+173008)                                                                                                                                                                                               |
| <i>FOXI2</i>  | c-MAF_1910 (+141405)                                                                                                                                                                                               |
| <i>FOXJ1</i>  | c-MAF_6048 (-96843), c-MAF_419 (-50814)                                                                                                                                                                            |
| <i>FOXJ2</i>  | c-MAF_1299 (-71780), c-MAF_2250 (-62063), c-MAF_4400 (-42552), c-MAF_6337 (+25421)                                                                                                                                 |
| <i>FOXK1</i>  | c-MAF_4015 (+56904), c-MAF_1230 (+63889)                                                                                                                                                                           |
| <i>FOXK2</i>  | c-MAF_6556 (+69838)                                                                                                                                                                                                |
| <i>FOXLI</i>  | c-MAF_1235 (+86229)                                                                                                                                                                                                |
| <i>FOXN3</i>  | c-MAF_5003 (-2338)                                                                                                                                                                                                 |
| <i>FOXO1</i>  | c-MAF_5919 (-98673), c-MAF_4121 (+12675), c-MAF_1433 (+56100), c-MAF_3477 (+60766), c-MAF_5495 (+180698)                                                                                                           |
| <i>FOXO3</i>  | c-MAF_6068 (-2035), c-MAF_3261 (+3558), c-MAF_1900 (+20605), c-MAF_737 (+37514), c-MAF_6146 (+90005)                                                                                                               |
| <i>FOXO6</i>  | c-MAF_1077 (-28363)                                                                                                                                                                                                |
| <i>FOXP1</i>  | c-MAF_867 (+1721), c-MAF_829 (+43091), c-MAF_2799 (+67027), c-MAF_467 (+119743), c-MAF_2185 (+148036), c-MAF_1626 (+155894)                                                                                        |
| <i>FOXP3</i>  | c-MAF_6445 (-88)                                                                                                                                                                                                   |
| <i>FOXP4</i>  | c-MAF_5909 (+14304)                                                                                                                                                                                                |
| <i>FPGS</i>   | c-MAF_2761 (-14004), c-MAF_6239 (+33120)                                                                                                                                                                           |
| <i>FRAT1</i>  | c-MAF_4547 (-256)                                                                                                                                                                                                  |
| <i>FRMD4A</i> | c-MAF_4198 (-59527)                                                                                                                                                                                                |
| <i>FRMD4B</i> | c-MAF_3023 (+58970), c-MAF_5791 (+80870), c-MAF_2839 (+173401)                                                                                                                                                     |
| <i>FRMD8</i>  | c-MAF_4887 (+33634), c-MAF_2310 (+85716)                                                                                                                                                                           |
| <i>FRS2</i>   | c-MAF_1300 (+64264)                                                                                                                                                                                                |
| <i>FRY</i>    | c-MAF_1746 (+121870)                                                                                                                                                                                               |
| <i>FRYL</i>   | c-MAF_5587 (-12117), c-MAF_5999 (+80644), c-MAF_5236 (+126807)                                                                                                                                                     |
| <i>FSCN1</i>  | c-MAF_6617 (-14260), c-MAF_2276 (+49322), c-MAF_3905 (+108595), c-MAF_1416 (+111744)                                                                                                                               |
| <i>FTH1</i>   | c-MAF_1674 (-58048)                                                                                                                                                                                                |
| <i>FTSJ3</i>  | c-MAF_681 (+73)                                                                                                                                                                                                    |
| <i>FUCA2</i>  | c-MAF_6170 (-135759), c-MAF_1255 (-117681), c-MAF_6778 (-95646), c-MAF_3066 (-55500), c-MAF_2005 (-43522), c-MAF_5793 (-38234), c-MAF_2526 (-34558), c-MAF_6095 (+120)                                             |
| <i>FURIN</i>  | c-MAF_1942 (-60668), c-MAF_153 (-53130), c-MAF_61 (-38423), c-MAF_615 (-30344), c-MAF_2544 (-23276), c-MAF_110 (-15644), c-MAF_57 (-11651), c-MAF_6577 (+1316), c-MAF_4773 (+4264)                                 |
| <i>FUT8</i>   | c-MAF_6613 (-169270), c-MAF_3538 (-122754), c-MAF_6190 (+140779), c-MAF_2952 (+156563)                                                                                                                             |
| <i>FXN</i>    | c-MAF_4684 (+622), c-MAF_969 (+9823), c-MAF_317 (+133824)                                                                                                                                                          |
| <i>FYB</i>    | c-MAF_4493 (+38874), c-MAF_5803 (+60653), c-MAF_5713 (+67725), c-MAF_1554 (+82473)                                                                                                                                 |
| <i>FYCOI</i>  | c-MAF_414 (+1904), c-MAF_96 (+18866), c-MAF_2428 (+22906), c-MAF_5571 (+31508), c-MAF_4050 (+39834)                                                                                                                |
| <i>FYN</i>    | c-MAF_1007 (-170013), c-MAF_5735 (+2122), c-MAF_2948 (+26775), c-MAF_5835 (+54548), c-MAF_290 (+68636), c-MAF_6627 (+84369), c-MAF_4884 (+108981), c-MAF_3774 (+111379), c-MAF_437 (+113281), c-MAF_2588 (+122279) |
| <i>FZD3</i>   | c-MAF_4637 (-93222), c-MAF_5989 (+23208)                                                                                                                                                                           |
| <i>FZD4</i>   | c-MAF_5199 (+149324)                                                                                                                                                                                               |
| <i>FZD5</i>   | c-MAF_4449 (+46407)                                                                                                                                                                                                |
| <i>FZD6</i>   | c-MAF_6350 (+37845)                                                                                                                                                                                                |
| <i>G0S2</i>   | c-MAF_1083 (-15286)                                                                                                                                                                                                |



|                |                                                                                                                                                                        |
|----------------|------------------------------------------------------------------------------------------------------------------------------------------------------------------------|
| <i>G3BP1</i>   | c-MAF_6296 (-22148)                                                                                                                                                    |
| <i>G3BP2</i>   | c-MAF_4340 (+1603), c-MAF_3481 (+18302)                                                                                                                                |
| <i>GAB2</i>    | c-MAF_2880 (-142591), c-MAF_4733 (-35924), c-MAF_3243 (+38438), c-MAF_6494 (+77763), c-MAF_1835 (+125494)                                                              |
| <i>GAB3</i>    | c-MAF_2568 (+16749), c-MAF_1227 (+25807), c-MAF_199 (+31544)                                                                                                           |
| <i>GAB4</i>    | c-MAF_1314 (-67653)                                                                                                                                                    |
| <i>GABPB1</i>  | c-MAF_1155 (+65425), c-MAF_5316 (+79858)                                                                                                                               |
| <i>GADD45A</i> | c-MAF_63 (-816), c-MAF_4083 (+15824)                                                                                                                                   |
| <i>GADD45B</i> | c-MAF_5298 (-226), c-MAF_6193 (+2728), c-MAF_2770 (+77001), c-MAF_4373 (+131973), c-MAF_2122 (+151610)                                                                 |
| <i>GADD45G</i> | c-MAF_777 (-126996), c-MAF_4120 (-102662), c-MAF_263 (+759), c-MAF_334 (+85737), c-MAF_1072 (+96435), c-MAF_4727 (+101303), c-MAF_5404 (+105903), c-MAF_1776 (+110334) |
| <i>GADL1</i>   | c-MAF_2065 (-182605)                                                                                                                                                   |
| <i>GAGE2D</i>  | c-MAF_4461 (-77229)                                                                                                                                                    |
| <i>GAL</i>     | c-MAF_4104 (-141541)                                                                                                                                                   |
| <i>GAL3ST2</i> | c-MAF_3668 (-36862), c-MAF_319 (-17404), c-MAF_21 (-14010), c-MAF_2829 (-4534)                                                                                         |
| <i>GALM</i>    | c-MAF_5394 (-56968), c-MAF_491 (-12038), c-MAF_70 (+1283), c-MAF_5009 (+43677), c-MAF_3787 (+56773)                                                                    |
| <i>GALNT10</i> | c-MAF_3885 (-146277), c-MAF_706 (-130966), c-MAF_238 (+31141), c-MAF_3322 (+82547)                                                                                     |
| <i>GALNT2</i>  | c-MAF_5084 (+37749)                                                                                                                                                    |
| <i>GALNT4</i>  | c-MAF_4032 (+29773), c-MAF_3365 (+148880), c-MAF_373 (+161537)                                                                                                         |
| <i>GALNT6</i>  | c-MAF_2537 (-10731)                                                                                                                                                    |
| <i>GALR2</i>   | c-MAF_4787 (-3058)                                                                                                                                                     |
| <i>GARNL3</i>  | c-MAF_1477 (+124047)                                                                                                                                                   |
| <i>GART</i>    | c-MAF_217 (-23898), c-MAF_3584 (+8)                                                                                                                                    |
| <i>GATA3</i>   | c-MAF_4911 (+78682), c-MAF_3416 (+82269), c-MAF_6449 (+128611)                                                                                                         |
| <i>GATA4</i>   | c-MAF_106 (-145282)                                                                                                                                                    |
| <i>GBAS</i>    | c-MAF_2132 (+35815)                                                                                                                                                    |
| <i>GBF1</i>    | c-MAF_4859 (+168)                                                                                                                                                      |
| <i>GBGT1</i>   | c-MAF_6461 (+19591)                                                                                                                                                    |
| <i>GBP2</i>    | c-MAF_3675 (-4033), c-MAF_2070 (-79)                                                                                                                                   |
| <i>GBP5</i>    | c-MAF_6392 (-1591)                                                                                                                                                     |
| <i>GCC2</i>    | c-MAF_1877 (+132624), c-MAF_2670 (+163953), c-MAF_227 (+170611)                                                                                                        |
| <i>GCH1</i>    | c-MAF_4303 (+129356), c-MAF_5746 (+172299)                                                                                                                             |
| <i>GCLM</i>    | c-MAF_6221 (+5049)                                                                                                                                                     |
| <i>GCM1</i>    | c-MAF_875 (-158233), c-MAF_3740 (-83031), c-MAF_5348 (-39697)                                                                                                          |
| <i>GCNIL1</i>  | c-MAF_5349 (-223), c-MAF_1479 (+68037)                                                                                                                                 |
| <i>GCNT1</i>   | c-MAF_753 (+187), c-MAF_1934 (+121003), c-MAF_2123 (+134899)                                                                                                           |
| <i>GCNT4</i>   | c-MAF_894 (+95563)                                                                                                                                                     |
| <i>GDA</i>     | c-MAF_4596 (+155827)                                                                                                                                                   |
| <i>GDE1</i>    | c-MAF_1138 (+4466)                                                                                                                                                     |
| <i>GDF11</i>   | c-MAF_1580 (-4502)                                                                                                                                                     |
| <i>GDF7</i>    | c-MAF_1796 (+92863), c-MAF_1076 (+152438)                                                                                                                              |
| <i>GDI2</i>    | c-MAF_4669 (-664)                                                                                                                                                      |
| <i>GDNF</i>    | c-MAF_3466 (+96649), c-MAF_4772 (+112826)                                                                                                                              |
| <i>GDPD1</i>   | c-MAF_3540 (+67201)                                                                                                                                                    |
| <i>GDPD4</i>   | c-MAF_3172 (+135116)                                                                                                                                                   |
| <i>GDPD5</i>   | c-MAF_6448 (-8522)                                                                                                                                                     |

|                |                                                                                                                                                   |
|----------------|---------------------------------------------------------------------------------------------------------------------------------------------------|
| <i>GET4</i>    | c-MAF_1819 (+53665)                                                                                                                               |
| <i>GF11</i>    | c-MAF_1381 (-100682), c-MAF_4756 (-93798), c-MAF_459 (-53237), c-MAF_1248 (-2854), c-MAF_3072 (+117962), c-MAF_2017 (+150024), c-MAF_99 (+167826) |
| <i>GFOD1</i>   | c-MAF_3093 (+32755), c-MAF_739 (+59119)                                                                                                           |
| <i>GFRA2</i>   | c-MAF_5180 (+101087)                                                                                                                              |
| <i>GFRA4</i>   | c-MAF_6615 (-13390)                                                                                                                               |
| <i>GHDC</i>    | c-MAF_1723 (-75386)                                                                                                                               |
| <i>GHITM</i>   | c-MAF_6203 (-143458)                                                                                                                              |
| <i>GHRL</i>    | c-MAF_5229 (+8146)                                                                                                                                |
| <i>GIF</i>     | c-MAF_488 (-19763), c-MAF_1067 (-12745)                                                                                                           |
| <i>GIMAP1</i>  | c-MAF_6426 (-362)                                                                                                                                 |
| <i>GIMAP2</i>  | c-MAF_4767 (-16907), c-MAF_5678 (-9160)                                                                                                           |
| <i>GIMAP4</i>  | c-MAF_192 (+43204)                                                                                                                                |
| <i>GIMAP5</i>  | c-MAF_2357 (+11215), c-MAF_6564 (+18335)                                                                                                          |
| <i>GIMAP6</i>  | c-MAF_5678 (-44155), c-MAF_4767 (-36408), c-MAF_192 (+21904)                                                                                      |
| <i>GIMAP7</i>  | c-MAF_761 (-11098)                                                                                                                                |
| <i>GIMAP8</i>  | c-MAF_379 (-1631), c-MAF_761 (+53102)                                                                                                             |
| <i>GIN1</i>    | c-MAF_1902 (+2528)                                                                                                                                |
| <i>GIPC1</i>   | c-MAF_5383 (-14645)                                                                                                                               |
| <i>GIPC2</i>   | c-MAF_5944 (+33927)                                                                                                                               |
| <i>GJA10</i>   | c-MAF_4495 (-59227), c-MAF_2124 (+114568), c-MAF_6409 (+131561), c-MAF_1380 (+150688)                                                             |
| <i>GJA3</i>    | c-MAF_5030 (+1246)                                                                                                                                |
| <i>GJB6</i>    | c-MAF_4847 (-127029)                                                                                                                              |
| <i>GK</i>      | c-MAF_5914 (-9718), c-MAF_6276 (+891), c-MAF_690 (+59974)                                                                                         |
| <i>GK5</i>     | c-MAF_2244 (-45098)                                                                                                                               |
| <i>GLB1L</i>   | c-MAF_2917 (-4106)                                                                                                                                |
| <i>GLCC11</i>  | c-MAF_6648 (-24013), c-MAF_6438 (+76212), c-MAF_3790 (+145715), c-MAF_6612 (+157233), c-MAF_3621 (+160665), c-MAF_344 (+165651)                   |
| <i>GLCE</i>    | c-MAF_4242 (-126130), c-MAF_6567 (-56151)                                                                                                         |
| <i>GLDC</i>    | c-MAF_5582 (+40306)                                                                                                                               |
| <i>GLG1</i>    | c-MAF_1948 (+43218)                                                                                                                               |
| <i>GLI2</i>    | c-MAF_6737 (-59401)                                                                                                                               |
| <i>GLIPR2</i>  | c-MAF_6249 (+15201)                                                                                                                               |
| <i>GLIS1</i>   | c-MAF_3074 (-49161), c-MAF_4923 (-32892)                                                                                                          |
| <i>GLIS3</i>   | c-MAF_1601 (-6727), c-MAF_5304 (-2453)                                                                                                            |
| <i>GLMN</i>    | c-MAF_3072 (-67016), c-MAF_2017 (-34954), c-MAF_99 (-17152)                                                                                       |
| <i>GLO1</i>    | c-MAF_384 (-10947)                                                                                                                                |
| <i>GLRA3</i>   | c-MAF_2222 (+147308)                                                                                                                              |
| <i>GLRX</i>    | c-MAF_4445 (-105430), c-MAF_4156 (-39423), c-MAF_6508 (-268), c-MAF_2944 (+61771)                                                                 |
| <i>GLRX3</i>   | c-MAF_1728 (+2316)                                                                                                                                |
| <i>GLRX5</i>   | c-MAF_1675 (-31042), c-MAF_1223 (-16040)                                                                                                          |
| <i>GLS</i>     | c-MAF_453 (-157627), c-MAF_1602 (-89202), c-MAF_4321 (-42219), c-MAF_1534 (-36599)                                                                |
| <i>GLTSCR1</i> | c-MAF_6601 (-12029)                                                                                                                               |
| <i>GLUD1</i>   | c-MAF_1151 (+825), c-MAF_3624 (+10861)                                                                                                            |
| <i>GLYAT</i>   | c-MAF_2840 (+104840)                                                                                                                              |
| <i>GMCL1</i>   | c-MAF_3888 (-59376), c-MAF_4658 (-12558)                                                                                                          |

|                |                                                                                                                             |
|----------------|-----------------------------------------------------------------------------------------------------------------------------|
| <i>GMDS</i>    | c-MAF_4822 (+83865), c-MAF_259 (+134313), c-MAF_1013 (+164085)                                                              |
| <i>GMPR</i>    | c-MAF_6762 (+81587), c-MAF_1532 (+84363), c-MAF_4901 (+93300)                                                               |
| <i>GMPR2</i>   | c-MAF_862 (+1907)                                                                                                           |
| <i>GNAI2</i>   | c-MAF_2198 (-167327), c-MAF_4055 (+81192), c-MAF_142 (+85953)                                                               |
| <i>GNAI3</i>   | c-MAF_3429 (-64681), c-MAF_3356 (-62716), c-MAF_1872 (+8784), c-MAF_2729 (+71587), c-MAF_2926 (+80975), c-MAF_3822 (+87542) |
| <i>GNAI4</i>   | c-MAF_5063 (+181360)                                                                                                        |
| <i>GNAI5</i>   | c-MAF_1755 (-2647), c-MAF_5158 (+6029), c-MAF_6676 (+18975)                                                                 |
| <i>GNAI2</i>   | c-MAF_6139 (-8125), c-MAF_3312 (+10977)                                                                                     |
| <i>GNAT1</i>   | c-MAF_6139 (+36214)                                                                                                         |
| <i>GNAZ</i>    | c-MAF_672 (-57975)                                                                                                          |
| <i>GNBIL</i>   | c-MAF_5651 (-751)                                                                                                           |
| <i>GNGI2</i>   | c-MAF_4083 (+132582)                                                                                                        |
| <i>GNG4</i>    | c-MAF_6721 (-84537)                                                                                                         |
| <i>GNG5</i>    | c-MAF_2523 (-66607)                                                                                                         |
| <i>GNG7</i>    | c-MAF_2122 (+74972), c-MAF_4373 (+94609), c-MAF_2770 (+149581)                                                              |
| <i>GNGT2</i>   | c-MAF_1608 (+17568)                                                                                                         |
| <i>GNL1</i>    | c-MAF_3792 (-298)                                                                                                           |
| <i>GNL2</i>    | c-MAF_2172 (+19296)                                                                                                         |
| <i>GNLY</i>    | c-MAF_3853 (+10972)                                                                                                         |
| <i>GNPAT</i>   | c-MAF_2711 (+31111)                                                                                                         |
| <i>GNPDA1</i>  | c-MAF_6499 (-40932), c-MAF_4582 (-12169), c-MAF_1234 (-3339)                                                                |
| <i>GNPNAT1</i> | c-MAF_6620 (-127060)                                                                                                        |
| <i>GNPTAB</i>  | c-MAF_4310 (-35233), c-MAF_3115 (+37490)                                                                                    |
| <i>GNRH2</i>   | c-MAF_2429 (-158966)                                                                                                        |
| <i>GNRHR</i>   | c-MAF_221 (+27004)                                                                                                          |
| <i>GNS</i>     | c-MAF_5212 (+93565)                                                                                                         |
| <i>GOLGA1</i>  | c-MAF_6561 (-531), c-MAF_4480 (+70733)                                                                                      |
| <i>GOLGA5</i>  | c-MAF_659 (-25890), c-MAF_4253 (-23586), c-MAF_3826 (-18636)                                                                |
| <i>GOLGA7</i>  | c-MAF_6559 (-76421)                                                                                                         |
| <i>GOLGA7B</i> | c-MAF_2600 (+3010)                                                                                                          |
| <i>GOLGA8I</i> | c-MAF_5350 (-162673)                                                                                                        |
| <i>GOLM1</i>   | c-MAF_4399 (+2924), c-MAF_3215 (+134377)                                                                                    |
| <i>GOLPH3</i>  | c-MAF_2502 (-123240)                                                                                                        |
| <i>GON4L</i>   | c-MAF_2879 (-634), c-MAF_6226 (+113861)                                                                                     |
| <i>GOPC</i>    | c-MAF_5183 (+2163), c-MAF_1207 (+53247)                                                                                     |
| <i>GORASP1</i> | c-MAF_6039 (+25471)                                                                                                         |
| <i>GPATCH2</i> | c-MAF_4708 (+5)                                                                                                             |
| <i>GPBAR1</i>  | c-MAF_3626 (-42152)                                                                                                         |
| <i>GPBP1</i>   | c-MAF_1597 (+102850), c-MAF_2011 (+114049)                                                                                  |
| <i>GPDIL</i>   | c-MAF_1088 (+7314)                                                                                                          |
| <i>GPD2</i>    | c-MAF_1219 (-91901)                                                                                                         |
| <i>GPIHBP1</i> | c-MAF_6351 (-22292)                                                                                                         |
| <i>GPNI</i>    | c-MAF_4146 (+9226)                                                                                                          |
| <i>GPR101</i>  | c-MAF_6514 (-20628)                                                                                                         |

|                |                                                                                                                                                                         |
|----------------|-------------------------------------------------------------------------------------------------------------------------------------------------------------------------|
| <i>GPR107</i>  | c-MAF_1999 (-1343), c-MAF_426 (+54372), c-MAF_2415 (+75853), c-MAF_3552 (+90470)                                                                                        |
| <i>GPR112</i>  | c-MAF_1458 (-41119)                                                                                                                                                     |
| <i>GPR114</i>  | c-MAF_3870 (-3884), c-MAF_6282 (+48674), c-MAF_3644 (+59548), c-MAF_1773 (+67189)                                                                                       |
| <i>GPR135</i>  | c-MAF_1174 (+163733)                                                                                                                                                    |
| <i>GPR137B</i> | c-MAF_3615 (+1250), c-MAF_1384 (+14351), c-MAF_1306 (+26271)                                                                                                            |
| <i>GPR137C</i> | c-MAF_6252 (-617)                                                                                                                                                       |
| <i>GPR143</i>  | c-MAF_872 (+88612)                                                                                                                                                      |
| <i>GPR146</i>  | c-MAF_2119 (-11053)                                                                                                                                                     |
| <i>GPR148</i>  | c-MAF_2572 (-1010)                                                                                                                                                      |
| <i>GPR15</i>   | c-MAF_617 (+24170)                                                                                                                                                      |
| <i>GPR155</i>  | c-MAF_262 (-129026), c-MAF_6319 (-121342), c-MAF_1071 (-113574)                                                                                                         |
| <i>GPR171</i>  | c-MAF_1368 (-58)                                                                                                                                                        |
| <i>GPR174</i>  | c-MAF_6563 (-74771), c-MAF_1526 (+88247)                                                                                                                                |
| <i>GPR18</i>   | c-MAF_2356 (+4892), c-MAF_4088 (+47197)                                                                                                                                 |
| <i>GPR180</i>  | c-MAF_3124 (+65464)                                                                                                                                                     |
| <i>GPR183</i>  | c-MAF_3689 (-129880), c-MAF_125 (-127230), c-MAF_2433 (-54031), c-MAF_2687 (-50089), c-MAF_4265 (-3216)                                                                 |
| <i>GPR19</i>   | c-MAF_1939 (-13822), c-MAF_5879 (+28478), c-MAF_1976 (+70971)                                                                                                           |
| <i>GPR20</i>   | c-MAF_4707 (+127997)                                                                                                                                                    |
| <i>GPR25</i>   | c-MAF_4814 (+146584)                                                                                                                                                    |
| <i>GPR34</i>   | c-MAF_5228 (-170729), c-MAF_2448 (-161948), c-MAF_970 (-131825), c-MAF_1536 (-129301), c-MAF_660 (-127675)                                                              |
| <i>GPR35</i>   | c-MAF_5928 (+16302), c-MAF_3211 (+19737), c-MAF_5702 (+50913)                                                                                                           |
| <i>GPR4</i>    | c-MAF_4890 (-40290)                                                                                                                                                     |
| <i>GPR42</i>   | c-MAF_534 (+32547), c-MAF_842 (+65828)                                                                                                                                  |
| <i>GPR55</i>   | c-MAF_5388 (-60704), c-MAF_2302 (-55516), c-MAF_4602 (-31975), c-MAF_949 (+5370), c-MAF_3987 (+16449), c-MAF_1036 (+25211)                                              |
| <i>GPR56</i>   | c-MAF_6282 (-37144), c-MAF_3644 (-26270), c-MAF_1773 (-18629)                                                                                                           |
| <i>GPR65</i>   | c-MAF_6565 (+12525), c-MAF_5109 (+24659), c-MAF_1419 (+39879)                                                                                                           |
| <i>GPR68</i>   | c-MAF_3648 (-162248), c-MAF_5142 (-134608), c-MAF_964 (-117363), c-MAF_5813 (-108625), c-MAF_3890 (-97045), c-MAF_5613 (-7372), c-MAF_1767 (+11963), c-MAF_172 (+23953) |
| <i>GPR84</i>   | c-MAF_3420 (-10794)                                                                                                                                                     |
| <i>GPR87</i>   | c-MAF_3058 (+11489), c-MAF_3037 (+15012), c-MAF_729 (+32704)                                                                                                            |
| <i>GPR88</i>   | c-MAF_2299 (-96244)                                                                                                                                                     |
| <i>GPSM3</i>   | c-MAF_4224 (-3088)                                                                                                                                                      |
| <i>GPT2</i>    | c-MAF_87 (+65084)                                                                                                                                                       |
| <i>GPX1</i>    | c-MAF_1276 (+6838)                                                                                                                                                      |
| <i>GPX3</i>    | c-MAF_6731 (+46667)                                                                                                                                                     |
| <i>GPX4</i>    | c-MAF_6726 (+28472)                                                                                                                                                     |
| <i>GPX8</i>    | c-MAF_2950 (-25743), c-MAF_1527 (-17990)                                                                                                                                |
| <i>GRAMD1B</i> | c-MAF_3218 (-87071), c-MAF_1528 (-74274), c-MAF_2924 (-71450), c-MAF_6414 (+18075)                                                                                      |
| <i>GRAMD3</i>  | c-MAF_5283 (+86532)                                                                                                                                                     |
| <i>GRAMD4</i>  | c-MAF_3814 (+41233), c-MAF_2260 (+54218), c-MAF_1591 (+114737)                                                                                                          |
| <i>GRAP2</i>   | c-MAF_3756 (-60808), c-MAF_3967 (+9244), c-MAF_5393 (+19311), c-MAF_6764 (+25276), c-MAF_2712 (+60563)                                                                  |
| <i>GRB10</i>   | c-MAF_3922 (-100637), c-MAF_5710 (+137968)                                                                                                                              |
| <i>GRB2</i>    | c-MAF_5052 (-23503), c-MAF_1576 (+33420), c-MAF_5358 (+89510)                                                                                                           |
| <i>GRB7</i>    | c-MAF_683 (+19436), c-MAF_1008 (+31295), c-MAF_2571 (+46557), c-MAF_3162 (+56219), c-MAF_3666 (+80727)                                                                  |

|                 |                                                                                                                                                                                                                                                                                               |
|-----------------|-----------------------------------------------------------------------------------------------------------------------------------------------------------------------------------------------------------------------------------------------------------------------------------------------|
| <i>GREM1</i>    | c-MAF_588 (+159874)                                                                                                                                                                                                                                                                           |
| <i>GRHL3</i>    | c-MAF_1918 (+67091)                                                                                                                                                                                                                                                                           |
| <i>GRID1</i>    | c-MAF_1102 (-45080)                                                                                                                                                                                                                                                                           |
| <i>GRID2IP</i>  | c-MAF_2054 (+17084)                                                                                                                                                                                                                                                                           |
| <i>GRIK4</i>    | c-MAF_1247 (-167221)                                                                                                                                                                                                                                                                          |
| <i>GRIN2A</i>   | c-MAF_5446 (-150870), c-MAF_3914 (-147015)                                                                                                                                                                                                                                                    |
| <i>GRK5</i>     | c-MAF_5069 (+43146), c-MAF_5343 (+61585), c-MAF_2226 (+98581), c-MAF_4716 (+108027)                                                                                                                                                                                                           |
| <i>GRK6</i>     | c-MAF_5844 (+5607)                                                                                                                                                                                                                                                                            |
| <i>GRK7</i>     | c-MAF_4010 (+18849)                                                                                                                                                                                                                                                                           |
| <i>GRM4</i>     | c-MAF_3386 (-49301)                                                                                                                                                                                                                                                                           |
| <i>GRPEL2</i>   | c-MAF_562 (+3253)                                                                                                                                                                                                                                                                             |
| <i>GRSF1</i>    | c-MAF_4898 (+105331)                                                                                                                                                                                                                                                                          |
| <i>GSAP</i>     | c-MAF_2055 (+62895)                                                                                                                                                                                                                                                                           |
| <i>GSC</i>      | c-MAF_5257 (+64895)                                                                                                                                                                                                                                                                           |
| <i>GSDMC</i>    | c-MAF_5669 (-151672)                                                                                                                                                                                                                                                                          |
| <i>GSDMD</i>    | c-MAF_29 (-5856)                                                                                                                                                                                                                                                                              |
| <i>GSE1</i>     | c-MAF_4947 (-58964)                                                                                                                                                                                                                                                                           |
| <i>GSG1L</i>    | c-MAF_3163 (-77719)                                                                                                                                                                                                                                                                           |
| <i>GSG2</i>     | c-MAF_3166 (-12785), c-MAF_4656 (+67800), c-MAF_5101 (+72675)                                                                                                                                                                                                                                 |
| <i>GSK3A</i>    | c-MAF_4765 (-440)                                                                                                                                                                                                                                                                             |
| <i>GSKIP</i>    | c-MAF_1775 (-1449)                                                                                                                                                                                                                                                                            |
| <i>GSN</i>      | c-MAF_3193 (+54070)                                                                                                                                                                                                                                                                           |
| <i>GSR</i>      | c-MAF_4375 (+76), c-MAF_159 (+4827), c-MAF_3118 (+7583)                                                                                                                                                                                                                                       |
| <i>GSTA3</i>    | c-MAF_793 (-74866)                                                                                                                                                                                                                                                                            |
| <i>GSTA4</i>    | c-MAF_3955 (-53176), c-MAF_599 (-46969), c-MAF_3078 (+93), c-MAF_793 (+10827)                                                                                                                                                                                                                 |
| <i>GSTO2</i>    | c-MAF_4629 (+40), c-MAF_6012 (+60200)                                                                                                                                                                                                                                                         |
| <i>GTDC1</i>    | c-MAF_11 (-157805), c-MAF_812 (-130198), c-MAF_6767 (-88549), c-MAF_326 (-83570), c-MAF_181 (-79877), c-MAF_55 (-63709), c-MAF_682 (-56079), c-MAF_6732 (-47199), c-MAF_1337 (-38315), c-MAF_465 (-30971), c-MAF_5145 (+32377), c-MAF_1069 (+80591), c-MAF_725 (+93121), c-MAF_6451 (+166144) |
| <i>GTDC2</i>    | c-MAF_5558 (-137774), c-MAF_5090 (-127738), c-MAF_2446 (-74169)                                                                                                                                                                                                                               |
| <i>GTF2A1</i>   | c-MAF_32 (-180592), c-MAF_5339 (-169912)                                                                                                                                                                                                                                                      |
| <i>GTF2E2</i>   | c-MAF_159 (-64848), c-MAF_3118 (-62092)                                                                                                                                                                                                                                                       |
| <i>GTF2H5</i>   | c-MAF_3683 (+32865), c-MAF_1421 (+43405), c-MAF_4157 (+116323)                                                                                                                                                                                                                                |
| <i>GTF2I</i>    | c-MAF_4365 (-87825), c-MAF_1030 (-7385), c-MAF_3767 (-178), c-MAF_5830 (+3384)                                                                                                                                                                                                                |
| <i>GTF2IRD1</i> | c-MAF_4365 (+115886)                                                                                                                                                                                                                                                                          |
| <i>GTF3C5</i>   | c-MAF_2293 (+17728)                                                                                                                                                                                                                                                                           |
| <i>GUCA1A</i>   | c-MAF_4655 (-55584)                                                                                                                                                                                                                                                                           |
| <i>GUCA1C</i>   | c-MAF_5649 (-118097), c-MAF_3627 (+118755)                                                                                                                                                                                                                                                    |
| <i>GUCY1A2</i>  | c-MAF_5010 (-22905)                                                                                                                                                                                                                                                                           |
| <i>GUCY1A3</i>  | c-MAF_2439 (-27359)                                                                                                                                                                                                                                                                           |
| <i>GUCY2D</i>   | c-MAF_4553 (-46751)                                                                                                                                                                                                                                                                           |
| <i>GXYLT2</i>   | c-MAF_2300 (+89245)                                                                                                                                                                                                                                                                           |
| <i>GYG1</i>     | c-MAF_6268 (+9129)                                                                                                                                                                                                                                                                            |
| <i>GZF1</i>     | c-MAF_6400 (+37787), c-MAF_4435 (+55645)                                                                                                                                                                                                                                                      |
| <i>GZMA</i>     | c-MAF_4233 (-40413), c-MAF_2950 (+31727), c-MAF_1527 (+39480)                                                                                                                                                                                                                                 |
| <i>GZMB</i>     | c-MAF_5970 (-44858), c-MAF_68 (-39528), c-MAF_2353 (-31346), c-MAF_1212 (-2147)                                                                                                                                                                                                               |

|               |                                                                                                                            |
|---------------|----------------------------------------------------------------------------------------------------------------------------|
| <i>GZMH</i>   | c-MAF_2423 (+2451)                                                                                                         |
| <i>GZMK</i>   | c-MAF_4233 (+37982)                                                                                                        |
| <i>H1FOO</i>  | c-MAF_1798 (+33717)                                                                                                        |
| <i>H2AFJ</i>  | c-MAF_636 (-3293)                                                                                                          |
| <i>H2AFY2</i> | c-MAF_6133 (+40772)                                                                                                        |
| <i>H2AFZ</i>  | c-MAF_4284 (+981)                                                                                                          |
| <i>H3F3C</i>  | c-MAF_280 (-166915), c-MAF_1355 (-104583), c-MAF_5499 (-98545), c-MAF_3859 (+45272), c-MAF_5920 (+58255)                   |
| <i>HABP4</i>  | c-MAF_3798 (+28914)                                                                                                        |
| <i>HACE1</i>  | c-MAF_1771 (+71348)                                                                                                        |
| <i>HACLI</i>  | c-MAF_4535 (-86065), c-MAF_6690 (-34565)                                                                                   |
| <i>HADH</i>   | c-MAF_2533 (+860)                                                                                                          |
| <i>HADHA</i>  | c-MAF_913 (+175914), c-MAF_1694 (+182723)                                                                                  |
| <i>HAGHL</i>  | c-MAF_3635 (+8983)                                                                                                         |
| <i>HAUS5</i>  | c-MAF_5472 (-36954)                                                                                                        |
| <i>HAVCR1</i> | c-MAF_2284 (-42075), c-MAF_3204 (+32972)                                                                                   |
| <i>HAVCR2</i> | c-MAF_714 (+670), c-MAF_2284 (+9163)                                                                                       |
| <i>HAX1</i>   | c-MAF_3458 (+35497)                                                                                                        |
| <i>HBP1</i>   | c-MAF_4416 (-690)                                                                                                          |
| <i>HBSIL</i>  | c-MAF_2301 (-59702)                                                                                                        |
| <i>HCAR2</i>  | c-MAF_4558 (+158731)                                                                                                       |
| <i>HCN1</i>   | c-MAF_4638 (-98116)                                                                                                        |
| <i>HCN2</i>   | c-MAF_4323 (+21770)                                                                                                        |
| <i>HCST</i>   | c-MAF_645 (-3433)                                                                                                          |
| <i>HDAC1</i>  | c-MAF_1622 (-38286), c-MAF_2847 (-34961), c-MAF_5083 (-24861), c-MAF_5379 (+30105)                                         |
| <i>HDAC4</i>  | c-MAF_2745 (+120511), c-MAF_503 (+125520), c-MAF_846 (+133495), c-MAF_1716 (+166247)                                       |
| <i>HDAC5</i>  | c-MAF_1665 (-36130)                                                                                                        |
| <i>HDAC7</i>  | c-MAF_2050 (-71721), c-MAF_2103 (-65495), c-MAF_2996 (-47954), c-MAF_756 (+6832)                                           |
| <i>HDAC9</i>  | c-MAF_1923 (+143052), c-MAF_522 (+152896)                                                                                  |
| <i>HDC</i>    | c-MAF_1155 (-23702), c-MAF_5316 (-9269), c-MAF_1282 (+5440), c-MAF_6061 (+16748)                                           |
| <i>HDHD3</i>  | c-MAF_2573 (+25130)                                                                                                        |
| <i>HDLBP</i>  | c-MAF_2866 (-37189), c-MAF_5815 (-32788)                                                                                   |
| <i>HEATR1</i> | c-MAF_2514 (+70062)                                                                                                        |
| <i>HECA</i>   | c-MAF_3089 (-106461), c-MAF_724 (-8730), c-MAF_4484 (+1632), c-MAF_5352 (+27155), c-MAF_50 (+118285), c-MAF_3248 (+122352) |
| <i>HECTD1</i> | c-MAF_2135 (-170712), c-MAF_4334 (-956)                                                                                    |
| <i>HECTD2</i> | c-MAF_3510 (+5652)                                                                                                         |
| <i>HEG1</i>   | c-MAF_5132 (+60112)                                                                                                        |
| <i>HELQ</i>   | c-MAF_4420 (+98411)                                                                                                        |
| <i>HELT</i>   | c-MAF_1240 (-173137)                                                                                                       |
| <i>HELZ</i>   | c-MAF_1341 (-12829)                                                                                                        |
| <i>HEMK1</i>  | c-MAF_6328 (+4549), c-MAF_5416 (+32184)                                                                                    |
| <i>HENMT1</i> | c-MAF_3502 (+14583)                                                                                                        |
| <i>HEPH</i>   | c-MAF_5681 (-115513)                                                                                                       |
| <i>HERC1</i>  | c-MAF_1945 (-63009), c-MAF_2495 (-59061), c-MAF_3845 (+9), c-MAF_1962 (+81794)                                             |
| <i>HERC5</i>  | c-MAF_372 (-74317)                                                                                                         |

|                              |                                                                                                                                                     |
|------------------------------|-----------------------------------------------------------------------------------------------------------------------------------------------------|
| <i>HERC6</i>                 | c-MAF_2652 (+560), c-MAF_372 (+3936)                                                                                                                |
| <i>HES1</i>                  | c-MAF_3654 (-171927), c-MAF_1190 (-46415)                                                                                                           |
| <i>HES2</i>                  | c-MAF_5647 (+26273)                                                                                                                                 |
| <i>HES7</i>                  | c-MAF_3185 (-27261), c-MAF_4549 (-15157)                                                                                                            |
| <i>HEYL</i>                  | c-MAF_6742 (-27091)                                                                                                                                 |
| <i>HFE2</i>                  | c-MAF_1492 (-30356), c-MAF_2519 (-16447)                                                                                                            |
| <i>HHAT</i>                  | c-MAF_4933 (+45396)                                                                                                                                 |
| <i>HHEX</i>                  | c-MAF_6002 (-43542), c-MAF_5823 (+2365)                                                                                                             |
| <i>HIC1</i>                  | c-MAF_6338 (-2441), c-MAF_3682 (+31505), c-MAF_3594 (+136580), c-MAF_5913 (+139708)                                                                 |
| <i>HIF1A</i>                 | c-MAF_1570 (-172104), c-MAF_3094 (-134559), c-MAF_298 (-34900)                                                                                      |
| <i>HIGD1C</i>                | c-MAF_5799 (+25972)                                                                                                                                 |
| <i>HINT1</i>                 | c-MAF_3803 (+1590)                                                                                                                                  |
| <i>HINT3</i>                 | c-MAF_4408 (-166996), c-MAF_625 (-51728), c-MAF_2221 (-41058)                                                                                       |
| <i>HIP1</i>                  | c-MAF_2746 (-37800)                                                                                                                                 |
| <i>HIPK2</i>                 | c-MAF_4020 (+111767)                                                                                                                                |
| <i>HIRIP3</i>                | c-MAF_5881 (+894)                                                                                                                                   |
| <i>HIST1H1A</i>              | c-MAF_3270 (-2734)                                                                                                                                  |
| <i>HIST1H2AC</i>             | c-MAF_5926 (-974)                                                                                                                                   |
| <i>HIST1H2AD</i>             | c-MAF_4626 (-905)                                                                                                                                   |
| <i>HIST1H2BB</i>             | c-MAF_2505 (+206)                                                                                                                                   |
| <i>HIST1H2BC</i>             | c-MAF_5926 (+681)                                                                                                                                   |
| <i>HIST1H2BD</i>             | c-MAF_6604 (+457)                                                                                                                                   |
| <i>HIST1H2BF</i>             | c-MAF_4626 (+628)                                                                                                                                   |
| <i>HIST1H2BL</i>             | c-MAF_1267 (-3198), c-MAF_1566 (+35276), c-MAF_3810 (+54868)                                                                                        |
| <i>HIST1H2BM</i>             | c-MAF_1267 (-3915)                                                                                                                                  |
| <i>HIST1H2BO</i>             | c-MAF_4879 (-2668)                                                                                                                                  |
| <i>HIST1H3A</i>              | c-MAF_3270 (+56)                                                                                                                                    |
| <i>HIST1H3C</i>              | c-MAF_2505 (-1960)                                                                                                                                  |
| <i>HIST1H3D</i>              | c-MAF_4626 (-855)                                                                                                                                   |
| <i>HIST1H3J</i>              | c-MAF_4879 (+35)                                                                                                                                    |
| <i>HIST1H4A</i>              | c-MAF_3270 (-1133)                                                                                                                                  |
| <i>HIST1H4B</i>              | c-MAF_1345 (+672)                                                                                                                                   |
| <i>HIST1H4E</i>              | c-MAF_4626 (-4482)                                                                                                                                  |
| <i>HIST1H4H</i>              | c-MAF_5967 (-19386), c-MAF_6504 (-11063)                                                                                                            |
| <i>HIST1H4J</i>              | c-MAF_6031 (+1075)                                                                                                                                  |
| <i>HIST1H4K</i>              | c-MAF_6031 (+6346)                                                                                                                                  |
| <i>HIST2H2AA</i><br><i>4</i> | c-MAF_5910 (-1880)                                                                                                                                  |
| <i>HIST2H3A</i>              | c-MAF_5910 (-3418)                                                                                                                                  |
| <i>HIST3H2A</i>              | c-MAF_6184 (+661)                                                                                                                                   |
| <i>HIST3H2BB</i>             | c-MAF_6184 (-909), c-MAF_528 (+7847), c-MAF_6171 (+21566)                                                                                           |
| <i>HIST4H4</i>               | c-MAF_636 (+88)                                                                                                                                     |
| <i>HIVEP1</i>                | c-MAF_3079 (-1204), c-MAF_6240 (+99210)                                                                                                             |
| <i>HIVEP2</i>                | c-MAF_5398 (+59637), c-MAF_4791 (+73236), c-MAF_6384 (+88158), c-MAF_3384 (+102276), c-MAF_407 (+125053), c-MAF_6334 (+133879), c-MAF_297 (+171704) |
| <i>HIVEP3</i>                | c-MAF_2053 (+20059), c-MAF_824 (+107047), c-MAF_3102 (+167029), c-MAF_2721 (+177029)                                                                |

|                  |                                                                                                                          |
|------------------|--------------------------------------------------------------------------------------------------------------------------|
| <i>HK1</i>       | c-MAF_6019 (-66101), c-MAF_912 (-63731), c-MAF_3751 (+70587)                                                             |
| <i>HK3</i>       | c-MAF_6164 (-16934), c-MAF_457 (-2559), c-MAF_6316 (-297)                                                                |
| <i>HKDC1</i>     | c-MAF_1130 (-5214), c-MAF_6019 (+2340), c-MAF_912 (+4710)                                                                |
| <i>HLA-A</i>     | c-MAF_2565 (+23766)                                                                                                      |
| <i>HLA-C</i>     | c-MAF_6205 (+68033), c-MAF_5233 (+73896)                                                                                 |
| <i>HLA-DQA1</i>  | c-MAF_4608 (-14111)                                                                                                      |
| <i>HLA-DRB1</i>  | c-MAF_4608 (-33398)                                                                                                      |
| <i>HLA-E</i>     | c-MAF_14 (-38472), c-MAF_6107 (-35783), c-MAF_4348 (-25767), c-MAF_1061 (-157), c-MAF_1650 (+27257), c-MAF_2788 (+38729) |
| <i>HLCS</i>      | c-MAF_821 (+56366), c-MAF_6532 (+63540)                                                                                  |
| <i>HLF</i>       | c-MAF_929 (-175501), c-MAF_5958 (-171451), c-MAF_4648 (-27600)                                                           |
| <i>HLTF</i>      | c-MAF_6268 (+86060)                                                                                                      |
| <i>HMBOX1</i>    | c-MAF_3005 (+46728)                                                                                                      |
| <i>HMCN1</i>     | c-MAF_5242 (-172757), c-MAF_4407 (-97462)                                                                                |
| <i>HMGAI</i>     | c-MAF_3386 (-53906)                                                                                                      |
| <i>HMGCR</i>     | c-MAF_6491 (+159170)                                                                                                     |
| <i>HMGNI</i>     | c-MAF_5444 (+2122)                                                                                                       |
| <i>HMOX1</i>     | c-MAF_6571 (-8732), c-MAF_1903 (-3703)                                                                                   |
| <i>HMOX2</i>     | c-MAF_1854 (-9763)                                                                                                       |
| <i>HNRNP42B1</i> | c-MAF_1724 (+3073), c-MAF_4455 (+46839)                                                                                  |
| <i>HNRNPAB</i>   | c-MAF_6489 (+1110)                                                                                                       |
| <i>HNRNPC</i>    | c-MAF_1977 (+5027), c-MAF_3383 (+20328)                                                                                  |
| <i>HNRNPF</i>    | c-MAF_4742 (-24010)                                                                                                      |
| <i>HNRNPH2</i>   | c-MAF_4279 (+22251)                                                                                                      |
| <i>HNRNPL</i>    | c-MAF_1594 (-14485)                                                                                                      |
| <i>HNRNPLL</i>   | c-MAF_491 (-50843), c-MAF_5394 (-5913), c-MAF_3457 (-360), c-MAF_5247 (+127635)                                          |
| <i>HNRNPUL1</i>  | c-MAF_6078 (-1982), c-MAF_1136 (+63483)                                                                                  |
| <i>HOMER1</i>    | c-MAF_5167 (-389)                                                                                                        |
| <i>HOMER2</i>    | c-MAF_2087 (+141503)                                                                                                     |
| <i>HOPX</i>      | c-MAF_4172 (-81268), c-MAF_2327 (+26759), c-MAF_1737 (+33205)                                                            |
| <i>HORMAD2</i>   | c-MAF_3698 (+24512), c-MAF_519 (+81139), c-MAF_2612 (+110546)                                                            |
| <i>HOXA1</i>     | c-MAF_5438 (-379)                                                                                                        |
| <i>HOXB1</i>     | c-MAF_6204 (+47462), c-MAF_712 (+52425), c-MAF_1590 (+71678), c-MAF_4957 (+89459)                                        |
| <i>HOXB3</i>     | c-MAF_5610 (-24354)                                                                                                      |
| <i>HOXB4</i>     | c-MAF_5610 (+1835)                                                                                                       |
| <i>HPCAL1</i>    | c-MAF_1783 (-179687), c-MAF_4457 (-5565), c-MAF_1320 (+28765)                                                            |
| <i>HPDL</i>      | c-MAF_1051 (-79995)                                                                                                      |
| <i>HPGD</i>      | c-MAF_2222 (-159108), c-MAF_4719 (-15460), c-MAF_4462 (+159), c-MAF_4008 (+99342), c-MAF_2907 (+163873)                  |
| <i>HPRT1</i>     | c-MAF_2927 (-85026), c-MAF_589 (+162283), c-MAF_3866 (+165383)                                                           |
| <i>HPSE</i>      | c-MAF_4420 (-22292), c-MAF_1574 (+41322)                                                                                 |
| <i>HRH1</i>      | c-MAF_5364 (-13685)                                                                                                      |
| <i>HRH2</i>      | c-MAF_2320 (-4711)                                                                                                       |
| <i>HS3ST1</i>    | c-MAF_4126 (-59759)                                                                                                      |
| <i>HS3ST3B1</i>  | c-MAF_4441 (-99710), c-MAF_2447 (-1639), c-MAF_1140 (+36821), c-MAF_4932 (+50653)                                        |
| <i>HS6ST1</i>    | c-MAF_6120 (-154827), c-MAF_4394 (-3487)                                                                                 |



|                 |                                                                                                                                                  |
|-----------------|--------------------------------------------------------------------------------------------------------------------------------------------------|
| <i>HSD17B3</i>  | c-MAF_2098 (+145647), c-MAF_740 (+151516)                                                                                                        |
| <i>HSD17B4</i>  | c-MAF_5249 (-84069), c-MAF_6525 (-54774)                                                                                                         |
| <i>HSF2BP</i>   | c-MAF_4095 (+148584)                                                                                                                             |
| <i>HSF4</i>     | c-MAF_4133 (-3673)                                                                                                                               |
| <i>HSH2D</i>    | c-MAF_5876 (-23908)                                                                                                                              |
| <i>HSP90AA1</i> | c-MAF_3345 (-44736), c-MAF_3646 (-7254)                                                                                                          |
| <i>HSP90AB1</i> | c-MAF_3418 (-1235)                                                                                                                               |
| <i>HSP90B1</i>  | c-MAF_4228 (+660)                                                                                                                                |
| <i>HSPA13</i>   | c-MAF_1507 (-163113), c-MAF_999 (-150867), c-MAF_408 (-140292), c-MAF_2935 (-99193), c-MAF_122 (-70420), c-MAF_6084 (+24)                        |
| <i>HSPA14</i>   | c-MAF_4427 (-186)                                                                                                                                |
| <i>HSPA1B</i>   | c-MAF_5325 (+2688)                                                                                                                               |
| <i>HSPA2</i>    | c-MAF_3392 (-17935)                                                                                                                              |
| <i>HSPA6</i>    | c-MAF_211 (+15748)                                                                                                                               |
| <i>HSPA9</i>    | c-MAF_4574 (-79110)                                                                                                                              |
| <i>HSPB1</i>    | c-MAF_4789 (+45573)                                                                                                                              |
| <i>HSPBP1</i>   | c-MAF_1290 (+3699)                                                                                                                               |
| <i>HSPD1</i>    | c-MAF_3998 (+20)                                                                                                                                 |
| <i>HSPE1</i>    | c-MAF_3998 (+33)                                                                                                                                 |
| <i>HSPH1</i>    | c-MAF_899 (+115935)                                                                                                                              |
| <i>HTR1F</i>    | c-MAF_1987 (+28542)                                                                                                                              |
| <i>HTR2B</i>    | c-MAF_4388 (-52412), c-MAF_538 (-43206), c-MAF_71 (-36960)                                                                                       |
| <i>HTR4</i>     | c-MAF_1961 (-154079)                                                                                                                             |
| <i>HTR5A</i>    | c-MAF_3013 (+135415)                                                                                                                             |
| <i>HTR6</i>     | c-MAF_2462 (+100446)                                                                                                                             |
| <i>HTR7</i>     | c-MAF_1908 (+10163)                                                                                                                              |
| <i>HTRA1</i>    | c-MAF_4472 (+80319)                                                                                                                              |
| <i>HTRA3</i>    | c-MAF_1664 (-41003)                                                                                                                              |
| <i>HTRA4</i>    | c-MAF_4386 (-70391), c-MAF_4792 (-35494)                                                                                                         |
| <i>HTT</i>      | c-MAF_5604 (+127422)                                                                                                                             |
| <i>HUS1B</i>    | c-MAF_2227 (+108668), c-MAF_4161 (+150341), c-MAF_5207 (+154565), c-MAF_231 (+166407)                                                            |
| <i>HUWE1</i>    | c-MAF_4479 (-29944)                                                                                                                              |
| <i>HVCN1</i>    | c-MAF_3568 (+69093)                                                                                                                              |
| <i>IAH1</i>     | c-MAF_291 (-10795)                                                                                                                               |
| <i>ICA1</i>     | c-MAF_1488 (-122733), c-MAF_2399 (+85235), c-MAF_344 (+127835), c-MAF_3621 (+132821), c-MAF_6612 (+136253), c-MAF_3790 (+147771)                 |
| <i>ICAM1</i>    | c-MAF_1143 (-167)                                                                                                                                |
| <i>ICAM2</i>    | c-MAF_2515 (+21641)                                                                                                                              |
| <i>ICK</i>      | c-MAF_3955 (+13248), c-MAF_599 (+19455)                                                                                                          |
| <i>ICOS</i>     | c-MAF_3479 (-65006), c-MAF_5217 (-53761), c-MAF_260 (-45224), c-MAF_1935 (-42471), c-MAF_2807 (-39006), c-MAF_5282 (-2467), c-MAF_3032 (+113057) |
| <i>ICOSLG</i>   | c-MAF_3310 (+19998), c-MAF_6697 (+44579)                                                                                                         |
| <i>ID2</i>      | c-MAF_1648 (-163619), c-MAF_3187 (-142045), c-MAF_657 (-134951), c-MAF_800 (-101860), c-MAF_3482 (-98204), c-MAF_1080 (+721)                     |
| <i>IDE</i>      | c-MAF_1750 (+272)                                                                                                                                |
| <i>IDH2</i>     | c-MAF_6584 (+854)                                                                                                                                |
| <i>ID11</i>     | c-MAF_2430 (+515)                                                                                                                                |
| <i>IER3</i>     | c-MAF_3526 (-75006), c-MAF_2167 (-43597), c-MAF_2073 (-24851), c-MAF_4481 (+107)                                                                 |

|                |                                                                                                                            |
|----------------|----------------------------------------------------------------------------------------------------------------------------|
| <i>IFFO2</i>   | c-MAF_2410 (+29959)                                                                                                        |
| <i>IFI16</i>   | c-MAF_2027 (+135), c-MAF_5738 (+2697)                                                                                      |
| <i>IFI44</i>   | c-MAF_1103 (-3839)                                                                                                         |
| <i>IFIT1B</i>  | c-MAF_3664 (-43800), c-MAF_5107 (-40327)                                                                                   |
| <i>IFIT3</i>   | c-MAF_3664 (+6362), c-MAF_5107 (+9835)                                                                                     |
| <i>IFITM10</i> | c-MAF_1068 (+21443)                                                                                                        |
| <i>IFITM3</i>  | c-MAF_6753 (-21361)                                                                                                        |
| <i>IFLTD1</i>  | c-MAF_5696 (-36814), c-MAF_232 (+164803)                                                                                   |
| <i>IFNAR2</i>  | c-MAF_5390 (-29869), c-MAF_5318 (-14177), c-MAF_6130 (+1720), c-MAF_2587 (+8856)                                           |
| <i>IFNG</i>    | c-MAF_1763 (-30187), c-MAF_5790 (+22164), c-MAF_1781 (+39795), c-MAF_2312 (+127887)                                        |
| <i>IFNGR1</i>  | c-MAF_1167 (-169870), c-MAF_4356 (-144529), c-MAF_5201 (-20858), c-MAF_6194 (+493)                                         |
| <i>IFNL2</i>   | c-MAF_2644 (-9992)                                                                                                         |
| <i>IFNL3</i>   | c-MAF_2644 (-13516)                                                                                                        |
| <i>IFRD1</i>   | c-MAF_2735 (-853)                                                                                                          |
| <i>IFT140</i>  | c-MAF_5043 (+52327)                                                                                                        |
| <i>IFT20</i>   | c-MAF_3678 (+7867)                                                                                                         |
| <i>IFT57</i>   | c-MAF_3276 (+97990)                                                                                                        |
| <i>IFT80</i>   | c-MAF_4217 (-16136)                                                                                                        |
| <i>IGF1</i>    | c-MAF_1909 (-55795), c-MAF_720 (+917)                                                                                      |
| <i>IGF2</i>    | c-MAF_1668 (+63730)                                                                                                        |
| <i>IGF2BP3</i> | c-MAF_4616 (+52216)                                                                                                        |
| <i>IGF2R</i>   | c-MAF_5235 (+7820), c-MAF_1445 (+10253), c-MAF_5480 (+131607)                                                              |
| <i>IGFBP4</i>  | c-MAF_4295 (+37490)                                                                                                        |
| <i>IGFBP6</i>  | c-MAF_4922 (+1041)                                                                                                         |
| <i>IGLL5</i>   | c-MAF_672 (+124605)                                                                                                        |
| <i>IGLON5</i>  | c-MAF_4230 (-39321)                                                                                                        |
| <i>IGSF3</i>   | c-MAF_88 (-70296)                                                                                                          |
| <i>IKBKB</i>   | c-MAF_1342 (-5049), c-MAF_4187 (+21734), c-MAF_5053 (+29185)                                                               |
| <i>IKBKE</i>   | c-MAF_5535 (-28113), c-MAF_105 (-13238)                                                                                    |
| <i>IKZF1</i>   | c-MAF_288 (-43510), c-MAF_1793 (+70108)                                                                                    |
| <i>IKZF2</i>   | c-MAF_3566 (+30833), c-MAF_6458 (+181918)                                                                                  |
| <i>IKZF3</i>   | c-MAF_3666 (+44690), c-MAF_3162 (+69198), c-MAF_2571 (+78860), c-MAF_1008 (+94122), c-MAF_683 (+105981)                    |
| <i>IL10</i>    | c-MAF_2 (-12072), c-MAF_22 (-136), c-MAF_3087 (+35362), c-MAF_2513 (+59254), c-MAF_3948 (+65767)                           |
| <i>IL10RA</i>  | c-MAF_3639 (-26747), c-MAF_4801 (+890), c-MAF_43 (+17181), c-MAF_5194 (+22047)                                             |
| <i>IL10RB</i>  | c-MAF_6130 (-34664), c-MAF_2587 (-27528)                                                                                   |
| <i>IL12B</i>   | c-MAF_5192 (-81568), c-MAF_1936 (-14668)                                                                                   |
| <i>IL12RB2</i> | c-MAF_738 (-136236), c-MAF_6254 (-95069), c-MAF_654 (+25920), c-MAF_4129 (+28170), c-MAF_5426 (+32467)                     |
| <i>IL13</i>    | c-MAF_1074 (-28456), c-MAF_1443 (-22121), c-MAF_3492 (-16617), c-MAF_4229 (-214)                                           |
| <i>IL15</i>    | c-MAF_3670 (+1075)                                                                                                         |
| <i>IL15RA</i>  | c-MAF_2375 (-75111), c-MAF_3723 (-67812)                                                                                   |
| <i>IL16</i>    | c-MAF_6631 (+68694)                                                                                                        |
| <i>IL17A</i>   | c-MAF_3945 (-33577), c-MAF_4369 (-28672), c-MAF_924 (-5441), c-MAF_5842 (+26877), c-MAF_4320 (+35138), c-MAF_4128 (+41270) |
| <i>IL17C</i>   | c-MAF_2322 (-46760), c-MAF_6643 (-41899), c-MAF_3100 (-18507)                                                              |
| <i>IL17F</i>   | c-MAF_2279 (-9179), c-MAF_4128 (+16880), c-MAF_4320 (+23012), c-MAF_5842 (+31273)                                          |

|                |                                                                                                                                                                        |
|----------------|------------------------------------------------------------------------------------------------------------------------------------------------------------------------|
| <i>IL17RA</i>  | c-MAF_1314 (-9084), c-MAF_6112 (+2814)                                                                                                                                 |
| <i>IL17RC</i>  | c-MAF_4116 (-4532)                                                                                                                                                     |
| <i>IL17RE</i>  | c-MAF_2955 (-436)                                                                                                                                                      |
| <i>IL18BP</i>  | c-MAF_5269 (-36366), c-MAF_6614 (+41736)                                                                                                                               |
| <i>IL18R1</i>  | c-MAF_4802 (-18063), c-MAF_2309 (+405), c-MAF_1791 (+11711), c-MAF_6501 (+35866)                                                                                       |
| <i>IL18RAP</i> | c-MAF_1791 (-51049), c-MAF_6501 (-26894), c-MAF_6062 (-135)                                                                                                            |
| <i>IL19</i>    | c-MAF_2 (-14304), c-MAF_137 (-47)                                                                                                                                      |
| <i>IL1A</i>    | c-MAF_6168 (-36859), c-MAF_5901 (-19799), c-MAF_1160 (-9767)                                                                                                           |
| <i>IL1B</i>    | c-MAF_6168 (+15454), c-MAF_5901 (+32514), c-MAF_1160 (+42546)                                                                                                          |
| <i>IL1R1</i>   | c-MAF_1302 (-80201), c-MAF_206 (-59605), c-MAF_4463 (-5497)                                                                                                            |
| <i>IL1R2</i>   | c-MAF_1302 (+70739), c-MAF_206 (+91335), c-MAF_4463 (+145443)                                                                                                          |
| <i>IL1RAP</i>  | c-MAF_967 (+49266), c-MAF_1882 (+63357), c-MAF_3630 (+72770)                                                                                                           |
| <i>IL1RL1</i>  | c-MAF_1060 (-83612), c-MAF_1991 (-52605), c-MAF_4759 (-9555), c-MAF_1163 (-6664), c-MAF_4802 (+26364)                                                                  |
| <i>IL1RL2</i>  | c-MAF_1060 (+40917), c-MAF_1991 (+71924), c-MAF_4759 (+114974), c-MAF_1163 (+117865)                                                                                   |
| <i>IL1RN</i>   | c-MAF_6616 (-1571)                                                                                                                                                     |
| <i>IL2</i>     | c-MAF_1093 (-160550), c-MAF_2771 (-86341), c-MAF_3795 (-51065)                                                                                                         |
| <i>IL20RA</i>  | c-MAF_4338 (-121172)                                                                                                                                                   |
| <i>IL20RB</i>  | c-MAF_2785 (-37886)                                                                                                                                                    |
| <i>IL21</i>    | c-MAF_4874 (-89795), c-MAF_1880 (-69068), c-MAF_4811 (-37619), c-MAF_4100 (-14371), c-MAF_1535 (-11985), c-MAF_1093 (+3794), c-MAF_2771 (+78003), c-MAF_3795 (+113279) |
| <i>IL21R</i>   | c-MAF_6292 (-83658)                                                                                                                                                    |
| <i>IL22</i>    | c-MAF_1538 (-36694), c-MAF_3840 (-28293), c-MAF_3043 (-14577), c-MAF_2120 (-325), c-MAF_3295 (+17016), c-MAF_3250 (+19353)                                             |
| <i>IL22RA2</i> | c-MAF_4338 (+7512)                                                                                                                                                     |
| <i>IL23R</i>   | c-MAF_4895 (-3300), c-MAF_738 (+4728), c-MAF_6254 (+45895)                                                                                                             |
| <i>IL26</i>    | c-MAF_3295 (-10770), c-MAF_3250 (-8433), c-MAF_1729 (-83), c-MAF_1763 (+35887)                                                                                         |
| <i>IL2RA</i>   | c-MAF_1712 (-21471), c-MAF_2378 (-7200), c-MAF_1551 (-23), c-MAF_2375 (+9624), c-MAF_3723 (+16923)                                                                     |
| <i>IL2RB</i>   | c-MAF_3545 (-73), c-MAF_3206 (+27669)                                                                                                                                  |
| <i>IL3</i>     | c-MAF_3104 (-37426), c-MAF_5543 (-4405), c-MAF_1588 (-1173)                                                                                                            |
| <i>IL31RA</i>  | c-MAF_3255 (+5265), c-MAF_4720 (+17407), c-MAF_854 (+126704)                                                                                                           |
| <i>IL32</i>    | c-MAF_3846 (+95), c-MAF_5994 (+11783)                                                                                                                                  |
| <i>IL33</i>    | c-MAF_3391 (-172602)                                                                                                                                                   |
| <i>IL4</i>     | c-MAF_563 (-42), c-MAF_6588 (+40759)                                                                                                                                   |
| <i>IL4I1</i>   | c-MAF_2116 (+659)                                                                                                                                                      |
| <i>IL4R</i>    | c-MAF_6292 (+4591)                                                                                                                                                     |
| <i>IL5</i>     | c-MAF_5774 (-3989), c-MAF_1556 (+14091)                                                                                                                                |
| <i>IL6</i>     | c-MAF_5676 (-160479)                                                                                                                                                   |
| <i>IL6R</i>    | c-MAF_3370 (-6834), c-MAF_2052 (+2296), c-MAF_3194 (+26598), c-MAF_6270 (+34567), c-MAF_4275 (+61232)                                                                  |
| <i>IL6ST</i>   | c-MAF_3990 (-63489), c-MAF_5377 (-17650), c-MAF_854 (+16783), c-MAF_4720 (+126080), c-MAF_3255 (+138222)                                                               |
| <i>IL7</i>     | c-MAF_622 (-35218), c-MAF_5629 (+618)                                                                                                                                  |
| <i>IL7R</i>    | c-MAF_4168 (-4300), c-MAF_5883 (+20879)                                                                                                                                |
| <i>IL8</i>     | c-MAF_5987 (-78864), c-MAF_5770 (-28395), c-MAF_4994 (-21758), c-MAF_2923 (-5139), c-MAF_205 (+74842)                                                                  |
| <i>ILDR2</i>   | c-MAF_4718 (+64593)                                                                                                                                                    |
| <i>IMMT</i>    | c-MAF_3098 (-3552)                                                                                                                                                     |
| <i>IMPA2</i>   | c-MAF_4052 (-33997)                                                                                                                                                    |
| <i>IMPACT</i>  | c-MAF_1214 (-12008)                                                                                                                                                    |

|                |                                                                                                                                                                        |
|----------------|------------------------------------------------------------------------------------------------------------------------------------------------------------------------|
| <i>IMPAD1</i>  | c-MAF_389 (-6585), c-MAF_3820 (+22771)                                                                                                                                 |
| <i>INA</i>     | c-MAF_6539 (-13456)                                                                                                                                                    |
| <i>INCENP</i>  | c-MAF_1674 (-98265)                                                                                                                                                    |
| <i>ING1</i>    | c-MAF_5745 (-1574), c-MAF_5185 (+155435)                                                                                                                               |
| <i>ING2</i>    | c-MAF_1149 (+58965), c-MAF_4312 (+79711)                                                                                                                               |
| <i>INHBB</i>   | c-MAF_4533 (-88522)                                                                                                                                                    |
| <i>INO80E</i>  | c-MAF_5881 (+248)                                                                                                                                                      |
| <i>INPP4A</i>  | c-MAF_4690 (-5906), c-MAF_1347 (+1343), c-MAF_5809 (+3766), c-MAF_2860 (+9901), c-MAF_4550 (+19025), c-MAF_5644 (+34791), c-MAF_2360 (+60881), c-MAF_4590 (+63978)     |
| <i>INPP5A</i>  | c-MAF_5482 (+2257), c-MAF_1449 (+128459)                                                                                                                               |
| <i>INPP5D</i>  | c-MAF_4238 (+68854), c-MAF_2218 (+149498)                                                                                                                              |
| <i>INPP5F</i>  | c-MAF_3339 (-62183), c-MAF_2842 (-20487), c-MAF_4092 (+76318), c-MAF_1502 (+111016)                                                                                    |
| <i>INPPL1</i>  | c-MAF_3157 (-1292)                                                                                                                                                     |
| <i>INSIG1</i>  | c-MAF_3013 (-92037), c-MAF_6724 (-20050), c-MAF_898 (-642)                                                                                                             |
| <i>INSIG2</i>  | c-MAF_3655 (+89139)                                                                                                                                                    |
| <i>INSL5</i>   | c-MAF_415 (+68388)                                                                                                                                                     |
| <i>INSM1</i>   | c-MAF_1457 (+112685), c-MAF_5568 (+114947), c-MAF_5724 (+120041), c-MAF_138 (+123362)                                                                                  |
| <i>INSM2</i>   | c-MAF_4997 (-117729)                                                                                                                                                   |
| <i>INSR</i>    | c-MAF_6507 (+96250)                                                                                                                                                    |
| <i>INTS10</i>  | c-MAF_3652 (-129915), c-MAF_5548 (-120382), c-MAF_6581 (-97241), c-MAF_6090 (+130)                                                                                     |
| <i>INTS4</i>   | c-MAF_3309 (+1)                                                                                                                                                        |
| <i>INVS</i>    | c-MAF_5512 (-40)                                                                                                                                                       |
| <i>IP6K2</i>   | c-MAF_5918 (-95161)                                                                                                                                                    |
| <i>IPCEF1</i>  | c-MAF_922 (+52134), c-MAF_4467 (+90564), c-MAF_1328 (+132631)                                                                                                          |
| <i>IPO7</i>    | c-MAF_575 (-42699), c-MAF_5962 (-37237), c-MAF_6729 (-22875)                                                                                                           |
| <i>IPO9</i>    | c-MAF_6118 (+53960)                                                                                                                                                    |
| <i>IPPK</i>    | c-MAF_5922 (+38313)                                                                                                                                                    |
| <i>IQGAP1</i>  | c-MAF_6231 (+12808), c-MAF_6251 (+26695)                                                                                                                               |
| <i>IQGAP2</i>  | c-MAF_2193 (-133507), c-MAF_973 (-77206), c-MAF_5579 (-71973), c-MAF_1543 (-1255), c-MAF_5739 (+47199), c-MAF_4883 (+70561), c-MAF_4810 (+139885), c-MAF_650 (+144338) |
| <i>IRAK1</i>   | c-MAF_5334 (-39146), c-MAF_2209 (+38046)                                                                                                                               |
| <i>IRAK2</i>   | c-MAF_2733 (+27314), c-MAF_1415 (+63863), c-MAF_295 (+77789)                                                                                                           |
| <i>IRF1</i>    | c-MAF_1556 (-38633), c-MAF_4654 (+63997)                                                                                                                               |
| <i>IRF2</i>    | c-MAF_3965 (-100572), c-MAF_6065 (-99284), c-MAF_393 (-39630), c-MAF_1656 (-3325), c-MAF_3712 (+52743)                                                                 |
| <i>IRF2BP2</i> | c-MAF_3634 (-149591), c-MAF_5487 (-122000), c-MAF_882 (-114480), c-MAF_2129 (-91005), c-MAF_2102 (+1255)                                                               |
| <i>IRF2BPL</i> | c-MAF_5711 (-12215), c-MAF_678 (+4240), c-MAF_4526 (+66693), c-MAF_790 (+71916)                                                                                        |
| <i>IRF4</i>    | c-MAF_5456 (+31264), c-MAF_1184 (+55138), c-MAF_3755 (+76221), c-MAF_231 (+98817), c-MAF_5207 (+110659), c-MAF_4161 (+114883), c-MAF_2227 (+156556)                    |
| <i>IRF5</i>    | c-MAF_1052 (-4611)                                                                                                                                                     |
| <i>IRF6</i>    | c-MAF_3438 (+36495)                                                                                                                                                    |
| <i>IRF7</i>    | c-MAF_4489 (+27596)                                                                                                                                                    |
| <i>IRF8</i>    | c-MAF_2350 (+37658)                                                                                                                                                    |
| <i>IRGM</i>    | c-MAF_2831 (-65578)                                                                                                                                                    |
| <i>IRS1</i>    | c-MAF_5226 (+17388)                                                                                                                                                    |
| <i>IRX4</i>    | c-MAF_5990 (+51089)                                                                                                                                                    |
| <i>IRX5</i>    | c-MAF_3983 (+16337)                                                                                                                                                    |

|                 |                                                                                                                              |
|-----------------|------------------------------------------------------------------------------------------------------------------------------|
| <i>ISCA1</i>    | c-MAF_3379 (-70089)                                                                                                          |
| <i>ISCA2</i>    | c-MAF_5916 (-989)                                                                                                            |
| <i>ISCU</i>     | c-MAF_3619 (+6413)                                                                                                           |
| <i>ISG20</i>    | c-MAF_4955 (+1514)                                                                                                           |
| <i>ISM1</i>     | c-MAF_2581 (+26225)                                                                                                          |
| <i>ISYNA1</i>   | c-MAF_86 (-43707), c-MAF_2085 (-40733), c-MAF_5606 (-37071)                                                                  |
| <i>ITCH</i>     | c-MAF_5424 (-28444), c-MAF_5231 (-12953)                                                                                     |
| <i>ITFG1</i>    | c-MAF_5162 (+29230)                                                                                                          |
| <i>ITGA1</i>    | c-MAF_989 (-78142), c-MAF_1640 (-43737)                                                                                      |
| <i>ITGA11</i>   | c-MAF_4698 (+143522), c-MAF_3097 (+146657)                                                                                   |
| <i>ITGA2</i>    | c-MAF_77 (+15848), c-MAF_3725 (+52130), c-MAF_2752 (+80470)                                                                  |
| <i>ITGA4</i>    | c-MAF_2854 (-18648), c-MAF_4615 (+11625)                                                                                     |
| <i>ITGA5</i>    | c-MAF_5985 (-4896)                                                                                                           |
| <i>ITGAE</i>    | c-MAF_5101 (+4651), c-MAF_4656 (+9526)                                                                                       |
| <i>ITGAM</i>    | c-MAF_1860 (+7502)                                                                                                           |
| <i>ITGAV</i>    | c-MAF_3844 (-14491), c-MAF_5338 (+1037)                                                                                      |
| <i>ITGAX</i>    | c-MAF_1860 (-87638), c-MAF_6160 (-3075)                                                                                      |
| <i>ITGB1</i>    | c-MAF_4506 (-176377), c-MAF_5462 (-152065)                                                                                   |
| <i>ITGB1BP1</i> | c-MAF_5870 (+178030)                                                                                                         |
| <i>ITGB2</i>    | c-MAF_3537 (+1220)                                                                                                           |
| <i>ITGB4</i>    | c-MAF_2603 (-30062)                                                                                                          |
| <i>ITGB5</i>    | c-MAF_1963 (+95581)                                                                                                          |
| <i>ITGB6</i>    | c-MAF_1308 (-132269)                                                                                                         |
| <i>ITGB7</i>    | c-MAF_1446 (-12080), c-MAF_4737 (+6584)                                                                                      |
| <i>ITGB8</i>    | c-MAF_6100 (-526)                                                                                                            |
| <i>ITIH5</i>    | c-MAF_4663 (+182357)                                                                                                         |
| <i>ITK</i>      | c-MAF_2876 (-8249), c-MAF_780 (+15319), c-MAF_3659 (+36674), c-MAF_3865 (+41924), c-MAF_5351 (+46740), c-MAF_3337 (+72245)   |
| <i>ITM2A</i>    | c-MAF_1526 (+108140)                                                                                                         |
| <i>ITM2C</i>    | c-MAF_4130 (-113621), c-MAF_5285 (-83266), c-MAF_5893 (-68336), c-MAF_1036 (+35115), c-MAF_3987 (+43877), c-MAF_949 (+54956) |
| <i>ITPKA</i>    | c-MAF_6598 (-39902), c-MAF_3745 (-27008)                                                                                     |
| <i>ITPKB</i>    | c-MAF_5044 (-59396), c-MAF_2534 (-24944), c-MAF_4225 (+10618), c-MAF_3891 (+51623), c-MAF_261 (+75957)                       |
| <i>ITPKC</i>    | c-MAF_3610 (-265)                                                                                                            |
| <i>ITPR3</i>    | c-MAF_4147 (+1501), c-MAF_4380 (+74329)                                                                                      |
| <i>ITPRIP</i>   | c-MAF_6012 (+4524)                                                                                                           |
| <i>ITPRIPL1</i> | c-MAF_2554 (-10425), c-MAF_5974 (-8564)                                                                                      |
| <i>ITPRIPL2</i> | c-MAF_2988 (+13348)                                                                                                          |
| <i>IVNS1ABP</i> | c-MAF_2622 (-122939)                                                                                                         |
| <i>IZUMO4</i>   | c-MAF_3737 (+51898)                                                                                                          |
| <i>JAG1</i>     | c-MAF_3543 (+75106)                                                                                                          |
| <i>JAK1</i>     | c-MAF_6642 (-42881)                                                                                                          |
| <i>JAK2</i>     | c-MAF_2355 (-151907), c-MAF_6345 (-14037), c-MAF_5250 (-2114)                                                                |
| <i>JARID2</i>   | c-MAF_200 (+1301), c-MAF_5533 (+7304), c-MAF_6757 (+84418)                                                                   |
| <i>JAZF1</i>    | c-MAF_6428 (-58931), c-MAF_5807 (+25658), c-MAF_4614 (+28594)                                                                |
| <i>JHDM1D</i>   | c-MAF_5356 (-149345), c-MAF_203 (-76103), c-MAF_2638 (-37526), c-MAF_3940 (-35719)                                           |

|                |                                                                                    |
|----------------|------------------------------------------------------------------------------------|
| <i>JMJD6</i>   | c-MAF_4009 (-391), c-MAF_4371 (+10242)                                             |
| <i>JMY</i>     | c-MAF_3687 (-6436)                                                                 |
| <i>JPH2</i>    | c-MAF_5011 (-13536)                                                                |
| <i>JUN</i>     | c-MAF_5834 (-145849), c-MAF_3834 (-1092)                                           |
| <i>JUNB</i>    | c-MAF_2819 (+2218)                                                                 |
| <i>JUND</i>    | c-MAF_4858 (-23131), c-MAF_2461 (-13160)                                           |
| <i>KANK1</i>   | c-MAF_5114 (-163129), c-MAF_1113 (-22608)                                          |
| <i>KANK2</i>   | c-MAF_6359 (+17441)                                                                |
| <i>KANSL1</i>  | c-MAF_6289 (+13266)                                                                |
| <i>KANSL3</i>  | c-MAF_3361 (+20851)                                                                |
| <i>KAT2B</i>   | c-MAF_1623 (+1466), c-MAF_3532 (+8283), c-MAF_48 (+17464), c-MAF_1298 (+64494)     |
| <i>KAT6A</i>   | c-MAF_6173 (-405)                                                                  |
| <i>KAT7</i>    | c-MAF_3762 (-73021), c-MAF_4002 (-48480), c-MAF_6398 (-39654)                      |
| <i>KATNAL1</i> | c-MAF_3638 (-69620)                                                                |
| <i>KATNB1</i>  | c-MAF_1439 (-295)                                                                  |
| <i>KBTD6</i>   | c-MAF_4838 (-47101)                                                                |
| <i>KBTD7</i>   | c-MAF_4838 (+14719)                                                                |
| <i>KBTD8</i>   | c-MAF_3212 (+1934)                                                                 |
| <i>KCMF1</i>   | c-MAF_2872 (-32711)                                                                |
| <i>KCNA2</i>   | c-MAF_3340 (-40053), c-MAF_5024 (-23957)                                           |
| <i>KCNA3</i>   | c-MAF_3340 (+27551), c-MAF_5024 (+43647)                                           |
| <i>KCNAB2</i>  | c-MAF_5690 (-17580)                                                                |
| <i>KCNB1</i>   | c-MAF_310 (-52570), c-MAF_3576 (+158742)                                           |
| <i>KCNC4</i>   | c-MAF_6744 (+3268)                                                                 |
| <i>KCNE1</i>   | c-MAF_4060 (-35516), c-MAF_4745 (-25709), c-MAF_757 (-15682)                       |
| <i>KCNG1</i>   | c-MAF_6554 (-105345), c-MAF_2468 (+42754)                                          |
| <i>KCNG2</i>   | c-MAF_6677 (-177410)                                                               |
| <i>KCNIP1</i>  | c-MAF_1274 (-37280)                                                                |
| <i>KCNIP2</i>  | c-MAF_2051 (+12312)                                                                |
| <i>KCNJ1</i>   | c-MAF_4986 (+58807), c-MAF_4969 (+85066), c-MAF_2082 (+94607), c-MAF_517 (+147018) |
| <i>KCNJ11</i>  | c-MAF_2848 (+19796)                                                                |
| <i>KCNJ12</i>  | c-MAF_5425 (-34805), c-MAF_5565 (-31864), c-MAF_2615 (+37406), c-MAF_5734 (+46083) |
| <i>KCNJ13</i>  | c-MAF_6229 (-62074)                                                                |
| <i>KCNK13</i>  | c-MAF_4186 (-101600)                                                               |
| <i>KCNK17</i>  | c-MAF_1499 (+50744)                                                                |
| <i>KCNK5</i>   | c-MAF_1499 (-34359), c-MAF_3307 (+7102)                                            |
| <i>KCNMA1</i>  | c-MAF_2342 (-164025), c-MAF_5111 (+135706)                                         |
| <i>KCNMB1</i>  | c-MAF_1274 (-77616), c-MAF_1906 (+58250)                                           |
| <i>KCNMB3</i>  | c-MAF_4889 (-64532), c-MAF_5000 (+70471)                                           |
| <i>KCNMB4</i>  | c-MAF_5825 (-48296)                                                                |
| <i>KCNN4</i>   | c-MAF_4967 (+4655), c-MAF_6460 (+15735)                                            |
| <i>KCNQ4</i>   | c-MAF_3455 (-72196)                                                                |
| <i>KCNS1</i>   | c-MAF_6394 (+130671)                                                               |
| <i>KCNV2</i>   | c-MAF_2580 (-78347), c-MAF_1748 (-61753), c-MAF_4829 (+47107)                      |
| <i>KCTD10</i>  | c-MAF_2765 (+19247)                                                                |

|                  |                                                                                                        |
|------------------|--------------------------------------------------------------------------------------------------------|
| <i>KCTD14</i>    | c-MAF_2673 (-16712)                                                                                    |
| <i>KCTD16</i>    | c-MAF_4568 (-15244)                                                                                    |
| <i>KCTD17</i>    | c-MAF_1768 (+28212), c-MAF_4664 (+43420)                                                               |
| <i>KCTD18</i>    | c-MAF_3583 (+30067), c-MAF_2171 (+53940)                                                               |
| <i>KCTD2</i>     | c-MAF_3633 (+18727)                                                                                    |
| <i>KCTD4</i>     | c-MAF_6187 (-57037)                                                                                    |
| <i>KCTD5</i>     | c-MAF_5786 (-18610)                                                                                    |
| <i>KCTD6</i>     | c-MAF_798 (-26312)                                                                                     |
| <i>KCTD7</i>     | c-MAF_1238 (-164938), c-MAF_988 (-109926)                                                              |
| <i>KDELC1</i>    | c-MAF_4660 (+19236)                                                                                    |
| <i>KDELR2</i>    | c-MAF_2054 (-50110)                                                                                    |
| <i>KDM1A</i>     | c-MAF_5271 (+89661)                                                                                    |
| <i>KDM2A</i>     | c-MAF_4012 (+121409)                                                                                   |
| <i>KDM2B</i>     | c-MAF_923 (-9817), c-MAF_1409 (+46330)                                                                 |
| <i>KDM3A</i>     | c-MAF_5432 (+268), c-MAF_420 (+143477)                                                                 |
| <i>KDM5D</i>     | c-MAF_3715 (+591)                                                                                      |
| <i>KDM6A</i>     | c-MAF_6668 (+29676)                                                                                    |
| <i>KDM6B</i>     | c-MAF_1019 (+2998)                                                                                     |
| <i>KDM8</i>      | c-MAF_6016 (-34126), c-MAF_5206 (-26508), c-MAF_5006 (+33763), c-MAF_6766 (+42057)                     |
| <i>KHDRBS1</i>   | c-MAF_1899 (-31747)                                                                                    |
| <i>KHSRP</i>     | c-MAF_6718 (-267)                                                                                      |
| <i>KIAA0020</i>  | c-MAF_3047 (+951), c-MAF_4829 (+79632)                                                                 |
| <i>KIAA0195</i>  | c-MAF_5052 (-27475)                                                                                    |
| <i>KIAA0247</i>  | c-MAF_2242 (+13969), c-MAF_6395 (+24771), c-MAF_381 (+63490), c-MAF_406 (+73878), c-MAF_4328 (+105139) |
| <i>KIAA0430</i>  | c-MAF_2018 (+32420), c-MAF_4353 (+52048)                                                               |
| <i>KIAA0513</i>  | c-MAF_4696 (-7520)                                                                                     |
| <i>KIAA0922</i>  | c-MAF_6356 (+31171)                                                                                    |
| <i>KIAA1033</i>  | c-MAF_2643 (-295), c-MAF_239 (+120916)                                                                 |
| <i>KIAA1279</i>  | c-MAF_887 (+57029), c-MAF_2959 (+59609), c-MAF_3156 (+66760), c-MAF_2636 (+74717)                      |
| <i>KIAA1324</i>  | c-MAF_5453 (-21862), c-MAF_5936 (+48476)                                                               |
| <i>KIAA1432</i>  | c-MAF_3560 (-1806)                                                                                     |
| <i>KIAA1549</i>  | c-MAF_4329 (+105278)                                                                                   |
| <i>KIAA1549L</i> | c-MAF_6698 (+148254), c-MAF_5058 (+180596)                                                             |
| <i>KIAA2013</i>  | c-MAF_5367 (+17935)                                                                                    |
| <i>KIF11</i>     | c-MAF_4255 (+581), c-MAF_6002 (+51360)                                                                 |
| <i>KIF13A</i>    | c-MAF_3001 (-127980)                                                                                   |
| <i>KIF13B</i>    | c-MAF_4904 (-29076), c-MAF_5284 (+33458), c-MAF_1199 (+91692), c-MAF_1920 (+167871)                    |
| <i>KIF14</i>     | c-MAF_6069 (+172251), c-MAF_4113 (+175350)                                                             |
| <i>KIF16B</i>    | c-MAF_1033 (-135696)                                                                                   |
| <i>KIF1B</i>     | c-MAF_3020 (-136228), c-MAF_1659 (+41098), c-MAF_2930 (+43079)                                         |
| <i>KIF21A</i>    | c-MAF_3272 (-177)                                                                                      |
| <i>KIF21B</i>    | c-MAF_4814 (+4161)                                                                                     |
| <i>KIF24</i>     | c-MAF_2921 (+142781)                                                                                   |
| <i>KIF25</i>     | c-MAF_4080 (-167445), c-MAF_896 (-141933)                                                              |

|                |                                                                                                                                                                                                                                                                |
|----------------|----------------------------------------------------------------------------------------------------------------------------------------------------------------------------------------------------------------------------------------------------------------|
| <i>KIF2A</i>   | c-MAF_4833 (-106270), c-MAF_241 (-20784)                                                                                                                                                                                                                       |
| <i>KIF2C</i>   | c-MAF_4081 (-17857), c-MAF_6305 (-9067)                                                                                                                                                                                                                        |
| <i>KIF3A</i>   | c-MAF_6588 (+22893)                                                                                                                                                                                                                                            |
| <i>KIF3B</i>   | c-MAF_2665 (-45543), c-MAF_3752 (-25152), c-MAF_1691 (+8268), c-MAF_6387 (+55664)                                                                                                                                                                              |
| <i>KIF5B</i>   | c-MAF_2767 (-94379)                                                                                                                                                                                                                                            |
| <i>KIF5C</i>   | c-MAF_4938 (-98568), c-MAF_3092 (-61356)                                                                                                                                                                                                                       |
| <i>KIN</i>     | c-MAF_6439 (-832)                                                                                                                                                                                                                                              |
| <i>KLFI0</i>   | c-MAF_345 (-155370), c-MAF_5977 (-139703), c-MAF_825 (+5860), c-MAF_832 (+87766), c-MAF_5346 (+98672)                                                                                                                                                          |
| <i>KLFI2</i>   | c-MAF_2608 (-134869), c-MAF_4570 (-120121), c-MAF_3389 (-68100)                                                                                                                                                                                                |
| <i>KLFI4</i>   | c-MAF_4030 (-179379), c-MAF_3396 (-176086), c-MAF_6145 (-131950)                                                                                                                                                                                               |
| <i>KLFI6</i>   | c-MAF_6332 (-18964)                                                                                                                                                                                                                                            |
| <i>KLFI2</i>   | c-MAF_3080 (+5910), c-MAF_3521 (+46873), c-MAF_932 (+124946)                                                                                                                                                                                                   |
| <i>KLFI3</i>   | c-MAF_1379 (-140115), c-MAF_6418 (-103325)                                                                                                                                                                                                                     |
| <i>KLFI4</i>   | c-MAF_251 (+159039), c-MAF_3970 (+180210)                                                                                                                                                                                                                      |
| <i>KLFI5</i>   | c-MAF_5975 (-58447)                                                                                                                                                                                                                                            |
| <i>KLFI6</i>   | c-MAF_5695 (-160741), c-MAF_4145 (-150122), c-MAF_1431 (-117493), c-MAF_3788 (-110350), c-MAF_2749 (-101651), c-MAF_23 (-83911), c-MAF_637 (-67218), c-MAF_2107 (-20147), c-MAF_4775 (+20031), c-MAF_3571 (+27620), c-MAF_2781 (+162569), c-MAF_3609 (+179241) |
| <i>KLFI7</i>   | c-MAF_5719 (-168986), c-MAF_1027 (+1421)                                                                                                                                                                                                                       |
| <i>KLFI9</i>   | c-MAF_1183 (-4986), c-MAF_6050 (+3072)                                                                                                                                                                                                                         |
| <i>KLHDC2</i>  | c-MAF_4861 (+320)                                                                                                                                                                                                                                              |
| <i>KLHDC4</i>  | c-MAF_3636 (-102435)                                                                                                                                                                                                                                           |
| <i>KLHDC8B</i> | c-MAF_4909 (+102668)                                                                                                                                                                                                                                           |
| <i>KLHL10</i>  | c-MAF_2594 (+31522)                                                                                                                                                                                                                                            |
| <i>KLHL15</i>  | c-MAF_5661 (+6982)                                                                                                                                                                                                                                             |
| <i>KLHL22</i>  | c-MAF_5892 (+20971)                                                                                                                                                                                                                                            |
| <i>KLHL25</i>  | c-MAF_154 (+87659), c-MAF_6029 (+105160), c-MAF_841 (+148263), c-MAF_717 (+168967), c-MAF_2662 (+175917)                                                                                                                                                       |
| <i>KLHL36</i>  | c-MAF_6159 (-17340)                                                                                                                                                                                                                                            |
| <i>KLHL38</i>  | c-MAF_984 (-27124), c-MAF_697 (-18164)                                                                                                                                                                                                                         |
| <i>KLHL40</i>  | c-MAF_2558 (-1419)                                                                                                                                                                                                                                             |
| <i>KLHL41</i>  | c-MAF_2772 (-1939)                                                                                                                                                                                                                                             |
| <i>KLHL42</i>  | c-MAF_4398 (+42337)                                                                                                                                                                                                                                            |
| <i>KLHL6</i>   | c-MAF_4370 (-119), c-MAF_6264 (+28371), c-MAF_3950 (+119759)                                                                                                                                                                                                   |
| <i>KLHL7</i>   | c-MAF_1049 (-83380)                                                                                                                                                                                                                                            |
| <i>KLRB1</i>   | c-MAF_2725 (-43051), c-MAF_470 (-7598)                                                                                                                                                                                                                         |
| <i>KLRD1</i>   | c-MAF_6714 (-3521)                                                                                                                                                                                                                                             |
| <i>KLRF1</i>   | c-MAF_5270 (-34061)                                                                                                                                                                                                                                            |
| <i>KLRF2</i>   | c-MAF_3387 (+25537)                                                                                                                                                                                                                                            |
| <i>KLRG1</i>   | c-MAF_3898 (+35637)                                                                                                                                                                                                                                            |
| <i>KMO</i>     | c-MAF_64 (+82265), c-MAF_2619 (+85789)                                                                                                                                                                                                                         |
| <i>KMT2D</i>   | c-MAF_119 (-8769)                                                                                                                                                                                                                                              |
| <i>KMT2E</i>   | c-MAF_477 (-69753), c-MAF_907 (-57152), c-MAF_4844 (-4355)                                                                                                                                                                                                     |
| <i>KNCN</i>    | c-MAF_3348 (-41871)                                                                                                                                                                                                                                            |
| <i>KNTC1</i>   | c-MAF_4558 (+17364)                                                                                                                                                                                                                                            |
| <i>KPNA2</i>   | c-MAF_2943 (+147150)                                                                                                                                                                                                                                           |



|                  |                                                                                                                                                                         |
|------------------|-------------------------------------------------------------------------------------------------------------------------------------------------------------------------|
| <i>KPNBI</i>     | c-MAF_4200 (+926), c-MAF_6360 (+20465)                                                                                                                                  |
| <i>KRAS</i>      | c-MAF_232 (-137677), c-MAF_3152 (-72439)                                                                                                                                |
| <i>KRBA1</i>     | c-MAF_3607 (-92984)                                                                                                                                                     |
| <i>KRBOX4</i>    | c-MAF_2700 (-167563), c-MAF_3917 (-126228)                                                                                                                              |
| <i>KREMEN2</i>   | c-MAF_3720 (-48197)                                                                                                                                                     |
| <i>KRR1</i>      | c-MAF_5136 (-173274), c-MAF_1537 (-147462), c-MAF_1118 (-129726), c-MAF_271 (-124371)                                                                                   |
| <i>KRT17</i>     | c-MAF_5521 (-54653), c-MAF_3882 (-41776), c-MAF_6285 (-23755)                                                                                                           |
| <i>KRT78</i>     | c-MAF_2237 (-22477)                                                                                                                                                     |
| <i>KRT8</i>      | c-MAF_2237 (+54998)                                                                                                                                                     |
| <i>KRTAP19-8</i> | c-MAF_6321 (-94592)                                                                                                                                                     |
| <i>KRTAP5-6</i>  | c-MAF_1068 (+31953)                                                                                                                                                     |
| <i>KRTDAP</i>    | c-MAF_98 (+27611)                                                                                                                                                       |
| <i>KSRI</i>      | c-MAF_5324 (-111315), c-MAF_3757 (+72868)                                                                                                                               |
| <i>L3MBTL3</i>   | c-MAF_4565 (+15719)                                                                                                                                                     |
| <i>LAG3</i>      | c-MAF_2387 (-1250)                                                                                                                                                      |
| <i>LAIR1</i>     | c-MAF_230 (-18545), c-MAF_2824 (-8967)                                                                                                                                  |
| <i>LAMB3</i>     | c-MAF_1083 (-8800)                                                                                                                                                      |
| <i>LAMP2</i>     | c-MAF_1134 (-16439)                                                                                                                                                     |
| <i>LAMP3</i>     | c-MAF_3530 (-54878)                                                                                                                                                     |
| <i>LANCL2</i>    | c-MAF_981 (+169081)                                                                                                                                                     |
| <i>LAPTM5</i>    | c-MAF_4709 (-8325), c-MAF_3360 (+8731), c-MAF_951 (+14055)                                                                                                              |
| <i>LARP4</i>     | c-MAF_2464 (+201)                                                                                                                                                       |
| <i>LARS2</i>     | c-MAF_6669 (+117698)                                                                                                                                                    |
| <i>LASIL</i>     | c-MAF_6036 (-61826)                                                                                                                                                     |
| <i>LASPI</i>     | c-MAF_2613 (-2000), c-MAF_781 (+29162)                                                                                                                                  |
| <i>LAT</i>       | c-MAF_2305 (+5995), c-MAF_1090 (+44557)                                                                                                                                 |
| <i>LATS1</i>     | c-MAF_5854 (-273)                                                                                                                                                       |
| <i>LATS2</i>     | c-MAF_2769 (+44081)                                                                                                                                                     |
| <i>LAX1</i>      | c-MAF_495 (-111801)                                                                                                                                                     |
| <i>LAYN</i>      | c-MAF_2434 (+24636)                                                                                                                                                     |
| <i>LBH</i>       | c-MAF_3815 (+81), c-MAF_3997 (+4651), c-MAF_104 (+21659), c-MAF_5507 (+30415), c-MAF_2507 (+36140), c-MAF_2016 (+117369)                                                |
| <i>LBR</i>       | c-MAF_3671 (-49)                                                                                                                                                        |
| <i>LCK</i>       | c-MAF_1622 (+2561), c-MAF_2847 (+5886), c-MAF_5083 (+15986)                                                                                                             |
| <i>LCLATI</i>    | c-MAF_2507 (-179586), c-MAF_2016 (-98357), c-MAF_4383 (-25035)                                                                                                          |
| <i>LCMT1</i>     | c-MAF_4981 (-63030)                                                                                                                                                     |
| <i>LCORL</i>     | c-MAF_6675 (-54091)                                                                                                                                                     |
| <i>LCPI</i>      | c-MAF_5615 (-129967), c-MAF_3289 (+8941)                                                                                                                                |
| <i>LCP2</i>      | c-MAF_1906 (-33200), c-MAF_4319 (+433), c-MAF_6545 (+19322)                                                                                                             |
| <i>LCT</i>       | c-MAF_4090 (+94554)                                                                                                                                                     |
| <i>LDHAL6B</i>   | c-MAF_1208 (+15396), c-MAF_1494 (+44595), c-MAF_2304 (+49332), c-MAF_4406 (+52839), c-MAF_3170 (+61626), c-MAF_5741 (+67506), c-MAF_4271 (+93691), c-MAF_1475 (+115764) |
| <i>LDHD</i>      | c-MAF_2648 (+7707), c-MAF_3556 (+18179), c-MAF_917 (+41298), c-MAF_3632 (+104522)                                                                                       |
| <i>LDLR</i>      | c-MAF_2497 (+5816)                                                                                                                                                      |
| <i>LDLRAD4</i>   | c-MAF_1616 (+159754)                                                                                                                                                    |
| <i>LENG8</i>     | c-MAF_1557 (+2741)                                                                                                                                                      |

|                 |                                                                                                         |
|-----------------|---------------------------------------------------------------------------------------------------------|
| <i>LENG9</i>    | c-MAF_1557 (+12088)                                                                                     |
| <i>LEP</i>      | c-MAF_6237 (-85665)                                                                                     |
| <i>LEPROTL1</i> | c-MAF_2641 (-4516), c-MAF_2958 (+38479)                                                                 |
| <i>LETM2</i>    | c-MAF_4432 (-1374)                                                                                      |
| <i>LETMD1</i>   | c-MAF_6116 (+28138)                                                                                     |
| <i>LFNG</i>     | c-MAF_5898 (-105626)                                                                                    |
| <i>LGALS12</i>  | c-MAF_6716 (+12399)                                                                                     |
| <i>LGALS3</i>   | c-MAF_4783 (+29657)                                                                                     |
| <i>LGALS8</i>   | c-MAF_4022 (-31748), c-MAF_5125 (-15000), c-MAF_6317 (-10664), c-MAF_1340 (-7073), c-MAF_2514 (+16169)  |
| <i>LGALS9</i>   | c-MAF_3757 (-84920)                                                                                     |
| <i>LGALSL</i>   | c-MAF_5843 (-105292), c-MAF_2278 (+28323)                                                               |
| <i>LGMN</i>     | c-MAF_3826 (-26916), c-MAF_4253 (-21966), c-MAF_659 (-19662), c-MAF_3274 (+18509), c-MAF_5248 (+162391) |
| <i>LHFPL2</i>   | c-MAF_3551 (+74123), c-MAF_6189 (+104180)                                                               |
| <i>LHFPL5</i>   | c-MAF_3366 (+6080)                                                                                      |
| <i>LHX3</i>     | c-MAF_3903 (-25401), c-MAF_5372 (-22405)                                                                |
| <i>LHX4</i>     | c-MAF_6700 (+156607)                                                                                    |
| <i>LIF</i>      | c-MAF_2612 (+56131), c-MAF_519 (+85538), c-MAF_3698 (+142165)                                           |
| <i>LIG3</i>     | c-MAF_4347 (+70983), c-MAF_1677 (+83246), c-MAF_1700 (+100345)                                          |
| <i>LILRA6</i>   | c-MAF_5522 (-5299)                                                                                      |
| <i>LILRB3</i>   | c-MAF_2208 (+12038)                                                                                     |
| <i>LILRB5</i>   | c-MAF_5522 (+9188)                                                                                      |
| <i>LIMA1</i>    | c-MAF_1547 (+62991), c-MAF_2809 (+69327), c-MAF_930 (+94474)                                            |
| <i>LIMD1</i>    | c-MAF_6669 (-88600), c-MAF_4562 (+73329)                                                                |
| <i>LIME1</i>    | c-MAF_1693 (-7874)                                                                                      |
| <i>LIMK1</i>    | c-MAF_6510 (-21634)                                                                                     |
| <i>LIMK2</i>    | c-MAF_3158 (-8318)                                                                                      |
| <i>LIMS1</i>    | c-MAF_1877 (-73852), c-MAF_2670 (-42523), c-MAF_227 (-35865)                                            |
| <i>LIN54</i>    | c-MAF_5333 (-2278)                                                                                      |
| <i>LIN7A</i>    | c-MAF_4124 (+159609), c-MAF_6734 (+163430)                                                              |
| <i>LINGO4</i>   | c-MAF_709 (-21941), c-MAF_6208 (-16337)                                                                 |
| <i>LIPC</i>     | c-MAF_1839 (+63417), c-MAF_6207 (+105509)                                                               |
| <i>LIPT1</i>    | c-MAF_5519 (+14787)                                                                                     |
| <i>LMAN1</i>    | c-MAF_4368 (+1804)                                                                                      |
| <i>LMBR1</i>    | c-MAF_6366 (-375)                                                                                       |
| <i>LMF2</i>     | c-MAF_5287 (-1169)                                                                                      |
| <i>LMNA</i>     | c-MAF_5272 (-17420)                                                                                     |
| <i>LMNB1</i>    | c-MAF_4839 (-116919), c-MAF_4595 (-18464), c-MAF_1414 (+54221)                                          |
| <i>LMO4</i>     | c-MAF_1933 (+5447), c-MAF_90 (+75991), c-MAF_3401 (+107181)                                             |
| <i>LMOD3</i>    | c-MAF_5791 (-182637), c-MAF_2839 (-90106), c-MAF_1165 (-77351)                                          |
| <i>LMX1B</i>    | c-MAF_2066 (-97041), c-MAF_383 (+174249)                                                                |
| <i>LNPEP</i>    | c-MAF_5686 (-830), c-MAF_1849 (+25754)                                                                  |
| <i>LONP1</i>    | c-MAF_5885 (-172)                                                                                       |
| <i>LONP2</i>    | c-MAF_3895 (+71039)                                                                                     |
| <i>LOXLI</i>    | c-MAF_5498 (-4967)                                                                                      |

|                 |                                                                                                         |
|-----------------|---------------------------------------------------------------------------------------------------------|
| <i>LOXL3</i>    | c-MAF_835 (-920)                                                                                        |
| <i>LPAR3</i>    | c-MAF_6383 (-79066)                                                                                     |
| <i>LPAR6</i>    | c-MAF_2686 (-56386)                                                                                     |
| <i>LPCAT1</i>   | c-MAF_5047 (+34504)                                                                                     |
| <i>LPCAT2</i>   | c-MAF_1915 (-8909)                                                                                      |
| <i>LPHN1</i>    | c-MAF_6441 (-147500)                                                                                    |
| <i>LPIN1</i>    | c-MAF_6225 (+10975), c-MAF_3629 (+129725)                                                               |
| <i>LPIN2</i>    | c-MAF_4459 (-58051), c-MAF_4717 (-46687), c-MAF_2280 (-25516), c-MAF_6420 (+30549), c-MAF_1120 (+52811) |
| <i>LPP</i>      | c-MAF_6401 (-58524), c-MAF_5409 (+127000)                                                               |
| <i>LPXN</i>     | c-MAF_2126 (+635)                                                                                       |
| <i>LRBA</i>     | c-MAF_1633 (-16752), c-MAF_1197 (-14543)                                                                |
| <i>LRFN2</i>    | c-MAF_4042 (+147178)                                                                                    |
| <i>LRFN3</i>    | c-MAF_661 (-21688)                                                                                      |
| <i>LRFN4</i>    | c-MAF_710 (+99560)                                                                                      |
| <i>LRIF1</i>    | c-MAF_1734 (+807)                                                                                       |
| <i>LRIG1</i>    | c-MAF_6110 (-390), c-MAF_694 (+27060)                                                                   |
| <i>LRIG2</i>    | c-MAF_5414 (+68864)                                                                                     |
| <i>LRMP</i>     | c-MAF_1333 (-92125)                                                                                     |
| <i>LRP12</i>    | c-MAF_257 (-76656), c-MAF_183 (-34158), c-MAF_4683 (+3106)                                              |
| <i>LRPPRC</i>   | c-MAF_3611 (-124589)                                                                                    |
| <i>LRRC16A</i>  | c-MAF_914 (-140668)                                                                                     |
| <i>LRRC17</i>   | c-MAF_332 (-77803), c-MAF_2159 (-68943)                                                                 |
| <i>LRRC18</i>   | c-MAF_1154 (-166057), c-MAF_412 (-162891)                                                               |
| <i>LRRC32</i>   | c-MAF_5439 (+40350), c-MAF_494 (+103084), c-MAF_1985 (+115715)                                          |
| <i>LRRC37A3</i> | c-MAF_1872 (-129270), c-MAF_2729 (-66467), c-MAF_2926 (-57079), c-MAF_3822 (-50512)                     |
| <i>LRRC4</i>    | c-MAF_6237 (-124549), c-MAF_3716 (+27073), c-MAF_2083 (+174120)                                         |
| <i>LRRC8B</i>   | c-MAF_1048 (-131), c-MAF_1752 (+20929), c-MAF_1087 (+78896)                                             |
| <i>LRRC8C</i>   | c-MAF_1752 (-87240), c-MAF_1087 (-29273), c-MAF_6236 (+86531)                                           |
| <i>LRRC8D</i>   | c-MAF_6236 (-101429)                                                                                    |
| <i>LRRFIP1</i>  | c-MAF_5127 (-17445), c-MAF_545 (+4308)                                                                  |
| <i>LRRK1</i>    | c-MAF_1045 (+105026), c-MAF_3933 (+170595)                                                              |
| <i>LRRN3</i>    | c-MAF_6702 (-63359), c-MAF_601 (-14588), c-MAF_2552 (-4224), c-MAF_6280 (+47295)                        |
| <i>LRRTM2</i>   | c-MAF_2362 (+117613)                                                                                    |
| <i>LRTOMT</i>   | c-MAF_6614 (-39537)                                                                                     |
| <i>LSM4</i>     | c-MAF_3928 (-5176), c-MAF_4858 (+18521), c-MAF_2461 (+28492)                                            |
| <i>LSM6</i>     | c-MAF_4070 (+70347), c-MAF_5714 (+154823)                                                               |
| <i>LSMEM2</i>   | c-MAF_3312 (-32097)                                                                                     |
| <i>LTA</i>      | c-MAF_1589 (-13016), c-MAF_3223 (-4094)                                                                 |
| <i>LTBP1</i>    | c-MAF_5775 (+122981)                                                                                    |
| <i>LTBP4</i>    | c-MAF_6713 (+69295)                                                                                     |
| <i>LTK</i>      | c-MAF_552 (-1821)                                                                                       |
| <i>LTV1</i>     | c-MAF_6463 (-40332), c-MAF_900 (-36916)                                                                 |
| <i>LUC7L</i>    | c-MAF_4248 (+730)                                                                                       |
| <i>LUC7L2</i>   | c-MAF_2964 (-558)                                                                                       |

|                  |                                                                                                                                                                                                                                                                                    |
|------------------|------------------------------------------------------------------------------------------------------------------------------------------------------------------------------------------------------------------------------------------------------------------------------------|
| <i>LUZP1</i>     | c-MAF_5271 (+68654)                                                                                                                                                                                                                                                                |
| <i>LY6E</i>      | c-MAF_3320 (-27654)                                                                                                                                                                                                                                                                |
| <i>LY6H</i>      | c-MAF_6351 (-30648)                                                                                                                                                                                                                                                                |
| <i>LY86</i>      | c-MAF_4515 (-72202)                                                                                                                                                                                                                                                                |
| <i>LY9</i>       | c-MAF_4831 (+50)                                                                                                                                                                                                                                                                   |
| <i>LY96</i>      | c-MAF_301 (+88), c-MAF_5656 (+66162)                                                                                                                                                                                                                                               |
| <i>LYPLA2</i>    | c-MAF_1097 (-10887), c-MAF_361 (-5926)                                                                                                                                                                                                                                             |
| <i>LYRM1</i>     | c-MAF_3077 (-3730), c-MAF_939 (+9928), c-MAF_1629 (+44048)                                                                                                                                                                                                                         |
| <i>LYRM7</i>     | c-MAF_2738 (+82305), c-MAF_1309 (+87412)                                                                                                                                                                                                                                           |
| <i>LYST</i>      | c-MAF_2369 (-132636), c-MAF_4706 (-71860), c-MAF_5357 (-56908), c-MAF_6169 (-21511), c-MAF_6045 (-16658), c-MAF_115 (-6417), c-MAF_6721 (+132390)                                                                                                                                  |
| <i>LYZL2</i>     | c-MAF_158 (-182407), c-MAF_2884 (-107222), c-MAF_1501 (-71948), c-MAF_1047 (-66206), c-MAF_1518 (-52806), c-MAF_2025 (+87044), c-MAF_5146 (+89213)                                                                                                                                 |
| <i>LZTFL1</i>    | c-MAF_5653 (-22703), c-MAF_2832 (-2715)                                                                                                                                                                                                                                            |
| <i>LZTSL</i>     | c-MAF_4903 (+51975)                                                                                                                                                                                                                                                                |
| <i>M6PR</i>      | c-MAF_5280 (-260)                                                                                                                                                                                                                                                                  |
| <i>MACF1</i>     | c-MAF_6374 (+7275), c-MAF_3144 (+71715), c-MAF_3264 (+102471), c-MAF_1243 (+109040), c-MAF_1896 (+122091)                                                                                                                                                                          |
| <i>MAEA</i>      | c-MAF_558 (+11332)                                                                                                                                                                                                                                                                 |
| <i>MAF</i>       | c-MAF_6026 (-113170), c-MAF_687 (-27962), c-MAF_2649 (-17569), c-MAF_1005 (-1842), c-MAF_2466 (+149283)                                                                                                                                                                            |
| <i>MAFA</i>      | c-MAF_3128 (-31551)                                                                                                                                                                                                                                                                |
| <i>MAFF</i>      | c-MAF_2759 (+16835)                                                                                                                                                                                                                                                                |
| <i>MAFG</i>      | c-MAF_1670 (+735), c-MAF_778 (+2670)                                                                                                                                                                                                                                               |
| <i>MAK16</i>     | c-MAF_6605 (+70257)                                                                                                                                                                                                                                                                |
| <i>MAL</i>       | c-MAF_5381 (+49012)                                                                                                                                                                                                                                                                |
| <i>MALSU1</i>    | c-MAF_4616 (+119051)                                                                                                                                                                                                                                                               |
| <i>MALT1</i>     | c-MAF_2859 (+16649)                                                                                                                                                                                                                                                                |
| <i>MAML1</i>     | c-MAF_3926 (-402)                                                                                                                                                                                                                                                                  |
| <i>MAML2</i>     | c-MAF_3721 (+3694), c-MAF_4453 (+75239), c-MAF_5586 (+143377), c-MAF_5564 (+154486), c-MAF_6413 (+174359)                                                                                                                                                                          |
| <i>MAMLD1</i>    | c-MAF_4605 (+115814)                                                                                                                                                                                                                                                               |
| <i>MAN1A1</i>    | c-MAF_4641 (-777), c-MAF_2954 (+33850)                                                                                                                                                                                                                                             |
| <i>MAN1A2</i>    | c-MAF_4077 (+167661)                                                                                                                                                                                                                                                               |
| <i>MAN1C1</i>    | c-MAF_2888 (+87117)                                                                                                                                                                                                                                                                |
| <i>MAN2A1</i>    | c-MAF_5218 (+830)                                                                                                                                                                                                                                                                  |
| <i>MANBA</i>     | c-MAF_2629 (-19584), c-MAF_2653 (+161873)                                                                                                                                                                                                                                          |
| <i>MANEA</i>     | c-MAF_2492 (-793)                                                                                                                                                                                                                                                                  |
| <i>MANSC1</i>    | c-MAF_633 (-150798), c-MAF_6097 (-141524), c-MAF_4379 (-136538), c-MAF_1293 (-131887), c-MAF_225 (-124657), c-MAF_4575 (-120683), c-MAF_74 (-115802), c-MAF_4577 (-111458), c-MAF_815 (-106303), c-MAF_4063 (-94867), c-MAF_950 (-89321), c-MAF_3196 (-49346), c-MAF_1958 (-34205) |
| <i>MAP1LC3B</i>  | c-MAF_5095 (+66051)                                                                                                                                                                                                                                                                |
| <i>MAP1LC3B2</i> | c-MAF_796 (+482), c-MAF_6696 (+113901)                                                                                                                                                                                                                                             |
| <i>MAP1LC3C</i>  | c-MAF_6526 (-18834)                                                                                                                                                                                                                                                                |
| <i>MAP2K2</i>    | c-MAF_5117 (+19077)                                                                                                                                                                                                                                                                |
| <i>MAP2K3</i>    | c-MAF_5425 (+56720), c-MAF_5565 (+59661)                                                                                                                                                                                                                                           |
| <i>MAP2K4</i>    | c-MAF_3311 (+20738)                                                                                                                                                                                                                                                                |
| <i>MAP3K1</i>    | c-MAF_2654 (+2084)                                                                                                                                                                                                                                                                 |
| <i>MAP3K12</i>   | c-MAF_5626 (+14830), c-MAF_4674 (+19548), c-MAF_475 (+39439)                                                                                                                                                                                                                       |
| <i>MAP3K15</i>   | c-MAF_440 (-167567), c-MAF_311 (-110383), c-MAF_6425 (-80071), c-MAF_5980 (-51151), c-MAF_5466 (-                                                                                                                                                                                  |

|                 |                                                                                                            |
|-----------------|------------------------------------------------------------------------------------------------------------|
|                 | 39831)                                                                                                     |
| <i>MAP3K4</i>   | c-MAF_6600 (+46572)                                                                                        |
| <i>MAP3K5</i>   | c-MAF_3768 (+3987), c-MAF_3783 (+30794)                                                                    |
| <i>MAP3K7</i>   | c-MAF_1312 (+113203), c-MAF_1064 (+120370), c-MAF_150 (+128545), c-MAF_184 (+175445), c-MAF_2894 (+180695) |
| <i>MAP3K7CL</i> | c-MAF_676 (+101748), c-MAF_6021 (+115927)                                                                  |
| <i>MAP3K8</i>   | c-MAF_1811 (-15060), c-MAF_3169 (-11507), c-MAF_788 (+3176), c-MAF_5146 (+106612), c-MAF_2025 (+108781)    |
| <i>MAP4K1</i>   | c-MAF_2646 (+58128)                                                                                        |
| <i>MAP4K3</i>   | c-MAF_3054 (-2539), c-MAF_4109 (+46828), c-MAF_5081 (+79940)                                               |
| <i>MAP4K4</i>   | c-MAF_4517 (-45980)                                                                                        |
| <i>MAP7D3</i>   | c-MAF_1458 (-8265)                                                                                         |
| <i>MAPK10</i>   | c-MAF_36 (-184562), c-MAF_5525 (-163457)                                                                   |
| <i>MAPK13</i>   | c-MAF_2559 (-11543)                                                                                        |
| <i>MAPK14</i>   | c-MAF_2559 (+91067)                                                                                        |
| <i>MAPK3</i>    | c-MAF_6018 (-7592)                                                                                         |
| <i>MAPK6</i>    | c-MAF_1523 (+2060)                                                                                         |
| <i>MAPK7</i>    | c-MAF_6758 (-7454)                                                                                         |
| <i>MAPK8</i>    | c-MAF_4855 (+82817)                                                                                        |
| <i>MAPKAPK2</i> | c-MAF_3596 (-4454), c-MAF_3948 (+21690), c-MAF_2513 (+28203), c-MAF_3087 (+52095)                          |
| <i>MAPKAPK5</i> | c-MAF_2443 (+152041)                                                                                       |
| <i>MAPKBPI</i>  | c-MAF_4539 (-112345)                                                                                       |
| <i>MAPRE2</i>   | c-MAF_933 (+2044)                                                                                          |
| <i>MAPT</i>     | c-MAF_3582 (-20413)                                                                                        |
| <i>5-Mar</i>    | c-MAF_5267 (-703), c-MAF_1740 (+12233)                                                                     |
| <i>MARCKSL1</i> | c-MAF_5379 (+14188)                                                                                        |
| <i>MAST2</i>    | c-MAF_3781 (+67969)                                                                                        |
| <i>MAST3</i>    | c-MAF_5575 (-10980), c-MAF_3267 (-8628)                                                                    |
| <i>MAST4</i>    | c-MAF_3041 (-41988)                                                                                        |
| <i>MAT2A</i>    | c-MAF_6132 (-120468)                                                                                       |
| <i>MAT2B</i>    | c-MAF_1158 (-939)                                                                                          |
| <i>MATK</i>     | c-MAF_3674 (-10759), c-MAF_4704 (-5152)                                                                    |
| <i>MATN1</i>    | c-MAF_3360 (-25502), c-MAF_951 (-20178), c-MAF_6352 (+15213)                                               |
| <i>MATN2</i>    | c-MAF_286 (+91365)                                                                                         |
| <i>MAX</i>      | c-MAF_6613 (-138852), c-MAF_3395 (-108610), c-MAF_1440 (-104553)                                           |
| <i>MB21D1</i>   | c-MAF_5153 (+29609)                                                                                        |
| <i>MBD2</i>     | c-MAF_6071 (+23478), c-MAF_3793 (+75618), c-MAF_4482 (+138310)                                             |
| <i>MBD3L4</i>   | c-MAF_3982 (+26149)                                                                                        |
| <i>MBL2</i>     | c-MAF_6589 (+131716)                                                                                       |
| <i>MBNL1</i>    | c-MAF_1292 (+1419), c-MAF_3460 (+42117), c-MAF_5417 (+55904), c-MAF_6223 (+63265)                          |
| <i>MBNL2</i>    | c-MAF_1816 (-120253), c-MAF_4226 (+4799), c-MAF_3456 (+36019), c-MAF_1249 (+68629), c-MAF_4795 (+121117)   |
| <i>MBOAT1</i>   | c-MAF_5273 (+5450), c-MAF_2068 (+10210)                                                                    |
| <i>MBOAT4</i>   | c-MAF_2958 (+10727)                                                                                        |
| <i>MBP</i>      | c-MAF_1774 (+29941), c-MAF_3034 (+67254), c-MAF_2830 (+77511)                                              |
| <i>MCF2L2</i>   | c-MAF_6264 (-99043), c-MAF_3950 (-7655), c-MAF_2295 (+121192), c-MAF_2920 (+142257)                        |
| <i>MCHR1</i>    | c-MAF_500 (+32964), c-MAF_791 (+52996)                                                                     |

|                |                                                                                                                                                                                                |
|----------------|------------------------------------------------------------------------------------------------------------------------------------------------------------------------------------------------|
| <i>MCHR2</i>   | c-MAF_5305 (-177859), c-MAF_3332 (-132802)                                                                                                                                                     |
| <i>MCL1</i>    | c-MAF_5563 (-34213), c-MAF_1279 (-32108), c-MAF_6749 (-17342), c-MAF_1503 (+11958), c-MAF_3291 (+15877)                                                                                        |
| <i>MCM10</i>   | c-MAF_2425 (-53351)                                                                                                                                                                            |
| <i>MCM3</i>    | c-MAF_2279 (+31121)                                                                                                                                                                            |
| <i>MCM6</i>    | c-MAF_2574 (-84641), c-MAF_6626 (+134)                                                                                                                                                         |
| <i>MCM8</i>    | c-MAF_1448 (-3185)                                                                                                                                                                             |
| <i>MCMBP</i>   | c-MAF_210 (-479), c-MAF_1502 (+35641), c-MAF_4092 (+70339)                                                                                                                                     |
| <i>MCOLN2</i>  | c-MAF_6383 (+51715)                                                                                                                                                                            |
| <i>MCOLN3</i>  | c-MAF_6540 (-100347)                                                                                                                                                                           |
| <i>MCTP2</i>   | c-MAF_6179 (-123691), c-MAF_2592 (-91687)                                                                                                                                                      |
| <i>MCTS1</i>   | c-MAF_5203 (+24373)                                                                                                                                                                            |
| <i>MCU</i>     | c-MAF_6385 (-15529)                                                                                                                                                                            |
| <i>MDC1</i>    | c-MAF_809 (-2029), c-MAF_1617 (+213)                                                                                                                                                           |
| <i>MDFI</i>    | c-MAF_5909 (-77717)                                                                                                                                                                            |
| <i>MDFIC</i>   | c-MAF_5576 (-137943), c-MAF_5288 (+2135)                                                                                                                                                       |
| <i>MDGA1</i>   | c-MAF_3385 (+151426), c-MAF_5449 (+180301)                                                                                                                                                     |
| <i>MDM1</i>    | c-MAF_1107 (-165579), c-MAF_67 (-149045), c-MAF_3915 (-143040), c-MAF_4529 (-119519), c-MAF_6134 (-107988), c-MAF_1722 (-33181), c-MAF_1538 (+42031), c-MAF_3840 (+50432), c-MAF_3043 (+64148) |
| <i>MDM2</i>    | c-MAF_6041 (+956)                                                                                                                                                                              |
| <i>MDM4</i>    | c-MAF_5826 (-9572), c-MAF_4729 (+108)                                                                                                                                                          |
| <i>MDN1</i>    | c-MAF_4495 (-15519)                                                                                                                                                                            |
| <i>ME1</i>     | c-MAF_2899 (+159619)                                                                                                                                                                           |
| <i>ME3</i>     | c-MAF_698 (-67991)                                                                                                                                                                             |
| <i>MECP2</i>   | c-MAF_5334 (+38600)                                                                                                                                                                            |
| <i>MED13</i>   | c-MAF_860 (-33502)                                                                                                                                                                             |
| <i>MED13L</i>  | c-MAF_4961 (+177270)                                                                                                                                                                           |
| <i>MED15</i>   | c-MAF_3703 (+44181), c-MAF_866 (+55617), c-MAF_1179 (+61606)                                                                                                                                   |
| <i>MED21</i>   | c-MAF_1271 (+154380), c-MAF_1079 (+157325), c-MAF_1916 (+163227)                                                                                                                               |
| <i>MED26</i>   | c-MAF_6659 (+391)                                                                                                                                                                              |
| <i>MED27</i>   | c-MAF_4212 (-65358), c-MAF_2856 (-46591), c-MAF_5514 (-33), c-MAF_2367 (+4357)                                                                                                                 |
| <i>MED29</i>   | c-MAF_485 (+10370)                                                                                                                                                                             |
| <i>MED7</i>    | c-MAF_5455 (-16297)                                                                                                                                                                            |
| <i>MED9</i>    | c-MAF_5752 (-68311), c-MAF_5447 (-60479), c-MAF_6241 (-58503)                                                                                                                                  |
| <i>MEDAG</i>   | c-MAF_5955 (-165823), c-MAF_2630 (-161643), c-MAF_899 (+139801)                                                                                                                                |
| <i>MEF2A</i>   | c-MAF_3165 (-123276)                                                                                                                                                                           |
| <i>MEFV</i>    | c-MAF_2743 (-7108)                                                                                                                                                                             |
| <i>MEI1</i>    | c-MAF_2730 (+71763)                                                                                                                                                                            |
| <i>MELK</i>    | c-MAF_4254 (-84350)                                                                                                                                                                            |
| <i>MEMO1</i>   | c-MAF_803 (+47400)                                                                                                                                                                             |
| <i>MEPCE</i>   | c-MAF_4274 (-560)                                                                                                                                                                              |
| <i>MERTK</i>   | c-MAF_4510 (+54800)                                                                                                                                                                            |
| <i>MESDC2</i>  | c-MAF_782 (-33908), c-MAF_2281 (-11188)                                                                                                                                                        |
| <i>MESP2</i>   | c-MAF_2094 (+5687)                                                                                                                                                                             |
| <i>METRNL</i>  | c-MAF_2683 (+4258), c-MAF_341 (+110085)                                                                                                                                                        |
| <i>METTL14</i> | c-MAF_4521 (+44619), c-MAF_4405 (+91271)                                                                                                                                                       |

|                    |                                                                                                                                                                                                                                          |
|--------------------|------------------------------------------------------------------------------------------------------------------------------------------------------------------------------------------------------------------------------------------|
| <i>METTL16</i>     | c-MAF_2970 (+104694)                                                                                                                                                                                                                     |
| <i>METTL20</i>     | c-MAF_5920 (+74298), c-MAF_3859 (+87281)                                                                                                                                                                                                 |
| <i>METTL21C</i>    | c-MAF_4660 (-85267), c-MAF_6701 (+13485)                                                                                                                                                                                                 |
| <i>METTL21D</i>    | c-MAF_4785 (+33099), c-MAF_3071 (+53672), c-MAF_3855 (+71245), c-MAF_4061 (+77680), c-MAF_130 (+115689), c-MAF_1024 (+131869), c-MAF_606 (+133857), c-MAF_58 (+143364), c-MAF_6399 (+154854), c-MAF_3968 (+175524), c-MAF_3811 (+181740) |
| <i>METTL23</i>     | c-MAF_4009 (+202)                                                                                                                                                                                                                        |
| <i>METTL6</i>      | c-MAF_5196 (-92844), c-MAF_3393 (-1177)                                                                                                                                                                                                  |
| <i>METTL8</i>      | c-MAF_5721 (+28524)                                                                                                                                                                                                                      |
| <i>MEX3A</i>       | c-MAF_5272 (-15289)                                                                                                                                                                                                                      |
| <i>MEX3C</i>       | c-MAF_5858 (+25767), c-MAF_2476 (+143249)                                                                                                                                                                                                |
| <i>MFAP3</i>       | c-MAF_3885 (+5494), c-MAF_706 (+20805)                                                                                                                                                                                                   |
| <i>MFGE8</i>       | c-MAF_3585 (-154920)                                                                                                                                                                                                                     |
| <i>MFN2</i>        | c-MAF_6178 (+38933), c-MAF_1450 (+67291), c-MAF_1821 (+72005)                                                                                                                                                                            |
| <i>MFNG</i>        | c-MAF_4817 (+53838)                                                                                                                                                                                                                      |
| <i>MFSD1</i>       | c-MAF_1040 (+7911)                                                                                                                                                                                                                       |
| <i>MFSD10</i>      | c-MAF_4264 (-22351), c-MAF_5816 (-20102), c-MAF_5722 (-8226), c-MAF_6051 (-1712)                                                                                                                                                         |
| <i>MFSD6</i>       | c-MAF_1480 (+43598)                                                                                                                                                                                                                      |
| <i>MGA</i>         | c-MAF_4539 (+1767)                                                                                                                                                                                                                       |
| <i>MGARP</i>       | c-MAF_5818 (+13500)                                                                                                                                                                                                                      |
| <i>MGAT1</i>       | c-MAF_2726 (+5421)                                                                                                                                                                                                                       |
| <i>MGAT2</i>       | c-MAF_3106 (-224)                                                                                                                                                                                                                        |
| <i>MGAT4A</i>      | c-MAF_2458 (-40793), c-MAF_4888 (-5525)                                                                                                                                                                                                  |
| <i>MGAT5</i>       | c-MAF_1427 (-1565), c-MAF_2823 (+7675), c-MAF_2605 (+17348), c-MAF_4307 (+77551), c-MAF_1288 (+113256)                                                                                                                                   |
| <i>MGAT5B</i>      | c-MAF_4834 (+125582)                                                                                                                                                                                                                     |
| <i>MGEA5</i>       | c-MAF_2051 (-12838), c-MAF_1881 (+3562)                                                                                                                                                                                                  |
| <i>MGLL</i>        | c-MAF_6520 (-43386)                                                                                                                                                                                                                      |
| <i>MGME1</i>       | c-MAF_3595 (-124968), c-MAF_2664 (-13605), c-MAF_2152 (-9128), c-MAF_1132 (-2975)                                                                                                                                                        |
| <i>MGRN1</i>       | c-MAF_4837 (-95267), c-MAF_5979 (+662), c-MAF_4409 (+35756)                                                                                                                                                                              |
| <i>MIA</i>         | c-MAF_3501 (-18547)                                                                                                                                                                                                                      |
| <i>MIA2</i>        | c-MAF_1794 (-4638)                                                                                                                                                                                                                       |
| <i>MIB1</i>        | c-MAF_4743 (-5626)                                                                                                                                                                                                                       |
| <i>MICAL2</i>      | c-MAF_584 (+64032), c-MAF_3061 (+80079), c-MAF_2333 (+96875), c-MAF_3901 (+113872)                                                                                                                                                       |
| <i>MICALCL</i>     | c-MAF_584 (-112277), c-MAF_3061 (-96230), c-MAF_2333 (-79434), c-MAF_3901 (-62437)                                                                                                                                                       |
| <i>MICU1</i>       | c-MAF_6385 (-50497)                                                                                                                                                                                                                      |
| <i>MICU2</i>       | c-MAF_4620 (+175)                                                                                                                                                                                                                        |
| <i>MICU3</i>       | c-MAF_3602 (-285)                                                                                                                                                                                                                        |
| <i>MIDN</i>        | c-MAF_3411 (-318)                                                                                                                                                                                                                        |
| <i>MINA</i>        | c-MAF_2992 (-65846), c-MAF_5972 (+3872), c-MAF_1055 (+100161)                                                                                                                                                                            |
| <i>MINOS1</i>      | c-MAF_1630 (+10157)                                                                                                                                                                                                                      |
| <i>MINOS1-NBL1</i> | c-MAF_169 (-100966), c-MAF_4114 (-91799)                                                                                                                                                                                                 |
| <i>MIOS</i>        | c-MAF_1273 (+73334), c-MAF_1806 (+114412)                                                                                                                                                                                                |
| <i>MIPEP</i>       | c-MAF_5015 (+89258), c-MAF_4566 (+94645), c-MAF_1272 (+136932)                                                                                                                                                                           |
| <i>MIS18A</i>      | c-MAF_4974 (-152)                                                                                                                                                                                                                        |
| <i>MITD1</i>       | c-MAF_5519 (+11316)                                                                                                                                                                                                                      |

|                |                                                                                                        |
|----------------|--------------------------------------------------------------------------------------------------------|
| <i>MKI67</i>   | c-MAF_4552 (+847), c-MAF_3748 (+61638), c-MAF_4536 (+97026), c-MAF_2808 (+99521), c-MAF_1287 (+135039) |
| <i>MKI67IP</i> | c-MAF_618 (+14247)                                                                                     |
| <i>MKL1</i>    | c-MAF_3989 (+101523)                                                                                   |
| <i>MKL2</i>    | c-MAF_1468 (-122143)                                                                                   |
| <i>MKLN1</i>   | c-MAF_4781 (-138955)                                                                                   |
| <i>MKNK1</i>   | c-MAF_3348 (+11128)                                                                                    |
| <i>MLANA</i>   | c-MAF_3208 (-45850), c-MAF_1928 (-36348), c-MAF_5238 (-32649), c-MAF_1891 (+19531), c-MAF_12 (+30211)  |
| <i>MLEC</i>    | c-MAF_3533 (-2292), c-MAF_2216 (-230)                                                                  |
| <i>MLH1</i>    | c-MAF_3015 (-729)                                                                                      |
| <i>MLLT3</i>   | c-MAF_5964 (-613)                                                                                      |
| <i>MLLT4</i>   | c-MAF_4080 (+4656), c-MAF_896 (+30168)                                                                 |
| <i>MLLT6</i>   | c-MAF_2373 (-28160), c-MAF_701 (-4039)                                                                 |
| <i>MLN</i>     | c-MAF_4281 (-100629), c-MAF_963 (-36184)                                                               |
| <i>MLPH</i>    | c-MAF_2541 (-54028), c-MAF_1708 (-52062), c-MAF_6033 (-45476)                                          |
| <i>MMP13</i>   | c-MAF_6059 (-95504), c-MAF_836 (-80558)                                                                |
| <i>MMP19</i>   | c-MAF_958 (-42483)                                                                                     |
| <i>MMP2</i>    | c-MAF_1915 (+21118)                                                                                    |
| <i>MMP20</i>   | c-MAF_1681 (+25774), c-MAF_669 (+36073), c-MAF_5441 (+60998)                                           |
| <i>MMP7</i>    | c-MAF_1681 (-68805), c-MAF_669 (-58506), c-MAF_5441 (-33581)                                           |
| <i>MMS19</i>   | c-MAF_2223 (-43596)                                                                                    |
| <i>MNDA</i>    | c-MAF_2595 (-11677)                                                                                    |
| <i>MNF1</i>    | c-MAF_4380 (+17033), c-MAF_4147 (+89861)                                                               |
| <i>MNT</i>     | c-MAF_2970 (-6074), c-MAF_6324 (-723)                                                                  |
| <i>MNX1</i>    | c-MAF_4530 (-5872)                                                                                     |
| <i>MOBP</i>    | c-MAF_6530 (+73164)                                                                                    |
| <i>MOCS2</i>   | c-MAF_2752 (+39963), c-MAF_3725 (+68303), c-MAF_77 (+104585)                                           |
| <i>MOCS3</i>   | c-MAF_2468 (+21549)                                                                                    |
| <i>MOGAT1</i>  | c-MAF_3600 (+141829)                                                                                   |
| <i>MOK</i>     | c-MAF_3345 (+120778), c-MAF_3646 (+158260)                                                             |
| <i>MORC1</i>   | c-MAF_5649 (+46150)                                                                                    |
| <i>MORF4L2</i> | c-MAF_5154 (-826)                                                                                      |
| <i>MOSPD2</i>  | c-MAF_3475 (+170267)                                                                                   |
| <i>MOV10L1</i> | c-MAF_3225 (+15889)                                                                                    |
| <i>MPP1</i>    | c-MAF_2044 (-22336), c-MAF_4897 (+1929), c-MAF_237 (+6189)                                             |
| <i>MPP3</i>    | c-MAF_6210 (+48209)                                                                                    |
| <i>MPPE1</i>   | c-MAF_4052 (-38208)                                                                                    |
| <i>MPRIP</i>   | c-MAF_338 (-53930), c-MAF_727 (+77017)                                                                 |
| <i>MPV17L</i>  | c-MAF_5650 (+43934)                                                                                    |
| <i>MPZL1</i>   | c-MAF_5299 (-83846), c-MAF_631 (-79579), c-MAF_2756 (+81454)                                           |
| <i>MPZL3</i>   | c-MAF_5545 (+10766)                                                                                    |
| <i>MRI</i>     | c-MAF_2553 (+100637), c-MAF_5905 (+107538)                                                             |
| <i>MREG</i>    | c-MAF_5976 (+513), c-MAF_3833 (+8448)                                                                  |
| <i>MRM1</i>    | c-MAF_3697 (+120400), c-MAF_6297 (+126641)                                                             |
| <i>MRPL1</i>   | c-MAF_2270 (-7773)                                                                                     |



|                |                                                                                      |
|----------------|--------------------------------------------------------------------------------------|
| <i>MRPL10</i>  | c-MAF_1169 (-404)                                                                    |
| <i>MRPL16</i>  | c-MAF_5889 (+41589)                                                                  |
| <i>MRPL17</i>  | c-MAF_5658 (-63206), c-MAF_2695 (-12069)                                             |
| <i>MRPL23</i>  | c-MAF_1668 (+130230)                                                                 |
| <i>MRPL24</i>  | c-MAF_3496 (-192)                                                                    |
| <i>MRPL3</i>   | c-MAF_1607 (+116252)                                                                 |
| <i>MRPL33</i>  | c-MAF_4828 (-65719), c-MAF_3984 (+38150), c-MAF_4485 (+85591)                        |
| <i>MRPL35</i>  | c-MAF_3098 (-135)                                                                    |
| <i>MRPL36</i>  | c-MAF_1680 (+6887)                                                                   |
| <i>MRPL37</i>  | c-MAF_2689 (+30667)                                                                  |
| <i>MRPL39</i>  | c-MAF_5065 (+30678), c-MAF_1943 (+33519), c-MAF_1053 (+97438), c-MAF_1373 (+147945)  |
| <i>MRPL47</i>  | c-MAF_5896 (-4842)                                                                   |
| <i>MRPL48</i>  | c-MAF_4397 (+82257)                                                                  |
| <i>MRPL53</i>  | c-MAF_5855 (+455)                                                                    |
| <i>MRPS10</i>  | c-MAF_4990 (-74476)                                                                  |
| <i>MRPS18A</i> | c-MAF_2487 (+17566)                                                                  |
| <i>MRPS23</i>  | c-MAF_3971 (-100950)                                                                 |
| <i>MRPS25</i>  | c-MAF_5541 (-32759), c-MAF_3304 (+9981)                                              |
| <i>MRPS28</i>  | c-MAF_6536 (+513)                                                                    |
| <i>MRPS31</i>  | c-MAF_5748 (-5629), c-MAF_5919 (+5902)                                               |
| <i>MRPS5</i>   | c-MAF_5381 (+47304)                                                                  |
| <i>MRPS6</i>   | c-MAF_3827 (-133039), c-MAF_4661 (-125660), c-MAF_1932 (-96491), c-MAF_3744 (-64695) |
| <i>MRV11</i>   | c-MAF_2412 (-49227)                                                                  |
| <i>MSC</i>     | c-MAF_2340 (-156014)                                                                 |
| <i>MSL2</i>    | c-MAF_6242 (+2277), c-MAF_515 (+120422)                                              |
| <i>MSMO1</i>   | c-MAF_1426 (-1672)                                                                   |
| <i>MSN</i>     | c-MAF_6036 (-71075), c-MAF_2892 (-319), c-MAF_4074 (+6998)                           |
| <i>MTA3</i>    | c-MAF_5660 (+50732), c-MAF_5624 (+81087)                                             |
| <i>MTAP</i>    | c-MAF_820 (+728)                                                                     |
| <i>MTCH2</i>   | c-MAF_5375 (-67848)                                                                  |
| <i>MTDH</i>    | c-MAF_5750 (-15837)                                                                  |
| <i>MTERFD3</i> | c-MAF_4234 (-40637)                                                                  |
| <i>MTF1</i>    | c-MAF_4680 (+34000), c-MAF_2981 (+35941)                                             |
| <i>MTF2</i>    | c-MAF_5419 (-36351)                                                                  |
| <i>MTFPI</i>   | c-MAF_1137 (-4837)                                                                   |
| <i>MTG1</i>    | c-MAF_4363 (-4962), c-MAF_3604 (+59512), c-MAF_1853 (+81295)                         |
| <i>MTHFD1</i>  | c-MAF_5814 (+28617), c-MAF_5265 (+50651)                                             |
| <i>MTHFD2</i>  | c-MAF_6070 (+7902)                                                                   |
| <i>MTHFD2L</i> | c-MAF_6773 (+86069)                                                                  |
| <i>MTL5</i>    | c-MAF_3886 (-87748)                                                                  |
| <i>MTM1</i>    | c-MAF_4605 (-89569), c-MAF_5221 (+6438)                                              |
| <i>MTMR1</i>   | c-MAF_5221 (-118376), c-MAF_5048 (+3699)                                             |
| <i>MTMR12</i>  | c-MAF_2502 (+15419)                                                                  |
| <i>MTMR2</i>   | c-MAF_1612 (-151408), c-MAF_4830 (-143892)                                           |
| <i>MTMR6</i>   | c-MAF_662 (-4384)                                                                    |

|                 |                                                                                                                                                                                                  |
|-----------------|--------------------------------------------------------------------------------------------------------------------------------------------------------------------------------------------------|
| <i>MTPAP</i>    | c-MAF_3169 (-73111), c-MAF_1811 (-69558)                                                                                                                                                         |
| <i>MTPN</i>     | c-MAF_3854 (-17283), c-MAF_3934 (+47881)                                                                                                                                                         |
| <i>MTRNR2L8</i> | c-MAF_6487 (+53070)                                                                                                                                                                              |
| <i>MTSS1</i>    | c-MAF_1993 (-29155), c-MAF_6404 (+84216), c-MAF_5692 (+98509), c-MAF_6717 (+123648)                                                                                                              |
| <i>MTUS1</i>    | c-MAF_596 (+103152), c-MAF_2825 (+110466)                                                                                                                                                        |
| <i>MTUS2</i>    | c-MAF_5518 (+138202)                                                                                                                                                                             |
| <i>MTX3</i>     | c-MAF_620 (+896), c-MAF_4628 (+7399)                                                                                                                                                             |
| <i>MUC13</i>    | c-MAF_5132 (-61095)                                                                                                                                                                              |
| <i>MUC21</i>    | c-MAF_839 (-19732)                                                                                                                                                                               |
| <i>MUC22</i>    | c-MAF_5963 (+47985)                                                                                                                                                                              |
| <i>MXD4</i>     | c-MAF_353 (-150894)                                                                                                                                                                              |
| <i>MXI1</i>     | c-MAF_6056 (-129792), c-MAF_2845 (-123469), c-MAF_2043 (-105821), c-MAF_4091 (+625), c-MAF_6645 (+3840), c-MAF_3962 (+14418), c-MAF_5292 (+95371)                                                |
| <i>MXRA7</i>    | c-MAF_4371 (-5482)                                                                                                                                                                               |
| <i>MYB</i>      | c-MAF_2301 (-66715), c-MAF_3327 (+15985), c-MAF_337 (+29794)                                                                                                                                     |
| <i>MYBL1</i>    | c-MAF_504 (-2283), c-MAF_6549 (+64307), c-MAF_175 (+77325)                                                                                                                                       |
| <i>MYBPC3</i>   | c-MAF_6633 (-17043)                                                                                                                                                                              |
| <i>MYC</i>      | c-MAF_2822 (-584), c-MAF_4404 (+180257)                                                                                                                                                          |
| <i>MYCBP2</i>   | c-MAF_2949 (-2664)                                                                                                                                                                               |
| <i>MYD88</i>    | c-MAF_6005 (+15773)                                                                                                                                                                              |
| <i>MYF5</i>     | c-MAF_6734 (+57583), c-MAF_4124 (+61404)                                                                                                                                                         |
| <i>MYH10</i>    | c-MAF_5080 (+174802)                                                                                                                                                                             |
| <i>MYH7B</i>    | c-MAF_3579 (+110300)                                                                                                                                                                             |
| <i>MYH9</i>     | c-MAF_2564 (+4562), c-MAF_3415 (+18544), c-MAF_6570 (+22757), c-MAF_2610 (+30863), c-MAF_3850 (+43333), c-MAF_4162 (+48519)                                                                      |
| <i>MYL12A</i>   | c-MAF_2413 (-1554)                                                                                                                                                                               |
| <i>MYL12B</i>   | c-MAF_3657 (+43124)                                                                                                                                                                              |
| <i>MYL2</i>     | c-MAF_2896 (+140056), c-MAF_2022 (+143844)                                                                                                                                                       |
| <i>MYL4</i>     | c-MAF_2680 (-4156)                                                                                                                                                                               |
| <i>MYL6</i>     | c-MAF_6652 (+11280)                                                                                                                                                                              |
| <i>MYLIP</i>    | c-MAF_6681 (-138747), c-MAF_4809 (-134011)                                                                                                                                                       |
| <i>MYLK3</i>    | c-MAF_3642 (-81467)                                                                                                                                                                              |
| <i>MYO18A</i>   | c-MAF_1890 (+40805)                                                                                                                                                                              |
| <i>MYO18B</i>   | c-MAF_4652 (-32304)                                                                                                                                                                              |
| <i>MYO1D</i>    | c-MAF_3509 (+54544)                                                                                                                                                                              |
| <i>MYO1E</i>    | c-MAF_4097 (-47520), c-MAF_1475 (+50293), c-MAF_4271 (+72366), c-MAF_5741 (+98551), c-MAF_3170 (+104431), c-MAF_4406 (+113218), c-MAF_2304 (+116725), c-MAF_1494 (+121462), c-MAF_1208 (+150661) |
| <i>MYO1F</i>    | c-MAF_1065 (+1813)                                                                                                                                                                               |
| <i>MYO1G</i>    | c-MAF_4064 (-1647)                                                                                                                                                                               |
| <i>MYO1H</i>    | c-MAF_2765 (+110394)                                                                                                                                                                             |
| <i>MYO3B</i>    | c-MAF_4158 (+162871)                                                                                                                                                                             |
| <i>MYO5A</i>    | c-MAF_2947 (+47061), c-MAF_1886 (+64400), c-MAF_3138 (+149320)                                                                                                                                   |
| <i>MYO5C</i>    | c-MAF_1886 (-168852), c-MAF_3138 (-83932), c-MAF_4928 (-35787)                                                                                                                                   |
| <i>MYO7A</i>    | c-MAF_3172 (+24037)                                                                                                                                                                              |
| <i>MYO9A</i>    | c-MAF_5436 (-769)                                                                                                                                                                                |
| <i>MYOC</i>     | c-MAF_3278 (-87322), c-MAF_6311 (+150777)                                                                                                                                                        |
| <i>MYOF</i>     | c-MAF_6630 (-349)                                                                                                                                                                                |

|                |                                                                                                        |
|----------------|--------------------------------------------------------------------------------------------------------|
| <i>MYOM1</i>   | c-MAF_4459 (+150110), c-MAF_4717 (+161474), c-MAF_2280 (+182645)                                       |
| <i>MYOM2</i>   | c-MAF_5023 (+76425)                                                                                    |
| <i>MYRF</i>    | c-MAF_2058 (-56508)                                                                                    |
| <i>MZB1</i>    | c-MAF_850 (-167)                                                                                       |
| <i>MZF1</i>    | c-MAF_2287 (-7705)                                                                                     |
| <i>N4BP1</i>   | c-MAF_1472 (-2946), c-MAF_1868 (+1531), c-MAF_1126 (+51520), c-MAF_5607 (+151648)                      |
| <i>N4BP2L2</i> | c-MAF_3335 (+3594), c-MAF_335 (+66399), c-MAF_2352 (+85497), c-MAF_6198 (+110620)                      |
| <i>N6AMT1</i>  | c-MAF_6457 (+109009)                                                                                   |
| <i>NAA15</i>   | c-MAF_3867 (-218)                                                                                      |
| <i>NAA25</i>   | c-MAF_4557 (+12196), c-MAF_1742 (+24945)                                                               |
| <i>NAA35</i>   | c-MAF_3215 (+24035), c-MAF_4399 (+155488)                                                              |
| <i>NAB1</i>    | c-MAF_1725 (-85937), c-MAF_807 (+506), c-MAF_453 (+73967), c-MAF_1602 (+142392)                        |
| <i>NAB2</i>    | c-MAF_2814 (-1850)                                                                                     |
| <i>NABP1</i>   | c-MAF_3564 (-106993), c-MAF_5513 (-60668), c-MAF_4206 (-2499)                                          |
| <i>NACC1</i>   | c-MAF_2067 (-1478), c-MAF_2020 (+14326)                                                                |
| <i>NACC2</i>   | c-MAF_708 (-59518)                                                                                     |
| <i>NAGLU</i>   | c-MAF_5342 (-11846)                                                                                    |
| <i>NAIF1</i>   | c-MAF_2236 (+36253), c-MAF_770 (+38605)                                                                |
| <i>NAMPT</i>   | c-MAF_2583 (-139996), c-MAF_4437 (-133138), c-MAF_49 (-61666)                                          |
| <i>NAPIL1</i>  | c-MAF_396 (-73846)                                                                                     |
| <i>NAPIL4</i>  | c-MAF_4766 (-57524), c-MAF_833 (-22168), c-MAF_874 (-18825), c-MAF_1850 (+3279)                        |
| <i>NAPB</i>    | c-MAF_4435 (+3661), c-MAF_6400 (+21519)                                                                |
| <i>NARFL</i>   | c-MAF_3635 (+4748)                                                                                     |
| <i>NARG2</i>   | c-MAF_555 (-103436), c-MAF_366 (-92107), c-MAF_4177 (-84185), c-MAF_4738 (-69232), c-MAF_2023 (-47425) |
| <i>NARS2</i>   | c-MAF_3346 (-68419), c-MAF_2880 (+14466), c-MAF_4733 (+121133)                                         |
| <i>NAT10</i>   | c-MAF_980 (+129973), c-MAF_4491 (+138768)                                                              |
| <i>NAT8L</i>   | c-MAF_6083 (+112824)                                                                                   |
| <i>NBEAL2</i>  | c-MAF_2489 (-31357), c-MAF_743 (-20444)                                                                |
| <i>NBL1</i>    | c-MAF_1630 (-36085)                                                                                    |
| <i>NBN</i>     | c-MAF_2951 (+671)                                                                                      |
| <i>NBPF1</i>   | c-MAF_2703 (+99414), c-MAF_4594 (+169186)                                                              |
| <i>NBPF12</i>  | c-MAF_6658 (+182131)                                                                                   |
| <i>NBPF3</i>   | c-MAF_840 (-144444), c-MAF_2225 (-115429)                                                              |
| <i>NBPF9</i>   | c-MAF_4352 (+96622)                                                                                    |
| <i>NCALD</i>   | c-MAF_695 (+18039), c-MAF_4138 (+71432), c-MAF_339 (+112444)                                           |
| <i>NCAPG2</i>  | c-MAF_3290 (+48459)                                                                                    |
| <i>NCAPH</i>   | c-MAF_2201 (+8508), c-MAF_1408 (+24297)                                                                |
| <i>NCAPH2</i>  | c-MAF_5287 (+600)                                                                                      |
| <i>NCEH1</i>   | c-MAF_2887 (+1145), c-MAF_5635 (+118829)                                                               |
| <i>NCF1</i>    | c-MAF_5830 (-112914)                                                                                   |
| <i>NCF4</i>    | c-MAF_609 (+12970), c-MAF_3858 (+23910)                                                                |
| <i>NCK1</i>    | c-MAF_3117 (-23039), c-MAF_2785 (+57771)                                                               |
| <i>NCK2</i>    | c-MAF_2699 (+24494), c-MAF_6528 (+51124), c-MAF_3232 (+64380), c-MAF_946 (+182602)                     |
| <i>NCKAPIL</i> | c-MAF_3662 (-4)                                                                                        |

|                   |                                                                                                                          |
|-------------------|--------------------------------------------------------------------------------------------------------------------------|
| <i>NCLN</i>       | c-MAF_3709 (-228)                                                                                                        |
| <i>NCOA1</i>      | c-MAF_4799 (+87757)                                                                                                      |
| <i>NCOA3</i>      | c-MAF_2286 (-121141), c-MAF_461 (-14496), c-MAF_6000 (-4277), c-MAF_4411 (-15), c-MAF_3535 (+42502), c-MAF_6222 (+73341) |
| <i>NCOA7</i>      | c-MAF_4408 (+8624), c-MAF_625 (+123892), c-MAF_2221 (+134562)                                                            |
| <i>NCOR2</i>      | c-MAF_5698 (-50922), c-MAF_4213 (+1226)                                                                                  |
| <i>NCR3LG1</i>    | c-MAF_6172 (-898), c-MAF_2848 (+17137)                                                                                   |
| <i>NCSI</i>       | c-MAF_426 (-64780), c-MAF_2415 (-43299), c-MAF_3552 (-28682), c-MAF_6076 (+67379)                                        |
| <i>NDC1</i>       | c-MAF_3074 (+55495), c-MAF_4923 (+71764)                                                                                 |
| <i>NDC80</i>      | c-MAF_2909 (+34236), c-MAF_2846 (+73263)                                                                                 |
| <i>NDE1</i>       | c-MAF_4512 (+7756)                                                                                                       |
| <i>NDEL1</i>      | c-MAF_5080 (+20098)                                                                                                      |
| <i>NDFIP1</i>     | c-MAF_4582 (-83542), c-MAF_6499 (-54779), c-MAF_4439 (+913)                                                              |
| <i>NDFIP2</i>     | c-MAF_6517 (-46305), c-MAF_1809 (-29433), c-MAF_5467 (-23069), c-MAF_209 (+845), c-MAF_1490 (+4219)                      |
| <i>NDNF</i>       | c-MAF_6769 (-116929)                                                                                                     |
| <i>NDNL2</i>      | c-MAF_3665 (-716)                                                                                                        |
| <i>NDRG1</i>      | c-MAF_363 (+80121)                                                                                                       |
| <i>NDRG3</i>      | c-MAF_2029 (+12695)                                                                                                      |
| <i>NDRG4</i>      | c-MAF_3285 (+31211)                                                                                                      |
| <i>NDST2</i>      | c-MAF_3616 (-48032)                                                                                                      |
| <i>NDUFA12</i>    | c-MAF_5594 (+62094)                                                                                                      |
| <i>NDUFA6</i>     | c-MAF_1595 (-30089)                                                                                                      |
| <i>NDUFAF6</i>    | c-MAF_3672 (-68772), c-MAF_1780 (-64552), c-MAF_476 (+438)                                                               |
| <i>NDUFAF7</i>    | c-MAF_4261 (-29676)                                                                                                      |
| <i>NDUFB5</i>     | c-MAF_5896 (+4794)                                                                                                       |
| <i>NDUFB9</i>     | c-MAF_6717 (+65678), c-MAF_5692 (+90817), c-MAF_6404 (+105110)                                                           |
| <i>NDUFC1</i>     | c-MAF_3867 (-27)                                                                                                         |
| <i>NDUFS6</i>     | c-MAF_5990 (+34729)                                                                                                      |
| <i>NDUFV2</i>     | c-MAF_6629 (-36370), c-MAF_2275 (-28663), c-MAF_7 (-19725), c-MAF_5688 (-15862), c-MAF_906 (-11306), c-MAF_686 (-7632)   |
| <i>NECAB3</i>     | c-MAF_4808 (+49866)                                                                                                      |
| <i>NECAP1</i>     | c-MAF_4428 (+741)                                                                                                        |
| <i>NECAP2</i>     | c-MAF_4594 (+3565), c-MAF_2703 (+73337)                                                                                  |
| <i>NEDD4</i>      | c-MAF_5418 (+87071)                                                                                                      |
| <i>NEDD8</i>      | c-MAF_862 (-2354)                                                                                                        |
| <i>NEDD8-MDP1</i> | c-MAF_862 (-2456)                                                                                                        |
| <i>NEDD9</i>      | c-MAF_3262 (-121419), c-MAF_4259 (-110254), c-MAF_1125 (-92174), c-MAF_5134 (-85851), c-MAF_2181 (-43192)                |
| <i>NEIL2</i>      | c-MAF_3742 (+13205)                                                                                                      |
| <i>NEIL3</i>      | c-MAF_6533 (+93649)                                                                                                      |
| <i>NEK1</i>       | c-MAF_6741 (+7967)                                                                                                       |
| <i>NEK2</i>       | c-MAF_4431 (+62190)                                                                                                      |
| <i>NEK3</i>       | c-MAF_6518 (-1675)                                                                                                       |
| <i>NEK6</i>       | c-MAF_422 (+28736), c-MAF_2632 (+123684)                                                                                 |
| <i>NEK7</i>       | c-MAF_1170 (-54198), c-MAF_1610 (-12963), c-MAF_6075 (+31411)                                                            |
| <i>NELL2</i>      | c-MAF_3549 (+24454)                                                                                                      |
| <i>NENF</i>       | c-MAF_3753 (+55831), c-MAF_6388 (+134409), c-MAF_3330 (+163404), c-MAF_2318 (+168788)                                    |

|                |                                                                                                                                                                                                                                                                                                     |
|----------------|-----------------------------------------------------------------------------------------------------------------------------------------------------------------------------------------------------------------------------------------------------------------------------------------------------|
| <i>NEU1</i>    | c-MAF_5325 (+32483)                                                                                                                                                                                                                                                                                 |
| <i>NEU4</i>    | c-MAF_243 (+34452)                                                                                                                                                                                                                                                                                  |
| <i>NEURL</i>   | c-MAF_4630 (-3193), c-MAF_1259 (+6847), c-MAF_937 (+10413)                                                                                                                                                                                                                                          |
| <i>NEURL1B</i> | c-MAF_2551 (+80872), c-MAF_1241 (+124157)                                                                                                                                                                                                                                                           |
| <i>NF2</i>     | c-MAF_1751 (+14808)                                                                                                                                                                                                                                                                                 |
| <i>NFAMI</i>   | c-MAF_3696 (-11268)                                                                                                                                                                                                                                                                                 |
| <i>NFATC1</i>  | c-MAF_2249 (-124211), c-MAF_6288 (+103755), c-MAF_4543 (+116608), c-MAF_536 (+123569)                                                                                                                                                                                                               |
| <i>NFATC2</i>  | c-MAF_6325 (-93654), c-MAF_6500 (-80080), c-MAF_1799 (-68104), c-MAF_2704 (+1379), c-MAF_5764 (+7651), c-MAF_2162 (+12960), c-MAF_2578 (+16836), c-MAF_5505 (+42342), c-MAF_1144 (+44653), c-MAF_5572 (+105420), c-MAF_114 (+118214), c-MAF_265 (+128680), c-MAF_37 (+140430), c-MAF_5087 (+157571) |
| <i>NFATC3</i>  | c-MAF_1221 (-10597), c-MAF_1739 (-3751)                                                                                                                                                                                                                                                             |
| <i>NFE2L2</i>  | c-MAF_5616 (+169)                                                                                                                                                                                                                                                                                   |
| <i>NFE2L3</i>  | c-MAF_4455 (+1667)                                                                                                                                                                                                                                                                                  |
| <i>NFIA</i>    | c-MAF_1521 (-4019), c-MAF_3838 (+173475)                                                                                                                                                                                                                                                            |
| <i>NFIC</i>    | c-MAF_1392 (+18379)                                                                                                                                                                                                                                                                                 |
| <i>NFIL3</i>   | c-MAF_3114 (-4285), c-MAF_3738 (-1583), c-MAF_884 (+7439)                                                                                                                                                                                                                                           |
| <i>NFKB1</i>   | c-MAF_1553 (-110545), c-MAF_3039 (-53728), c-MAF_2653 (+97792)                                                                                                                                                                                                                                      |
| <i>NFKB1A</i>  | c-MAF_4997 (-11567), c-MAF_5290 (-229), c-MAF_514 (+39191)                                                                                                                                                                                                                                          |
| <i>NFKBID</i>  | c-MAF_645 (+1603)                                                                                                                                                                                                                                                                                   |
| <i>NFKBIL1</i> | c-MAF_1589 (+11457)                                                                                                                                                                                                                                                                                 |
| <i>NFKBIZ</i>  | c-MAF_579 (-21449), c-MAF_6348 (+41384), c-MAF_4917 (+87259), c-MAF_879 (+101213), c-MAF_4087 (+138607)                                                                                                                                                                                             |
| <i>NFRKB</i>   | c-MAF_2389 (+46312)                                                                                                                                                                                                                                                                                 |
| <i>NFU1</i>    | c-MAF_1887 (-174797), c-MAF_3111 (-69936)                                                                                                                                                                                                                                                           |
| <i>NFX1</i>    | c-MAF_2199 (+135)                                                                                                                                                                                                                                                                                   |
| <i>NFYC</i>    | c-MAF_3455 (+20100)                                                                                                                                                                                                                                                                                 |
| <i>NHLRC1</i>  | c-MAF_3001 (+7071)                                                                                                                                                                                                                                                                                  |
| <i>NHLRC3</i>  | c-MAF_4440 (+57346)                                                                                                                                                                                                                                                                                 |
| <i>NHP2L1</i>  | c-MAF_2196 (+93)                                                                                                                                                                                                                                                                                    |
| <i>NID1</i>    | c-MAF_2369 (+65606), c-MAF_4706 (+126382), c-MAF_5357 (+141334), c-MAF_6169 (+176731), c-MAF_6045 (+181584)                                                                                                                                                                                         |
| <i>NIN</i>     | c-MAF_4107 (+68642)                                                                                                                                                                                                                                                                                 |
| <i>NINJI</i>   | c-MAF_3164 (-294)                                                                                                                                                                                                                                                                                   |
| <i>NINJ2</i>   | c-MAF_5832 (-79967), c-MAF_3364 (-52946), c-MAF_5186 (-50001), c-MAF_351 (+53328)                                                                                                                                                                                                                   |
| <i>NIPA1</i>   | c-MAF_5350 (-6133), c-MAF_5887 (+10337)                                                                                                                                                                                                                                                             |
| <i>NIPA2</i>   | c-MAF_5887 (-41691)                                                                                                                                                                                                                                                                                 |
| <i>NIPAL4</i>  | c-MAF_3354 (-69451), c-MAF_484 (+84734), c-MAF_3398 (+109879)                                                                                                                                                                                                                                       |
| <i>NKG7</i>    | c-MAF_4210 (-222)                                                                                                                                                                                                                                                                                   |
| <i>NKIRAS1</i> | c-MAF_6552 (-517)                                                                                                                                                                                                                                                                                   |
| <i>NKRF</i>    | c-MAF_1252 (-53447), c-MAF_627 (-49464), c-MAF_6283 (-42785)                                                                                                                                                                                                                                        |
| <i>NKTR</i>    | c-MAF_2701 (-9862)                                                                                                                                                                                                                                                                                  |
| <i>NKX2-2</i>  | c-MAF_6411 (-34522)                                                                                                                                                                                                                                                                                 |
| <i>NKX2-6</i>  | c-MAF_4635 (-76903)                                                                                                                                                                                                                                                                                 |
| <i>NKX6-2</i>  | c-MAF_1449 (+119773)                                                                                                                                                                                                                                                                                |
| <i>NKX6-3</i>  | c-MAF_6624 (-175814), c-MAF_1867 (-145132), c-MAF_404 (-140708), c-MAF_3711 (-137525), c-MAF_3247 (-123258), c-MAF_1434 (-75433), c-MAF_1735 (-69009)                                                                                                                                               |
| <i>NLN</i>     | c-MAF_2688 (+52279)                                                                                                                                                                                                                                                                                 |

|                 |                                                                                                        |
|-----------------|--------------------------------------------------------------------------------------------------------|
| <i>NLRCS</i>    | c-MAF_4975 (+11160), c-MAF_5777 (+25209)                                                               |
| <i>NLRP1</i>    | c-MAF_6278 (-28313)                                                                                    |
| <i>NLRP3</i>    | c-MAF_2983 (-27575)                                                                                    |
| <i>NLRP6</i>    | c-MAF_6330 (+2409)                                                                                     |
| <i>NMB</i>      | c-MAF_1280 (-41416)                                                                                    |
| <i>NME6</i>     | c-MAF_2048 (+32679)                                                                                    |
| <i>NME9</i>     | c-MAF_3979 (+32946)                                                                                    |
| <i>NMI</i>      | c-MAF_1973 (+278)                                                                                      |
| <i>NMRAL1</i>   | c-MAF_2631 (-6045)                                                                                     |
| <i>NMRK1</i>    | c-MAF_2862 (+1511), c-MAF_4798 (+60599)                                                                |
| <i>NMT2</i>     | c-MAF_4860 (-20140)                                                                                    |
| <i>NMU</i>      | c-MAF_6161 (+18400)                                                                                    |
| <i>NNMT</i>     | c-MAF_220 (-184368)                                                                                    |
| <i>NOD1</i>     | c-MAF_3177 (+4513), c-MAF_3428 (+10387), c-MAF_377 (+130381)                                           |
| <i>NOD2</i>     | c-MAF_5961 (+1086)                                                                                     |
| <i>NODAL</i>    | c-MAF_5611 (+10993)                                                                                    |
| <i>NOL10</i>    | c-MAF_13 (+35650), c-MAF_797 (+69300), c-MAF_4900 (+145403), c-MAF_4930 (+151320)                      |
| <i>NOL11</i>    | c-MAF_1324 (-66813)                                                                                    |
| <i>NOLC1</i>    | c-MAF_2901 (+37433)                                                                                    |
| <i>NOPI4</i>    | c-MAF_4264 (+6576), c-MAF_5816 (+8825), c-MAF_5722 (+20701)                                            |
| <i>NOS3</i>     | c-MAF_5853 (+17187)                                                                                    |
| <i>NOSIP</i>    | c-MAF_6138 (+26403)                                                                                    |
| <i>NOTCH1</i>   | c-MAF_3779 (+6021), c-MAF_2028 (+11736)                                                                |
| <i>NOTCH2</i>   | c-MAF_4984 (+101553)                                                                                   |
| <i>NOTCH2NL</i> | c-MAF_1492 (+158323), c-MAF_2519 (+172232)                                                             |
| <i>NOX3</i>     | c-MAF_2843 (-68485), c-MAF_5863 (+37477)                                                               |
| <i>NOX5</i>     | c-MAF_4242 (+19809), c-MAF_6567 (+89788)                                                               |
| <i>NPAS1</i>    | c-MAF_4049 (-94851), c-MAF_2420 (-64134), c-MAF_4056 (-60928), c-MAF_6309 (-56590), c-MAF_296 (-28423) |
| <i>NPAS2</i>    | c-MAF_1455 (+104861)                                                                                   |
| <i>NPAT</i>     | c-MAF_2599 (-2818), c-MAF_3432 (+86269)                                                                |
| <i>NPC1</i>     | c-MAF_4538 (+362), c-MAF_117 (+12865)                                                                  |
| <i>NPC2</i>     | c-MAF_5916 (+781)                                                                                      |
| <i>NPDC1</i>    | c-MAF_6421 (+53)                                                                                       |
| <i>NPFF</i>     | c-MAF_3573 (-110927)                                                                                   |
| <i>NPHP4</i>    | c-MAF_5690 (-35870)                                                                                    |
| <i>NPIPBA</i>   | c-MAF_1738 (-83828)                                                                                    |
| <i>NPM3</i>     | c-MAF_1881 (-31443)                                                                                    |
| <i>NPPB</i>     | c-MAF_5367 (-49557)                                                                                    |
| <i>NPTN</i>     | c-MAF_5556 (+48108)                                                                                    |
| <i>NQO2</i>     | c-MAF_2125 (-9790), c-MAF_4125 (+23692)                                                                |
| <i>NR2C2</i>    | c-MAF_3304 (+107625)                                                                                   |
| <i>NR3C1</i>    | c-MAF_2690 (-45549), c-MAF_6541 (-31680)                                                               |
| <i>NR4A2</i>    | c-MAF_1219 (-10824), c-MAF_2650 (-1873)                                                                |
| <i>NR4A3</i>    | c-MAF_1350 (-7237)                                                                                     |

|                 |                                                                                                          |
|-----------------|----------------------------------------------------------------------------------------------------------|
| <i>NRAS</i>     | c-MAF_965 (-28651)                                                                                       |
| <i>NRBF2</i>    | c-MAF_1921 (-29253), c-MAF_4374 (+74045)                                                                 |
| <i>NRDE2</i>    | c-MAF_2136 (-51229), c-MAF_3425 (+56711)                                                                 |
| <i>NREP</i>     | c-MAF_6519 (-183578), c-MAF_4848 (-178659)                                                               |
| <i>NRF1</i>     | c-MAF_3343 (-117404), c-MAF_3409 (-80739)                                                                |
| <i>NRPI</i>     | c-MAF_1338 (-41254), c-MAF_5555 (+72093), c-MAF_2813 (+83345), c-MAF_4286 (+87436), c-MAF_2147 (+155737) |
| <i>NRP2</i>     | c-MAF_1639 (+18335), c-MAF_6087 (+140374)                                                                |
| <i>NRXN2</i>    | c-MAF_3640 (+102296)                                                                                     |
| <i>NSL1</i>     | c-MAF_6150 (-2976), c-MAF_4112 (+70003)                                                                  |
| <i>NSMAF</i>    | c-MAF_764 (-142113), c-MAF_4376 (-83343)                                                                 |
| <i>NSMCE1</i>   | c-MAF_6766 (+22762), c-MAF_5006 (+31056)                                                                 |
| <i>NSMCE2</i>   | c-MAF_593 (+96381)                                                                                       |
| <i>NSUN2</i>    | c-MAF_4065 (+136900)                                                                                     |
| <i>NSUN3</i>    | c-MAF_2031 (+185)                                                                                        |
| <i>NSUN6</i>    | c-MAF_2332 (+165)                                                                                        |
| <i>NT5C1A</i>   | c-MAF_6742 (+5002)                                                                                       |
| <i>NT5C2</i>    | c-MAF_6539 (-70408)                                                                                      |
| <i>NT5DC4</i>   | c-MAF_5429 (-28886)                                                                                      |
| <i>NT5E</i>     | c-MAF_5380 (-88864), c-MAF_3900 (-60563), c-MAF_6124 (-611), c-MAF_1667 (+14242)                         |
| <i>NT5M</i>     | c-MAF_5752 (+105340), c-MAF_5447 (+113172), c-MAF_6241 (+115148)                                         |
| <i>NTAN1</i>    | c-MAF_3191 (+41598)                                                                                      |
| <i>NTMT1</i>    | c-MAF_4988 (-121056), c-MAF_6381 (-37917)                                                                |
| <i>NTNG2</i>    | c-MAF_2856 (-35448), c-MAF_4212 (-16681)                                                                 |
| <i>NTPCR</i>    | c-MAF_954 (+162637)                                                                                      |
| <i>NTRK2</i>    | c-MAF_1004 (+41292), c-MAF_308 (+83610), c-MAF_1829 (+90945)                                             |
| <i>NTSR1</i>    | c-MAF_521 (-56365)                                                                                       |
| <i>NUAK2</i>    | c-MAF_6066 (+83635)                                                                                      |
| <i>NUB1</i>     | c-MAF_3567 (+25827)                                                                                      |
| <i>NUBP1</i>    | c-MAF_28 (+5698)                                                                                         |
| <i>NUCB2</i>    | c-MAF_2239 (-401)                                                                                        |
| <i>NUDT16</i>   | c-MAF_1607 (+4932)                                                                                       |
| <i>NUDT16L1</i> | c-MAF_4409 (-33148)                                                                                      |
| <i>NUDT5</i>    | c-MAF_5493 (-26398), c-MAF_5672 (-6264)                                                                  |
| <i>NUDT7</i>    | c-MAF_4793 (+10110), c-MAF_135 (+14574)                                                                  |
| <i>NUF2</i>     | c-MAF_132 (+59)                                                                                          |
| <i>NUFIP1</i>   | c-MAF_3375 (+54590)                                                                                      |
| <i>NUGGC</i>    | c-MAF_1387 (+4911)                                                                                       |
| <i>NUMB</i>     | c-MAF_4982 (-19223)                                                                                      |
| <i>NUMBL</i>    | c-MAF_4687 (-370), c-MAF_6713 (+24120)                                                                   |
| <i>NUP107</i>   | c-MAF_4178 (-74264), c-MAF_1390 (-12842), c-MAF_2797 (-114)                                              |
| <i>NUP133</i>   | c-MAF_1761 (+67079)                                                                                      |
| <i>NUP153</i>   | c-MAF_5523 (-9014), c-MAF_2155 (+2897), c-MAF_3153 (+32479)                                              |
| <i>NUP160</i>   | c-MAF_1031 (-15130)                                                                                      |
| <i>NUP210L</i>  | c-MAF_4841 (-2760), c-MAF_5165 (+17049)                                                                  |

|                |                                                                                                          |
|----------------|----------------------------------------------------------------------------------------------------------|
| <i>NUP50</i>   | c-MAF_1500 (+6234)                                                                                       |
| <i>NUP62</i>   | c-MAF_2116 (+624)                                                                                        |
| <i>NUP93</i>   | c-MAF_5157 (+41695), c-MAF_6683 (+59509)                                                                 |
| <i>NXPE3</i>   | c-MAF_4283 (-6413), c-MAF_579 (+42665)                                                                   |
| <i>NXPPI</i>   | c-MAF_1488 (-48941)                                                                                      |
| <i>NXT1</i>    | c-MAF_5143 (-171)                                                                                        |
| <i>NYX</i>     | c-MAF_5228 (+70810), c-MAF_2448 (+79591), c-MAF_970 (+109714), c-MAF_1536 (+112238), c-MAF_660 (+113864) |
| <i>OASL</i>    | c-MAF_6639 (-53702)                                                                                      |
| <i>OAT</i>     | c-MAF_5875 (+128298)                                                                                     |
| <i>OAZ2</i>    | c-MAF_6253 (+67720), c-MAF_6777 (+169438)                                                                |
| <i>OBFC1</i>   | c-MAF_5278 (+7172)                                                                                       |
| <i>OCIAD1</i>  | c-MAF_5587 (-38668)                                                                                      |
| <i>OCIAD2</i>  | c-MAF_5703 (-56442)                                                                                      |
| <i>OCSTAMP</i> | c-MAF_2849 (-2588)                                                                                       |
| <i>ODC1</i>    | c-MAF_797 (-172163), c-MAF_4900 (-96060), c-MAF_4930 (-90143), c-MAF_1320 (+116039)                      |
| <i>ODF1</i>    | c-MAF_5938 (-20583), c-MAF_4152 (-15367), c-MAF_5346 (+5658), c-MAF_832 (+16564), c-MAF_825 (+98470)     |
| <i>OGDH</i>    | c-MAF_607 (+24871), c-MAF_2717 (+27111)                                                                  |
| <i>OGT</i>     | c-MAF_2112 (-796), c-MAF_5503 (+3398), c-MAF_176 (+10393)                                                |
| <i>OIP5</i>    | c-MAF_6259 (+51260)                                                                                      |
| <i>OLFML2B</i> | c-MAF_397 (+19896)                                                                                       |
| <i>OLIG1</i>   | c-MAF_5390 (+129960), c-MAF_5318 (+145652)                                                               |
| <i>OLIG3</i>   | c-MAF_1167 (+105075), c-MAF_4356 (+130416)                                                               |
| <i>OOEP</i>    | c-MAF_166 (-19552)                                                                                       |
| <i>OPA1</i>    | c-MAF_4561 (+24680)                                                                                      |
| <i>OPTC</i>    | c-MAF_4866 (+113258)                                                                                     |
| <i>OPTN</i>    | c-MAF_2425 (+8055)                                                                                       |
| <i>OR10D3</i>  | c-MAF_3994 (+90423)                                                                                      |
| <i>OR13A1</i>  | c-MAF_6651 (-37620)                                                                                      |
| <i>OR1K1</i>   | c-MAF_4181 (+7504)                                                                                       |
| <i>OR2A4</i>   | c-MAF_6277 (+61207)                                                                                      |
| <i>OR2AG2</i>  | c-MAF_5658 (+22448), c-MAF_2695 (+73585)                                                                 |
| <i>OR2AK2</i>  | c-MAF_3147 (+42744)                                                                                      |
| <i>OR2AT4</i>  | c-MAF_2359 (-13824), c-MAF_3000 (-10585)                                                                 |
| <i>OR2F2</i>   | c-MAF_3044 (-5449), c-MAF_6603 (-3228)                                                                   |
| <i>OR2L5</i>   | c-MAF_3147 (-13971)                                                                                      |
| <i>OR2V2</i>   | c-MAF_6300 (+34853)                                                                                      |
| <i>OR2Y1</i>   | c-MAF_2726 (-64309), c-MAF_3732 (+21937)                                                                 |
| <i>OR4B1</i>   | c-MAF_2994 (-160802), c-MAF_5434 (-133199), c-MAF_2482 (-122846), c-MAF_610 (-106793)                    |
| <i>OR4F16</i>  | c-MAF_4760 (-92099)                                                                                      |
| <i>OR4N4</i>   | c-MAF_542 (+108870), c-MAF_4341 (+126831)                                                                |
| <i>OR56B1</i>  | c-MAF_3868 (-41564)                                                                                      |
| <i>OR5AC2</i>  | c-MAF_2992 (-48870)                                                                                      |
| <i>OR5AU1</i>  | c-MAF_1977 (-108389), c-MAF_3383 (-93088)                                                                |
| <i>OR6M1</i>   | c-MAF_2269 (+45370)                                                                                      |



|                |                                                                                                                                                                                               |
|----------------|-----------------------------------------------------------------------------------------------------------------------------------------------------------------------------------------------|
| <i>OR6N2</i>   | c-MAF_2595 (-42005)                                                                                                                                                                           |
| <i>OR6X1</i>   | c-MAF_2269 (-6472)                                                                                                                                                                            |
| <i>OR8D1</i>   | c-MAF_3994 (+34387)                                                                                                                                                                           |
| <i>ORAI1</i>   | c-MAF_923 (-35749), c-MAF_4695 (+987)                                                                                                                                                         |
| <i>ORM2</i>    | c-MAF_881 (+36792), c-MAF_4434 (+43312), c-MAF_6568 (+55967)                                                                                                                                  |
| <i>OSBP</i>    | c-MAF_6174 (-78)                                                                                                                                                                              |
| <i>OSBP2</i>   | c-MAF_1600 (+45647)                                                                                                                                                                           |
| <i>OSBPL1A</i> | c-MAF_1214 (-16749)                                                                                                                                                                           |
| <i>OSBPL3</i>  | c-MAF_5005 (-114322), c-MAF_853 (-48547), c-MAF_2408 (+16773), c-MAF_2266 (+58873), c-MAF_5737 (+72547), c-MAF_6182 (+81343), c-MAF_6197 (+96906), c-MAF_1028 (+101966), c-MAF_4673 (+158856) |
| <i>OSBPL8</i>  | c-MAF_6369 (-29303)                                                                                                                                                                           |
| <i>OSGIN2</i>  | c-MAF_3241 (-136498)                                                                                                                                                                          |
| <i>OSTF1</i>   | c-MAF_2862 (-1845), c-MAF_4422 (+29381), c-MAF_3444 (+50755), c-MAF_136 (+60154), c-MAF_4501 (+64088)                                                                                         |
| <i>OSTM1</i>   | c-MAF_6711 (+31736)                                                                                                                                                                           |
| <i>OTOGL</i>   | c-MAF_1313 (-168926), c-MAF_6263 (-164531), c-MAF_1795 (+60678)                                                                                                                               |
| <i>OTUB2</i>   | c-MAF_4269 (-27627), c-MAF_208 (-16317), c-MAF_959 (-4449), c-MAF_4816 (+26165)                                                                                                               |
| <i>OTUD1</i>   | c-MAF_5810 (-107170), c-MAF_2363 (-103854), c-MAF_452 (-70240), c-MAF_1229 (-26788), c-MAF_1950 (+73244), c-MAF_2232 (+75250)                                                                 |
| <i>OTUD4</i>   | c-MAF_5904 (+2735)                                                                                                                                                                            |
| <i>OTUD5</i>   | c-MAF_1323 (+18738), c-MAF_3487 (+20380)                                                                                                                                                      |
| <i>OVOL2</i>   | c-MAF_1213 (+65481)                                                                                                                                                                           |
| <i>OXCT1</i>   | c-MAF_4966 (-20735)                                                                                                                                                                           |
| <i>OXER1</i>   | c-MAF_5624 (+114657), c-MAF_5660 (+145012)                                                                                                                                                    |
| <i>OXGR1</i>   | c-MAF_1816 (-107752)                                                                                                                                                                          |
| <i>OXNAD1</i>  | c-MAF_5946 (-9), c-MAF_429 (+21220)                                                                                                                                                           |
| <i>OXSR1</i>   | c-MAF_6005 (-11254)                                                                                                                                                                           |
| <i>P2RX4</i>   | c-MAF_6719 (-64735), c-MAF_6191 (+895), c-MAF_304 (+5117), c-MAF_3091 (+14810)                                                                                                                |
| <i>P2RX5</i>   | c-MAF_3166 (-14728)                                                                                                                                                                           |
| <i>P2RX7</i>   | c-MAF_6639 (-39884), c-MAF_391 (-3534), c-MAF_6719 (+12502)                                                                                                                                   |
| <i>P2RY10</i>  | c-MAF_6563 (+150780)                                                                                                                                                                          |
| <i>P2RY11</i>  | c-MAF_4503 (+1054)                                                                                                                                                                            |
| <i>P2RY14</i>  | c-MAF_3058 (-26996), c-MAF_3037 (-23473), c-MAF_729 (-5781)                                                                                                                                   |
| <i>P4HA2</i>   | c-MAF_1720 (+116638), c-MAF_2134 (+128496), c-MAF_1352 (+144371)                                                                                                                              |
| <i>P4HA3</i>   | c-MAF_4003 (+121669)                                                                                                                                                                          |
| <i>P4HTM</i>   | c-MAF_3804 (-63029), c-MAF_1367 (-44054)                                                                                                                                                      |
| <i>PAAF1</i>   | c-MAF_4397 (-7396)                                                                                                                                                                            |
| <i>PABPC1</i>  | c-MAF_586 (+3363)                                                                                                                                                                             |
| <i>PAG1</i>    | c-MAF_1057 (+50639)                                                                                                                                                                           |
| <i>PAICS</i>   | c-MAF_1875 (+1754)                                                                                                                                                                            |
| <i>PAK2</i>    | c-MAF_3049 (-12424)                                                                                                                                                                           |
| <i>PAK3</i>    | c-MAF_4250 (-2507), c-MAF_502 (+1640)                                                                                                                                                         |
| <i>PAK4</i>    | c-MAF_3465 (-31779)                                                                                                                                                                           |
| <i>PALD1</i>   | c-MAF_6429 (+99770)                                                                                                                                                                           |
| <i>PALLD</i>   | c-MAF_3589 (+72386), c-MAF_3486 (+137389)                                                                                                                                                     |
| <i>PAM</i>     | c-MAF_5638 (-103133)                                                                                                                                                                          |
| <i>PANX2</i>   | c-MAF_3225 (-64836)                                                                                                                                                                           |

|                 |                                                                                                     |
|-----------------|-----------------------------------------------------------------------------------------------------|
| <i>PAPD4</i>    | c-MAF_2105 (+265)                                                                                   |
| <i>PAPOLA</i>   | c-MAF_3180 (-5177)                                                                                  |
| <i>PAPOLG</i>   | c-MAF_3812 (+63376)                                                                                 |
| <i>PAPSSI</i>   | c-MAF_1643 (+10360), c-MAF_6085 (+19939)                                                            |
| <i>PAQR8</i>    | c-MAF_4573 (+28321)                                                                                 |
| <i>PARD6B</i>   | c-MAF_818 (-184457), c-MAF_658 (-169809)                                                            |
| <i>PARD6G</i>   | c-MAF_2478 (+53559), c-MAF_6123 (+89740)                                                            |
| <i>PARK7</i>    | c-MAF_329 (-12436), c-MAF_3280 (-7640), c-MAF_6644 (-432)                                           |
| <i>PARN</i>     | c-MAF_4913 (-145), c-MAF_2494 (+126888)                                                             |
| <i>PARP1</i>    | c-MAF_2501 (+446)                                                                                   |
| <i>PARP11</i>   | c-MAF_565 (-184326), c-MAF_6582 (-103311)                                                           |
| <i>PARP12</i>   | c-MAF_4494 (+3987), c-MAF_4603 (+82811), c-MAF_4941 (+147437)                                       |
| <i>PARP2</i>    | c-MAF_2069 (+57563)                                                                                 |
| <i>PARP4</i>    | c-MAF_1618 (+1526)                                                                                  |
| <i>PARP8</i>    | c-MAF_5732 (+33107)                                                                                 |
| <i>PARP9</i>    | c-MAF_5085 (+102)                                                                                   |
| <i>PARS2</i>    | c-MAF_1851 (-37025)                                                                                 |
| <i>PATL1</i>    | c-MAF_6354 (-453)                                                                                   |
| <i>PAX1</i>     | c-MAF_6411 (-157111)                                                                                |
| <i>PAX5</i>     | c-MAF_2151 (+105087)                                                                                |
| <i>PAX8</i>     | c-MAF_4378 (+37839)                                                                                 |
| <i>PAXBPI</i>   | c-MAF_2288 (-678)                                                                                   |
| <i>PBX4</i>     | c-MAF_38 (+20870), c-MAF_5454 (+24358), c-MAF_134 (+28968)                                          |
| <i>PBXIP1</i>   | c-MAF_2596 (+13457)                                                                                 |
| <i>PC</i>       | c-MAF_710 (+1314)                                                                                   |
| <i>PCBP1</i>    | c-MAF_4221 (-57455), c-MAF_642 (-43837), c-MAF_679 (-633), c-MAF_1673 (+45440), c-MAF_2803 (+55006) |
| <i>PCBP2</i>    | c-MAF_475 (+2298), c-MAF_4674 (+22189), c-MAF_5626 (+26907)                                         |
| <i>PCBP3</i>    | c-MAF_5301 (-88803), c-MAF_1147 (-51187), c-MAF_5998 (-28259), c-MAF_2655 (+124724)                 |
| <i>PCDH1</i>    | c-MAF_4849 (+28358)                                                                                 |
| <i>PCDHGA1</i>  | c-MAF_6608 (-4325)                                                                                  |
| <i>PCID2</i>    | c-MAF_1016 (+2972)                                                                                  |
| <i>PCMI</i>     | c-MAF_5706 (+18603)                                                                                 |
| <i>PCNP</i>     | c-MAF_352 (-185)                                                                                    |
| <i>PCNXL2</i>   | c-MAF_954 (+182452)                                                                                 |
| <i>PCOLCE2</i>  | c-MAF_3856 (+2106)                                                                                  |
| <i>PCSK1</i>    | c-MAF_4053 (-104331)                                                                                |
| <i>PCSK7</i>    | c-MAF_3680 (+2086)                                                                                  |
| <i>PCSK9</i>    | c-MAF_3040 (+125644), c-MAF_4507 (+149590)                                                          |
| <i>PCYOX1L</i>  | c-MAF_562 (-9324), c-MAF_1 (-420)                                                                   |
| <i>PCYT1A</i>   | c-MAF_1941 (+8153), c-MAF_2987 (+19310)                                                             |
| <i>PCYT1B</i>   | c-MAF_1417 (+167045)                                                                                |
| <i>PDCD1</i>    | c-MAF_2247 (-4928), c-MAF_1430 (-919), c-MAF_243 (+14513)                                           |
| <i>PDCD10</i>   | c-MAF_2539 (+28826)                                                                                 |
| <i>PDCD1LG2</i> | c-MAF_1193 (-16729)                                                                                 |
| <i>PDCD4</i>    | c-MAF_3527 (-138044), c-MAF_2938 (-14056)                                                           |

|                |                                                                                                                                                                      |
|----------------|----------------------------------------------------------------------------------------------------------------------------------------------------------------------|
| <i>PDCD6IP</i> | c-MAF_2728 (+57292)                                                                                                                                                  |
| <i>PDCL</i>    | c-MAF_4181 (+21036)                                                                                                                                                  |
| <i>PDCL3</i>   | c-MAF_1454 (+25687)                                                                                                                                                  |
| <i>PDE10A</i>  | c-MAF_5765 (-104524)                                                                                                                                                 |
| <i>PDE2A</i>   | c-MAF_5184 (+180300)                                                                                                                                                 |
| <i>PDE4A</i>   | c-MAF_1270 (-11889)                                                                                                                                                  |
| <i>PDE4B</i>   | c-MAF_482 (+19689), c-MAF_1575 (+38111), c-MAF_2060 (+74090)                                                                                                         |
| <i>PDE4D</i>   | c-MAF_3256 (+103165)                                                                                                                                                 |
| <i>PDE4DIP</i> | c-MAF_4352 (+86652)                                                                                                                                                  |
| <i>PDE6H</i>   | c-MAF_6109 (+115365)                                                                                                                                                 |
| <i>PDE7A</i>   | c-MAF_2681 (-132010), c-MAF_4631 (-113909)                                                                                                                           |
| <i>PDE7B</i>   | c-MAF_6260 (-128782)                                                                                                                                                 |
| <i>PDE9A</i>   | c-MAF_1660 (-125688)                                                                                                                                                 |
| <i>PDGFA</i>   | c-MAF_3315 (-85206)                                                                                                                                                  |
| <i>PDGFB</i>   | c-MAF_2585 (-73427)                                                                                                                                                  |
| <i>PDGFR1</i>  | c-MAF_2825 (+113769), c-MAF_596 (+121083)                                                                                                                            |
| <i>PDHB</i>    | c-MAF_798 (-37609), c-MAF_5947 (+46636)                                                                                                                              |
| <i>PDHX</i>    | c-MAF_5630 (+90477), c-MAF_1086 (+113535), c-MAF_4272 (+123837), c-MAF_868 (+161464)                                                                                 |
| <i>PDK3</i>    | c-MAF_4127 (-52358), c-MAF_1417 (+14735)                                                                                                                             |
| <i>PDK4</i>    | c-MAF_5474 (-13224)                                                                                                                                                  |
| <i>PDLIM5</i>  | c-MAF_3959 (+90084)                                                                                                                                                  |
| <i>PDP1</i>    | c-MAF_1544 (+154965)                                                                                                                                                 |
| <i>PDP2</i>    | c-MAF_1418 (-6930), c-MAF_4649 (-2182)                                                                                                                               |
| <i>PDPK1</i>   | c-MAF_5786 (+125901)                                                                                                                                                 |
| <i>PDSS1</i>   | c-MAF_6442 (+24025), c-MAF_186 (+41813), c-MAF_3952 (+48641)                                                                                                         |
| <i>PDXDC1</i>  | c-MAF_3191 (+39363)                                                                                                                                                  |
| <i>PDXK</i>    | c-MAF_3141 (-225), c-MAF_5784 (+9415)                                                                                                                                |
| <i>PDZD2</i>   | c-MAF_5093 (-64444)                                                                                                                                                  |
| <i>PEBP1</i>   | c-MAF_608 (+171266)                                                                                                                                                  |
| <i>PEL11</i>   | c-MAF_3729 (-116490), c-MAF_439 (-70222), c-MAF_4045 (-59895), c-MAF_2195 (+1552), c-MAF_1291 (+9385), c-MAF_2307 (+15254), c-MAF_4956 (+30222), c-MAF_802 (+107990) |
| <i>PELO</i>    | c-MAF_5553 (+12349)                                                                                                                                                  |
| <i>PELP1</i>   | c-MAF_6186 (+7624), c-MAF_5783 (+25423), c-MAF_6353 (+45468)                                                                                                         |
| <i>PER1</i>    | c-MAF_3185 (+1090), c-MAF_4549 (+13194)                                                                                                                              |
| <i>PERP</i>    | c-MAF_2934 (+131891), c-MAF_920 (+136995), c-MAF_6469 (+179452)                                                                                                      |
| <i>PET112</i>  | c-MAF_4062 (+93896)                                                                                                                                                  |
| <i>PEX11G</i>  | c-MAF_5567 (-3351), c-MAF_4744 (+8058)                                                                                                                               |
| <i>PEX13</i>   | c-MAF_6196 (-248)                                                                                                                                                    |
| <i>PEX14</i>   | c-MAF_1420 (+36315)                                                                                                                                                  |
| <i>PEX2</i>    | c-MAF_762 (-14025)                                                                                                                                                   |
| <i>PEX3</i>    | c-MAF_4998 (-3568)                                                                                                                                                   |
| <i>PEX5L</i>   | c-MAF_4236 (+69148)                                                                                                                                                  |
| <i>PEX6</i>    | c-MAF_6770 (-222)                                                                                                                                                    |
| <i>PFDNI</i>   | c-MAF_3025 (+51386)                                                                                                                                                  |
| <i>PFKFB3</i>  | c-MAF_3746 (-72670), c-MAF_2076 (-15462), c-MAF_2377 (-1118), c-MAF_6266 (+4888), c-MAF_1541 (+64449), c-MAF_2627 (+67515), c-MAF_921 (+72542), c-MAF_1703 (+88943)  |

|                 |                                                                                                                                                                                                  |
|-----------------|--------------------------------------------------------------------------------------------------------------------------------------------------------------------------------------------------|
| <i>PFKP</i>     | c-MAF_3112 (+28166)                                                                                                                                                                              |
| <i>PFNI</i>     | c-MAF_619 (+173)                                                                                                                                                                                 |
| <i>PFN3</i>     | c-MAF_2072 (+11146)                                                                                                                                                                              |
| <i>PGA5</i>     | c-MAF_5363 (+29498)                                                                                                                                                                              |
| <i>PGAM1</i>    | c-MAF_468 (-12991), c-MAF_2560 (-3064)                                                                                                                                                           |
| <i>PGAM2</i>    | c-MAF_5138 (+18847)                                                                                                                                                                              |
| <i>PGAP1</i>    | c-MAF_1378 (-61517), c-MAF_772 (-1013)                                                                                                                                                           |
| <i>PGBD5</i>    | c-MAF_4554 (+49619)                                                                                                                                                                              |
| <i>PGD</i>      | c-MAF_1659 (-147176), c-MAF_2930 (-145195), c-MAF_6424 (-521)                                                                                                                                    |
| <i>PGGT1B</i>   | c-MAF_5751 (+53446)                                                                                                                                                                              |
| <i>PGK1</i>     | c-MAF_3299 (+2227)                                                                                                                                                                               |
| <i>PGMI</i>     | c-MAF_6108 (-28837)                                                                                                                                                                              |
| <i>PGM3</i>     | c-MAF_2899 (-77538)                                                                                                                                                                              |
| <i>PGPEP1</i>   | c-MAF_3928 (-12137)                                                                                                                                                                              |
| <i>PGPEP1L</i>  | c-MAF_167 (+153238)                                                                                                                                                                              |
| <i>PGSI</i>     | c-MAF_207 (+2996), c-MAF_2186 (+7854)                                                                                                                                                            |
| <i>PHACTR2</i>  | c-MAF_2526 (-131717), c-MAF_5793 (-128041), c-MAF_2005 (-122753), c-MAF_3066 (-110775), c-MAF_6778 (-70629), c-MAF_1255 (-48594), c-MAF_6170 (-30516), c-MAF_6463 (+125047), c-MAF_900 (+128463) |
| <i>PHAX</i>     | c-MAF_4839 (+59961), c-MAF_4595 (+158416)                                                                                                                                                        |
| <i>PHB</i>      | c-MAF_5526 (+24864)                                                                                                                                                                              |
| <i>PHB2</i>     | c-MAF_6593 (+16960)                                                                                                                                                                              |
| <i>PHEX</i>     | c-MAF_5634 (-42872), c-MAF_4921 (+28323)                                                                                                                                                         |
| <i>PHF11</i>    | c-MAF_5256 (+2436)                                                                                                                                                                               |
| <i>PHF15</i>    | c-MAF_3605 (-88949), c-MAF_4220 (-15117), c-MAF_3930 (-1218), c-MAF_1658 (+100459)                                                                                                               |
| <i>PHF19</i>    | c-MAF_994 (-47802), c-MAF_3760 (-15599), c-MAF_3189 (+4296)                                                                                                                                      |
| <i>PHF2</i>     | c-MAF_6258 (-109081)                                                                                                                                                                             |
| <i>PHF20</i>    | c-MAF_773 (+182953)                                                                                                                                                                              |
| <i>PHF20L1</i>  | c-MAF_5839 (+24204)                                                                                                                                                                              |
| <i>PHF21A</i>   | c-MAF_5431 (-2086), c-MAF_2786 (+1351)                                                                                                                                                           |
| <i>PHF3</i>     | c-MAF_4418 (+69966)                                                                                                                                                                              |
| <i>PHF6</i>     | c-MAF_2927 (+1815)                                                                                                                                                                               |
| <i>PHIP</i>     | c-MAF_5591 (-214)                                                                                                                                                                                |
| <i>PHLDA1</i>   | c-MAF_1572 (+12881), c-MAF_663 (+55777), c-MAF_333 (+79595), c-MAF_302 (+89340), c-MAF_1885 (+99326)                                                                                             |
| <i>PHLDA2</i>   | c-MAF_1850 (-59643), c-MAF_4214 (-690)                                                                                                                                                           |
| <i>PHLDB2</i>   | c-MAF_1807 (+104436)                                                                                                                                                                             |
| <i>PHOSPHO1</i> | c-MAF_4237 (-130621), c-MAF_2109 (-112821), c-MAF_4189 (+12603)                                                                                                                                  |
| <i>PHRF1</i>    | c-MAF_4489 (+11611)                                                                                                                                                                              |
| <i>PHTF2</i>    | c-MAF_202 (-8276), c-MAF_4170 (-5429), c-MAF_4309 (+142948)                                                                                                                                      |
| <i>PHYKPL</i>   | c-MAF_6489 (+27168)                                                                                                                                                                              |
| <i>PII6</i>     | c-MAF_4699 (-41623)                                                                                                                                                                              |
| <i>PIBF1</i>    | c-MAF_1779 (+82442)                                                                                                                                                                              |
| <i>PICALM</i>   | c-MAF_2978 (-159932), c-MAF_6234 (-146011), c-MAF_1412 (+120869)                                                                                                                                 |
| <i>PIEZO1</i>   | c-MAF_703 (+3985)                                                                                                                                                                                |
| <i>PIGB</i>     | c-MAF_1672 (-39068), c-MAF_6212 (-36448)                                                                                                                                                         |
| <i>PIGL</i>     | c-MAF_2323 (+70589)                                                                                                                                                                              |

|                |                                                                                                         |
|----------------|---------------------------------------------------------------------------------------------------------|
| <i>PIGN</i>    | c-MAF_5956 (-94774)                                                                                     |
| <i>PIGO</i>    | c-MAF_6040 (+11389)                                                                                     |
| <i>PIGV</i>    | c-MAF_3190 (-85630), c-MAF_252 (-43531), c-MAF_1094 (+2403), c-MAF_1066 (+23722)                        |
| <i>PIGX</i>    | c-MAF_3049 (+15022)                                                                                     |
| <i>PIK3C2A</i> | c-MAF_2089 (+8022), c-MAF_1662 (+23715)                                                                 |
| <i>PIK3C2B</i> | c-MAF_5826 (-16387)                                                                                     |
| <i>PIK3C2G</i> | c-MAF_3446 (-95797)                                                                                     |
| <i>PIK3C3</i>  | c-MAF_6431 (+93188)                                                                                     |
| <i>PIK3CA</i>  | c-MAF_5000 (+32621)                                                                                     |
| <i>PIK3CD</i>  | c-MAF_5365 (-24469), c-MAF_3388 (-21996), c-MAF_1423 (+67376)                                           |
| <i>PIK3CG</i>  | c-MAF_6663 (-147062), c-MAF_736 (-92701)                                                                |
| <i>PIK3R1</i>  | c-MAF_6686 (+24136), c-MAF_168 (+72542), c-MAF_1801 (+128897), c-MAF_3691 (+165497)                     |
| <i>PIK3R4</i>  | c-MAF_639 (-12020)                                                                                      |
| <i>PIK3R5</i>  | c-MAF_4302 (+24073), c-MAF_6218 (+49317)                                                                |
| <i>PIK3R6</i>  | c-MAF_4302 (-73957), c-MAF_6218 (-48713)                                                                |
| <i>PIKFYVE</i> | c-MAF_3355 (-198)                                                                                       |
| <i>PIM1</i>    | c-MAF_1697 (-119886), c-MAF_919 (+13230)                                                                |
| <i>PIM2</i>    | c-MAF_1323 (-19854), c-MAF_3487 (-18212)                                                                |
| <i>PIM3</i>    | c-MAF_6323 (-24258), c-MAF_3695 (+60805)                                                                |
| <i>PIN4</i>    | c-MAF_2472 (-59990)                                                                                     |
| <i>PINX1</i>   | c-MAF_3685 (-175366)                                                                                    |
| <i>PIP4K2A</i> | c-MAF_693 (+32066), c-MAF_5836 (+58872), c-MAF_215 (+83945), c-MAF_795 (+109129)                        |
| <i>PIP5K1B</i> | c-MAF_6206 (-54073), c-MAF_4268 (-52365)                                                                |
| <i>PIP5K1C</i> | c-MAF_4541 (+28565)                                                                                     |
| <i>PIP5K1I</i> | c-MAF_2567 (+1614)                                                                                      |
| <i>PISD</i>    | c-MAF_4239 (-118120), c-MAF_5578 (-32848), c-MAF_1256 (-18514)                                          |
| <i>PITPNB</i>  | c-MAF_4000 (+232)                                                                                       |
| <i>PITPNC1</i> | c-MAF_4202 (+53571), c-MAF_1865 (+57161)                                                                |
| <i>PITRMI</i>  | c-MAF_5261 (-157995), c-MAF_5066 (-25092), c-MAF_3112 (+77125)                                          |
| <i>PITX3</i>   | c-MAF_4859 (-4226)                                                                                      |
| <i>PJA2</i>    | c-MAF_883 (+704)                                                                                        |
| <i>PKD2</i>    | c-MAF_3149 (+1115)                                                                                      |
| <i>PKD2L2</i>  | c-MAF_1296 (+105733), c-MAF_5802 (+108444)                                                              |
| <i>PKDCC</i>   | c-MAF_3235 (-151340), c-MAF_1485 (+54298), c-MAF_911 (+76251), c-MAF_1546 (+85185), c-MAF_3288 (+93936) |
| <i>PKHD1</i>   | c-MAF_924 (-93321), c-MAF_4369 (-70090), c-MAF_3945 (-65185)                                            |
| <i>PKIA</i>    | c-MAF_1655 (+9882)                                                                                      |
| <i>PKIG</i>    | c-MAF_1311 (+21615)                                                                                     |
| <i>PLA1A</i>   | c-MAF_4367 (-15438), c-MAF_6433 (+3302), c-MAF_647 (+32835), c-MAF_139 (+41318)                         |
| <i>PLA2G2D</i> | c-MAF_4617 (+16496)                                                                                     |
| <i>PLA2G5</i>  | c-MAF_4617 (+32853)                                                                                     |
| <i>PLA2G6</i>  | c-MAF_198 (+1567)                                                                                       |
| <i>PLAC1</i>   | c-MAF_2995 (-60728), c-MAF_3866 (+32947), c-MAF_589 (+36047)                                            |
| <i>PLAC8</i>   | c-MAF_1508 (-103197)                                                                                    |
| <i>PLAGL2</i>  | c-MAF_2836 (+3530)                                                                                      |

|                   |                                                                                                                                                                       |
|-------------------|-----------------------------------------------------------------------------------------------------------------------------------------------------------------------|
| <i>PLAT</i>       | c-MAF_1342 (-58529), c-MAF_843 (+30305), c-MAF_5729 (+34694)                                                                                                          |
| <i>PLAU</i>       | c-MAF_2626 (-24791)                                                                                                                                                   |
| <i>PLAUR</i>      | c-MAF_6583 (+6051)                                                                                                                                                    |
| <i>PLB1</i>       | c-MAF_6152 (-89193), c-MAF_585 (-85531), c-MAF_5491 (-70946), c-MAF_2993 (-50620), c-MAF_910 (-30374), c-MAF_5415 (+71280), c-MAF_3231 (+88238), c-MAF_2904 (+117316) |
| <i>PLBD1</i>      | c-MAF_6274 (+156974), c-MAF_4256 (+182990)                                                                                                                            |
| <i>PLCB2</i>      | c-MAF_1624 (-20953)                                                                                                                                                   |
| <i>PLCG1</i>      | c-MAF_2144 (-89086)                                                                                                                                                   |
| <i>PLCG2</i>      | c-MAF_2953 (-183366), c-MAF_4691 (-146230), c-MAF_3819 (-20775)                                                                                                       |
| <i>PLCL2</i>      | c-MAF_3514 (+4187)                                                                                                                                                    |
| <i>PLCXD2</i>     | c-MAF_2852 (-58384), c-MAF_1812 (-507)                                                                                                                                |
| <i>PLD1</i>       | c-MAF_6685 (-17582), c-MAF_849 (-3722), c-MAF_3414 (+13172)                                                                                                           |
| <i>PLD6</i>       | c-MAF_727 (+86538)                                                                                                                                                    |
| <i>PLEC</i>       | c-MAF_6738 (-1642), c-MAF_5091 (+14228)                                                                                                                               |
| <i>PLEK</i>       | c-MAF_6759 (+6572), c-MAF_2106 (+58867), c-MAF_6202 (+76488)                                                                                                          |
| <i>PLEK2</i>      | c-MAF_4075 (+38617)                                                                                                                                                   |
| <i>PLEKHA1</i>    | c-MAF_5427 (-73344)                                                                                                                                                   |
| <i>PLEKHA2</i>    | c-MAF_2108 (-93280), c-MAF_4386 (+2539), c-MAF_4792 (+37436)                                                                                                          |
| <i>PLEKHA3</i>    | c-MAF_926 (+34437)                                                                                                                                                    |
| <i>PLEKHA7</i>    | c-MAF_2245 (+112168)                                                                                                                                                  |
| <i>PLEKHA8</i>    | c-MAF_5020 (+59167)                                                                                                                                                   |
| <i>PLEKHF1</i>    | c-MAF_2838 (+6561), c-MAF_1075 (+22670), c-MAF_483 (+26044)                                                                                                           |
| <i>PLEKHG2</i>    | c-MAF_3875 (-291), c-MAF_1187 (+18367)                                                                                                                                |
| <i>PLEKHG3</i>    | c-MAF_6625 (+22482)                                                                                                                                                   |
| <i>PLEKHG6</i>    | c-MAF_2445 (+26462)                                                                                                                                                   |
| <i>PLEKHG7</i>    | c-MAF_4591 (-184488), c-MAF_3713 (-179419), c-MAF_2416 (-142589), c-MAF_1326 (-138510)                                                                                |
| <i>PLEKHH2</i>    | c-MAF_2817 (-77202)                                                                                                                                                   |
| <i>PLEKHH3</i>    | c-MAF_1035 (-1259)                                                                                                                                                    |
| <i>PLEKHM3</i>    | c-MAF_4525 (+18515)                                                                                                                                                   |
| <i>PLEKHO1</i>    | c-MAF_6042 (-39621), c-MAF_3539 (+37148), c-MAF_5939 (+84869)                                                                                                         |
| <i>PLGRKT</i>     | c-MAF_3499 (+562)                                                                                                                                                     |
| <i>PLIN2</i>      | c-MAF_4677 (-34277), c-MAF_6689 (-2478)                                                                                                                               |
| <i>PLK3</i>       | c-MAF_6622 (-156)                                                                                                                                                     |
| <i>PLN</i>        | c-MAF_3336 (+10825)                                                                                                                                                   |
| <i>PLSCR1</i>     | c-MAF_6640 (-1711)                                                                                                                                                    |
| <i>PLSCR3</i>     | c-MAF_2277 (+9245)                                                                                                                                                    |
| <i>PLXDC1</i>     | c-MAF_6653 (+70662)                                                                                                                                                   |
| <i>PLXNA1</i>     | c-MAF_1833 (-76900)                                                                                                                                                   |
| <i>PLXNA4</i>     | c-MAF_6055 (-78122), c-MAF_5402 (+145810)                                                                                                                             |
| <i>PLXNC1</i>     | c-MAF_2820 (-164650), c-MAF_4155 (+23582), c-MAF_1022 (+157063)                                                                                                       |
| <i>PLXND1</i>     | c-MAF_1798 (+29887)                                                                                                                                                   |
| <i>PM20D1</i>     | c-MAF_4678 (-212)                                                                                                                                                     |
| <i>PMAIP1</i>     | c-MAF_4599 (-14086), c-MAF_5659 (+207), c-MAF_1856 (+50557), c-MAF_5574 (+53324)                                                                                      |
| <i>PMF1-BGLAP</i> | c-MAF_2828 (+10089)                                                                                                                                                   |
| <i>PMM1</i>       | c-MAF_3904 (-14197)                                                                                                                                                   |

|                     |                                                                                      |
|---------------------|--------------------------------------------------------------------------------------|
| <i>PMM2</i>         | c-MAF_6641 (+19458)                                                                  |
| <i>PMP2</i>         | c-MAF_3324 (+96444), c-MAF_961 (+156169), c-MAF_2869 (+160583), c-MAF_3314 (+163711) |
| <i>PMVK</i>         | c-MAF_2596 (-5656)                                                                   |
| <i>PNKD</i>         | c-MAF_1805 (+13936)                                                                  |
| <i>PNMA2</i>        | c-MAF_4978 (-58007)                                                                  |
| <i>PNOC</i>         | c-MAF_4244 (-124351), c-MAF_3893 (-32525), c-MAF_5275 (+31307)                       |
| <i>PNPLA1</i>       | c-MAF_2229 (+113199)                                                                 |
| <i>PNPLA8</i>       | c-MAF_4937 (-29)                                                                     |
| <i>POC1A</i>        | c-MAF_2637 (-20606)                                                                  |
| <i>POC1B-GALNT4</i> | c-MAF_3090 (-71788)                                                                  |
| <i>POC5</i>         | c-MAF_1407 (+174), c-MAF_4136 (+9366), c-MAF_4559 (+47950)                           |
| <i>POFUT1</i>       | c-MAF_2836 (-3619), c-MAF_2665 (+24241), c-MAF_3752 (+44632)                         |
| <i>POFUT2</i>       | c-MAF_4436 (-76337), c-MAF_4671 (+177856)                                            |
| <i>POGK</i>         | c-MAF_3676 (+8321)                                                                   |
| <i>POLB</i>         | c-MAF_4187 (-45419), c-MAF_5053 (-37968), c-MAF_6185 (-638)                          |
| <i>POLE3</i>        | c-MAF_6635 (+167)                                                                    |
| <i>POLG</i>         | c-MAF_6093 (-24033), c-MAF_5981 (+32)                                                |
| <i>POLK</i>         | c-MAF_6491 (-15418)                                                                  |
| <i>POLN</i>         | c-MAF_6083 (+69785)                                                                  |
| <i>POLR1A</i>       | c-MAF_2679 (+112080)                                                                 |
| <i>POLR1E</i>       | c-MAF_1951 (+43311), c-MAF_2623 (+46115), c-MAF_1687 (+63785)                        |
| <i>POLR2A</i>       | c-MAF_3302 (+85)                                                                     |
| <i>POLR3E</i>       | c-MAF_2258 (-56174), c-MAF_775 (+1000)                                               |
| <i>POLRMT</i>       | c-MAF_4323 (+21934)                                                                  |
| <i>POMP</i>         | c-MAF_3724 (-134790), c-MAF_3199 (-119284), c-MAF_6307 (+48949)                      |
| <i>POMT1</i>        | c-MAF_5850 (-51221), c-MAF_1285 (-2323)                                              |
| <i>POP4</i>         | c-MAF_6699 (-16233)                                                                  |
| <i>POP5</i>         | c-MAF_1663 (+41909)                                                                  |
| <i>POPDC2</i>       | c-MAF_139 (+21430), c-MAF_647 (+29913), c-MAF_6433 (+59446)                          |
| <i>POR</i>          | c-MAF_1874 (+93280)                                                                  |
| <i>POU2AF1</i>      | c-MAF_4878 (-34368), c-MAF_234 (+2963), c-MAF_2268 (+8173), c-MAF_2194 (+20393)      |
| <i>POU2F1</i>       | c-MAF_5537 (-12413)                                                                  |
| <i>POU2F2</i>       | c-MAF_5640 (-80657), c-MAF_5345 (-67038), c-MAF_3277 (-52995)                        |
| <i>POU2F3</i>       | c-MAF_4355 (-49594), c-MAF_4666 (+7947)                                              |
| <i>POU3F1</i>       | c-MAF_6432 (+16592), c-MAF_3839 (+18546)                                             |
| <i>POU5F1</i>       | c-MAF_6205 (-33360), c-MAF_5233 (-27497)                                             |
| <i>PPA2</i>         | c-MAF_118 (+167759)                                                                  |
| <i>PPAN</i>         | c-MAF_4285 (-1489)                                                                   |
| <i>PPAN-P2RY11</i>  | c-MAF_4285 (-1516)                                                                   |
| <i>PPAP2A</i>       | c-MAF_4636 (-115563), c-MAF_201 (-55683), c-MAF_998 (-30071), c-MAF_1266 (+94526)    |
| <i>PPARD</i>        | c-MAF_4587 (-39718), c-MAF_2161 (-29643), c-MAF_4659 (+59745)                        |
| <i>PPARG</i>        | c-MAF_2308 (-163804), c-MAF_54 (-157763), c-MAF_5631 (-6242)                         |
| <i>PPARGC1B</i>     | c-MAF_6470 (-45944)                                                                  |
| <i>PPAT</i>         | c-MAF_1875 (-2277)                                                                   |

|                 |                                                                                                                            |
|-----------------|----------------------------------------------------------------------------------------------------------------------------|
| <i>PPEF2</i>    | c-MAF_5662 (+54280)                                                                                                        |
| <i>PPF1A1</i>   | c-MAF_3210 (+94744)                                                                                                        |
| <i>PPFIBP1</i>  | c-MAF_2096 (+143472)                                                                                                       |
| <i>PPFIBP2</i>  | c-MAF_4754 (+64255)                                                                                                        |
| <i>PPIF</i>     | c-MAF_925 (-60869)                                                                                                         |
| <i>PPIL1</i>    | c-MAF_2315 (+12540)                                                                                                        |
| <i>PPIL4</i>    | c-MAF_478 (+37268), c-MAF_1512 (+45762)                                                                                    |
| <i>PPIP5K2</i>  | c-MAF_1902 (-2577), c-MAF_5220 (+87639)                                                                                    |
| <i>PPM1B</i>    | c-MAF_3611 (-48283), c-MAF_4360 (+169), c-MAF_1476 (+15468)                                                                |
| <i>PPM1L</i>    | c-MAF_5102 (+45294)                                                                                                        |
| <i>PPM1M</i>    | c-MAF_431 (+7316), c-MAF_5794 (+25458)                                                                                     |
| <i>PPME1</i>    | c-MAF_4003 (+18889)                                                                                                        |
| <i>PPP1CB</i>   | c-MAF_5415 (-184501), c-MAF_3231 (-167543), c-MAF_2904 (-138465), c-MAF_2334 (-531)                                        |
| <i>PPP1CC</i>   | c-MAF_2896 (-37581), c-MAF_2022 (-33793)                                                                                   |
| <i>PPP1R12A</i> | c-MAF_6263 (-109724), c-MAF_1313 (-105329)                                                                                 |
| <i>PPP1R14C</i> | c-MAF_2540 (+26766)                                                                                                        |
| <i>PPP1R16B</i> | c-MAF_2282 (+43929), c-MAF_274 (+67543), c-MAF_4973 (+88121)                                                               |
| <i>PPP1R26</i>  | c-MAF_6566 (-25082), c-MAF_325 (-10711)                                                                                    |
| <i>PPP1R32</i>  | c-MAF_982 (-34808)                                                                                                         |
| <i>PPP1R3B</i>  | c-MAF_5213 (-2073), c-MAF_886 (+61807), c-MAF_1522 (+68486), c-MAF_3620 (+138579)                                          |
| <i>PPP1R3E</i>  | c-MAF_4624 (+1051)                                                                                                         |
| <i>PPP1R3F</i>  | c-MAF_6445 (-4941), c-MAF_4461 (+3614)                                                                                     |
| <i>PPP1R9B</i>  | c-MAF_5971 (-1367)                                                                                                         |
| <i>PPP2R1B</i>  | c-MAF_6537 (-34874), c-MAF_3249 (+93344)                                                                                   |
| <i>PPP2R2A</i>  | c-MAF_3008 (-27)                                                                                                           |
| <i>PPP2R3A</i>  | c-MAF_515 (+109751)                                                                                                        |
| <i>PPP2R5A</i>  | c-MAF_1011 (-163613), c-MAF_5463 (+17587)                                                                                  |
| <i>PPP2R5C</i>  | c-MAF_2395 (-39602), c-MAF_6468 (+114887)                                                                                  |
| <i>PPP2R5E</i>  | c-MAF_2827 (+75005)                                                                                                        |
| <i>PPP3CA</i>   | c-MAF_5861 (-52804), c-MAF_670 (+115153), c-MAF_6209 (+177789)                                                             |
| <i>PPP3CC</i>   | c-MAF_5684 (+2714)                                                                                                         |
| <i>PPP4R1L</i>  | c-MAF_5959 (+2432)                                                                                                         |
| <i>PPP4R2</i>   | c-MAF_2300 (-19467), c-MAF_1897 (+3276)                                                                                    |
| <i>PPP5C</i>    | c-MAF_5550 (+3243)                                                                                                         |
| <i>PPP5D1</i>   | c-MAF_3862 (-1997), c-MAF_6122 (+78122)                                                                                    |
| <i>PPP6R1</i>   | c-MAF_1290 (-17666), c-MAF_4685 (+4855), c-MAF_5407 (+7258)                                                                |
| <i>PPP6R2</i>   | c-MAF_6609 (+126680)                                                                                                       |
| <i>PPP6R3</i>   | c-MAF_1562 (+11372), c-MAF_4104 (+82164)                                                                                   |
| <i>PPRC1</i>    | c-MAF_2390 (-376)                                                                                                          |
| <i>PQLC1</i>    | c-MAF_6560 (-11731)                                                                                                        |
| <i>PQLC2</i>    | c-MAF_728 (+86251), c-MAF_5254 (+136351), c-MAF_6730 (+165565)                                                             |
| <i>PRDM1</i>    | c-MAF_349 (-103071), c-MAF_5315 (-1635), c-MAF_170 (+11496), c-MAF_4154 (+28371), c-MAF_2080 (+31499), c-MAF_1436 (+77713) |
| <i>PRDM11</i>   | c-MAF_2657 (-63678), c-MAF_5996 (-53861)                                                                                   |
| <i>PRDM14</i>   | c-MAF_2374 (-65667), c-MAF_285 (-59342), c-MAF_774 (+124985), c-MAF_5289 (+128673)                                         |



|                |                                                                                                                                                                                          |
|----------------|------------------------------------------------------------------------------------------------------------------------------------------------------------------------------------------|
| <i>PRDM4</i>   | c-MAF_1141 (+1524)                                                                                                                                                                       |
| <i>PRDM8</i>   | c-MAF_3167 (-42766), c-MAF_330 (-30859), c-MAF_1699 (-11682)                                                                                                                             |
| <i>PRDX2</i>   | c-MAF_2819 (+8145)                                                                                                                                                                       |
| <i>PRDX5</i>   | c-MAF_2257 (-632), c-MAF_5528 (+13792), c-MAF_4762 (+21511)                                                                                                                              |
| <i>PRDX6</i>   | c-MAF_4345 (-597)                                                                                                                                                                        |
| <i>PREP</i>    | c-MAF_3528 (-90374), c-MAF_1772 (-80500), c-MAF_3808 (-55515)                                                                                                                            |
| <i>PREX1</i>   | c-MAF_365 (+5724), c-MAF_4768 (+58141), c-MAF_808 (+67203)                                                                                                                               |
| <i>PRF1</i>    | c-MAF_6429 (+24184)                                                                                                                                                                      |
| <i>PRIMA1</i>  | c-MAF_2127 (-171237), c-MAF_3851 (+139749)                                                                                                                                               |
| <i>PRKAB1</i>  | c-MAF_4044 (+6033)                                                                                                                                                                       |
| <i>PRKAB2</i>  | c-MAF_6658 (+87936)                                                                                                                                                                      |
| <i>PRKACG</i>  | c-MAF_6371 (+39570), c-MAF_5068 (+66038)                                                                                                                                                 |
| <i>PRKAG2</i>  | c-MAF_3018 (+81531)                                                                                                                                                                      |
| <i>PRKARIA</i> | c-MAF_4089 (-46253)                                                                                                                                                                      |
| <i>PRKAR1B</i> | c-MAF_3315 (+108607)                                                                                                                                                                     |
| <i>PRKAR2A</i> | c-MAF_3590 (-49339), c-MAF_5918 (+35435)                                                                                                                                                 |
| <i>PRKCA</i>   | c-MAF_4970 (+11424), c-MAF_6382 (+50393), c-MAF_5443 (+71841)                                                                                                                            |
| <i>PRKCDBP</i> | c-MAF_1073 (-1441)                                                                                                                                                                       |
| <i>PRKCE</i>   | c-MAF_5067 (+30039)                                                                                                                                                                      |
| <i>PRKCH</i>   | c-MAF_3782 (+6828), c-MAF_5118 (+63782), c-MAF_3333 (+81796), c-MAF_3992 (+122654), c-MAF_1542 (+150720)                                                                                 |
| <i>PRKCCQ</i>  | c-MAF_2940 (-63928), c-MAF_469 (-35759), c-MAF_2635 (-32187), c-MAF_2381 (-3417), c-MAF_3136 (+1533), c-MAF_2874 (+21847), c-MAF_245 (+36777), c-MAF_6147 (+49745), c-MAF_5255 (+170076) |
| <i>PRK CZ</i>  | c-MAF_4372 (+83760)                                                                                                                                                                      |
| <i>PRKDC</i>   | c-MAF_1101 (+7937), c-MAF_4262 (+14684)                                                                                                                                                  |
| <i>PRKRA</i>   | c-MAF_4800 (+46718)                                                                                                                                                                      |
| <i>PRKRIR</i>  | c-MAF_1826 (+43268)                                                                                                                                                                      |
| <i>PRKX</i>    | c-MAF_3894 (-30474), c-MAF_3408 (-25098)                                                                                                                                                 |
| <i>PRND</i>    | c-MAF_6673 (-32482)                                                                                                                                                                      |
| <i>PRNP</i>    | c-MAF_6673 (+3192)                                                                                                                                                                       |
| <i>PRNT</i>    | c-MAF_5773 (-54381)                                                                                                                                                                      |
| <i>PROK2</i>   | c-MAF_6423 (-89708)                                                                                                                                                                      |
| <i>PROKR1</i>  | c-MAF_1471 (+73879), c-MAF_1682 (+83650)                                                                                                                                                 |
| <i>PRPF19</i>  | c-MAF_4634 (+139)                                                                                                                                                                        |
| <i>PRPF38B</i> | c-MAF_2157 (+11297)                                                                                                                                                                      |
| <i>PRPF39</i>  | c-MAF_1898 (+5895)                                                                                                                                                                       |
| <i>PRPF4B</i>  | c-MAF_4423 (-2456), c-MAF_4336 (+38066)                                                                                                                                                  |
| <i>PRPF8</i>   | c-MAF_6662 (+11551)                                                                                                                                                                      |
| <i>PRPH</i>    | c-MAF_2049 (-24952)                                                                                                                                                                      |
| <i>PRPSAPI</i> | c-MAF_785 (-18221)                                                                                                                                                                       |
| <i>PRR24</i>   | c-MAF_6344 (-18372), c-MAF_5484 (-1456)                                                                                                                                                  |
| <i>PRR3</i>    | c-MAF_1650 (-40162), c-MAF_2788 (-28690), c-MAF_3792 (+586)                                                                                                                              |
| <i>PRR5L</i>   | c-MAF_1695 (-15533), c-MAF_39 (+1667), c-MAF_6057 (+19094), c-MAF_446 (+45274)                                                                                                           |
| <i>PRR7</i>    | c-MAF_5844 (-14345)                                                                                                                                                                      |
| <i>PRRC2B</i>  | c-MAF_5850 (+21614)                                                                                                                                                                      |
| <i>PRRC2C</i>  | c-MAF_6311 (+16339)                                                                                                                                                                      |

|                |                                                                                                                             |
|----------------|-----------------------------------------------------------------------------------------------------------------------------|
| <i>PRRG4</i>   | c-MAF_2432 (+62425), c-MAF_3035 (+132214)                                                                                   |
| <i>PRSS1</i>   | c-MAF_1275 (+49887)                                                                                                         |
| <i>PRSS23</i>  | c-MAF_698 (-59613), c-MAF_5199 (+5827)                                                                                      |
| <i>PRSS38</i>  | c-MAF_5529 (-27863)                                                                                                         |
| <i>PRSS55</i>  | c-MAF_4546 (-14140)                                                                                                         |
| <i>PRSS58</i>  | c-MAF_4936 (-79727), c-MAF_5219 (+79910)                                                                                    |
| <i>PRTFDC1</i> | c-MAF_2800 (+31064)                                                                                                         |
| <i>PRTG</i>    | c-MAF_5418 (-87081)                                                                                                         |
| <i>PSD4</i>    | c-MAF_4378 (+67140)                                                                                                         |
| <i>PSEN2</i>   | c-MAF_2534 (-106456), c-MAF_5044 (-72004)                                                                                   |
| <i>PSG3</i>    | c-MAF_4618 (+111829)                                                                                                        |
| <i>PSMA1</i>   | c-MAF_4047 (+98785)                                                                                                         |
| <i>PSMA3</i>   | c-MAF_5921 (-5642)                                                                                                          |
| <i>PSMA6</i>   | c-MAF_4131 (-4741), c-MAF_514 (+73198)                                                                                      |
| <i>PSMB1</i>   | c-MAF_6444 (-166)                                                                                                           |
| <i>PSMB7</i>   | c-MAF_2632 (+33792), c-MAF_422 (+128740)                                                                                    |
| <i>PSMB9</i>   | c-MAF_6535 (-264)                                                                                                           |
| <i>PSMC1</i>   | c-MAF_3425 (+18931)                                                                                                         |
| <i>PSMC2</i>   | c-MAF_3673 (-76), c-MAF_1135 (+2901), c-MAF_4731 (+39789)                                                                   |
| <i>PSMC4</i>   | c-MAF_3207 (-28938)                                                                                                         |
| <i>PSMC5</i>   | c-MAF_681 (+415)                                                                                                            |
| <i>PSMD1</i>   | c-MAF_3381 (+33)                                                                                                            |
| <i>PSMD12</i>  | c-MAF_1341 (+108615)                                                                                                        |
| <i>PSMD13</i>  | c-MAF_5169 (-253)                                                                                                           |
| <i>PSMD3</i>   | c-MAF_6708 (+121)                                                                                                           |
| <i>PSMD5</i>   | c-MAF_3189 (-30048), c-MAF_1121 (-1804), c-MAF_4478 (+3729)                                                                 |
| <i>PSMD6</i>   | c-MAF_1888 (+55221)                                                                                                         |
| <i>PSME4</i>   | c-MAF_4245 (-83485), c-MAF_6167 (-70624), c-MAF_3053 (+85709)                                                               |
| <i>PSMF1</i>   | c-MAF_2870 (+31847)                                                                                                         |
| <i>PSPH</i>    | c-MAF_2132 (+51208)                                                                                                         |
| <i>PSTPIP1</i> | c-MAF_5007 (+8111)                                                                                                          |
| <i>PTAFR</i>   | c-MAF_4038 (-22865)                                                                                                         |
| <i>PTBP3</i>   | c-MAF_6390 (+113643), c-MAF_2906 (+152396)                                                                                  |
| <i>PTCHI</i>   | c-MAF_5096 (+46052)                                                                                                         |
| <i>PTDSS1</i>  | c-MAF_4960 (+11854), c-MAF_6047 (+22095)                                                                                    |
| <i>PTDSS2</i>  | c-MAF_6632 (+98)                                                                                                            |
| <i>PTF1A</i>   | c-MAF_5810 (+139772), c-MAF_2363 (+143088), c-MAF_452 (+176702)                                                             |
| <i>PTGDR</i>   | c-MAF_4992 (+40501)                                                                                                         |
| <i>PTGER2</i>  | c-MAF_4992 (-6181), c-MAF_6094 (+10955), c-MAF_5077 (+38003), c-MAF_2400 (+143651)                                          |
| <i>PTGER4</i>  | c-MAF_6579 (-3708)                                                                                                          |
| <i>PTGES3</i>  | c-MAF_1878 (+4110)                                                                                                          |
| <i>PTGFRN</i>  | c-MAF_1718 (-110653), c-MAF_1613 (-106051), c-MAF_2816 (-94930)                                                             |
| <i>PTGIS</i>   | c-MAF_1481 (-131164), c-MAF_40 (-108892), c-MAF_2663 (-101853), c-MAF_4443 (-52617), c-MAF_490 (-26288), c-MAF_310 (+32929) |
| <i>PTGR1</i>   | c-MAF_3849 (+72339)                                                                                                         |

|                |                                                                                                                                                                                                |
|----------------|------------------------------------------------------------------------------------------------------------------------------------------------------------------------------------------------|
| <i>PTH1R</i>   | c-MAF_2489 (+64969), c-MAF_743 (+75882)                                                                                                                                                        |
| <i>PTHLH</i>   | c-MAF_4398 (+149613)                                                                                                                                                                           |
| <i>PTK2</i>    | c-MAF_6596 (-107264), c-MAF_4835 (-105901), c-MAF_3973 (-25818)                                                                                                                                |
| <i>PTK2B</i>   | c-MAF_2368 (+14176), c-MAF_3056 (+40371), c-MAF_1561 (+50679)                                                                                                                                  |
| <i>PTP4A2</i>  | c-MAF_1899 (-43695), c-MAF_513 (-1731), c-MAF_1919 (+1537)                                                                                                                                     |
| <i>PTP4A3</i>  | c-MAF_4722 (+148750)                                                                                                                                                                           |
| <i>PTPLAD2</i> | c-MAF_233 (+2879)                                                                                                                                                                              |
| <i>PTPN1</i>   | c-MAF_524 (-171723), c-MAF_1706 (-160896), c-MAF_2713 (-69347), c-MAF_818 (+36733), c-MAF_658 (+51381)                                                                                         |
| <i>PTPN11</i>  | c-MAF_275 (+44709)                                                                                                                                                                             |
| <i>PTPN13</i>  | c-MAF_5525 (-70795), c-MAF_36 (-49690), c-MAF_2601 (-39366)                                                                                                                                    |
| <i>PTPN14</i>  | c-MAF_5682 (+99511), c-MAF_5801 (+111595)                                                                                                                                                      |
| <i>PTPN2</i>   | c-MAF_2154 (-37143), c-MAF_3825 (+40190), c-MAF_486 (+44418)                                                                                                                                   |
| <i>PTPN3</i>   | c-MAF_4169 (+34059)                                                                                                                                                                            |
| <i>PTPN4</i>   | c-MAF_2802 (-54782), c-MAF_4607 (+68528)                                                                                                                                                       |
| <i>PTPN6</i>   | c-MAF_6593 (+2594)                                                                                                                                                                             |
| <i>PTPN7</i>   | c-MAF_2212 (-4262), c-MAF_2274 (-1401)                                                                                                                                                         |
| <i>PTPN9</i>   | c-MAF_4741 (-18666), c-MAF_806 (-392)                                                                                                                                                          |
| <i>PTPRA</i>   | c-MAF_2429 (+20472)                                                                                                                                                                            |
| <i>PTPRC</i>   | c-MAF_5685 (-27437), c-MAF_4313 (-17513), c-MAF_2705 (+30106), c-MAF_1669 (+43112)                                                                                                             |
| <i>PTPRCAP</i> | c-MAF_6671 (+2576)                                                                                                                                                                             |
| <i>PTPRE</i>   | c-MAF_1287 (+84285), c-MAF_2808 (+119803), c-MAF_4536 (+122298), c-MAF_3748 (+157686)                                                                                                          |
| <i>PTPRJ</i>   | c-MAF_1031 (-116964), c-MAF_5488 (+21343), c-MAF_1124 (+28508), c-MAF_2963 (+31596), c-MAF_6111 (+39748), c-MAF_2994 (+75429), c-MAF_5434 (+103032), c-MAF_2482 (+113385), c-MAF_610 (+129438) |
| <i>PTPRN2</i>  | c-MAF_3290 (-68665)                                                                                                                                                                            |
| <i>PTPRQ</i>   | c-MAF_1795 (-174215)                                                                                                                                                                           |
| <i>PTRH2</i>   | c-MAF_409 (+66557)                                                                                                                                                                             |
| <i>PTRHD1</i>  | c-MAF_6776 (-33173)                                                                                                                                                                            |
| <i>PTTG1IP</i> | c-MAF_3537 (-53816)                                                                                                                                                                            |
| <i>PTTG2</i>   | c-MAF_279 (+172073)                                                                                                                                                                            |
| <i>PUM1</i>    | c-MAF_3764 (+28754), c-MAF_2233 (+146472)                                                                                                                                                      |
| <i>PUM2</i>    | c-MAF_799 (-38117)                                                                                                                                                                             |
| <i>PUS1</i>    | c-MAF_4537 (-32909)                                                                                                                                                                            |
| <i>PUS10</i>   | c-MAF_6196 (+780)                                                                                                                                                                              |
| <i>PVRIG</i>   | c-MAF_6548 (-10093)                                                                                                                                                                            |
| <i>PVRL1</i>   | c-MAF_1122 (+45123), c-MAF_1307 (+113282)                                                                                                                                                      |
| <i>PVRL3</i>   | c-MAF_6527 (+167375)                                                                                                                                                                           |
| <i>PWP1</i>    | c-MAF_2979 (-169867), c-MAF_1141 (+73904)                                                                                                                                                      |
| <i>PWP2</i>    | c-MAF_5378 (-50488), c-MAF_1711 (-23468)                                                                                                                                                       |
| <i>PXK</i>     | c-MAF_5947 (+54336)                                                                                                                                                                            |
| <i>PXN</i>     | c-MAF_1997 (+13579)                                                                                                                                                                            |
| <i>PYCRL</i>   | c-MAF_6437 (+1078)                                                                                                                                                                             |
| <i>PYGB</i>    | c-MAF_336 (-24566), c-MAF_569 (+62486)                                                                                                                                                         |
| <i>PYHINI</i>  | c-MAF_3063 (-739)                                                                                                                                                                              |
| <i>PZP</i>     | c-MAF_4993 (-159610)                                                                                                                                                                           |
| <i>QPCT</i>    | c-MAF_3030 (+45911), c-MAF_2030 (+115172), c-MAF_4926 (+127537)                                                                                                                                |

|                  |                                                                                     |
|------------------|-------------------------------------------------------------------------------------|
| <i>QPRT</i>      | c-MAF_895 (+23428)                                                                  |
| <i>QRFP</i>      | c-MAF_2744 (+127900)                                                                |
| <i>QRFPR</i>     | c-MAF_2538 (+72704), c-MAF_112 (+108332), c-MAF_3096 (+124531), c-MAF_641 (+137430) |
| <i>QSOX2</i>     | c-MAF_3903 (+17282), c-MAF_5372 (+20278)                                            |
| <i>QTRTD1</i>    | c-MAF_3717 (+88393)                                                                 |
| <i>R3HDMI</i>    | c-MAF_4527 (+15105)                                                                 |
| <i>RAB10</i>     | c-MAF_1694 (+27892), c-MAF_913 (+34701)                                             |
| <i>RAB11A</i>    | c-MAF_6035 (-50355), c-MAF_2351 (-36329), c-MAF_1335 (+18327)                       |
| <i>RAB11FIP1</i> | c-MAF_1001 (+5387)                                                                  |
| <i>RAB11FIP4</i> | c-MAF_2579 (-63474), c-MAF_1168 (+102855), c-MAF_4438 (+117351)                     |
| <i>RAB17</i>     | c-MAF_5127 (-83801)                                                                 |
| <i>RAB1A</i>     | c-MAF_6298 (+65009)                                                                 |
| <i>RAB20</i>     | c-MAF_4390 (+105467)                                                                |
| <i>RAB22A</i>    | c-MAF_5959 (-2689)                                                                  |
| <i>RAB27A</i>    | c-MAF_6212 (-12118), c-MAF_1672 (-9498), c-MAF_5012 (+28230), c-MAF_4339 (+32502)   |
| <i>RAB28</i>     | c-MAF_664 (+7232)                                                                   |
| <i>RAB2A</i>     | c-MAF_3064 (+33160), c-MAF_3367 (+42410), c-MAF_4106 (+46586)                       |
| <i>RAB30</i>     | c-MAF_6114 (+111701)                                                                |
| <i>RAB31</i>     | c-MAF_6101 (+169098)                                                                |
| <i>RAB33B</i>    | c-MAF_6523 (+57586), c-MAF_3603 (+101542)                                           |
| <i>RAB35</i>     | c-MAF_1479 (-9833)                                                                  |
| <i>RAB37</i>     | c-MAF_498 (-6095)                                                                   |
| <i>RAB38</i>     | c-MAF_84 (-161179), c-MAF_2321 (+158815)                                            |
| <i>RAB3C</i>     | c-MAF_5042 (+176738)                                                                |
| <i>RAB3GAP1</i>  | c-MAF_3328 (+426)                                                                   |
| <i>RAB44</i>     | c-MAF_5694 (+35561)                                                                 |
| <i>RAB4A</i>     | c-MAF_313 (-17296), c-MAF_746 (+15377)                                              |
| <i>RAB6A</i>     | c-MAF_4885 (-255)                                                                   |
| <i>RAB8A</i>     | c-MAF_4425 (-32294), c-MAF_5876 (+8158)                                             |
| <i>RAB8B</i>     | c-MAF_3148 (+3081), c-MAF_4183 (+22956), c-MAF_1730 (+43130)                        |
| <i>RAB9A</i>     | c-MAF_947 (-27017), c-MAF_4395 (+27593)                                             |
| <i>RABAC1</i>    | c-MAF_6355 (+71369)                                                                 |
| <i>RABGEF1</i>   | c-MAF_6372 (+107782), c-MAF_81 (+119709), c-MAF_3841 (+137025)                      |
| <i>RABIF</i>     | c-MAF_5588 (+54343)                                                                 |
| <i>RABL5</i>     | c-MAF_885 (-30715)                                                                  |
| <i>RAC2</i>      | c-MAF_771 (-31499), c-MAF_6347 (-29456), c-MAF_6619 (+21427)                        |
| <i>RAC3</i>      | c-MAF_2213 (-474)                                                                   |
| <i>RAD23B</i>    | c-MAF_3970 (+26157), c-MAF_251 (+47328)                                             |
| <i>RAD50</i>     | c-MAF_1074 (+72779), c-MAF_1443 (+79114), c-MAF_3492 (+84618)                       |
| <i>RAD51</i>     | c-MAF_3376 (+7110), c-MAF_103 (+49081)                                              |
| <i>RAD52</i>     | c-MAF_4470 (-4322), c-MAF_5707 (+155794), c-MAF_1745 (+179094)                      |
| <i>RALA</i>      | c-MAF_3910 (-33592), c-MAF_6342 (-2095)                                             |
| <i>RALB</i>      | c-MAF_4533 (+4863)                                                                  |
| <i>RALGDS</i>    | c-MAF_6461 (-23178)                                                                 |
| <i>RALGPS1</i>   | c-MAF_1753 (+71202)                                                                 |

|                 |                                                                                                                                                                          |
|-----------------|--------------------------------------------------------------------------------------------------------------------------------------------------------------------------|
| <i>RALGPS2</i>  | c-MAF_3292 (+97023)                                                                                                                                                      |
| <i>RAMP1</i>    | c-MAF_1447 (-41370)                                                                                                                                                      |
| <i>RANBP3</i>   | c-MAF_6396 (-82905)                                                                                                                                                      |
| <i>RANBP6</i>   | c-MAF_3391 (-53462), c-MAF_692 (-34465), c-MAF_2026 (+666), c-MAF_12 (+94605), c-MAF_1891 (+105285)                                                                      |
| <i>RANGAP1</i>  | c-MAF_2897 (-2791)                                                                                                                                                       |
| <i>RAPIA</i>    | c-MAF_258 (-111256), c-MAF_5244 (-108062), c-MAF_3909 (-26755), c-MAF_2481 (-15582)                                                                                      |
| <i>RAPIB</i>    | c-MAF_6134 (-170519), c-MAF_4529 (-158988), c-MAF_3915 (-135467), c-MAF_67 (-129462), c-MAF_1107 (-112928), c-MAF_1171 (-45244), c-MAF_4178 (+1631), c-MAF_1390 (+63053) |
| <i>RAPIGAP</i>  | c-MAF_4675 (-121784)                                                                                                                                                     |
| <i>RAP2A</i>    | c-MAF_3456 (-175848), c-MAF_1249 (-143238), c-MAF_4795 (-90750)                                                                                                          |
| <i>RAP2B</i>    | c-MAF_314 (-23403), c-MAF_4039 (-881), c-MAF_1844 (+59745)                                                                                                               |
| <i>RAPGEF1</i>  | c-MAF_2385 (-129890), c-MAF_5306 (-124345), c-MAF_4208 (-21923), c-MAF_1359 (-19017), c-MAF_6477 (-241), c-MAF_1996 (+64519), c-MAF_2343 (+81822)                        |
| <i>RAPGEF5</i>  | c-MAF_1847 (+87747)                                                                                                                                                      |
| <i>RAPGEF6</i>  | c-MAF_6682 (+27656), c-MAF_1838 (+120119)                                                                                                                                |
| <i>RAPGEFL1</i> | c-MAF_3068 (-24529)                                                                                                                                                      |
| <i>RARA</i>     | c-MAF_1635 (-13016)                                                                                                                                                      |
| <i>RARG</i>     | c-MAF_1446 (+12865)                                                                                                                                                      |
| <i>RARRES3</i>  | c-MAF_6716 (-18059)                                                                                                                                                      |
| <i>RASA1</i>    | c-MAF_5733 (-146354), c-MAF_2164 (+333)                                                                                                                                  |
| <i>RASA2</i>    | c-MAF_2674 (+66259)                                                                                                                                                      |
| <i>RASA3</i>    | c-MAF_6634 (+2969), c-MAF_1009 (+65123)                                                                                                                                  |
| <i>RASAL3</i>   | c-MAF_632 (-2616), c-MAF_6022 (-182)                                                                                                                                     |
| <i>RASGEF1A</i> | c-MAF_6281 (+48387)                                                                                                                                                      |
| <i>RASGRF2</i>  | c-MAF_2550 (+47203)                                                                                                                                                      |
| <i>RASGRP1</i>  | c-MAF_747 (-131635), c-MAF_3929 (-124169), c-MAF_1393 (-120859), c-MAF_5396 (-105914), c-MAF_4103 (-88401), c-MAF_508 (-66494), c-MAF_80 (-46322)                        |
| <i>RASGRP3</i>  | c-MAF_6611 (+21103)                                                                                                                                                      |
| <i>RASGRP4</i>  | c-MAF_1096 (-3068), c-MAF_2140 (-1425)                                                                                                                                   |
| <i>RASSF2</i>   | c-MAF_5773 (+28596)                                                                                                                                                      |
| <i>RASSF3</i>   | c-MAF_1828 (-131672), c-MAF_5212 (+55369)                                                                                                                                |
| <i>RASSF5</i>   | c-MAF_1704 (+49419), c-MAF_4925 (+61392), c-MAF_1567 (+67917), c-MAF_553 (+72674)                                                                                        |
| <i>RASSF6</i>   | c-MAF_2923 (-114736), c-MAF_4994 (-98117), c-MAF_5770 (-91480), c-MAF_5987 (-41011)                                                                                      |
| <i>RASSF8</i>   | c-MAF_3525 (-152538)                                                                                                                                                     |
| <i>RBBP5</i>    | c-MAF_1441 (-82071), c-MAF_316 (-77890), c-MAF_499 (-49571)                                                                                                              |
| <i>RBBP7</i>    | c-MAF_2438 (-13385)                                                                                                                                                      |
| <i>RBCK1</i>    | c-MAF_1975 (+25678)                                                                                                                                                      |
| <i>RBKS</i>     | c-MAF_5609 (-164738), c-MAF_5300 (-113200), c-MAF_480 (-69291)                                                                                                           |
| <i>RBM15</i>    | c-MAF_6744 (-123765), c-MAF_3799 (+10583)                                                                                                                                |
| <i>RBM17</i>    | c-MAF_2378 (-19821), c-MAF_1712 (-5550), c-MAF_3746 (+40915), c-MAF_2076 (+98123)                                                                                        |
| <i>RBM20</i>    | c-MAF_2905 (-74551), c-MAF_3527 (+89366)                                                                                                                                 |
| <i>RBM26</i>    | c-MAF_5467 (-52295), c-MAF_1809 (-45931), c-MAF_6517 (-29059), c-MAF_5636 (-464)                                                                                         |
| <i>RBM3</i>     | c-MAF_6443 (-32904)                                                                                                                                                      |
| <i>RBM33</i>    | c-MAF_1743 (+119685)                                                                                                                                                     |
| <i>RBM34</i>    | c-MAF_5049 (-20661)                                                                                                                                                      |
| <i>RBM38</i>    | c-MAF_6761 (+84927)                                                                                                                                                      |
| <i>RBM44</i>    | c-MAF_545 (-102098), c-MAF_1447 (+19429)                                                                                                                                 |

|               |                                                                                                                             |
|---------------|-----------------------------------------------------------------------------------------------------------------------------|
| <i>RBM48</i>  | c-MAF_255 (+106363), c-MAF_5086 (+110669), c-MAF_4211 (+113373), c-MAF_5152 (+135743)                                       |
| <i>RBMS1</i>  | c-MAF_5569 (+1619), c-MAF_1308 (+161224)                                                                                    |
| <i>RBMS3</i>  | c-MAF_3489 (-127305), c-MAF_3284 (-97562)                                                                                   |
| <i>RBMX</i>   | c-MAF_940 (+12895)                                                                                                          |
| <i>RBPJ</i>   | c-MAF_1348 (-176277), c-MAF_3684 (-168589), c-MAF_3297 (-122136), c-MAF_1452 (-20208), c-MAF_696 (-12311), c-MAF_539 (-528) |
| <i>RBX1</i>   | c-MAF_735 (-52167)                                                                                                          |
| <i>RCAN1</i>  | c-MAF_4851 (-25367), c-MAF_4060 (+68312), c-MAF_4745 (+78119), c-MAF_757 (+88146)                                           |
| <i>RCAN2</i>  | c-MAF_97 (+165492)                                                                                                          |
| <i>RCBTB1</i> | c-MAF_5256 (+87186)                                                                                                         |
| <i>RCBTB2</i> | c-MAF_2686 (+32143)                                                                                                         |
| <i>RCL1</i>   | c-MAF_2355 (+40469), c-MAF_6345 (+178339)                                                                                   |
| <i>RCN3</i>   | c-MAF_6138 (+26525)                                                                                                         |
| <i>RCOR1</i>  | c-MAF_5208 (+61815)                                                                                                         |
| <i>RCOR3</i>  | c-MAF_3109 (-715), c-MAF_116 (+21723)                                                                                       |
| <i>RCSD1</i>  | c-MAF_4448 (-30089), c-MAF_2971 (-1870), c-MAF_4715 (+717), c-MAF_5299 (+8011), c-MAF_631 (+12278)                          |
| <i>RD3</i>    | c-MAF_3515 (+114722)                                                                                                        |
| <i>RDH10</i>  | c-MAF_3123 (+17865), c-MAF_177 (+52158)                                                                                     |
| <i>RDH11</i>  | c-MAF_5902 (+15558)                                                                                                         |
| <i>RDH12</i>  | c-MAF_3296 (+40103)                                                                                                         |
| <i>RDX</i>    | c-MAF_430 (-53100), c-MAF_1679 (-49295), c-MAF_813 (-15301)                                                                 |
| <i>RECQL5</i> | c-MAF_2603 (-24185)                                                                                                         |
| <i>REEP3</i>  | c-MAF_5034 (+52258)                                                                                                         |
| <i>REEP5</i>  | c-MAF_1690 (-41479)                                                                                                         |
| <i>REL</i>    | c-MAF_3812 (-61915)                                                                                                         |
| <i>REP15</i>  | c-MAF_2096 (-28817)                                                                                                         |
| <i>REPS1</i>  | c-MAF_724 (-138121), c-MAF_3089 (-40390)                                                                                    |
| <i>REPS2</i>  | c-MAF_2438 (-63420)                                                                                                         |
| <i>RER1</i>   | c-MAF_2647 (-100895)                                                                                                        |
| <i>RERE</i>   | c-MAF_3899 (-40759), c-MAF_5767 (+94330), c-MAF_1606 (+138121)                                                              |
| <i>RERGL</i>  | c-MAF_6109 (+133030)                                                                                                        |
| <i>RERGL</i>  | c-MAF_3446 (-75550)                                                                                                         |
| <i>RESP18</i> | c-MAF_1636 (-19537)                                                                                                         |
| <i>RET</i>    | c-MAF_2475 (+44048), c-MAF_247 (+52596)                                                                                     |
| <i>RETNLB</i> | c-MAF_473 (-49171), c-MAF_2628 (+157523)                                                                                    |
| <i>REV3L</i>  | c-MAF_1800 (-90803), c-MAF_826 (-4159), c-MAF_5570 (+162)                                                                   |
| <i>RFC1</i>   | c-MAF_2467 (+12479)                                                                                                         |
| <i>RFC3</i>   | c-MAF_6586 (-150889), c-MAF_340 (-138726)                                                                                   |
| <i>RFC5</i>   | c-MAF_1018 (+19033), c-MAF_1142 (+27593)                                                                                    |
| <i>RFFL</i>   | c-MAF_1700 (+8480), c-MAF_1677 (+25579), c-MAF_4347 (+37842)                                                                |
| <i>RFPL2</i>  | c-MAF_3776 (+65343)                                                                                                         |
| <i>RFX2</i>   | c-MAF_6396 (+49489)                                                                                                         |
| <i>RFX3</i>   | c-MAF_4971 (-2708), c-MAF_6367 (+47183)                                                                                     |
| <i>RFX8</i>   | c-MAF_4517 (-177398)                                                                                                        |
| <i>RGCC</i>   | c-MAF_3028 (+7881)                                                                                                          |

|                |                                                                                                      |
|----------------|------------------------------------------------------------------------------------------------------|
| <i>RGS1</i>    | c-MAF_4563 (-45359), c-MAF_643 (-30533), c-MAF_6427 (-16246), c-MAF_5295 (-154)                      |
| <i>RGS10</i>   | c-MAF_6471 (+40554)                                                                                  |
| <i>RGS12</i>   | c-MAF_5604 (-112044)                                                                                 |
| <i>RGS16</i>   | c-MAF_5957 (-10649)                                                                                  |
| <i>RGS2</i>    | c-MAF_2417 (-2928), c-MAF_3293 (+177313)                                                             |
| <i>RGS3</i>    | c-MAF_6003 (+78936), c-MAF_2691 (+134531)                                                            |
| <i>RGS6</i>    | c-MAF_4456 (+117277), c-MAF_6299 (+122488)                                                           |
| <i>RGS8</i>    | c-MAF_5957 (+57857)                                                                                  |
| <i>RGS9</i>    | c-MAF_3356 (-17919), c-MAF_3429 (-15954), c-MAF_4497 (+36275), c-MAF_4148 (+124957)                  |
| <i>RHBDD1</i>  | c-MAF_4953 (+159743)                                                                                 |
| <i>RHBDF2</i>  | c-MAF_889 (-14257), c-MAF_507 (-10518)                                                               |
| <i>RHBDL3</i>  | c-MAF_3513 (+64200)                                                                                  |
| <i>RHCG</i>    | c-MAF_6093 (+137733)                                                                                 |
| <i>RHEB</i>    | c-MAF_3567 (+152386)                                                                                 |
| <i>RHEBL1</i>  | c-MAF_119 (+5932)                                                                                    |
| <i>RHOB</i>    | c-MAF_799 (-81574), c-MAF_6058 (+10078)                                                              |
| <i>RHOBTB3</i> | c-MAF_2944 (+29768)                                                                                  |
| <i>RHOF</i>    | c-MAF_6140 (-619)                                                                                    |
| <i>RHOG</i>    | c-MAF_2036 (-514)                                                                                    |
| <i>RHOH</i>    | c-MAF_6665 (+4275), c-MAF_52 (+30535), c-MAF_5895 (+87389), c-MAF_935 (+94016), c-MAF_5078 (+112998) |
| <i>RHOQ</i>    | c-MAF_6580 (-924)                                                                                    |
| <i>RHOT2</i>   | c-MAF_5239 (-31485)                                                                                  |
| <i>RHPN1</i>   | c-MAF_530 (-7161)                                                                                    |
| <i>RIC8A</i>   | c-MAF_2750 (+405)                                                                                    |
| <i>RIC8B</i>   | c-MAF_2589 (+140531)                                                                                 |
| <i>RICTOR</i>  | c-MAF_4493 (-157375), c-MAF_5803 (-135596), c-MAF_5713 (-128524), c-MAF_1554 (-113776)               |
| <i>RILP</i>    | c-MAF_6662 (-23209)                                                                                  |
| <i>RILPL2</i>  | c-MAF_1974 (-11862), c-MAF_6720 (-32), c-MAF_1866 (+48162)                                           |
| <i>RIMS3</i>   | c-MAF_3017 (+2438)                                                                                   |
| <i>RIN2</i>    | c-MAF_6703 (-58119)                                                                                  |
| <i>RIN3</i>    | c-MAF_5055 (-47449), c-MAF_1824 (+48321), c-MAF_5248 (+72515)                                        |
| <i>RINL</i>    | c-MAF_1594 (+13461)                                                                                  |
| <i>RIPK1</i>   | c-MAF_4125 (-44758)                                                                                  |
| <i>RIPK2</i>   | c-MAF_3241 (+8289)                                                                                   |
| <i>RMDN2</i>   | c-MAF_1000 (-116857), c-MAF_390 (-78477)                                                             |
| <i>RMDN3</i>   | c-MAF_103 (+11596), c-MAF_3376 (+53567)                                                              |
| <i>RMI2</i>    | c-MAF_5705 (+113215)                                                                                 |
| <i>RNASE4</i>  | c-MAF_35 (-2635)                                                                                     |
| <i>RNASET2</i> | c-MAF_324 (+6307), c-MAF_1634 (+13693)                                                               |
| <i>RNF10</i>   | c-MAF_1663 (+5138)                                                                                   |
| <i>RNF103</i>  | c-MAF_420 (+39577)                                                                                   |
| <i>RNF121</i>  | c-MAF_5269 (+33996)                                                                                  |
| <i>RNF122</i>  | c-MAF_6605 (+12118)                                                                                  |
| <i>RNF125</i>  | c-MAF_2858 (+22643), c-MAF_5433 (+66827)                                                             |

|                |                                                                                                                                                                                                |
|----------------|------------------------------------------------------------------------------------------------------------------------------------------------------------------------------------------------|
| <i>RNF135</i>  | c-MAF_5028 (-31054)                                                                                                                                                                            |
| <i>RNF138</i>  | c-MAF_2858 (-50840), c-MAF_5433 (-6656)                                                                                                                                                        |
| <i>RNF144A</i> | c-MAF_5760 (-7375)                                                                                                                                                                             |
| <i>RNF145</i>  | c-MAF_2512 (+1954), c-MAF_5599 (+48141), c-MAF_3121 (+89405)                                                                                                                                   |
| <i>RNF149</i>  | c-MAF_5155 (-19854), c-MAF_4892 (+1736)                                                                                                                                                        |
| <i>RNF152</i>  | c-MAF_3341 (-58654)                                                                                                                                                                            |
| <i>RNF157</i>  | c-MAF_6048 (+2231), c-MAF_419 (+48260)                                                                                                                                                         |
| <i>RNF165</i>  | c-MAF_5187 (-122289), c-MAF_6074 (+18968)                                                                                                                                                      |
| <i>RNF168</i>  | c-MAF_1583 (+929)                                                                                                                                                                              |
| <i>RNF169</i>  | c-MAF_5405 (+19665), c-MAF_1995 (+177590)                                                                                                                                                      |
| <i>RNF17</i>   | c-MAF_6454 (-33135)                                                                                                                                                                            |
| <i>RNF180</i>  | c-MAF_4343 (-17801)                                                                                                                                                                            |
| <i>RNF185</i>  | c-MAF_3158 (+79976)                                                                                                                                                                            |
| <i>RNF187</i>  | c-MAF_528 (-21107), c-MAF_6171 (-7388)                                                                                                                                                         |
| <i>RNF19A</i>  | c-MAF_3362 (-160510), c-MAF_6747 (-148826), c-MAF_5252 (-140142), c-MAF_587 (-135067), c-MAF_293 (-127664), c-MAF_1406 (-95379), c-MAF_2059 (-83010), c-MAF_2500 (-22988), c-MAF_2966 (+84105) |
| <i>RNF19B</i>  | c-MAF_4931 (-40079), c-MAF_3433 (-16489), c-MAF_2243 (+24816), c-MAF_6333 (+28431)                                                                                                             |
| <i>RNF213</i>  | c-MAF_501 (-5951), c-MAF_4832 (+38330)                                                                                                                                                         |
| <i>RNF214</i>  | c-MAF_3680 (-2297)                                                                                                                                                                             |
| <i>RNF216</i>  | c-MAF_1416 (+77172), c-MAF_3905 (+80321), c-MAF_2276 (+139594)                                                                                                                                 |
| <i>RNF223</i>  | c-MAF_4301 (-25600)                                                                                                                                                                            |
| <i>RNF24</i>   | c-MAF_855 (-115595)                                                                                                                                                                            |
| <i>RNF32</i>   | c-MAF_5945 (+39689)                                                                                                                                                                            |
| <i>RNF34</i>   | c-MAF_1409 (+134637)                                                                                                                                                                           |
| <i>RNF38</i>   | c-MAF_4254 (-88296)                                                                                                                                                                            |
| <i>RNF7</i>    | c-MAF_2674 (-184896)                                                                                                                                                                           |
| <i>RNFT1</i>   | c-MAF_2084 (+23716)                                                                                                                                                                            |
| <i>RNPEPL1</i> | c-MAF_1901 (-4629)                                                                                                                                                                             |
| <i>ROR2</i>    | c-MAF_560 (+44123), c-MAF_5822 (+146261), c-MAF_6607 (+160024)                                                                                                                                 |
| <i>RORA</i>    | c-MAF_1159 (-161101), c-MAF_5112 (-93532), c-MAF_1927 (-68512), c-MAF_555 (+44882), c-MAF_366 (+56211), c-MAF_4177 (+64133), c-MAF_4738 (+79086), c-MAF_2023 (+100893)                         |
| <i>RORB</i>    | c-MAF_5811 (+165562)                                                                                                                                                                           |
| <i>RORC</i>    | c-MAF_2019 (-2381), c-MAF_709 (+3777), c-MAF_6208 (+9381)                                                                                                                                      |
| <i>RPA1</i>    | c-MAF_5297 (+40712)                                                                                                                                                                            |
| <i>RPA2</i>    | c-MAF_3495 (+2168), c-MAF_5412 (+23058)                                                                                                                                                        |
| <i>RPA3</i>    | c-MAF_1806 (+37323), c-MAF_1273 (+78401)                                                                                                                                                       |
| <i>RPH3A</i>   | c-MAF_2184 (-125522)                                                                                                                                                                           |
| <i>RPIA</i>    | c-MAF_141 (-52602)                                                                                                                                                                             |
| <i>RPL10</i>   | c-MAF_5584 (+687)                                                                                                                                                                              |
| <i>RPL12</i>   | c-MAF_878 (+24522)                                                                                                                                                                             |
| <i>RPL15</i>   | c-MAF_6552 (+687)                                                                                                                                                                              |
| <i>RPL22L1</i> | c-MAF_4118 (+1167)                                                                                                                                                                             |
| <i>RPL3</i>    | c-MAF_2585 (+1593)                                                                                                                                                                             |
| <i>RPL30</i>   | c-MAF_286 (+66172)                                                                                                                                                                             |
| <i>RPL31</i>   | c-MAF_1455 (-77270)                                                                                                                                                                            |
| <i>RPL36AL</i> | c-MAF_3106 (+138)                                                                                                                                                                              |



|                |                                                                                   |
|----------------|-----------------------------------------------------------------------------------|
| <i>RPL39</i>   | c-MAF_6650 (+35404)                                                               |
| <i>RPL39L</i>  | c-MAF_6546 (+113997)                                                              |
| <i>RPL7L1</i>  | c-MAF_2365 (-107847), c-MAF_5511 (-65480)                                         |
| <i>RPLP0</i>   | c-MAF_1997 (-51082), c-MAF_2344 (-1180)                                           |
| <i>RPLP1</i>   | c-MAF_2773 (+121436)                                                              |
| <i>RPP21</i>   | c-MAF_14 (+105864), c-MAF_6107 (+108553), c-MAF_4348 (+118569)                    |
| <i>RPP25</i>   | c-MAF_3036 (-7582)                                                                |
| <i>RPP40</i>   | c-MAF_561 (+61716), c-MAF_6664 (+68377), c-MAF_4750 (+75475)                      |
| <i>RPRD2</i>   | c-MAF_3217 (-427), c-MAF_5701 (+22016)                                            |
| <i>RPS13</i>   | c-MAF_2089 (-83932), c-MAF_1662 (-68239)                                          |
| <i>RPS16</i>   | c-MAF_1187 (+4996)                                                                |
| <i>RPS25</i>   | c-MAF_3224 (-10947)                                                               |
| <i>RPS27</i>   | c-MAF_5165 (+147308)                                                              |
| <i>RPS27A</i>  | c-MAF_4335 (-169053)                                                              |
| <i>RPS3A</i>   | c-MAF_1197 (-69533), c-MAF_1633 (-67324)                                          |
| <i>RPS6</i>    | c-MAF_2477 (+147127)                                                              |
| <i>RPS6KA1</i> | c-MAF_4672 (-3486), c-MAF_3969 (+10722), c-MAF_1647 (+32375), c-MAF_1825 (+35204) |
| <i>RPS6KA2</i> | c-MAF_324 (-87844), c-MAF_1634 (-80458)                                           |
| <i>RPS6KA3</i> | c-MAF_4725 (+28914)                                                               |
| <i>RPS6KA4</i> | c-MAF_5528 (-27291), c-MAF_4762 (-19572)                                          |
| <i>RPS6KA5</i> | c-MAF_6096 (-8313), c-MAF_2294 (+15417), c-MAF_2379 (+30587)                      |
| <i>RPS6KB1</i> | c-MAF_2084 (+47839)                                                               |
| <i>RPS6KB2</i> | c-MAF_6671 (+6990)                                                                |
| <i>RPS6KC1</i> | c-MAF_6480 (+564)                                                                 |
| <i>RPS9</i>    | c-MAF_2208 (+10202)                                                               |
| <i>RPTOR</i>   | c-MAF_3878 (+176037)                                                              |
| <i>RPUSD2</i>  | c-MAF_5312 (-75864)                                                               |
| <i>RQCD1</i>   | c-MAF_6465 (+120)                                                                 |
| <i>RRAGD</i>   | c-MAF_5506 (-115497), c-MAF_4924 (+27013)                                         |
| <i>RRAS2</i>   | c-MAF_5693 (+21980)                                                               |
| <i>RRBP1</i>   | c-MAF_3520 (+72185)                                                               |
| <i>RREB1</i>   | c-MAF_2566 (+1832), c-MAF_6157 (+80952)                                           |
| <i>RRM1</i>    | c-MAF_1497 (-139596), c-MAF_2255 (+23364)                                         |
| <i>RRM2</i>    | c-MAF_1783 (+1684), c-MAF_4457 (+175806)                                          |
| <i>RRP12</i>   | c-MAF_468 (-11826)                                                                |
| <i>RRP7A</i>   | c-MAF_3696 (+76139)                                                               |
| <i>RSAD2</i>   | c-MAF_5760 (+32352)                                                               |
| <i>RSG1</i>    | c-MAF_5648 (-131342)                                                              |
| <i>RSL1D1</i>  | c-MAF_5406 (+53997)                                                               |
| <i>RSL24D1</i> | c-MAF_5012 (-45097), c-MAF_4339 (-40825)                                          |
| <i>RSPH1</i>   | c-MAF_2818 (+56260), c-MAF_1188 (+71012)                                          |
| <i>RSPH6A</i>  | c-MAF_2511 (+5398)                                                                |
| <i>RSPH9</i>   | c-MAF_2487 (+25179)                                                               |
| <i>RTCA</i>    | c-MAF_848 (-7)                                                                    |
| <i>RTF1</i>    | c-MAF_6598 (+36869), c-MAF_3745 (+49763)                                          |

|                |                                                                                                                                                                                                                                                                                                |
|----------------|------------------------------------------------------------------------------------------------------------------------------------------------------------------------------------------------------------------------------------------------------------------------------------------------|
| <i>RTFDC1</i>  | c-MAF_2618 (-53405), c-MAF_2211 (-45981), c-MAF_4184 (-38852), c-MAF_6072 (-34625), c-MAF_374 (-13515), c-MAF_5878 (-4977), c-MAF_831 (-165)                                                                                                                                                   |
| <i>RTN2</i>    | c-MAF_822 (+18074)                                                                                                                                                                                                                                                                             |
| <i>RTN4</i>    | c-MAF_4335 (-12805)                                                                                                                                                                                                                                                                            |
| <i>RTN4IP1</i> | c-MAF_3081 (+76471), c-MAF_2180 (+101295), c-MAF_1104 (+108338)                                                                                                                                                                                                                                |
| <i>RTN4RL1</i> | c-MAF_5297 (+154188)                                                                                                                                                                                                                                                                           |
| <i>RTP3</i>    | c-MAF_4958 (+19686)                                                                                                                                                                                                                                                                            |
| <i>RTTN</i>    | c-MAF_6267 (-22704), c-MAF_2021 (+11539)                                                                                                                                                                                                                                                       |
| <i>RUFY3</i>   | c-MAF_4898 (+12619)                                                                                                                                                                                                                                                                            |
| <i>RUNX1</i>   | c-MAF_516 (-90144), c-MAF_1054 (-47933), c-MAF_3786 (-39264), c-MAF_571 (+351), c-MAF_880 (+12713), c-MAF_624 (+22230), c-MAF_464 (+52661), c-MAF_65 (+65485), c-MAF_5317 (+74907), c-MAF_3431 (+80458), c-MAF_1598 (+86689), c-MAF_2768 (+151354), c-MAF_3598 (+161130), c-MAF_2760 (+167425) |
| <i>RUNX2</i>   | c-MAF_5216 (-163867), c-MAF_6265 (-154328), c-MAF_3663 (+23542)                                                                                                                                                                                                                                |
| <i>RUNX3</i>   | c-MAF_6006 (-57874), c-MAF_4500 (-175), c-MAF_3647 (+9701), c-MAF_3273 (+39766), c-MAF_2863 (+44558)                                                                                                                                                                                           |
| <i>RUSC2</i>   | c-MAF_4351 (+32340)                                                                                                                                                                                                                                                                            |
| <i>RXFP2</i>   | c-MAF_941 (+67695)                                                                                                                                                                                                                                                                             |
| <i>RXRA</i>    | c-MAF_1176 (+80821)                                                                                                                                                                                                                                                                            |
| <i>RYBP</i>    | c-MAF_4826 (-91765), c-MAF_3518 (-59136), c-MAF_4863 (+107672), c-MAF_2586 (+176683)                                                                                                                                                                                                           |
| <i>RYR1</i>    | c-MAF_1096 (-4600), c-MAF_2646 (+125966)                                                                                                                                                                                                                                                       |
| <i>SI00A10</i> | c-MAF_5279 (+715)                                                                                                                                                                                                                                                                              |
| <i>SI00A11</i> | c-MAF_3221 (-12961)                                                                                                                                                                                                                                                                            |
| <i>SI00A5</i>  | c-MAF_5589 (-3096)                                                                                                                                                                                                                                                                             |
| <i>SI00B</i>   | c-MAF_312 (+104530)                                                                                                                                                                                                                                                                            |
| <i>SIPR1</i>   | c-MAF_1978 (-57936), c-MAF_5457 (+23043), c-MAF_3321 (+54168), c-MAF_3237 (+56825)                                                                                                                                                                                                             |
| <i>SIPR2</i>   | c-MAF_578 (-4954)                                                                                                                                                                                                                                                                              |
| <i>SIPR4</i>   | c-MAF_5158 (-36516), c-MAF_6676 (-23570)                                                                                                                                                                                                                                                       |
| <i>SACMIL</i>  | c-MAF_4562 (-21074), c-MAF_2946 (+1371), c-MAF_2758 (+83682)                                                                                                                                                                                                                                   |
| <i>SAE1</i>    | c-MAF_1587 (+18834), c-MAF_3086 (+51651), c-MAF_2974 (+55812)                                                                                                                                                                                                                                  |
| <i>SAMD11</i>  | c-MAF_4760 (-146966)                                                                                                                                                                                                                                                                           |
| <i>SAMD3</i>   | c-MAF_2977 (-16427)                                                                                                                                                                                                                                                                            |
| <i>SAMD4A</i>  | c-MAF_6684 (+78927), c-MAF_5746 (+162636)                                                                                                                                                                                                                                                      |
| <i>SAMHDI</i>  | c-MAF_1789 (+4744)                                                                                                                                                                                                                                                                             |
| <i>SAMSN1</i>  | c-MAF_5204 (-47207), c-MAF_5266 (-26090), c-MAF_3027 (+1363), c-MAF_1507 (+37102), c-MAF_999 (+49348), c-MAF_408 (+59923), c-MAF_2935 (+101022), c-MAF_122 (+129795)                                                                                                                           |
| <i>SAP30L</i>  | c-MAF_3322 (-172680)                                                                                                                                                                                                                                                                           |
| <i>SAR1B</i>   | c-MAF_1658 (+6421)                                                                                                                                                                                                                                                                             |
| <i>SARS</i>    | c-MAF_5936 (-51441)                                                                                                                                                                                                                                                                            |
| <i>SART1</i>   | c-MAF_171 (-20072)                                                                                                                                                                                                                                                                             |
| <i>SASH3</i>   | c-MAF_179 (-20066), c-MAF_3784 (+1632)                                                                                                                                                                                                                                                         |
| <i>SATB1</i>   | c-MAF_1210 (-132004)                                                                                                                                                                                                                                                                           |
| <i>SAV1</i>    | c-MAF_4107 (-94148)                                                                                                                                                                                                                                                                            |
| <i>SAYSDI</i>  | c-MAF_3307 (-107159)                                                                                                                                                                                                                                                                           |
| <i>SBF1</i>    | c-MAF_6609 (+5021)                                                                                                                                                                                                                                                                             |
| <i>SBNO2</i>   | c-MAF_4231 (-18159), c-MAF_6726 (+41874)                                                                                                                                                                                                                                                       |
| <i>SC5D</i>    | c-MAF_5327 (+19130)                                                                                                                                                                                                                                                                            |
| <i>SCAF11</i>  | c-MAF_4322 (-125)                                                                                                                                                                                                                                                                              |
| <i>SCAF8</i>   | c-MAF_1652 (-127895)                                                                                                                                                                                                                                                                           |

|                |                                                                                                       |
|----------------|-------------------------------------------------------------------------------------------------------|
| <i>SCAMP1</i>  | c-MAF_6189 (+184129)                                                                                  |
| <i>SCAMP2</i>  | c-MAF_5546 (+2374)                                                                                    |
| <i>SCAMP5</i>  | c-MAF_3036 (-30552)                                                                                   |
| <i>SCAND1</i>  | c-MAF_773 (+4536)                                                                                     |
| <i>SCARA5</i>  | c-MAF_1387 (-86233)                                                                                   |
| <i>SCARB1</i>  | c-MAF_6286 (-47120), c-MAF_4753 (+88983), c-MAF_6368 (+123088)                                        |
| <i>SCARF2</i>  | c-MAF_5892 (-37053)                                                                                   |
| <i>SCD</i>     | c-MAF_254 (+26937)                                                                                    |
| <i>SCG2</i>    | c-MAF_3402 (-158635)                                                                                  |
| <i>SCGB1A1</i> | c-MAF_943 (+8967)                                                                                     |
| <i>SCGB2A2</i> | c-MAF_6735 (-3342)                                                                                    |
| <i>SCLY</i>    | c-MAF_3714 (-62110)                                                                                   |
| <i>SCMH1</i>   | c-MAF_1077 (-172127)                                                                                  |
| <i>SCML4</i>   | c-MAF_1495 (-114), c-MAF_6486 (+107450)                                                               |
| <i>SCN2B</i>   | c-MAF_3419 (-39917)                                                                                   |
| <i>SCN3B</i>   | c-MAF_6414 (+110707)                                                                                  |
| <i>SCN4A</i>   | c-MAF_2515 (-26075)                                                                                   |
| <i>SCO2</i>    | c-MAF_1822 (+687)                                                                                     |
| <i>SCPEP1</i>  | c-MAF_2520 (+31025)                                                                                   |
| <i>SCT</i>     | c-MAF_5060 (-1642)                                                                                    |
| <i>SCUBE1</i>  | c-MAF_5966 (+79408)                                                                                   |
| <i>SCUBE2</i>  | c-MAF_1930 (-172511), c-MAF_2099 (-110352)                                                            |
| <i>SCYL1</i>   | c-MAF_4887 (-104844), c-MAF_2310 (-52762)                                                             |
| <i>SCYL3</i>   | c-MAF_2267 (-195)                                                                                     |
| <i>SDC3</i>    | c-MAF_3764 (-128180), c-MAF_2233 (-10462), c-MAF_4709 (+142616)                                       |
| <i>SDC4</i>    | c-MAF_6661 (-9056), c-MAF_668 (-6382)                                                                 |
| <i>SDCBP2</i>  | c-MAF_2182 (+2564)                                                                                    |
| <i>SDHAF2</i>  | c-MAF_982 (+16239)                                                                                    |
| <i>SDHC</i>    | c-MAF_194 (+37366), c-MAF_2509 (+72387), c-MAF_6569 (+85252)                                          |
| <i>SDIM1</i>   | c-MAF_5765 (+129644)                                                                                  |
| <i>SEC11A</i>  | c-MAF_3265 (-19886), c-MAF_1280 (+16737)                                                              |
| <i>SEC14L1</i> | c-MAF_4834 (-90520)                                                                                   |
| <i>SEC16A</i>  | c-MAF_3779 (-62152), c-MAF_2028 (-56437)                                                              |
| <i>SEC22C</i>  | c-MAF_2701 (-8790)                                                                                    |
| <i>SEC24C</i>  | c-MAF_2484 (-177)                                                                                     |
| <i>SEC24D</i>  | c-MAF_2298 (+815), c-MAF_4405 (+59499), c-MAF_4521 (+106151)                                          |
| <i>SEC31B</i>  | c-MAF_2915 (+13218)                                                                                   |
| <i>SEC61A2</i> | c-MAF_2314 (-16729)                                                                                   |
| <i>SEC61B</i>  | c-MAF_4758 (+37513)                                                                                   |
| <i>SEC63</i>   | c-MAF_6711 (-84812)                                                                                   |
| <i>SECTM1</i>  | c-MAF_2871 (+945)                                                                                     |
| <i>SEHIL</i>   | c-MAF_2154 (-26643)                                                                                   |
| <i>SELIL3</i>  | c-MAF_3286 (+1245), c-MAF_5387 (+7861)                                                                |
| <i>SELPLG</i>  | c-MAF_2790 (-59825), c-MAF_6257 (-32830), c-MAF_3271 (-21157), c-MAF_1493 (-1707), c-MAF_270 (+14802) |
| <i>SEMA4A</i>  | c-MAF_1834 (+8076)                                                                                    |

|                 |                                                                                                                                                  |
|-----------------|--------------------------------------------------------------------------------------------------------------------------------------------------|
| <i>SEMA4C</i>   | c-MAF_1788 (-107803)                                                                                                                             |
| <i>SEMA4D</i>   | c-MAF_4120 (-83518), c-MAF_777 (-59184), c-MAF_327 (-1313)                                                                                       |
| <i>SEMA7A</i>   | c-MAF_2639 (+31480), c-MAF_3259 (+34510)                                                                                                         |
| <i>SEPNI</i>    | c-MAF_2888 (-95591)                                                                                                                              |
| <i>SEPP1</i>    | c-MAF_1203 (-181243), c-MAF_1261 (-137895), c-MAF_3974 (+93302)                                                                                  |
| <i>SEPSECS</i>  | c-MAF_3245 (-217)                                                                                                                                |
| <i>10-Sep</i>   | c-MAF_5211 (+9317)                                                                                                                               |
| <i>11-Sep</i>   | c-MAF_3736 (+35253), c-MAF_5321 (+76487)                                                                                                         |
| <i>2-Sep</i>    | c-MAF_5815 (-9426), c-MAF_2866 (-5025)                                                                                                           |
| <i>6-Sep</i>    | c-MAF_6650 (-62869), c-MAF_1252 (+34040), c-MAF_627 (+38023), c-MAF_6283 (+44702)                                                                |
| <i>9-Sep</i>    | c-MAF_2620 (+51861), c-MAF_742 (+62088), c-MAF_2676 (+108495), c-MAF_6483 (+131744), c-MAF_6261 (+164260), c-MAF_5341 (+172564)                  |
| <i>SERAC1</i>   | c-MAF_5540 (+114806), c-MAF_5699 (+127806), c-MAF_905 (+141514)                                                                                  |
| <i>SERBP1</i>   | c-MAF_5426 (+90555), c-MAF_4129 (+94852), c-MAF_654 (+97102)                                                                                     |
| <i>SERINC2</i>  | c-MAF_5923 (+147483)                                                                                                                             |
| <i>SERINC5</i>  | c-MAF_3033 (+1167), c-MAF_93 (+9477), c-MAF_2969 (+115619)                                                                                       |
| <i>SERP1</i>    | c-MAF_3422 (-3036)                                                                                                                               |
| <i>SERP2</i>    | c-MAF_6247 (-175783)                                                                                                                             |
| <i>SERPINA3</i> | c-MAF_5257 (+92939)                                                                                                                              |
| <i>SERPINB1</i> | c-MAF_3317 (-15826), c-MAF_1456 (-12020)                                                                                                         |
| <i>SERPINB6</i> | c-MAF_2125 (-28857), c-MAF_1871 (+20682)                                                                                                         |
| <i>SERPINB9</i> | c-MAF_1871 (-37365), c-MAF_3317 (+45448), c-MAF_1456 (+49254)                                                                                    |
| <i>SERPINE1</i> | c-MAF_4216 (-26799)                                                                                                                              |
| <i>SERPINH1</i> | c-MAF_6448 (-27945)                                                                                                                              |
| <i>SERTAD2</i>  | c-MAF_2593 (-97785)                                                                                                                              |
| <i>SESN1</i>    | c-MAF_2658 (+173080)                                                                                                                             |
| <i>SESN3</i>    | c-MAF_1892 (+1365)                                                                                                                               |
| <i>SETBP1</i>   | c-MAF_6308 (+44947), c-MAF_3181 (+49047), c-MAF_3961 (+52780)                                                                                    |
| <i>SETD1B</i>   | c-MAF_2536 (-4636)                                                                                                                               |
| <i>SETD3</i>    | c-MAF_3830 (+945), c-MAF_858 (+44113)                                                                                                            |
| <i>SETD4</i>    | c-MAF_4876 (+11810)                                                                                                                              |
| <i>SETD6</i>    | c-MAF_3285 (-20253)                                                                                                                              |
| <i>SETD7</i>    | c-MAF_3603 (+1425), c-MAF_6523 (+45381)                                                                                                          |
| <i>SETD8</i>    | c-MAF_1866 (+4782)                                                                                                                               |
| <i>SETD9</i>    | c-MAF_2654 (-91602)                                                                                                                              |
| <i>SETMAR</i>   | c-MAF_5581 (+48335), c-MAF_6166 (+90866), c-MAF_4749 (+98431), c-MAF_4730 (+107114)                                                              |
| <i>SF3A2</i>    | c-MAF_4522 (-67384)                                                                                                                              |
| <i>SF3B1</i>    | c-MAF_248 (+107284)                                                                                                                              |
| <i>SF3B5</i>    | c-MAF_3107 (-35926)                                                                                                                              |
| <i>SFMBT2</i>   | c-MAF_4663 (-75274), c-MAF_2214 (-169), c-MAF_1949 (+95026), c-MAF_2937 (+132957), c-MAF_481 (+136979), c-MAF_27 (+139792), c-MAF_1638 (+153287) |
| <i>SFRP1</i>    | c-MAF_6559 (-104736)                                                                                                                             |
| <i>SFSWAP</i>   | c-MAF_268 (-104649)                                                                                                                              |
| <i>SFT2D2</i>   | c-MAF_1195 (+11362)                                                                                                                              |
| <i>SFT2D3</i>   | c-MAF_6503 (+188)                                                                                                                                |
| <i>SFTPB</i>    | c-MAF_5072 (+25822)                                                                                                                              |

|                 |                                                                                                                                                 |
|-----------------|-------------------------------------------------------------------------------------------------------------------------------------------------|
| <i>SFXN2</i>    | c-MAF_784 (-3679), c-MAF_902 (+5172)                                                                                                            |
| <i>SFXN4</i>    | c-MAF_543 (+30225), c-MAF_4734 (+44973)                                                                                                         |
| <i>SFXN5</i>    | c-MAF_2207 (+789)                                                                                                                               |
| <i>SGCE</i>     | c-MAF_4623 (+145154)                                                                                                                            |
| <i>SGK1</i>     | c-MAF_6217 (-98833), c-MAF_292 (+29095), c-MAF_3184 (+81784), c-MAF_3565 (+139823)                                                              |
| <i>SGK3</i>     | c-MAF_3881 (-95179)                                                                                                                             |
| <i>SGMS1</i>    | c-MAF_2141 (-12784), c-MAF_2693 (+115431), c-MAF_1377 (+121805)                                                                                 |
| <i>SGOL1</i>    | c-MAF_1298 (+81674), c-MAF_48 (+128704), c-MAF_3532 (+137885), c-MAF_1623 (+144702)                                                             |
| <i>SGPP1</i>    | c-MAF_6750 (-31976)                                                                                                                             |
| <i>SGPP2</i>    | c-MAF_6531 (+148157)                                                                                                                            |
| <i>SGSM1</i>    | c-MAF_1277 (-4249), c-MAF_4739 (+120808)                                                                                                        |
| <i>SGSM3</i>    | c-MAF_3989 (+164551)                                                                                                                            |
| <i>SH2B2</i>    | c-MAF_5532 (-162895)                                                                                                                            |
| <i>SH2B3</i>    | c-MAF_1095 (-1075), c-MAF_3880 (+24395), c-MAF_300 (+39096), c-MAF_2168 (+140296)                                                               |
| <i>SH2D1A</i>   | c-MAF_722 (-133441), c-MAF_6452 (-128489), c-MAF_6291 (-113592), c-MAF_4426 (-106779), c-MAF_3848 (-88097), c-MAF_974 (-3759), c-MAF_1046 (+72) |
| <i>SH2D2A</i>   | c-MAF_1375 (+58)                                                                                                                                |
| <i>SH2D3C</i>   | c-MAF_5046 (+2070)                                                                                                                              |
| <i>SH2D4A</i>   | c-MAF_1614 (+51687), c-MAF_3129 (+159969), c-MAF_5263 (+162036)                                                                                 |
| <i>SH3BP5</i>   | c-MAF_2833 (+57127)                                                                                                                             |
| <i>SH3KBP1</i>  | c-MAF_713 (+46600), c-MAF_6771 (+76580), c-MAF_3669 (+95723), c-MAF_1467 (+135998), c-MAF_5079 (+139623)                                        |
| <i>SH3PXD2A</i> | c-MAF_5278 (-55627), c-MAF_4845 (+9147), c-MAF_5723 (+42626), c-MAF_5501 (+54507), c-MAF_1924 (+97525)                                          |
| <i>SH3PXD2B</i> | c-MAF_2117 (+10776)                                                                                                                             |
| <i>SH3RF1</i>   | c-MAF_6272 (+45502)                                                                                                                             |
| <i>SH3RF3</i>   | c-MAF_228 (+84556), c-MAF_1732 (+88907), c-MAF_3946 (+101660), c-MAF_2394 (+172390)                                                             |
| <i>SH3TC1</i>   | c-MAF_1664 (+29395)                                                                                                                             |
| <i>SHC4</i>     | c-MAF_5680 (-73567), c-MAF_2798 (-60054), c-MAF_5601 (+17126), c-MAF_320 (+22709), c-MAF_4827 (+34299), c-MAF_5214 (+83280)                     |
| <i>SHH</i>      | c-MAF_5945 (-868200), c-MAF_6103 (-812043), c-MAF_6233 (-150128), c-MAF_1743 (+47909)                                                           |
| <i>SHISA4</i>   | c-MAF_6118 (-5607)                                                                                                                              |
| <i>SHISA5</i>   | c-MAF_109 (+21034)                                                                                                                              |
| <i>SHISA8</i>   | c-MAF_1200 (+41128), c-MAF_447 (+55174)                                                                                                         |
| <i>SHKBP1</i>   | c-MAF_6412 (-53257)                                                                                                                             |
| <i>SHPRH</i>    | c-MAF_3500 (+59290), c-MAF_306 (+144144)                                                                                                        |
| <i>SHQ1</i>     | c-MAF_2206 (+169387)                                                                                                                            |
| <i>SIAH1</i>    | c-MAF_5607 (-92660), c-MAF_1550 (-48283), c-MAF_4468 (-689), c-MAF_3895 (+50566)                                                                |
| <i>SIAH2</i>    | c-MAF_5041 (-21356), c-MAF_85 (+25279)                                                                                                          |
| <i>SIGLEC10</i> | c-MAF_3508 (-24057)                                                                                                                             |
| <i>SIGLEC8</i>  | c-MAF_3508 (+16699)                                                                                                                             |
| <i>SIGLECL1</i> | c-MAF_3966 (-11447), c-MAF_4230 (+14817)                                                                                                        |
| <i>SIK1</i>     | c-MAF_4095 (-83782), c-MAF_5618 (+74094)                                                                                                        |
| <i>SIK2</i>     | c-MAF_2434 (-37095), c-MAF_3249 (+70647)                                                                                                        |
| <i>SIK3</i>     | c-MAF_1156 (+20075), c-MAF_4514 (+25501), c-MAF_6687 (+35506), c-MAF_3491 (+71046), c-MAF_4556 (+90010)                                         |
| <i>SIKE1</i>    | c-MAF_5860 (+24446)                                                                                                                             |
| <i>SIL1</i>     | c-MAF_350 (+52877)                                                                                                                              |

|                 |                                                                                                                                                    |
|-----------------|----------------------------------------------------------------------------------------------------------------------------------------------------|
| <i>SIPAIL1</i>  | c-MAF_5475 (-182557), c-MAF_1228 (-129967)                                                                                                         |
| <i>SIRPG</i>    | c-MAF_2038 (-2514)                                                                                                                                 |
| <i>SIRT3</i>    | c-MAF_5169 (-293)                                                                                                                                  |
| <i>SIRT7</i>    | c-MAF_778 (-6850)                                                                                                                                  |
| <i>SITI</i>     | c-MAF_5178 (+14806)                                                                                                                                |
| <i>SIVAI</i>    | c-MAF_1321 (-6800)                                                                                                                                 |
| <i>SKAP1</i>    | c-MAF_6204 (-53345), c-MAF_712 (-48382), c-MAF_1590 (-29129), c-MAF_4957 (-11348), c-MAF_4950 (+12932), c-MAF_2868 (+135734), c-MAF_2889 (+164174) |
| <i>SKI</i>      | c-MAF_2647 (+62243)                                                                                                                                |
| <i>SKIV2L2</i>  | c-MAF_1266 (+132683)                                                                                                                               |
| <i>SKPI</i>     | c-MAF_2202 (+38472), c-MAF_3467 (+44289)                                                                                                           |
| <i>SLA</i>      | c-MAF_2143 (-110882), c-MAF_1810 (-78886), c-MAF_602 (-32501), c-MAF_26 (-11832), c-MAF_4073 (+80993), c-MAF_754 (+141997)                         |
| <i>SLA2</i>     | c-MAF_2029 (-87167)                                                                                                                                |
| <i>SLAIN2</i>   | c-MAF_2290 (-3366), c-MAF_2792 (-299)                                                                                                              |
| <i>SLAMF1</i>   | c-MAF_3976 (-38239), c-MAF_4560 (-35997), c-MAF_5168 (-26036), c-MAF_2778 (-18617)                                                                 |
| <i>SLAMF6</i>   | c-MAF_4610 (-53220), c-MAF_2661 (-45029), c-MAF_5150 (-35345), c-MAF_2753 (+62232)                                                                 |
| <i>SLC10A6</i>  | c-MAF_6495 (-78796)                                                                                                                                |
| <i>SLC11A2</i>  | c-MAF_5799 (+48381)                                                                                                                                |
| <i>SLC12A3</i>  | c-MAF_5157 (-93407), c-MAF_6683 (-75593)                                                                                                           |
| <i>SLC12A8</i>  | c-MAF_3282 (-3521)                                                                                                                                 |
| <i>SLC15A1</i>  | c-MAF_4026 (+181580)                                                                                                                               |
| <i>SLC16A1</i>  | c-MAF_6060 (+51828)                                                                                                                                |
| <i>SLC16A11</i> | c-MAF_4316 (-16711)                                                                                                                                |
| <i>SLC16A4</i>  | c-MAF_3799 (+41993)                                                                                                                                |
| <i>SLC16A5</i>  | c-MAF_3633 (-22966)                                                                                                                                |
| <i>SLC16A6</i>  | c-MAF_2557 (-147081), c-MAF_3399 (-109190), c-MAF_1116 (-65588), c-MAF_6054 (-58317), c-MAF_2795 (-1033)                                           |
| <i>SLC16A7</i>  | c-MAF_1777 (-91777)                                                                                                                                |
| <i>SLC17A2</i>  | c-MAF_5969 (+32172)                                                                                                                                |
| <i>SLC17A3</i>  | c-MAF_5969 (-24196)                                                                                                                                |
| <i>SLC17A5</i>  | c-MAF_745 (-13585), c-MAF_5993 (+811), c-MAF_3765 (+67472), c-MAF_2499 (+73482)                                                                    |
| <i>SLC19A1</i>  | c-MAF_5998 (-72964), c-MAF_1147 (-50036), c-MAF_5301 (-12420)                                                                                      |
| <i>SLC19A2</i>  | c-MAF_2908 (-99101), c-MAF_702 (-6187)                                                                                                             |
| <i>SLC19A3</i>  | c-MAF_6025 (-70725), c-MAF_282 (-57352)                                                                                                            |
| <i>SLC1A1</i>   | c-MAF_1601 (-183801)                                                                                                                               |
| <i>SLC1A2</i>   | c-MAF_4915 (+26996)                                                                                                                                |
| <i>SLC1A4</i>   | c-MAF_2220 (-71413)                                                                                                                                |
| <i>SLC20A1</i>  | c-MAF_5429 (+46743)                                                                                                                                |
| <i>SLC22A1</i>  | c-MAF_5235 (-144870), c-MAF_1445 (-142437), c-MAF_5480 (-21083)                                                                                    |
| <i>SLC22A12</i> | c-MAF_3640 (+30082)                                                                                                                                |
| <i>SLC22A16</i> | c-MAF_2463 (-114453)                                                                                                                               |
| <i>SLC22A3</i>  | c-MAF_3031 (+114412)                                                                                                                               |
| <i>SLC22A5</i>  | c-MAF_4654 (+57049)                                                                                                                                |
| <i>SLC22A7</i>  | c-MAF_1956 (-40779)                                                                                                                                |
| <i>SLC24A2</i>  | c-MAF_4604 (-89922), c-MAF_5941 (+38106)                                                                                                           |
| <i>SLC24A4</i>  | c-MAF_5055 (+142720)                                                                                                                               |

|                 |                                                                                  |
|-----------------|----------------------------------------------------------------------------------|
| <i>SLC24A5</i>  | c-MAF_6599 (-159192)                                                             |
| <i>SLC25A15</i> | c-MAF_5748 (-12695), c-MAF_4086 (-2213)                                          |
| <i>SLC25A17</i> | c-MAF_791 (+87636), c-MAF_500 (+107668)                                          |
| <i>SLC25A19</i> | c-MAF_1576 (-84392), c-MAF_5358 (-28302)                                         |
| <i>SLC25A20</i> | c-MAF_3590 (+1808)                                                               |
| <i>SLC25A30</i> | c-MAF_5838 (+22097)                                                              |
| <i>SLC25A33</i> | c-MAF_3512 (-126221), c-MAF_6290 (-112942)                                       |
| <i>SLC25A40</i> | c-MAF_2783 (-1461)                                                               |
| <i>SLC25A44</i> | c-MAF_1834 (-32486)                                                              |
| <i>SLC26A11</i> | c-MAF_501 (+34487)                                                               |
| <i>SLC26A4</i>  | c-MAF_1863 (-764)                                                                |
| <i>SLC26A5</i>  | c-MAF_4731 (+61474)                                                              |
| <i>SLC26A8</i>  | c-MAF_830 (+51031)                                                               |
| <i>SLC27A2</i>  | c-MAF_749 (-44616), c-MAF_5036 (-5044), c-MAF_6061 (+67082), c-MAF_1282 (+78390) |
| <i>SLC2A12</i>  | c-MAF_3184 (-183638), c-MAF_3565 (-125599)                                       |
| <i>SLC2A3</i>   | c-MAF_4400 (-53876), c-MAF_2250 (-34365), c-MAF_1299 (-24648), c-MAF_2865 (-236) |
| <i>SLC2A8</i>   | c-MAF_1477 (-8569)                                                               |
| <i>SLC2A9</i>   | c-MAF_4258 (-85263), c-MAF_2095 (-74925), c-MAF_5778 (-72548)                    |
| <i>SLC30A1</i>  | c-MAF_4431 (-34686)                                                              |
| <i>SLC30A4</i>  | c-MAF_1294 (+65925)                                                              |
| <i>SLC31A1</i>  | c-MAF_4325 (-1413)                                                               |
| <i>SLC31A2</i>  | c-MAF_1710 (+5196), c-MAF_4035 (+64328)                                          |
| <i>SLC33A1</i>  | c-MAF_6688 (-428)                                                                |
| <i>SLC34A1</i>  | c-MAF_2072 (+5046)                                                               |
| <i>SLC35B1</i>  | c-MAF_6398 (-40946), c-MAF_4002 (-32120), c-MAF_3762 (-7579)                     |
| <i>SLC35C2</i>  | c-MAF_2488 (-38021)                                                              |
| <i>SLC35E1</i>  | c-MAF_3750 (-22436)                                                              |
| <i>SLC35F2</i>  | c-MAF_3227 (+11794)                                                              |
| <i>SLC35F5</i>  | c-MAF_4646 (-120130), c-MAF_1029 (-35178)                                        |
| <i>SLC35F6</i>  | c-MAF_2668 (+4948)                                                               |
| <i>SLC35G2</i>  | c-MAF_3117 (+20150)                                                              |
| <i>SLC35G3</i>  | c-MAF_2784 (-20016), c-MAF_3451 (+16769)                                         |
| <i>SLC35G5</i>  | c-MAF_6227 (+91174)                                                              |
| <i>SLC37A1</i>  | c-MAF_1660 (+14153)                                                              |
| <i>SLC37A3</i>  | c-MAF_5356 (+72169), c-MAF_203 (+145411), c-MAF_2638 (+183988)                   |
| <i>SLC37A4</i>  | c-MAF_3224 (+1269)                                                               |
| <i>SLC38A1</i>  | c-MAF_4391 (+1759)                                                               |
| <i>SLC38A2</i>  | c-MAF_4703 (-10231)                                                              |
| <i>SLC38A4</i>  | c-MAF_1957 (+160759)                                                             |
| <i>SLC38A6</i>  | c-MAF_1715 (-34833)                                                              |
| <i>SLC38A9</i>  | c-MAF_2486 (+192), c-MAF_4636 (+62194), c-MAF_201 (+122074), c-MAF_998 (+147686) |
| <i>SLC39A10</i> | c-MAF_2569 (-122417), c-MAF_3101 (-111956), c-MAF_356 (-92321)                   |
| <i>SLC39A8</i>  | c-MAF_3039 (-102462), c-MAF_1553 (-45645), c-MAF_5880 (-182)                     |
| <i>SLC3A1</i>   | c-MAF_1476 (-91115)                                                              |
| <i>SLC41A2</i>  | c-MAF_3892 (-29976)                                                              |

|                 |                                                                                                                                                                       |
|-----------------|-----------------------------------------------------------------------------------------------------------------------------------------------------------------------|
| <i>SLC44A1</i>  | c-MAF_6436 (-173290), c-MAF_5310 (-116561)                                                                                                                            |
| <i>SLC45A1</i>  | c-MAF_5131 (-184259), c-MAF_1231 (-34189), c-MAF_6446 (+105016)                                                                                                       |
| <i>SLC45A4</i>  | c-MAF_4707 (-10697), c-MAF_6422 (+98553)                                                                                                                              |
| <i>SLC46A3</i>  | c-MAF_6307 (+10917)                                                                                                                                                   |
| <i>SLC48A1</i>  | c-MAF_756 (+39745)                                                                                                                                                    |
| <i>SLC4A10</i>  | c-MAF_1410 (+84290)                                                                                                                                                   |
| <i>SLC4A1AP</i> | c-MAF_4146 (-25249)                                                                                                                                                   |
| <i>SLC4A5</i>   | c-MAF_6070 (+136945)                                                                                                                                                  |
| <i>SLC4A7</i>   | c-MAF_4006 (-172824), c-MAF_4850 (-118916), c-MAF_3468 (-87910), c-MAF_4668 (-64976)                                                                                  |
| <i>SLC4A8</i>   | c-MAF_2537 (-30477)                                                                                                                                                   |
| <i>SLC51A</i>   | c-MAF_2987 (+51899), c-MAF_1941 (+63056)                                                                                                                              |
| <i>SLC5A1</i>   | c-MAF_3776 (+95102)                                                                                                                                                   |
| <i>SLC5A3</i>   | c-MAF_2007 (+4525)                                                                                                                                                    |
| <i>SLC6A20</i>  | c-MAF_2758 (+23591), c-MAF_2946 (+105902)                                                                                                                             |
| <i>SLC6A3</i>   | c-MAF_5047 (-44043)                                                                                                                                                   |
| <i>SLC6A6</i>   | c-MAF_4979 (+29647)                                                                                                                                                   |
| <i>SLC7A10</i>  | c-MAF_1164 (-54855)                                                                                                                                                   |
| <i>SLC7A11</i>  | c-MAF_4622 (-143)                                                                                                                                                     |
| <i>SLC7A5</i>   | c-MAF_3943 (-26323), c-MAF_1025 (-5837), c-MAF_3636 (+1104)                                                                                                           |
| <i>SLC7A6</i>   | c-MAF_6655 (+6049), c-MAF_1837 (+17419)                                                                                                                               |
| <i>SLC7A6OS</i> | c-MAF_1837 (+28966), c-MAF_6655 (+40336)                                                                                                                              |
| <i>SLC7A8</i>   | c-MAF_2474 (+20697), c-MAF_893 (+22601)                                                                                                                               |
| <i>SLC9A3</i>   | c-MAF_5573 (+60157)                                                                                                                                                   |
| <i>SLC9A7</i>   | c-MAF_5332 (+35466), c-MAF_1988 (+130020), c-MAF_4531 (+171556)                                                                                                       |
| <i>SLC9A8</i>   | c-MAF_1112 (-36345)                                                                                                                                                   |
| <i>SLC9A9</i>   | c-MAF_4142 (-1514), c-MAF_2292 (+17256), c-MAF_1460 (+22802), c-MAF_5805 (+40340)                                                                                     |
| <i>SLC9B1</i>   | c-MAF_6558 (+129704)                                                                                                                                                  |
| <i>SLCO2B1</i>  | c-MAF_3000 (-50648), c-MAF_2359 (-47409), c-MAF_6004 (+2100)                                                                                                          |
| <i>SLCO3A1</i>  | c-MAF_3473 (+4260), c-MAF_4041 (+73526)                                                                                                                               |
| <i>SLCO4A1</i>  | c-MAF_521 (+10027)                                                                                                                                                    |
| <i>SLCO5A1</i>  | c-MAF_774 (-111278), c-MAF_5289 (-107590)                                                                                                                             |
| <i>SLFN11</i>   | c-MAF_1201 (+129112)                                                                                                                                                  |
| <i>SLFN12L</i>  | c-MAF_6340 (+462)                                                                                                                                                     |
| <i>SLFN13</i>   | c-MAF_2882 (+654)                                                                                                                                                     |
| <i>SLFN5</i>    | c-MAF_2784 (-28627), c-MAF_1201 (+1472)                                                                                                                               |
| <i>SLK</i>      | c-MAF_2740 (+16495)                                                                                                                                                   |
| <i>SLMO1</i>    | c-MAF_4580 (+136089)                                                                                                                                                  |
| <i>SLMO2</i>    | c-MAF_760 (-121128), c-MAF_2877 (-119130)                                                                                                                             |
| <i>SLN</i>      | c-MAF_3227 (-127701), c-MAF_4492 (+126852)                                                                                                                            |
| <i>SLTM</i>     | c-MAF_289 (-422)                                                                                                                                                      |
| <i>SLX1A</i>    | c-MAF_2402 (-7841)                                                                                                                                                    |
| <i>SLX4IP</i>   | c-MAF_3543 (+163637)                                                                                                                                                  |
| <i>SMAD2</i>    | c-MAF_4640 (+25450), c-MAF_5026 (+29381)                                                                                                                              |
| <i>SMAD3</i>    | c-MAF_5763 (-26083), c-MAF_3936 (+8532), c-MAF_5397 (+16637), c-MAF_4331 (+25680), c-MAF_1319 (+35499), c-MAF_3048 (+49470), c-MAF_1931 (+78921), c-MAF_5293 (+84633) |



|                 |                                                                                                                                                                                          |
|-----------------|------------------------------------------------------------------------------------------------------------------------------------------------------------------------------------------|
| <i>SMAD4</i>    | c-MAF_2476 (+23858), c-MAF_5858 (+141340)                                                                                                                                                |
| <i>SMAD7</i>    | c-MAF_20 (+81935), c-MAF_975 (+94579), c-MAF_180 (+117812), c-MAF_425 (+136694), c-MAF_6284 (+149109), c-MAF_5622 (+173187)                                                              |
| <i>SMAP1</i>    | c-MAF_4033 (+6028)                                                                                                                                                                       |
| <i>SMAP2</i>    | c-MAF_4263 (-31953)                                                                                                                                                                      |
| <i>SMARCA2</i>  | c-MAF_6149 (-142200), c-MAF_4019 (+4900), c-MAF_580 (+32143), c-MAF_5641 (+136471)                                                                                                       |
| <i>SMARCC1</i>  | c-MAF_5140 (+1163)                                                                                                                                                                       |
| <i>SMARCC2</i>  | c-MAF_6652 (+20107)                                                                                                                                                                      |
| <i>SMC3</i>     | c-MAF_1960 (-54788), c-MAF_1127 (-38670), c-MAF_4991 (-31457), c-MAF_2905 (+2155)                                                                                                        |
| <i>SMC5</i>     | c-MAF_6358 (+292), c-MAF_6050 (+152531)                                                                                                                                                  |
| <i>SMCHD1</i>   | c-MAF_2909 (-49991), c-MAF_2846 (-10964)                                                                                                                                                 |
| <i>SMCO1</i>    | c-MAF_1969 (-12618)                                                                                                                                                                      |
| <i>SMCO4</i>    | c-MAF_4724 (+13236), c-MAF_567 (+16124), c-MAF_4498 (+31208)                                                                                                                             |
| <i>SMG1</i>     | c-MAF_2881 (+72624)                                                                                                                                                                      |
| <i>SMG9</i>     | c-MAF_4967 (-21612), c-MAF_6460 (-10532)                                                                                                                                                 |
| <i>SMIM12</i>   | c-MAF_1150 (-3779)                                                                                                                                                                       |
| <i>SMIM18</i>   | c-MAF_3558 (-60937)                                                                                                                                                                      |
| <i>SMIM19</i>   | c-MAF_2436 (-126104)                                                                                                                                                                     |
| <i>SMIM2</i>    | c-MAF_6247 (-36802)                                                                                                                                                                      |
| <i>SMIM20</i>   | c-MAF_3485 (+24635), c-MAF_4873 (+106104), c-MAF_30 (+162240), c-MAF_805 (+179446)                                                                                                       |
| <i>SMIM3</i>    | c-MAF_2831 (+2999)                                                                                                                                                                       |
| <i>SMIM8</i>    | c-MAF_2656 (-140197)                                                                                                                                                                     |
| <i>SMIM9</i>    | c-MAF_2044 (+4814)                                                                                                                                                                       |
| <i>SMLR1</i>    | c-MAF_4326 (+58187)                                                                                                                                                                      |
| <i>SMNDC1</i>   | c-MAF_934 (-121246), c-MAF_3357 (-109927), c-MAF_2891 (-91057), c-MAF_2173 (-57039), c-MAF_45 (-51299), c-MAF_6151 (-6553), c-MAF_5292 (+1975), c-MAF_3962 (+82928), c-MAF_6645 (+93506) |
| <i>SMOX</i>     | c-MAF_855 (-17615), c-MAF_94 (+12359)                                                                                                                                                    |
| <i>SMPDL3A</i>  | c-MAF_2936 (+9129)                                                                                                                                                                       |
| <i>SMS</i>      | c-MAF_5742 (-7893), c-MAF_5634 (+48996)                                                                                                                                                  |
| <i>SMU1</i>     | c-MAF_3303 (-83338), c-MAF_4201 (-65947)                                                                                                                                                 |
| <i>SMURF2</i>   | c-MAF_4298 (+33940)                                                                                                                                                                      |
| <i>SMYD1</i>    | c-MAF_2878 (-14356)                                                                                                                                                                      |
| <i>SMYD2</i>    | c-MAF_5801 (+158395), c-MAF_5682 (+170479)                                                                                                                                               |
| <i>SMYD3</i>    | c-MAF_3154 (+30269), c-MAF_583 (+78450), c-MAF_2965 (+177143)                                                                                                                            |
| <i>SNAIL</i>    | c-MAF_3143 (+128593)                                                                                                                                                                     |
| <i>SNAP47</i>   | c-MAF_4929 (-4656), c-MAF_5529 (+52834)                                                                                                                                                  |
| <i>SND1</i>     | c-MAF_3326 (+162072)                                                                                                                                                                     |
| <i>SNPH</i>     | c-MAF_2182 (+60359)                                                                                                                                                                      |
| <i>SNRK</i>     | c-MAF_2446 (-106295), c-MAF_5090 (-52726), c-MAF_5558 (-42690)                                                                                                                           |
| <i>SNRNP200</i> | c-MAF_5974 (-12118), c-MAF_2554 (-10257)                                                                                                                                                 |
| <i>SNRNP35</i>  | c-MAF_1974 (-10944)                                                                                                                                                                      |
| <i>SNRPA</i>    | c-MAF_3501 (+5971)                                                                                                                                                                       |
| <i>SNRPB2</i>   | c-MAF_1033 (-20855)                                                                                                                                                                      |
| <i>SNRPD3</i>   | c-MAF_4572 (-44677)                                                                                                                                                                      |
| <i>SNTA1</i>    | c-MAF_3606 (-111346)                                                                                                                                                                     |
| <i>SNTB1</i>    | c-MAF_1726 (+10864), c-MAF_1769 (+32068), c-MAF_2456 (+81014)                                                                                                                            |

|                |                                                                                                                                                    |
|----------------|----------------------------------------------------------------------------------------------------------------------------------------------------|
| <i>SNTB2</i>   | c-MAF_2409 (-20537), c-MAF_444 (-7694), c-MAF_2941 (+1172)                                                                                         |
| <i>SNUPN</i>   | c-MAF_4741 (+27733)                                                                                                                                |
| <i>SNX11</i>   | c-MAF_2889 (+158458)                                                                                                                               |
| <i>SNX12</i>   | c-MAF_6419 (-277)                                                                                                                                  |
| <i>SNX13</i>   | c-MAF_4069 (+181)                                                                                                                                  |
| <i>SNX14</i>   | c-MAF_1667 (+129562)                                                                                                                               |
| <i>SNX16</i>   | c-MAF_3075 (-16777)                                                                                                                                |
| <i>SNX18</i>   | c-MAF_3372 (+128847)                                                                                                                               |
| <i>SNX2</i>    | c-MAF_5421 (-18539)                                                                                                                                |
| <i>SNX20</i>   | c-MAF_5557 (-2900)                                                                                                                                 |
| <i>SNX24</i>   | c-MAF_3323 (-142)                                                                                                                                  |
| <i>SNX31</i>   | c-MAF_586 (-69684), c-MAF_1552 (+25696)                                                                                                            |
| <i>SNX5</i>    | c-MAF_1213 (-23417)                                                                                                                                |
| <i>SNX6</i>    | c-MAF_956 (-36123), c-MAF_2624 (+16901)                                                                                                            |
| <i>SNX9</i>    | c-MAF_1383 (-67422), c-MAF_51 (-61883), c-MAF_5728 (+62107)                                                                                        |
| <i>SOAT2</i>   | c-MAF_4922 (-5032)                                                                                                                                 |
| <i>SOCS1</i>   | c-MAF_2890 (+3998), c-MAF_2174 (+22746), c-MAF_3896 (+31141), c-MAF_1402 (+80036), c-MAF_6430 (+84564), c-MAF_1463 (+155738), c-MAF_4693 (+161780) |
| <i>SOCS2</i>   | c-MAF_5094 (+1138)                                                                                                                                 |
| <i>SOCS4</i>   | c-MAF_6302 (+34)                                                                                                                                   |
| <i>SOCS6</i>   | c-MAF_6267 (-60252), c-MAF_5413 (+133507)                                                                                                          |
| <i>SOD1</i>    | c-MAF_5329 (-3335)                                                                                                                                 |
| <i>SOD2</i>    | c-MAF_3897 (-8451)                                                                                                                                 |
| <i>SOGA1</i>   | c-MAF_1789 (-83413)                                                                                                                                |
| <i>SON</i>     | c-MAF_3584 (+216)                                                                                                                                  |
| <i>SORBS3</i>  | c-MAF_5684 (-107845)                                                                                                                               |
| <i>SORD</i>    | c-MAF_876 (-140220)                                                                                                                                |
| <i>SORL1</i>   | c-MAF_5327 (-140620), c-MAF_3937 (+131756)                                                                                                         |
| <i>SOS1</i>    | c-MAF_1014 (-95975), c-MAF_2114 (-21176), c-MAF_1110 (-16054), c-MAF_1395 (-8122), c-MAF_5652 (+112111), c-MAF_4865 (+123087)                      |
| <i>SOS2</i>    | c-MAF_3991 (-2615)                                                                                                                                 |
| <i>SOX21</i>   | c-MAF_3124 (+44768)                                                                                                                                |
| <i>SOX30</i>   | c-MAF_2398 (-18518), c-MAF_5847 (+44504), c-MAF_3442 (+48781)                                                                                      |
| <i>SPI</i>     | c-MAF_6064 (-362)                                                                                                                                  |
| <i>SP100</i>   | c-MAF_2719 (-68464), c-MAF_4907 (+25338)                                                                                                           |
| <i>SP140L</i>  | c-MAF_2719 (+20618)                                                                                                                                |
| <i>SP4</i>     | c-MAF_5929 (-15358)                                                                                                                                |
| <i>SPACA1</i>  | c-MAF_4875 (-124632)                                                                                                                               |
| <i>SPAG1</i>   | c-MAF_2966 (+60726)                                                                                                                                |
| <i>SPAG5</i>   | c-MAF_787 (+28)                                                                                                                                    |
| <i>SPAG6</i>   | c-MAF_5779 (+91742)                                                                                                                                |
| <i>SPAG7</i>   | c-MAF_3294 (-1625)                                                                                                                                 |
| <i>SPARC</i>   | c-MAF_6296 (-62597)                                                                                                                                |
| <i>SPATA13</i> | c-MAF_5691 (+117577)                                                                                                                               |
| <i>SPATA17</i> | c-MAF_4708 (-247), c-MAF_4025 (+29635)                                                                                                             |
| <i>SPATA21</i> | c-MAF_5648 (+68920)                                                                                                                                |

|                |                                                                                                         |
|----------------|---------------------------------------------------------------------------------------------------------|
| <i>SPATA24</i> | c-MAF_3702 (-33376), c-MAF_603 (-11846), c-MAF_1162 (-182)                                              |
| <i>SPATA25</i> | c-MAF_3239 (+2469)                                                                                      |
| <i>SPATA3</i>  | c-MAF_4602 (-38925), c-MAF_2302 (-15384), c-MAF_5388 (-10196)                                           |
| <i>SPATA32</i> | c-MAF_3012 (-50165), c-MAF_927 (-15451), c-MAF_2815 (+35886)                                            |
| <i>SPATS2L</i> | c-MAF_5877 (-66684), c-MAF_2171 (+149972), c-MAF_3583 (+173845)                                         |
| <i>SPC24</i>   | c-MAF_6359 (-24318), c-MAF_2497 (+60630)                                                                |
| <i>SPDEF</i>   | c-MAF_4702 (-108230), c-MAF_4774 (-100310)                                                              |
| <i>SPECCI1</i> | c-MAF_6155 (+68747)                                                                                     |
| <i>SPEN</i>    | c-MAF_1569 (-12072), c-MAF_5960 (+2283), c-MAF_648 (+101575), c-MAF_952 (+117622), c-MAF_4159 (+127216) |
| <i>SPG11</i>   | c-MAF_4679 (+715), c-MAF_4920 (+117209)                                                                 |
| <i>SPG20</i>   | c-MAF_2450 (-71476)                                                                                     |
| <i>SPHAR</i>   | c-MAF_746 (-17873), c-MAF_3918 (+36304)                                                                 |
| <i>SPHK1</i>   | c-MAF_785 (-12280)                                                                                      |
| <i>SPII</i>    | c-MAF_6633 (+8646)                                                                                      |
| <i>SPINI</i>   | c-MAF_6301 (-84186)                                                                                     |
| <i>SPINK14</i> | c-MAF_1625 (+16766)                                                                                     |
| <i>SPINK2</i>  | c-MAF_4172 (+58768)                                                                                     |
| <i>SPINK6</i>  | c-MAF_1625 (-16342)                                                                                     |
| <i>SPIRE1</i>  | c-MAF_4689 (+4927), c-MAF_4580 (+114149)                                                                |
| <i>SPOCD1</i>  | c-MAF_1919 (-120799)                                                                                    |
| <i>SPOCK2</i>  | c-MAF_3137 (-20759), c-MAF_6053 (+114043)                                                               |
| <i>SPON2</i>   | c-MAF_3059 (-29318)                                                                                     |
| <i>SPP2</i>    | c-MAF_6621 (-18032)                                                                                     |
| <i>SPPL2A</i>  | c-MAF_861 (+1303)                                                                                       |
| <i>SPPL2C</i>  | c-MAF_3582 (+29079)                                                                                     |
| <i>SPPL3</i>   | c-MAF_6474 (+83254)                                                                                     |
| <i>SPRED1</i>  | c-MAF_4180 (-179862), c-MAF_2582 (-167026), c-MAF_4840 (-160766), c-MAF_4195 (-121962)                  |
| <i>SPRED2</i>  | c-MAF_2403 (+111849), c-MAF_3617 (+131018)                                                              |
| <i>SPRTN</i>   | c-MAF_948 (-380)                                                                                        |
| <i>SPRY1</i>   | c-MAF_5027 (-2532), c-MAF_918 (+16795), c-MAF_400 (+22290), c-MAF_2354 (+45069)                         |
| <i>SPRY4</i>   | c-MAF_525 (-147610), c-MAF_3016 (-101408)                                                               |
| <i>SPRYD4</i>  | c-MAF_4412 (-152)                                                                                       |
| <i>SPSB1</i>   | c-MAF_5422 (-2833), c-MAF_1884 (+22946), c-MAF_3512 (+120381), c-MAF_6290 (+133660)                     |
| <i>SPTB</i>    | c-MAF_6625 (+96230)                                                                                     |
| <i>SPTBN1</i>  | c-MAF_2254 (+116245)                                                                                    |
| <i>SPTBN4</i>  | c-MAF_6412 (+57352)                                                                                     |
| <i>SPTBN5</i>  | c-MAF_4805 (-77451), c-MAF_752 (-42645)                                                                 |
| <i>SPTY2D1</i> | c-MAF_405 (+16307)                                                                                      |
| <i>SQLE</i>    | c-MAF_6666 (+251)                                                                                       |
| <i>SQRDL</i>   | c-MAF_6357 (+14283)                                                                                     |
| <i>SRBD1</i>   | c-MAF_2922 (+56362)                                                                                     |
| <i>SRCIN1</i>  | c-MAF_2373 (-71452)                                                                                     |
| <i>SREBF2</i>  | c-MAF_3708 (-5151), c-MAF_447 (+26287), c-MAF_1200 (+40333)                                             |
| <i>SREK1</i>   | c-MAF_4524 (-141553)                                                                                    |

|                   |                                                                                                                          |
|-------------------|--------------------------------------------------------------------------------------------------------------------------|
| <i>SRGAP2</i>     | c-MAF_5535 (+99478), c-MAF_105 (+114353)                                                                                 |
| <i>SRGN</i>       | c-MAF_887 (-42358), c-MAF_2959 (-39778), c-MAF_3156 (-32627), c-MAF_2636 (-24670), c-MAF_2163 (-273)                     |
| <i>SRI</i>        | c-MAF_3173 (+73), c-MAF_6440 (+34995)                                                                                    |
| <i>SRM</i>        | c-MAF_1571 (-3102)                                                                                                       |
| <i>SRP14</i>      | c-MAF_4173 (-8729)                                                                                                       |
| <i>SRP54</i>      | c-MAF_2669 (-1009)                                                                                                       |
| <i>SRP68</i>      | c-MAF_4787 (+917)                                                                                                        |
| <i>SRPK1</i>      | c-MAF_830 (-52482), c-MAF_3366 (+109968)                                                                                 |
| <i>SRPX</i>       | c-MAF_5837 (+117708), c-MAF_3913 (+124738), c-MAF_4205 (+168672), c-MAF_6293 (+182131)                                   |
| <i>SRR</i>        | c-MAF_3594 (-110814), c-MAF_5913 (-107686), c-MAF_5754 (-49619), c-MAF_1678 (-37576)                                     |
| <i>SRSF11</i>     | c-MAF_4029 (-49039), c-MAF_5756 (+42759)                                                                                 |
| <i>SRSF5</i>      | c-MAF_2242 (-101335), c-MAF_6395 (-90533), c-MAF_381 (-51814), c-MAF_406 (-41426), c-MAF_4328 (-10165)                   |
| <i>SRSF7</i>      | c-MAF_5536 (+317), c-MAF_3787 (+28811), c-MAF_5009 (+41907), c-MAF_70 (+84301)                                           |
| <i>SSH1</i>       | c-MAF_1631 (+18915)                                                                                                      |
| <i>SSH2</i>       | c-MAF_5483 (+168993)                                                                                                     |
| <i>SSPN</i>       | c-MAF_4451 (+79375), c-MAF_6386 (+151339)                                                                                |
| <i>SSR1</i>       | c-MAF_6157 (+124447)                                                                                                     |
| <i>SSR3</i>       | c-MAF_5554 (-109751), c-MAF_4193 (+987), c-MAF_2942 (+71682)                                                             |
| <i>SSTR3</i>      | c-MAF_6619 (-10521)                                                                                                      |
| <i>SSX2IP</i>     | c-MAF_5665 (+70698)                                                                                                      |
| <i>ST14</i>       | c-MAF_5031 (+3277)                                                                                                       |
| <i>ST20-MTHFS</i> | c-MAF_1078 (-44065)                                                                                                      |
| <i>ST3GAL1</i>    | c-MAF_5789 (-1016), c-MAF_100 (+3159), c-MAF_3421 (+7354), c-MAF_1117 (+45146), c-MAF_2039 (+51313), c-MAF_2200 (+72561) |
| <i>ST3GAL3</i>    | c-MAF_1082 (+158137)                                                                                                     |
| <i>ST3GAL4</i>    | c-MAF_2548 (-52236)                                                                                                      |
| <i>ST3GAL5</i>    | c-MAF_2679 (-105061), c-MAF_3222 (+21651)                                                                                |
| <i>ST6GAL1</i>    | c-MAF_2621 (-58833), c-MAF_6376 (+1450), c-MAF_6546 (+95040)                                                             |
| <i>ST6GALNAC4</i> | c-MAF_2567 (-12157), c-MAF_3462 (-2649)                                                                                  |
| <i>ST7</i>        | c-MAF_4513 (+57172), c-MAF_4222 (+171621)                                                                                |
| <i>ST8SIA2</i>    | c-MAF_5337 (+134116)                                                                                                     |
| <i>ST8SIA4</i>    | c-MAF_3182 (+1237), c-MAF_5172 (+12647), c-MAF_5829 (+74931), c-MAF_3347 (+171272)                                       |
| <i>STAB1</i>      | c-MAF_1353 (-4385)                                                                                                       |
| <i>STAC2</i>      | c-MAF_6335 (-164179)                                                                                                     |
| <i>STAG2</i>      | c-MAF_5461 (-98716), c-MAF_3628 (+2631)                                                                                  |
| <i>STAG3</i>      | c-MAF_6548 (+31580)                                                                                                      |
| <i>STAM2</i>      | c-MAF_4465 (+41087)                                                                                                      |
| <i>STAMBP</i>     | c-MAF_3188 (+2217)                                                                                                       |
| <i>STAP1</i>      | c-MAF_3505 (+126700)                                                                                                     |
| <i>STARD3NL</i>   | c-MAF_1814 (+54898)                                                                                                      |
| <i>STARD5</i>     | c-MAF_6631 (+30031)                                                                                                      |
| <i>STARD7</i>     | c-MAF_5800 (+1195), c-MAF_3358 (+50817)                                                                                  |
| <i>STAT1</i>      | c-MAF_451 (-101345), c-MAF_2851 (-89719), c-MAF_4207 (-24331)                                                            |
| <i>STAT2</i>      | c-MAF_2999 (-279)                                                                                                        |
| <i>STAT3</i>      | c-MAF_1582 (+50916)                                                                                                      |

|                      |                                                                                                                              |
|----------------------|------------------------------------------------------------------------------------------------------------------------------|
| <i>STAT4</i>         | c-MAF_1058 (-1747), c-MAF_451 (+35665), c-MAF_2851 (+47291), c-MAF_4207 (+112679)                                            |
| <i>STAT5A</i>        | c-MAF_1582 (+50105)                                                                                                          |
| <i>STAT5B</i>        | c-MAF_1723 (+6825)                                                                                                           |
| <i>STAT6</i>         | c-MAF_5448 (-879)                                                                                                            |
| <i>STAU1</i>         | c-MAF_6363 (+20723)                                                                                                          |
| <i>STAU2</i>         | c-MAF_6691 (-381)                                                                                                            |
| <i>STC1</i>          | c-MAF_4635 (+71306)                                                                                                          |
| <i>STEAP1B</i>       | c-MAF_5676 (-64907)                                                                                                          |
| <i>STH</i>           | c-MAF_6289 (+180284)                                                                                                         |
| <i>STIM1</i>         | c-MAF_4384 (-1163), c-MAF_1497 (+99511)                                                                                      |
| <i>STIM2</i>         | c-MAF_3363 (-424)                                                                                                            |
| <i>STK10</i>         | c-MAF_3060 (+75115)                                                                                                          |
| <i>STK11</i>         | c-MAF_4231 (-13299)                                                                                                          |
| <i>STK17A</i>        | c-MAF_1967 (-10438)                                                                                                          |
| <i>STK17B</i>        | c-MAF_2723 (-104379), c-MAF_4588 (-91809), c-MAF_711 (-70952), c-MAF_1394 (-63283), c-MAF_4601 (-58827), c-MAF_3923 (-23947) |
| <i>STK24</i>         | c-MAF_4026 (-49076), c-MAF_4910 (+37049), c-MAF_6492 (+45433)                                                                |
| <i>STK25</i>         | c-MAF_628 (+64734)                                                                                                           |
| <i>STK31</i>         | c-MAF_1859 (+184656)                                                                                                         |
| <i>STK32C</i>        | c-MAF_3829 (-12442)                                                                                                          |
| <i>STK38L</i>        | c-MAF_1271 (-67245), c-MAF_1079 (-64300), c-MAF_1916 (-58398)                                                                |
| <i>STK39</i>         | c-MAF_2591 (+36840), c-MAF_2056 (+53107)                                                                                     |
| <i>STK4</i>          | c-MAF_6394 (+3967)                                                                                                           |
| <i>STK40</i>         | c-MAF_5008 (+11778)                                                                                                          |
| <i>STOM</i>          | c-MAF_3193 (+16342)                                                                                                          |
| <i>STON1</i>         | c-MAF_1438 (-6743)                                                                                                           |
| <i>STON1-GTF2A1L</i> | c-MAF_427 (-346), c-MAF_1438 (+4861)                                                                                         |
| <i>STON2</i>         | c-MAF_32 (+25890), c-MAF_5339 (+36570)                                                                                       |
| <i>STPG1</i>         | c-MAF_1918 (+28581)                                                                                                          |
| <i>STRBP</i>         | c-MAF_3706 (-70750), c-MAF_1289 (+43058)                                                                                     |
| <i>STRIP2</i>        | c-MAF_6391 (-89893), c-MAF_3343 (+59877), c-MAF_3409 (+96542)                                                                |
| <i>STRN</i>          | c-MAF_5110 (+165809)                                                                                                         |
| <i>STX10</i>         | c-MAF_2020 (+17575)                                                                                                          |
| <i>STX11</i>         | c-MAF_3107 (-18983), c-MAF_5906 (+65727)                                                                                     |
| <i>STX1A</i>         | c-MAF_1698 (+1590), c-MAF_2175 (+3876)                                                                                       |
| <i>STX3</i>          | c-MAF_5889 (+14224)                                                                                                          |
| <i>STX8</i>          | c-MAF_497 (+105920), c-MAF_1904 (+143615)                                                                                    |
| <i>STXBP5</i>        | c-MAF_4804 (-9345)                                                                                                           |
| <i>STYK1</i>         | c-MAF_5900 (+68)                                                                                                             |
| <i>STYXL1</i>        | c-MAF_1874 (+39644)                                                                                                          |
| <i>SUB1</i>          | c-MAF_5496 (-122617), c-MAF_4940 (-53515), c-MAF_160 (-42583)                                                                |
| <i>SUCLG2</i>        | c-MAF_1832 (-1329)                                                                                                           |
| <i>SUCO</i>          | c-MAF_6142 (-644), c-MAF_1181 (+106171), c-MAF_3730 (+110568)                                                                |
| <i>SUFU</i>          | c-MAF_755 (+1031), c-MAF_5144 (+129012)                                                                                      |
| <i>SULT6B1</i>       | c-MAF_4261 (-13443)                                                                                                          |

|                |                                                                                                                             |
|----------------|-----------------------------------------------------------------------------------------------------------------------------|
| <i>SUMF1</i>   | c-MAF_4730 (+56863), c-MAF_4749 (+65546), c-MAF_6166 (+73111), c-MAF_5581 (+115642)                                         |
| <i>SUMO4</i>   | c-MAF_5224 (-75717), c-MAF_4597 (+23453), c-MAF_2900 (+71616)                                                               |
| <i>SUN5</i>    | c-MAF_5502 (+32038), c-MAF_5997 (+37173)                                                                                    |
| <i>SUPT16H</i> | c-MAF_5386 (+66)                                                                                                            |
| <i>SUPT3H</i>  | c-MAF_5797 (-76489), c-MAF_3663 (+26022)                                                                                    |
| <i>SUPT4H1</i> | c-MAF_411 (+7621)                                                                                                           |
| <i>SUPT7L</i>  | c-MAF_4828 (-42189)                                                                                                         |
| <i>SUPV3L1</i> | c-MAF_2130 (-50994), c-MAF_1130 (+34857)                                                                                    |
| <i>SUSD1</i>   | c-MAF_6390 (-43792), c-MAF_2906 (-5039), c-MAF_5395 (+830)                                                                  |
| <i>SUSD3</i>   | c-MAF_5908 (-94281), c-MAF_3722 (+23433)                                                                                    |
| <i>SV2B</i>    | c-MAF_2666 (-52633)                                                                                                         |
| <i>SVIL</i>    | c-MAF_2138 (+76635)                                                                                                         |
| <i>SVOPL</i>   | c-MAF_1453 (+11341)                                                                                                         |
| <i>SWAP70</i>  | c-MAF_4257 (-1603)                                                                                                          |
| <i>SYCE3</i>   | c-MAF_3631 (+23236)                                                                                                         |
| <i>SYCP3</i>   | c-MAF_3115 (-53979)                                                                                                         |
| <i>SYDE2</i>   | c-MAF_6540 (+52253)                                                                                                         |
| <i>SYK</i>     | c-MAF_5730 (+133571), c-MAF_2861 (+141869), c-MAF_6349 (+164595)                                                            |
| <i>SYNE2</i>   | c-MAF_6750 (-92950), c-MAF_3430 (+11562)                                                                                    |
| <i>SYNE3</i>   | c-MAF_1223 (-42717), c-MAF_1675 (-27715), c-MAF_2984 (-4528)                                                                |
| <i>SYNGAP1</i> | c-MAF_6610 (+9742)                                                                                                          |
| <i>SYNGR2</i>  | c-MAF_18 (-13385), c-MAF_1043 (-8757)                                                                                       |
| <i>SYNJI</i>   | c-MAF_1010 (+850)                                                                                                           |
| <i>SYNJ2</i>   | c-MAF_5728 (-96516), c-MAF_905 (+44869), c-MAF_5699 (+58577), c-MAF_5540 (+71577)                                           |
| <i>SYS1</i>    | c-MAF_668 (-8222), c-MAF_6661 (-5548)                                                                                       |
| <i>SYT11</i>   | c-MAF_2879 (+525)                                                                                                           |
| <i>SYT17</i>   | c-MAF_2988 (-40969)                                                                                                         |
| <i>SYT2</i>    | c-MAF_2611 (+77315)                                                                                                         |
| <i>SYTL2</i>   | c-MAF_6473 (-148235), c-MAF_3686 (-101882), c-MAF_4567 (-97550), c-MAF_4606 (-26578)                                        |
| <i>SYTL3</i>   | c-MAF_5230 (-11538), c-MAF_540 (-7610), c-MAF_4867 (+25798), c-MAF_4273 (+142631)                                           |
| <i>SYTL5</i>   | c-MAF_3268 (-25160), c-MAF_6293 (+5234), c-MAF_4205 (+18693), c-MAF_3913 (+62627), c-MAF_5837 (+69657)                      |
| <i>TAB2</i>    | c-MAF_4902 (-179940), c-MAF_323 (-166627), c-MAF_623 (-109706), c-MAF_229 (-87572), c-MAF_5224 (+3590)                      |
| <i>TAB3</i>    | c-MAF_690 (+153869)                                                                                                         |
| <i>TACCC1</i>  | c-MAF_5551 (-16890), c-MAF_2108 (+20751)                                                                                    |
| <i>TACR2</i>   | c-MAF_3751 (+57536)                                                                                                         |
| <i>TADA1</i>   | c-MAF_4718 (-34404), c-MAF_3676 (+27917)                                                                                    |
| <i>TADA2A</i>  | c-MAF_1758 (+33776), c-MAF_4051 (+55005), c-MAF_2303 (+82042)                                                               |
| <i>TADA2B</i>  | c-MAF_1099 (-117745), c-MAF_1464 (-100959)                                                                                  |
| <i>TADA3</i>   | c-MAF_1362 (+12712)                                                                                                         |
| <i>TAF10</i>   | c-MAF_5868 (-5415)                                                                                                          |
| <i>TAF1A</i>   | c-MAF_4881 (-231)                                                                                                           |
| <i>TAF1B</i>   | c-MAF_6365 (-179619), c-MAF_4518 (-143510), c-MAF_2032 (-88846), c-MAF_394 (-79608), c-MAF_4176 (-60890), c-MAF_6389 (+232) |
| <i>TAF8</i>    | c-MAF_5307 (-91761), c-MAF_5071 (-88654), c-MAF_3082 (-82436), c-MAF_5106 (-28260), c-MAF_4655 (+49338)                     |
| <i>TAF9B</i>   | c-MAF_3299 (+33305)                                                                                                         |

|                 |                                                                                                                              |
|-----------------|------------------------------------------------------------------------------------------------------------------------------|
| <i>TAGAP</i>    | c-MAF_3575 (-53799), c-MAF_1929 (+5626), c-MAF_6262 (+27142), c-MAF_1717 (+49673), c-MAF_2479 (+175013)                      |
| <i>TAGLN3</i>   | c-MAF_4475 (+14951)                                                                                                          |
| <i>TANK</i>     | c-MAF_5670 (-82614)                                                                                                          |
| <i>TAOK3</i>    | c-MAF_608 (+65821)                                                                                                           |
| <i>TAPI</i>     | c-MAF_6535 (+81)                                                                                                             |
| <i>TARBP1</i>   | c-MAF_2102 (-129167)                                                                                                         |
| <i>TARBP2</i>   | c-MAF_5222 (+431)                                                                                                            |
| <i>TARS2</i>    | c-MAF_5701 (-100690)                                                                                                         |
| <i>TATDN2</i>   | c-MAF_2733 (-55844), c-MAF_1415 (-19295), c-MAF_295 (-5369)                                                                  |
| <i>TATDN3</i>   | c-MAF_6150 (+2930)                                                                                                           |
| <i>TAX1BP1</i>  | c-MAF_5620 (+880)                                                                                                            |
| <i>TBC1D13</i>  | c-MAF_4585 (-3502)                                                                                                           |
| <i>TBC1D14</i>  | c-MAF_1099 (+15801), c-MAF_1464 (+32587)                                                                                     |
| <i>TBC1D20</i>  | c-MAF_1975 (+28822)                                                                                                          |
| <i>TBC1D21</i>  | c-MAF_716 (-176453)                                                                                                          |
| <i>TBC1D22A</i> | c-MAF_3186 (+8318), c-MAF_3134 (+28887)                                                                                      |
| <i>TBC1D25</i>  | c-MAF_6443 (+2163)                                                                                                           |
| <i>TBC1D2B</i>  | c-MAF_3377 (+30826)                                                                                                          |
| <i>TBC1D31</i>  | c-MAF_1386 (-14578), c-MAF_2543 (+11605), c-MAF_4296 (+23796), c-MAF_3437 (+40176), c-MAF_1437 (+76527), c-MAF_4151 (+94448) |
| <i>TBC1D4</i>   | c-MAF_4385 (+126485)                                                                                                         |
| <i>TBC1D5</i>   | c-MAF_3932 (-42414), c-MAF_1741 (-33438), c-MAF_3749 (+67360)                                                                |
| <i>TBC1D7</i>   | c-MAF_3093 (-127888), c-MAF_739 (-101524), c-MAF_1852 (+52812)                                                               |
| <i>TBCA</i>     | c-MAF_4362 (+581)                                                                                                            |
| <i>TBCC</i>     | c-MAF_5511 (-67335), c-MAF_2365 (-24968), c-MAF_5848 (-880)                                                                  |
| <i>TBK1</i>     | c-MAF_1828 (+26961)                                                                                                          |
| <i>TBKBP1</i>   | c-MAF_6360 (-24961), c-MAF_611 (+10348), c-MAF_1980 (+26152)                                                                 |
| <i>TBLIX</i>    | c-MAF_4167 (-146695), c-MAF_1529 (-112389), c-MAF_2406 (-8237), c-MAF_3373 (-1808)                                           |
| <i>TBLIXR1</i>  | c-MAF_284 (-162403), c-MAF_5064 (-149309), c-MAF_4540 (-5478)                                                                |
| <i>TBL3</i>     | c-MAF_3447 (-280)                                                                                                            |
| <i>TBP</i>      | c-MAF_6444 (-826)                                                                                                            |
| <i>TBX19</i>    | c-MAF_1195 (-43670), c-MAF_532 (+82242), c-MAF_5700 (+135332), c-MAF_4511 (+140374)                                          |
| <i>TBX21</i>    | c-MAF_611 (-27632), c-MAF_1980 (-11828)                                                                                      |
| <i>TBXAS1</i>   | c-MAF_6049 (+92), c-MAF_382 (+26479), c-MAF_4941 (+87132), c-MAF_4603 (+151758)                                              |
| <i>TC2N</i>     | c-MAF_2061 (+40)                                                                                                             |
| <i>TCAIM</i>    | c-MAF_4417 (+101354)                                                                                                         |
| <i>TCEANC</i>   | c-MAF_947 (+8920)                                                                                                            |
| <i>TCEANC2</i>  | c-MAF_6375 (+25690)                                                                                                          |
| <i>TCEB1</i>    | c-MAF_5821 (-3530)                                                                                                           |
| <i>TCEB3</i>    | c-MAF_1097 (+36928), c-MAF_361 (+41889)                                                                                      |
| <i>TCF12</i>    | c-MAF_6163 (-151074), c-MAF_3397 (-131454), c-MAF_2241 (+67831)                                                              |
| <i>TCF20</i>    | c-MAF_2329 (-28381), c-MAF_2156 (+34982), c-MAF_1651 (+41134)                                                                |
| <i>TCF7</i>     | c-MAF_3467 (+18038), c-MAF_2202 (+23855)                                                                                     |
| <i>TCF7L2</i>   | c-MAF_2013 (+144067)                                                                                                         |
| <i>TCFL5</i>    | c-MAF_5708 (-59592)                                                                                                          |

|                       |                                                                                                                                                 |
|-----------------------|-------------------------------------------------------------------------------------------------------------------------------------------------|
| <i>TCHHL1</i>         | c-MAF_3221 (+39068)                                                                                                                             |
| <i>TCN1</i>           | c-MAF_488 (+1311), c-MAF_1067 (+8329)                                                                                                           |
| <i>TCN2</i>           | c-MAF_5657 (+131)                                                                                                                               |
| <i>TCPI10</i>         | c-MAF_6238 (+33160)                                                                                                                             |
| <i>TCPI11</i>         | c-MAF_4486 (+92850)                                                                                                                             |
| <i>TCTEXID4</i>       | c-MAF_621 (-2549)                                                                                                                               |
| <i>TCTN1</i>          | c-MAF_3568 (+5452)                                                                                                                              |
| <i>TDGFI1</i>         | c-MAF_4958 (-60060), c-MAF_5161 (+52910)                                                                                                        |
| <i>TDPI1</i>          | c-MAF_4186 (+4214)                                                                                                                              |
| <i>TDRD1</i>          | c-MAF_4476 (-4405)                                                                                                                              |
| <i>TDRD10</i>         | c-MAF_2052 (-95483), c-MAF_3194 (-71181), c-MAF_6270 (-63212), c-MAF_4275 (-36547)                                                              |
| <i>TDRD7</i>          | c-MAF_4796 (-14521)                                                                                                                             |
| <i>TEAD1</i>          | c-MAF_5029 (+69967)                                                                                                                             |
| <i>TEF</i>            | c-MAF_968 (+22067), c-MAF_2739 (+43887)                                                                                                         |
| <i>TENM4</i>          | c-MAF_1604 (+135703)                                                                                                                            |
| <i>TEPI1</i>          | c-MAF_2069 (+12243)                                                                                                                             |
| <i>TESC</i>           | c-MAF_2986 (+139085)                                                                                                                            |
| <i>TESK1</i>          | c-MAF_4351 (-34398)                                                                                                                             |
| <i>TET2</i>           | c-MAF_1482 (+45636), c-MAF_5188 (+69486), c-MAF_118 (+160029)                                                                                   |
| <i>TET3</i>           | c-MAF_732 (-113940)                                                                                                                             |
| <i>TEX29</i>          | c-MAF_4260 (-143373), c-MAF_3701 (-131391), c-MAF_827 (-24008), c-MAF_3242 (-16315)                                                             |
| <i>TEX37</i>          | c-MAF_2197 (+75485)                                                                                                                             |
| <i>TFB1M</i>          | c-MAF_5863 (-103942)                                                                                                                            |
| <i>TFF3</i>           | c-MAF_4240 (+78730), c-MAF_1970 (+81103)                                                                                                        |
| <i>TFIP11</i>         | c-MAF_630 (-34536), c-MAF_1983 (-22734)                                                                                                         |
| <i>TFRC</i>           | c-MAF_3168 (-97600), c-MAF_4667 (-11508)                                                                                                        |
| <i>TG</i>             | c-MAF_5839 (-67372), c-MAF_754 (+51400), c-MAF_4073 (+112404)                                                                                   |
| <i>TGFB1</i>          | c-MAF_1136 (+26097)                                                                                                                             |
| <i>TGFB2</i>          | c-MAF_2421 (+31383)                                                                                                                             |
| <i>TGFB3</i>          | c-MAF_2736 (+102000)                                                                                                                            |
| <i>TGFBR1</i>         | c-MAF_864 (-51961), c-MAF_1505 (-47932)                                                                                                         |
| <i>TGFBR2</i>         | c-MAF_3656 (+5303), c-MAF_5330 (+10178), c-MAF_733 (+13909), c-MAF_4294 (+24906), c-MAF_4036 (+33545), c-MAF_4752 (+38233), c-MAF_5428 (+48829) |
| <i>TGFBR3</i>         | c-MAF_4278 (+133682), c-MAF_5596 (+151287), c-MAF_5820 (+172523)                                                                                |
| <i>TGIF1</i>          | c-MAF_3657 (-146136), c-MAF_218 (+2324), c-MAF_455 (+144120), c-MAF_3461 (+153068), c-MAF_6591 (+175212)                                        |
| <i>TGIF2-C20orf24</i> | c-MAF_852 (+7945)                                                                                                                               |
| <i>TGOLN2</i>         | c-MAF_5608 (+1322)                                                                                                                              |
| <i>TH</i>             | c-MAF_4665 (-97406)                                                                                                                             |
| <i>THAP6</i>          | c-MAF_2857 (-2092)                                                                                                                              |
| <i>THBS1</i>          | c-MAF_4905 (+43936)                                                                                                                             |
| <i>THBS4</i>          | c-MAF_2969 (+105108)                                                                                                                            |
| <i>THEM4</i>          | c-MAF_4196 (+11032)                                                                                                                             |
| <i>THEM5</i>          | c-MAF_4196 (-45079)                                                                                                                             |
| <i>THEMIS</i>         | c-MAF_3483 (-71092), c-MAF_2422 (-37858), c-MAF_2692 (-404)                                                                                     |
| <i>THEMIS2</i>        | c-MAF_5412 (+19117), c-MAF_3495 (+40007)                                                                                                        |



|                |                                                                                     |
|----------------|-------------------------------------------------------------------------------------|
| <i>THG1L</i>   | c-MAF_2398 (-60259)                                                                 |
| <i>THOC1</i>   | c-MAF_3203 (-231)                                                                   |
| <i>THOC2</i>   | c-MAF_2057 (-103088), c-MAF_4017 (+142041)                                          |
| <i>THRAP3</i>  | c-MAF_5200 (+734)                                                                   |
| <i>THRB</i>    | c-MAF_2821 (-183809)                                                                |
| <i>THRSF</i>   | c-MAF_2673 (-23855)                                                                 |
| <i>THSD1</i>   | c-MAF_1166 (+60828)                                                                 |
| <i>THUMPD2</i> | c-MAF_3472 (-168948), c-MAF_5683 (-159396)                                          |
| <i>THUMPD3</i> | c-MAF_2590 (+221)                                                                   |
| <i>TIA1</i>    | c-MAF_2803 (+106182), c-MAF_1673 (+115748)                                          |
| <i>TIAF1</i>   | c-MAF_1890 (-60750)                                                                 |
| <i>TIAL1</i>   | c-MAF_3963 (-46211)                                                                 |
| <i>TICAM1</i>  | c-MAF_6434 (+18624)                                                                 |
| <i>TIGD2</i>   | c-MAF_4954 (+130949)                                                                |
| <i>TIGD5</i>   | c-MAF_6437 (+10632)                                                                 |
| <i>TIGD6</i>   | c-MAF_5871 (-66057), c-MAF_5884 (-6073)                                             |
| <i>TIGIT</i>   | c-MAF_6032 (-4649), c-MAF_5039 (+42080)                                             |
| <i>TIMD4</i>   | c-MAF_3204 (-62249), c-MAF_2419 (+42616)                                            |
| <i>TIMM22</i>  | c-MAF_6086 (+2514)                                                                  |
| <i>TIMMDC1</i> | c-MAF_2034 (+9900), c-MAF_2510 (+43271)                                             |
| <i>TIMP1</i>   | c-MAF_4906 (-18191), c-MAF_5400 (-2686)                                             |
| <i>TIMP4</i>   | c-MAF_54 (-34357), c-MAF_2308 (-28316)                                              |
| <i>TINAGL1</i> | c-MAF_5923 (-12241)                                                                 |
| <i>TINF2</i>   | c-MAF_5771 (-144)                                                                   |
| <i>TIPARP</i>  | c-MAF_5554 (-9910), c-MAF_3516 (+2379), c-MAF_5603 (+142523)                        |
| <i>TIRAP</i>   | c-MAF_4985 (+1845)                                                                  |
| <i>TJP1</i>    | c-MAF_5141 (-2907)                                                                  |
| <i>TJP2</i>    | c-MAF_969 (-160080), c-MAF_317 (-36079)                                             |
| <i>TK2</i>     | c-MAF_2763 (+10495), c-MAF_2755 (+28062), c-MAF_6649 (+92226)                       |
| <i>TKTL1</i>   | c-MAF_5757 (+17719)                                                                 |
| <i>TLCD2</i>   | c-MAF_2311 (-6915)                                                                  |
| <i>TLDC1</i>   | c-MAF_1050 (-95073), c-MAF_1257 (-90548), c-MAF_2925 (+26331)                       |
| <i>TLE4</i>    | c-MAF_5530 (+12368), c-MAF_6623 (+52664)                                            |
| <i>TLK1</i>    | c-MAF_3279 (-87567), c-MAF_2584 (-2641)                                             |
| <i>TLL1</i>    | c-MAF_1462 (+172522)                                                                |
| <i>TLN2</i>    | c-MAF_3796 (+88640), c-MAF_5592 (+150869)                                           |
| <i>TLR8</i>    | c-MAF_4592 (+54457)                                                                 |
| <i>TM2D2</i>   | c-MAF_1358 (+18)                                                                    |
| <i>TM4SF20</i> | c-MAF_828 (-81037), c-MAF_2091 (-36436), c-MAF_1893 (-32253)                        |
| <i>TM9SF2</i>  | c-MAF_2687 (-143923), c-MAF_2433 (-139981), c-MAF_125 (-66782), c-MAF_3689 (-64132) |
| <i>TMBIM1</i>  | c-MAF_1805 (+2428)                                                                  |
| <i>TMBIM6</i>  | c-MAF_3739 (+21064)                                                                 |
| <i>TMC1</i>    | c-MAF_2139 (-78224), c-MAF_3608 (+3442), c-MAF_3359 (+35997)                        |
| <i>TMC5</i>    | c-MAF_2546 (-116247), c-MAF_4192 (-30015), c-MAF_1138 (+106944)                     |
| <i>TMCC2</i>   | c-MAF_6066 (+9944)                                                                  |

|                 |                                                                                                                                                                          |
|-----------------|--------------------------------------------------------------------------------------------------------------------------------------------------------------------------|
| <i>TMCC3</i>    | c-MAF_779 (+9794)                                                                                                                                                        |
| <i>TMCO4</i>    | c-MAF_2462 (+34184)                                                                                                                                                      |
| <i>TMCO5A</i>   | c-MAF_2720 (+115408), c-MAF_4180 (+137207), c-MAF_2582 (+150043), c-MAF_4840 (+156303)                                                                                   |
| <i>TMED10</i>   | c-MAF_2529 (-82307)                                                                                                                                                      |
| <i>TMED4</i>    | c-MAF_4235 (-277)                                                                                                                                                        |
| <i>TMED5</i>    | c-MAF_1621 (-624)                                                                                                                                                        |
| <i>TMEM106A</i> | c-MAF_1344 (+64591), c-MAF_4505 (+74829)                                                                                                                                 |
| <i>TMEM107</i>  | c-MAF_6043 (-10958), c-MAF_2427 (+3082)                                                                                                                                  |
| <i>TMEM108</i>  | c-MAF_5076 (-30611)                                                                                                                                                      |
| <i>TMEM116</i>  | c-MAF_2443 (+18444)                                                                                                                                                      |
| <i>TMEM119</i>  | c-MAF_270 (-19152), c-MAF_3619 (+29110)                                                                                                                                  |
| <i>TMEM123</i>  | c-MAF_5633 (-6)                                                                                                                                                          |
| <i>TMEM131</i>  | c-MAF_1530 (+125209), c-MAF_2625 (+145630)                                                                                                                               |
| <i>TMEM136</i>  | c-MAF_4666 (-80709)                                                                                                                                                      |
| <i>TMEM140</i>  | c-MAF_6497 (-274), c-MAF_5762 (+12201)                                                                                                                                   |
| <i>TMEM14E</i>  | c-MAF_6223 (+9685), c-MAF_5417 (+17046), c-MAF_3460 (+30833), c-MAF_1292 (+71531)                                                                                        |
| <i>TMEM154</i>  | c-MAF_5313 (+125777)                                                                                                                                                     |
| <i>TMEM155</i>  | c-MAF_5164 (+58361)                                                                                                                                                      |
| <i>TMEM156</i>  | c-MAF_3197 (+1594)                                                                                                                                                       |
| <i>TMEM158</i>  | c-MAF_4579 (+58785)                                                                                                                                                      |
| <i>TMEM163</i>  | c-MAF_2063 (+35321), c-MAF_4509 (+136326)                                                                                                                                |
| <i>TMEM164</i>  | c-MAF_3443 (-162265), c-MAF_4751 (+142987)                                                                                                                               |
| <i>TMEM165</i>  | c-MAF_2238 (+777)                                                                                                                                                        |
| <i>TMEM167A</i> | c-MAF_108 (+6002)                                                                                                                                                        |
| <i>TMEM167B</i> | c-MAF_5453 (+1404)                                                                                                                                                       |
| <i>TMEM170B</i> | c-MAF_3262 (-184177), c-MAF_5227 (+174372)                                                                                                                               |
| <i>TMEM171</i>  | c-MAF_3342 (-128745), c-MAF_4894 (+40155)                                                                                                                                |
| <i>TMEM173</i>  | c-MAF_2341 (-31819)                                                                                                                                                      |
| <i>TMEM174</i>  | c-MAF_4894 (-12748)                                                                                                                                                      |
| <i>TMEM176A</i> | c-MAF_2357 (-51840), c-MAF_6564 (-44720)                                                                                                                                 |
| <i>TMEM177</i>  | c-MAF_2802 (+25682)                                                                                                                                                      |
| <i>TMEM18</i>   | c-MAF_5119 (+127)                                                                                                                                                        |
| <i>TMEM181</i>  | c-MAF_6364 (-177689)                                                                                                                                                     |
| <i>TMEM184B</i> | c-MAF_2759 (+54316)                                                                                                                                                      |
| <i>TMEM187</i>  | c-MAF_2209 (+9607)                                                                                                                                                       |
| <i>TMEM194B</i> | c-MAF_1725 (-28574), c-MAF_1480 (+82769)                                                                                                                                 |
| <i>TMEM2</i>    | c-MAF_4102 (-140163), c-MAF_6667 (-53826), c-MAF_6213 (-26668), c-MAF_4191 (-14493), c-MAF_1509 (+20328), c-MAF_3758 (+58523), c-MAF_4825 (+78617), c-MAF_2714 (+129943) |
| <i>TMEM200A</i> | c-MAF_2977 (-55265), c-MAF_1128 (+138850), c-MAF_4337 (+156276), c-MAF_3995 (+165254)                                                                                    |
| <i>TMEM201</i>  | c-MAF_5365 (+38354), c-MAF_3388 (+40827)                                                                                                                                 |
| <i>TMEM204</i>  | c-MAF_5043 (+26210)                                                                                                                                                      |
| <i>TMEM206</i>  | c-MAF_5463 (+111777)                                                                                                                                                     |
| <i>TMEM207</i>  | c-MAF_5612 (+3071)                                                                                                                                                       |
| <i>TMEM211</i>  | c-MAF_3546 (-129687), c-MAF_2910 (-80442), c-MAF_673 (-47580), c-MAF_4739 (+19568)                                                                                       |
| <i>TMEM212</i>  | c-MAF_6685 (-15273)                                                                                                                                                      |

|                  |                                                                                                                                                                                           |
|------------------|-------------------------------------------------------------------------------------------------------------------------------------------------------------------------------------------|
| <i>TMEM217</i>   | c-MAF_919 (+74163)                                                                                                                                                                        |
| <i>TMEM242</i>   | c-MAF_5841 (-3575)                                                                                                                                                                        |
| <i>TMEM244</i>   | c-MAF_2677 (+94148)                                                                                                                                                                       |
| <i>TMEM248</i>   | c-MAF_6372 (-72710), c-MAF_81 (-60783), c-MAF_3841 (-43467)                                                                                                                               |
| <i>TMEM252</i>   | c-MAF_4268 (-112468), c-MAF_6206 (-110760)                                                                                                                                                |
| <i>TMEM255A</i>  | c-MAF_2074 (+8881)                                                                                                                                                                        |
| <i>TMEM260</i>   | c-MAF_6220 (-64893)                                                                                                                                                                       |
| <i>TMEM30B</i>   | c-MAF_5468 (+177914)                                                                                                                                                                      |
| <i>TMEM39A</i>   | c-MAF_1315 (+140507), c-MAF_945 (+166523)                                                                                                                                                 |
| <i>TMEM41B</i>   | c-MAF_6729 (-46967), c-MAF_5962 (-32605), c-MAF_575 (-27143), c-MAF_3536 (-200)                                                                                                           |
| <i>TMEM45B</i>   | c-MAF_2389 (+30878)                                                                                                                                                                       |
| <i>TMEM51</i>    | c-MAF_1671 (-40229), c-MAF_5017 (+176430)                                                                                                                                                 |
| <i>TMEM53</i>    | c-MAF_6305 (-56198), c-MAF_4081 (-47408)                                                                                                                                                  |
| <i>TMEM54</i>    | c-MAF_2243 (-38511), c-MAF_6333 (-34896)                                                                                                                                                  |
| <i>TMEM55A</i>   | c-MAF_6670 (+388)                                                                                                                                                                         |
| <i>TMEM55B</i>   | c-MAF_3019 (-193)                                                                                                                                                                         |
| <i>TMEM60</i>    | c-MAF_4170 (-36121), c-MAF_202 (-33274), c-MAF_646 (-4539)                                                                                                                                |
| <i>TMEM64</i>    | c-MAF_4836 (+17844)                                                                                                                                                                       |
| <i>TMEM65</i>    | c-MAF_4776 (+81), c-MAF_3935 (+2169), c-MAF_5828 (+8385), c-MAF_299 (+110653), c-MAF_1555 (+151967), c-MAF_462 (+172610)                                                                  |
| <i>TMEM66</i>    | c-MAF_5888 (+690), c-MAF_510 (+92111)                                                                                                                                                     |
| <i>TMEM70</i>    | c-MAF_5821 (-392)                                                                                                                                                                         |
| <i>TMEM74B</i>   | c-MAF_2870 (+34029)                                                                                                                                                                       |
| <i>TMEM75</i>    | c-MAF_834 (-179657), c-MAF_759 (-128767), c-MAF_3151 (-116109), c-MAF_897 (-87010), c-MAF_5370 (-59500), c-MAF_1225 (-44910), c-MAF_249 (-39567), c-MAF_557 (-32360), c-MAF_4404 (+32004) |
| <i>TMEM78</i>    | c-MAF_313 (+4200)                                                                                                                                                                         |
| <i>TMEM86B</i>   | c-MAF_4685 (-24876), c-MAF_5407 (-22473)                                                                                                                                                  |
| <i>TMEM87B</i>   | c-MAF_4510 (-101944)                                                                                                                                                                      |
| <i>TMEM88</i>    | c-MAF_1019 (-12163)                                                                                                                                                                       |
| <i>TMEM97</i>    | c-MAF_5050 (-40541), c-MAF_4893 (-22675), c-MAF_3678 (+8487)                                                                                                                              |
| <i>TMEM99</i>    | c-MAF_3843 (-337)                                                                                                                                                                         |
| <i>TMIGD1</i>    | c-MAF_991 (-29956)                                                                                                                                                                        |
| <i>TMOD1</i>     | c-MAF_5353 (+9971), c-MAF_1422 (+58150)                                                                                                                                                   |
| <i>TMPPE</i>     | c-MAF_1357 (+29159), c-MAF_4166 (+33583), c-MAF_5037 (+41494), c-MAF_1845 (+50083), c-MAF_1707 (+73445), c-MAF_6728 (+90656), c-MAF_2291 (+120755)                                        |
| <i>TMPRSS11B</i> | c-MAF_5995 (-73549)                                                                                                                                                                       |
| <i>TMPRSS13</i>  | c-MAF_3639 (-30236)                                                                                                                                                                       |
| <i>TMPRSS4</i>   | c-MAF_43 (-73560), c-MAF_5194 (-68694)                                                                                                                                                    |
| <i>TMPRSS5</i>   | c-MAF_2285 (+112427), c-MAF_4965 (+118683)                                                                                                                                                |
| <i>TMPRSS6</i>   | c-MAF_3206 (-18665), c-MAF_4664 (+8497), c-MAF_1768 (+23705)                                                                                                                              |
| <i>TMPRSS7</i>   | c-MAF_4475 (-26016)                                                                                                                                                                       |
| <i>TMSB10</i>    | c-MAF_2047 (-219), c-MAF_2872 (+32756)                                                                                                                                                    |
| <i>TMSB4X</i>    | c-MAF_4592 (-14033), c-MAF_4117 (-302), c-MAF_2396 (+3049), c-MAF_2176 (+25392)                                                                                                           |
| <i>TMTC1</i>     | c-MAF_5276 (+1181), c-MAF_5917 (+50478)                                                                                                                                                   |
| <i>TMTC3</i>     | c-MAF_6255 (-47), c-MAF_143 (+157488)                                                                                                                                                     |
| <i>TMTC4</i>     | c-MAF_4670 (-33166)                                                                                                                                                                       |
| <i>TMX1</i>      | c-MAF_4777 (+58917), c-MAF_1202 (+88101)                                                                                                                                                  |

|                  |                                                                                                                                                    |
|------------------|----------------------------------------------------------------------------------------------------------------------------------------------------|
| <i>TMX3</i>      | c-MAF_3996 (-138)                                                                                                                                  |
| <i>TNC</i>       | c-MAF_4813 (+74978), c-MAF_3471 (+82061), c-MAF_1244 (+111511), c-MAF_700 (+159638)                                                                |
| <i>TNFAIP3</i>   | c-MAF_4763 (-178808), c-MAF_5410 (-144550), c-MAF_5744 (+37410), c-MAF_6469 (+60615), c-MAF_920 (+103072), c-MAF_2934 (+108176)                    |
| <i>TNFAIP8</i>   | c-MAF_5319 (-75967), c-MAF_1286 (-53984), c-MAF_1363 (-38629), c-MAF_173 (-25356), c-MAF_5249 (+14187), c-MAF_6525 (+43482)                        |
| <i>TNFRSF10A</i> | c-MAF_5899 (-177)                                                                                                                                  |
| <i>TNFRSF11A</i> | c-MAF_5956 (-43517), c-MAF_6177 (+22046), c-MAF_3155 (+95004)                                                                                      |
| <i>TNFRSF13B</i> | c-MAF_338 (-16742)                                                                                                                                 |
| <i>TNFRSF13C</i> | c-MAF_3108 (-14430)                                                                                                                                |
| <i>TNFRSF14</i>  | c-MAF_4657 (-178)                                                                                                                                  |
| <i>TNFRSF18</i>  | c-MAF_3175 (+4990)                                                                                                                                 |
| <i>TNFRSF19</i>  | c-MAF_1272 (+173127)                                                                                                                               |
| <i>TNFRSF1A</i>  | c-MAF_2445 (+4719)                                                                                                                                 |
| <i>TNFRSF1B</i>  | c-MAF_5934 (-78936), c-MAF_4812 (-39173), c-MAF_5867 (-9603), c-MAF_1686 (-4960), c-MAF_6201 (+640)                                                |
| <i>TNFRSF8</i>   | c-MAF_6178 (-44132), c-MAF_1450 (-15774), c-MAF_1821 (-11060), c-MAF_1400 (-2359), c-MAF_5934 (+24690), c-MAF_4812 (+64453), c-MAF_5867 (+94023)   |
| <i>TNFRSF9</i>   | c-MAF_3280 (-13186), c-MAF_329 (-8390)                                                                                                             |
| <i>TNFSF10</i>   | c-MAF_5635 (-68882)                                                                                                                                |
| <i>TNFSF11</i>   | c-MAF_92 (-180698), c-MAF_1215 (-168331), c-MAF_432 (-87176)                                                                                       |
| <i>TNFSF14</i>   | c-MAF_5943 (-4598), c-MAF_3980 (+284), c-MAF_6269 (+8679), c-MAF_2902 (+15573), c-MAF_3240 (+30883), c-MAF_3229 (+71877)                           |
| <i>TNFSF15</i>   | c-MAF_5808 (-102672), c-MAF_2604 (-92883), c-MAF_4276 (-29458), c-MAF_1469 (+36257), c-MAF_6126 (+87174), c-MAF_944 (+114944)                      |
| <i>TNFSF8</i>    | c-MAF_4813 (-112861), c-MAF_3471 (-105778), c-MAF_1244 (-76328), c-MAF_700 (-28201), c-MAF_5808 (+21619), c-MAF_2604 (+31408), c-MAF_4276 (+94833) |
| <i>TNFSF9</i>    | c-MAF_1599 (-12587), c-MAF_6723 (-11462)                                                                                                           |
| <i>TNIPI</i>     | c-MAF_6211 (-72619), c-MAF_5903 (-44202), c-MAF_6731 (+14206)                                                                                      |
| <i>TNIP3</i>     | c-MAF_2538 (-80889), c-MAF_112 (-45261), c-MAF_3096 (-29062), c-MAF_641 (-16163), c-MAF_992 (-339), c-MAF_6769 (+38019)                            |
| <i>TNK1</i>      | c-MAF_2277 (+14015)                                                                                                                                |
| <i>TNPO1</i>     | c-MAF_6435 (+79729)                                                                                                                                |
| <i>TNPO2</i>     | c-MAF_3770 (+1128)                                                                                                                                 |
| <i>TNRC18</i>    | c-MAF_3024 (-1686)                                                                                                                                 |
| <i>TNRC6A</i>    | c-MAF_1944 (-457)                                                                                                                                  |
| <i>TNRC6B</i>    | c-MAF_4644 (+18864), c-MAF_6106 (+107792), c-MAF_4862 (+110199), c-MAF_4194 (+157012)                                                              |
| <i>TNS3</i>      | c-MAF_6339 (+57422)                                                                                                                                |
| <i>TNS4</i>      | c-MAF_6088 (-15269), c-MAF_4295 (+20646)                                                                                                           |
| <i>TOB1</i>      | c-MAF_2210 (+1030)                                                                                                                                 |
| <i>TOB2</i>      | c-MAF_2739 (+21207), c-MAF_968 (+43027)                                                                                                            |
| <i>TOMI</i>      | c-MAF_6571 (+72299)                                                                                                                                |
| <i>TOMM20</i>    | c-MAF_6137 (+49521), c-MAF_59 (+144525), c-MAF_3427 (+171999), c-MAF_4364 (+175493), c-MAF_5104 (+181227)                                          |
| <i>TOMM7</i>     | c-MAF_5385 (-173699)                                                                                                                               |
| <i>TOP1</i>      | c-MAF_219 (-25099), c-MAF_2144 (+19333)                                                                                                            |
| <i>TOP1MT</i>    | c-MAF_530 (-26830)                                                                                                                                 |
| <i>TOR2A</i>     | c-MAF_5046 (-41354)                                                                                                                                |
| <i>TOR3A</i>     | c-MAF_2251 (+40036), c-MAF_3951 (+47946)                                                                                                           |
| <i>TOX</i>       | c-MAF_4996 (+8190), c-MAF_3679 (+18582)                                                                                                            |
| <i>TOX2</i>      | c-MAF_3014 (+28037), c-MAF_489 (+35462), c-MAF_417 (+40459)                                                                                        |
| <i>TP53I11</i>   | c-MAF_5996 (-143322), c-MAF_2657 (-133505), c-MAF_6555 (+87723)                                                                                    |

|                 |                                                                                                                                                                                                                                        |
|-----------------|----------------------------------------------------------------------------------------------------------------------------------------------------------------------------------------------------------------------------------------|
| <i>TP53INP1</i> | c-MAF_1780 (-11023), c-MAF_3672 (-6803), c-MAF_3529 (+20390)                                                                                                                                                                           |
| <i>TP53TG3B</i> | c-MAF_2272 (+32518)                                                                                                                                                                                                                    |
| <i>TP63</i>     | c-MAF_380 (-128532), c-MAF_3734 (-101925), c-MAF_4185 (-94166), c-MAF_2801 (-67473), c-MAF_2682 (-9202)                                                                                                                                |
| <i>TPBGL</i>    | c-MAF_6004 (-87818)                                                                                                                                                                                                                    |
| <i>TPCN2</i>    | c-MAF_2273 (-313)                                                                                                                                                                                                                      |
| <i>TPD52L2</i>  | c-MAF_4346 (-22), c-MAF_73 (+8333)                                                                                                                                                                                                     |
| <i>TPGS2</i>    | c-MAF_3062 (+67038)                                                                                                                                                                                                                    |
| <i>TPK1</i>     | c-MAF_6001 (+14861)                                                                                                                                                                                                                    |
| <i>TPM4</i>     | c-MAF_4425 (+11797)                                                                                                                                                                                                                    |
| <i>TPP1</i>     | c-MAF_5868 (+1379)                                                                                                                                                                                                                     |
| <i>TPP2</i>     | c-MAF_1180 (-4359), c-MAF_6701 (+84016)                                                                                                                                                                                                |
| <i>TPRA1</i>    | c-MAF_4949 (+14963)                                                                                                                                                                                                                    |
| <i>TPRG1</i>    | c-MAF_763 (+152917)                                                                                                                                                                                                                    |
| <i>TPST2</i>    | c-MAF_5061 (-20308), c-MAF_630 (+43120), c-MAF_1983 (+54922)                                                                                                                                                                           |
| <i>TPT1</i>     | c-MAF_5838 (-54913), c-MAF_2933 (+415), c-MAF_6187 (+83293)                                                                                                                                                                            |
| <i>TRABD2A</i>  | c-MAF_4099 (+99060)                                                                                                                                                                                                                    |
| <i>TRADD</i>    | c-MAF_4133 (+586)                                                                                                                                                                                                                      |
| <i>TRAF1</i>    | c-MAF_1325 (-7773), c-MAF_994 (+3639), c-MAF_3760 (+35842)                                                                                                                                                                             |
| <i>TRAF3</i>    | c-MAF_5208 (-123000), c-MAF_908 (+28255)                                                                                                                                                                                               |
| <i>TRAF3IP2</i> | c-MAF_6627 (-182837), c-MAF_4884 (-158225), c-MAF_3774 (-155827), c-MAF_437 (-153925), c-MAF_2588 (-144927), c-MAF_1800 (+31731)                                                                                                       |
| <i>TRAF3IP3</i> | c-MAF_3438 (+11051)                                                                                                                                                                                                                    |
| <i>TRAF5</i>    | c-MAF_116 (-45681), c-MAF_2128 (-3444), c-MAF_3515 (+51358)                                                                                                                                                                            |
| <i>TRAF6</i>    | c-MAF_446 (+88993), c-MAF_6057 (+115173), c-MAF_39 (+132600)                                                                                                                                                                           |
| <i>TRAFD1</i>   | c-MAF_5340 (+108), c-MAF_931 (+5141)                                                                                                                                                                                                   |
| <i>TRANK1</i>   | c-MAF_3957 (+36911)                                                                                                                                                                                                                    |
| <i>TRAP1</i>    | c-MAF_6141 (-139773)                                                                                                                                                                                                                   |
| <i>TRAPPC10</i> | c-MAF_5378 (+44483), c-MAF_1711 (+71503)                                                                                                                                                                                               |
| <i>TRAPPC11</i> | c-MAF_1149 (-95308), c-MAF_4312 (-74562)                                                                                                                                                                                               |
| <i>TRAPPC12</i> | c-MAF_1954 (-156391)                                                                                                                                                                                                                   |
| <i>TRAPPC2</i>  | c-MAF_4395 (+17857)                                                                                                                                                                                                                    |
| <i>TRAPPC9</i>  | c-MAF_3281 (-5969)                                                                                                                                                                                                                     |
| <i>TRAT1</i>    | c-MAF_473 (-16143), c-MAF_3627 (+12442)                                                                                                                                                                                                |
| <i>TREH</i>     | c-MAF_1032 (-12968)                                                                                                                                                                                                                    |
| <i>TRERF1</i>   | c-MAF_4990 (+159704)                                                                                                                                                                                                                   |
| <i>TREX1</i>    | c-MAF_109 (+13601)                                                                                                                                                                                                                     |
| <i>TRHR</i>     | c-MAF_5731 (+148659)                                                                                                                                                                                                                   |
| <i>TRIB1</i>    | c-MAF_1131 (-132034), c-MAF_4662 (-127195), c-MAF_6067 (-122439), c-MAF_6722 (-94557), c-MAF_4532 (-12604), c-MAF_955 (-162), c-MAF_5840 (+36970), c-MAF_3921 (+79881), c-MAF_1982 (+82947), c-MAF_5202 (+98554), c-MAF_4382 (+177977) |
| <i>TRIB2</i>    | c-MAF_4977 (-161611), c-MAF_3142 (-554), c-MAF_3960 (+44417)                                                                                                                                                                           |
| <i>TRIM2</i>    | c-MAF_6313 (-44345)                                                                                                                                                                                                                    |
| <i>TRIM22</i>   | c-MAF_3868 (+5198)                                                                                                                                                                                                                     |
| <i>TRIM24</i>   | c-MAF_3055 (-109511)                                                                                                                                                                                                                   |
| <i>TRIM25</i>   | c-MAF_5471 (-23804), c-MAF_1491 (-5084), c-MAF_6318 (-1867), c-MAF_3650 (+43699)                                                                                                                                                       |
| <i>TRIM28</i>   | c-MAF_6534 (+2059)                                                                                                                                                                                                                     |

|                |                                                                                                     |
|----------------|-----------------------------------------------------------------------------------------------------|
| <i>TRIM29</i>  | c-MAF_4355 (-48594)                                                                                 |
| <i>TRIM33</i>  | c-MAF_5479 (+169747)                                                                                |
| <i>TRIM36</i>  | c-MAF_5751 (-29267)                                                                                 |
| <i>TRIM41</i>  | c-MAF_5004 (-1635)                                                                                  |
| <i>TRIM43</i>  | c-MAF_705 (-60460)                                                                                  |
| <i>TRIM45</i>  | c-MAF_5768 (+10758), c-MAF_1786 (+44316)                                                            |
| <i>TRIM50</i>  | c-MAF_3216 (-2377)                                                                                  |
| <i>TRIM56</i>  | c-MAF_4216 (+14851)                                                                                 |
| <i>TRIM62</i>  | c-MAF_144 (+54070), c-MAF_529 (+82141)                                                              |
| <i>TRIM69</i>  | c-MAF_448 (-213), c-MAF_5485 (+7080), c-MAF_4474 (+59945), c-MAF_3490 (+73595), c-MAF_876 (+153896) |
| <i>TRIM7</i>   | c-MAF_6300 (+15376)                                                                                 |
| <i>TRIM8</i>   | c-MAF_5144 (-11497), c-MAF_2498 (+2123), c-MAF_1182 (+16743), c-MAF_4891 (+60614)                   |
| <i>TRIP11</i>  | c-MAF_2606 (+59752)                                                                                 |
| <i>TRMT1</i>   | c-MAF_2067 (+708)                                                                                   |
| <i>TRMT112</i> | c-MAF_2257 (+628)                                                                                   |
| <i>TRMT5</i>   | c-MAF_5468 (-122568)                                                                                |
| <i>TRMT6</i>   | c-MAF_1448 (+3069), c-MAF_1232 (+30219)                                                             |
| <i>TRNT1</i>   | c-MAF_3612 (+38533)                                                                                 |
| <i>TRPA1</i>   | c-MAF_2340 (+75135)                                                                                 |
| <i>TRPC1</i>   | c-MAF_3856 (+163023)                                                                                |
| <i>TRPC4AP</i> | c-MAF_3579 (+7168)                                                                                  |
| <i>TRPM6</i>   | c-MAF_4798 (-139516)                                                                                |
| <i>TRPM7</i>   | c-MAF_861 (-77690), c-MAF_10 (+125256)                                                              |
| <i>TRPM8</i>   | c-MAF_6621 (+115268)                                                                                |
| <i>TRRAP</i>   | c-MAF_1100 (+3793)                                                                                  |
| <i>TRUB1</i>   | c-MAF_2380 (-136659), c-MAF_5098 (-81119), c-MAF_4357 (-26934), c-MAF_3263 (-4358)                  |
| <i>TSEN15</i>  | c-MAF_6706 (+74867), c-MAF_34 (+108761)                                                             |
| <i>TSHZ3</i>   | c-MAF_5740 (+135258)                                                                                |
| <i>TSPAN13</i> | c-MAF_2386 (-41620)                                                                                 |
| <i>TSPAN14</i> | c-MAF_6455 (+12799), c-MAF_2617 (+29991), c-MAF_5600 (+81640)                                       |
| <i>TSPAN15</i> | c-MAF_3476 (-4612)                                                                                  |
| <i>TSPAN18</i> | c-MAF_6555 (+98012)                                                                                 |
| <i>TSPAN3</i>  | c-MAF_256 (-116748), c-MAF_5007 (+68033)                                                            |
| <i>TSPAN5</i>  | c-MAF_4710 (+88103), c-MAF_3873 (+147546), c-MAF_5508 (+175465)                                     |
| <i>TSR2</i>    | c-MAF_5182 (-198)                                                                                   |
| <i>TSSK1B</i>  | c-MAF_6329 (+165183)                                                                                |
| <i>TSTA3</i>   | c-MAF_1955 (-19097)                                                                                 |
| <i>TSTD2</i>   | c-MAF_1422 (+74245), c-MAF_5353 (+122424)                                                           |
| <i>TTBK1</i>   | c-MAF_1956 (+13805)                                                                                 |
| <i>TTC21B</i>  | c-MAF_4361 (+651)                                                                                   |
| <i>TTC27</i>   | c-MAF_4350 (+129510)                                                                                |
| <i>TTC39A</i>  | c-MAF_3003 (-160195), c-MAF_445 (-88762), c-MAF_2524 (-85030)                                       |
| <i>TTF2</i>    | c-MAF_1786 (+17109), c-MAF_5768 (+50667)                                                            |
| <i>TTII</i>    | c-MAF_3883 (+43503)                                                                                 |
| <i>TLL1</i>    | c-MAF_5281 (-14804)                                                                                 |

|                   |                                                                                                                                                                                                                                                      |
|-------------------|------------------------------------------------------------------------------------------------------------------------------------------------------------------------------------------------------------------------------------------------------|
| <i>TLL10</i>      | c-MAF_3175 (+27678)                                                                                                                                                                                                                                  |
| <i>TLL12</i>      | c-MAF_5966 (-76847)                                                                                                                                                                                                                                  |
| <i>TLL2</i>       | c-MAF_6238 (+26220)                                                                                                                                                                                                                                  |
| <i>TLL8</i>       | c-MAF_3695 (+80398)                                                                                                                                                                                                                                  |
| <i>TTYH1</i>      | c-MAF_2824 (-41169), c-MAF_230 (-31591)                                                                                                                                                                                                              |
| <i>TTYH3</i>      | c-MAF_3879 (+9681)                                                                                                                                                                                                                                   |
| <i>TUBA1A</i>     | c-MAF_2577 (-63924), c-MAF_5070 (-47076)                                                                                                                                                                                                             |
| <i>TUBA1C</i>     | c-MAF_5070 (-28507), c-MAF_2577 (-11659), c-MAF_2049 (+3843)                                                                                                                                                                                         |
| <i>TUBA4A</i>     | c-MAF_3601 (-922)                                                                                                                                                                                                                                    |
| <i>TUBB</i>       | c-MAF_1617 (-2525), c-MAF_809 (-283)                                                                                                                                                                                                                 |
| <i>TUBB1</i>      | c-MAF_6746 (+1886)                                                                                                                                                                                                                                   |
| <i>TUBB2A</i>     | c-MAF_4150 (-48526)                                                                                                                                                                                                                                  |
| <i>TUBB2B</i>     | c-MAF_4150 (+21683)                                                                                                                                                                                                                                  |
| <i>TUBB4A</i>     | c-MAF_6723 (-16953), c-MAF_1599 (-15828), c-MAF_5435 (+13226)                                                                                                                                                                                        |
| <i>TUBD1</i>      | c-MAF_6 (+63591), c-MAF_25 (+106230), c-MAF_4473 (+138231)                                                                                                                                                                                           |
| <i>TULP1</i>      | c-MAF_1371 (-98392)                                                                                                                                                                                                                                  |
| <i>TULP4</i>      | c-MAF_3683 (-111443), c-MAF_1421 (-100903), c-MAF_4157 (-27985), c-MAF_6364 (+46087)                                                                                                                                                                 |
| <i>TUSC5</i>      | c-MAF_4132 (+80804)                                                                                                                                                                                                                                  |
| <i>TVP23A</i>     | c-MAF_28 (+69242)                                                                                                                                                                                                                                    |
| <i>TWF1</i>       | c-MAF_2040 (-317)                                                                                                                                                                                                                                    |
| <i>TXLNB</i>      | c-MAF_3727 (-31669), c-MAF_957 (+142), c-MAF_3248 (+34675), c-MAF_50 (+38742), c-MAF_5352 (+129872), c-MAF_4484 (+155395)                                                                                                                            |
| <i>TXNDC11</i>    | c-MAF_456 (-5680)                                                                                                                                                                                                                                    |
| <i>TXNDC16</i>    | c-MAF_6252 (-25), c-MAF_2400 (+94460)                                                                                                                                                                                                                |
| <i>TXNDC2</i>     | c-MAF_6101 (-8713)                                                                                                                                                                                                                                   |
| <i>TXNDC5</i>     | c-MAF_3127 (-9846)                                                                                                                                                                                                                                   |
| <i>TXNL4A</i>     | c-MAF_6560 (+25198)                                                                                                                                                                                                                                  |
| <i>TYMP</i>       | c-MAF_3631 (-9654)                                                                                                                                                                                                                                   |
| <i>TYMS</i>       | c-MAF_3095 (+1331)                                                                                                                                                                                                                                   |
| <i>TYROBP</i>     | c-MAF_661 (-5567)                                                                                                                                                                                                                                    |
| <i>UBA3</i>       | c-MAF_2366 (-2593)                                                                                                                                                                                                                                   |
| <i>UBA6</i>       | c-MAF_221 (-26177), c-MAF_3505 (+15751)                                                                                                                                                                                                              |
| <i>UBAC1</i>      | c-MAF_3667 (+34362)                                                                                                                                                                                                                                  |
| <i>UBAC2</i>      | c-MAF_2328 (-150466), c-MAF_4088 (+13773), c-MAF_2356 (+56078)                                                                                                                                                                                       |
| <i>UBAP1</i>      | c-MAF_2921 (+7414)                                                                                                                                                                                                                                   |
| <i>UBASH3A</i>    | c-MAF_1188 (+21428), c-MAF_2818 (+36180)                                                                                                                                                                                                             |
| <i>UBASH3B</i>    | c-MAF_3694 (+19646), c-MAF_928 (+35228), c-MAF_424 (+41246), c-MAF_4317 (+45760), c-MAF_60 (+48502), c-MAF_993 (+61978), c-MAF_1914 (+68062), c-MAF_3135 (+71762), c-MAF_509 (+86884), c-MAF_387 (+93457), c-MAF_649 (+120239), c-MAF_4968 (+122679) |
| <i>UBC</i>        | c-MAF_3352 (-24074), c-MAF_1281 (-6205), c-MAF_731 (-1881), c-MAF_6286 (+4381)                                                                                                                                                                       |
| <i>UBE2B</i>      | c-MAF_3605 (+65979), c-MAF_4220 (+139811)                                                                                                                                                                                                            |
| <i>UBE2D1</i>     | c-MAF_3042 (-52220)                                                                                                                                                                                                                                  |
| <i>UBE2D2</i>     | c-MAF_2341 (-46557)                                                                                                                                                                                                                                  |
| <i>UBE2D3</i>     | c-MAF_2629 (+88318)                                                                                                                                                                                                                                  |
| <i>UBE2E3</i>     | c-MAF_5890 (+142), c-MAF_3057 (+143362)                                                                                                                                                                                                              |
| <i>UBE2F-SCLY</i> | c-MAF_3714 (+31703)                                                                                                                                                                                                                                  |

|                |                                                                                     |
|----------------|-------------------------------------------------------------------------------------|
| <i>UBE2G1</i>  | c-MAF_5598 (+53502)                                                                 |
| <i>UBE2J1</i>  | c-MAF_4924 (-32409)                                                                 |
| <i>UBE2Q2</i>  | c-MAF_5623 (-6180)                                                                  |
| <i>UBE2QL1</i> | c-MAF_4065 (+47768)                                                                 |
| <i>UBE2R2</i>  | c-MAF_748 (-861), c-MAF_5628 (+18826), c-MAF_5326 (+170934)                         |
| <i>UBE2V1</i>  | c-MAF_3143 (+4362)                                                                  |
| <i>UBE2W</i>   | c-MAF_2235 (-1478)                                                                  |
| <i>UBE3C</i>   | c-MAF_4530 (-122390), c-MAF_1466 (+163689)                                          |
| <i>UBE4B</i>   | c-MAF_3020 (+40981)                                                                 |
| <i>UBQLN2</i>  | c-MAF_3947 (-191)                                                                   |
| <i>UBR3</i>    | c-MAF_4119 (+101144)                                                                |
| <i>UBR5</i>    | c-MAF_4152 (-123364), c-MAF_5938 (-118148)                                          |
| <i>UBTD2</i>   | c-MAF_2117 (-159676), c-MAF_6557 (+11916)                                           |
| <i>UBXN1</i>   | c-MAF_3677 (+7291)                                                                  |
| <i>UBXN4</i>   | c-MAF_4090 (+1007)                                                                  |
| <i>UBXN7</i>   | c-MAF_3847 (-203)                                                                   |
| <i>UCHL5</i>   | c-MAF_3293 (+73142)                                                                 |
| <i>UCK1</i>    | c-MAF_1996 (-114123), c-MAF_2343 (-96820)                                           |
| <i>UCP3</i>    | c-MAF_123 (-81341), c-MAF_4700 (-10686), c-MAF_3380 (-2540)                         |
| <i>UEVLD</i>   | c-MAF_405 (-29503)                                                                  |
| <i>UGP2</i>    | c-MAF_2090 (+14794)                                                                 |
| <i>UIMC1</i>   | c-MAF_6164 (+90142)                                                                 |
| <i>ULK1</i>    | c-MAF_4537 (+1663)                                                                  |
| <i>ULK3</i>    | c-MAF_5546 (-27794)                                                                 |
| <i>UMODL1</i>  | c-MAF_3916 (+117104)                                                                |
| <i>UMPS</i>    | c-MAF_1963 (+61350)                                                                 |
| <i>UNC13D</i>  | c-MAF_493 (+58427)                                                                  |
| <i>UNC45B</i>  | c-MAF_3451 (+29807)                                                                 |
| <i>UNC5CL</i>  | c-MAF_4987 (+76352)                                                                 |
| <i>UNC93B1</i> | c-MAF_6678 (+119142)                                                                |
| <i>UNK</i>     | c-MAF_493 (+1519)                                                                   |
| <i>UPB1</i>    | c-MAF_2111 (-60334), c-MAF_5274 (-20622), c-MAF_4748 (-8375), c-MAF_4572 (+15766)   |
| <i>UPF3A</i>   | c-MAF_1964 (-12561)                                                                 |
| <i>UPK3A</i>   | c-MAF_1500 (-114907)                                                                |
| <i>UQCRC2</i>  | c-MAF_1738 (-11414), c-MAF_3029 (+74061), c-MAF_1211 (+101350)                      |
| <i>UR11</i>    | c-MAF_4676 (+5724)                                                                  |
| <i>USB1</i>    | c-MAF_6544 (-2743)                                                                  |
| <i>USO1</i>    | c-MAF_5662 (+119397)                                                                |
| <i>USP1</i>    | c-MAF_4111 (-74), c-MAF_434 (+25877)                                                |
| <i>USP10</i>   | c-MAF_2104 (+52105)                                                                 |
| <i>USP11</i>   | c-MAF_5100 (+31956)                                                                 |
| <i>USP12</i>   | c-MAF_4311 (+1360), c-MAF_5115 (+24234), c-MAF_977 (+40461)                         |
| <i>USP14</i>   | c-MAF_5747 (+138)                                                                   |
| <i>USP2</i>    | c-MAF_6765 (+20467)                                                                 |
| <i>USP20</i>   | c-MAF_1204 (+27765), c-MAF_4165 (+75250), c-MAF_4444 (+84828), c-MAF_5097 (+109846) |



|               |                                                                                   |
|---------------|-----------------------------------------------------------------------------------|
| <i>USP24</i>  | c-MAF_6380 (-148116), c-MAF_4507 (+25975), c-MAF_3040 (+49921)                    |
| <i>USP3</i>   | c-MAF_6646 (-10027), c-MAF_1034 (-6185), c-MAF_2189 (-819)                        |
| <i>USP32</i>  | c-MAF_5718 (-114403)                                                              |
| <i>USP35</i>  | c-MAF_2939 (+38434), c-MAF_1835 (+103405), c-MAF_6494 (+151136)                   |
| <i>USP36</i>  | c-MAF_5362 (-49823), c-MAF_128 (+23550), c-MAF_3743 (+35502), c-MAF_3316 (+42559) |
| <i>USP37</i>  | c-MAF_6465 (-339)                                                                 |
| <i>USP39</i>  | c-MAF_5072 (+26733)                                                               |
| <i>USP4</i>   | c-MAF_1276 (-11691), c-MAF_4909 (+65792)                                          |
| <i>USP40</i>  | c-MAF_3651 (+138755)                                                              |
| <i>USP42</i>  | c-MAF_1585 (+116621)                                                              |
| <i>USP43</i>  | c-MAF_6010 (+31479), c-MAF_3448 (+114927)                                         |
| <i>USP46</i>  | c-MAF_5197 (+70414)                                                               |
| <i>USP47</i>  | c-MAF_5089 (+41291)                                                               |
| <i>USP48</i>  | c-MAF_4675 (+9967)                                                                |
| <i>USP5</i>   | c-MAF_3140 (+367)                                                                 |
| <i>USP50</i>  | c-MAF_10 (-14860), c-MAF_1091 (+14689)                                            |
| <i>USP7</i>   | c-MAF_2844 (+8339), c-MAF_6105 (+14501), c-MAF_2777 (+34905), c-MAF_3956 (+71564) |
| <i>USP8</i>   | c-MAF_1091 (+107628)                                                              |
| <i>USP9Y</i>  | c-MAF_2405 (-148115), c-MAF_4569 (-37906)                                         |
| <i>USPL1</i>  | c-MAF_3731 (+78713)                                                               |
| <i>UST</i>    | c-MAF_6248 (-180718)                                                              |
| <i>UTP11L</i> | c-MAF_3839 (+15490), c-MAF_6432 (+17444)                                          |
| <i>UTP18</i>  | c-MAF_1297 (+174824)                                                              |
| <i>UTP20</i>  | c-MAF_5646 (+74639)                                                               |
| <i>UTP6</i>   | c-MAF_4934 (+22919)                                                               |
| <i>UTRN</i>   | c-MAF_5906 (-75575), c-MAF_2774 (+52311)                                          |
| <i>UVSSA</i>  | c-MAF_558 (-46133)                                                                |
| <i>VAC14</i>  | c-MAF_435 (-3464)                                                                 |
| <i>VAMP2</i>  | c-MAF_2427 (-10342)                                                               |
| <i>VAMP4</i>  | c-MAF_3278 (+2254)                                                                |
| <i>VANGL1</i> | c-MAF_5408 (+7260)                                                                |
| <i>VANGL2</i> | c-MAF_2753 (+60435)                                                               |
| <i>VAPA</i>   | c-MAF_3176 (+42)                                                                  |
| <i>VASN</i>   | c-MAF_392 (+42613)                                                                |
| <i>VAT1L</i>  | c-MAF_4793 (-55906), c-MAF_135 (-51442)                                           |
| <i>VAV1</i>   | c-MAF_1804 (+41654), c-MAF_4282 (+77439)                                          |
| <i>VAV3</i>   | c-MAF_107 (+28613)                                                                |
| <i>VCL</i>    | c-MAF_1003 (+82013), c-MAF_5149 (+111553)                                         |
| <i>VCP</i>    | c-MAF_5869 (+80745)                                                               |
| <i>VCPIP1</i> | c-MAF_3591 (-169)                                                                 |
| <i>VDAC3</i>  | c-MAF_2436 (+20773)                                                               |
| <i>VDR</i>    | c-MAF_2050 (+13497), c-MAF_2103 (+19723), c-MAF_2996 (+37264)                     |
| <i>VEGFC</i>  | c-MAF_3233 (-110425)                                                              |
| <i>VEZF1</i>  | c-MAF_3971 (+37146)                                                               |
| <i>VEZT</i>   | c-MAF_6136 (+1209), c-MAF_1857 (+6961)                                            |

|                |                                                                                                                                                                        |
|----------------|------------------------------------------------------------------------------------------------------------------------------------------------------------------------|
| <i>VGLL1</i>   | c-MAF_2370 (+45030), c-MAF_3161 (+53297), c-MAF_2709 (+66724), c-MAF_892 (+87952), c-MAF_195 (+94241), c-MAF_178 (+103234), c-MAF_3308 (+107418), c-MAF_2563 (+110624) |
| <i>VIM</i>     | c-MAF_474 (+4135)                                                                                                                                                      |
| <i>VIPAS39</i> | c-MAF_3507 (-273)                                                                                                                                                      |
| <i>VIT</i>     | c-MAF_5110 (+103973)                                                                                                                                                   |
| <i>VLDLR</i>   | c-MAF_2580 (+17321), c-MAF_1748 (+33915)                                                                                                                               |
| <i>VMP1</i>    | c-MAF_4473 (+47239), c-MAF_25 (+79240), c-MAF_6 (+121879)                                                                                                              |
| <i>VOPP1</i>   | c-MAF_1520 (-1644), c-MAF_981 (+37996)                                                                                                                                 |
| <i>VPREB1</i>  | c-MAF_5593 (-36439), c-MAF_487 (-34171)                                                                                                                                |
| <i>VPS13A</i>  | c-MAF_5209 (+116972)                                                                                                                                                   |
| <i>VPS26A</i>  | c-MAF_2130 (+5726)                                                                                                                                                     |
| <i>VPS33B</i>  | c-MAF_2666 (-25049)                                                                                                                                                    |
| <i>VPS41</i>   | c-MAF_5179 (+3970)                                                                                                                                                     |
| <i>VPS45</i>   | c-MAF_6042 (+43180)                                                                                                                                                    |
| <i>VPS54</i>   | c-MAF_2195 (-123830), c-MAF_1291 (-115997), c-MAF_2307 (-110128), c-MAF_4956 (-95160), c-MAF_802 (-17392), c-MAF_2090 (+162568)                                        |
| <i>VSIG4</i>   | c-MAF_5681 (-6929)                                                                                                                                                     |
| <i>VSTM1</i>   | c-MAF_680 (+43564)                                                                                                                                                     |
| <i>VSTM2B</i>  | c-MAF_6699 (+61285)                                                                                                                                                    |
| <i>VSTM2L</i>  | c-MAF_3883 (+86854)                                                                                                                                                    |
| <i>VSTM4</i>   | c-MAF_5335 (-62059), c-MAF_1154 (+35220), c-MAF_412 (+38386)                                                                                                           |
| <i>VT11A</i>   | c-MAF_768 (+85161)                                                                                                                                                     |
| <i>VT11B</i>   | c-MAF_5902 (-5425)                                                                                                                                                     |
| <i>VWA2</i>    | c-MAF_5384 (+98321)                                                                                                                                                    |
| <i>VWA3A</i>   | c-MAF_3029 (-65821), c-MAF_1211 (-38532)                                                                                                                               |
| <i>VWA8</i>    | c-MAF_3912 (+44417)                                                                                                                                                    |
| <i>VWCE</i>    | c-MAF_5363 (+24884)                                                                                                                                                    |
| <i>VWF</i>     | c-MAF_3125 (+55070)                                                                                                                                                    |
| <i>WAPAL</i>   | c-MAF_1102 (+110257)                                                                                                                                                   |
| <i>WARS</i>    | c-MAF_4096 (+776)                                                                                                                                                      |
| <i>WBP1L</i>   | c-MAF_902 (-24258)                                                                                                                                                     |
| <i>WBP4</i>    | c-MAF_3390 (-63)                                                                                                                                                       |
| <i>WBSCR22</i> | c-MAF_2175 (+32156), c-MAF_1698 (+34442)                                                                                                                               |
| <i>WDFY1</i>   | c-MAF_677 (+3369)                                                                                                                                                      |
| <i>WDFY2</i>   | c-MAF_5915 (+154204)                                                                                                                                                   |
| <i>WDHD1</i>   | c-MAF_6302 (-187)                                                                                                                                                      |
| <i>WDR1</i>    | c-MAF_4258 (+10114), c-MAF_2095 (+20452), c-MAF_5778 (+22829)                                                                                                          |
| <i>WDR19</i>   | c-MAF_2467 (+171492)                                                                                                                                                   |
| <i>WDR43</i>   | c-MAF_1895 (+120462), c-MAF_5440 (+165173)                                                                                                                             |
| <i>WDR44</i>   | c-MAF_5277 (+200)                                                                                                                                                      |
| <i>WDR45B</i>  | c-MAF_6556 (+58982)                                                                                                                                                    |
| <i>WDR48</i>   | c-MAF_6039 (+30894)                                                                                                                                                    |
| <i>WDR49</i>   | c-MAF_2539 (-52499)                                                                                                                                                    |
| <i>WDR59</i>   | c-MAF_2317 (+47928)                                                                                                                                                    |
| <i>WDR74</i>   | c-MAF_5689 (+256)                                                                                                                                                      |
| <i>WDR81</i>   | c-MAF_2311 (-7607)                                                                                                                                                     |

|                 |                                                                                                                                 |
|-----------------|---------------------------------------------------------------------------------------------------------------------------------|
| <i>WDR82</i>    | c-MAF_4014 (-3542), c-MAF_5794 (+6976), c-MAF_431 (+25118)                                                                      |
| <i>WDYHV1</i>   | c-MAF_3581 (+120349)                                                                                                            |
| <i>WEE1</i>     | c-MAF_814 (-111601), c-MAF_6511 (-7518)                                                                                         |
| <i>WEE2</i>     | c-MAF_4732 (-143948), c-MAF_2042 (-122204), c-MAF_6320 (-47748)                                                                 |
| <i>WFIKKN1</i>  | c-MAF_5239 (+5669)                                                                                                              |
| <i>WFIKKN2</i>  | c-MAF_2210 (+29905)                                                                                                             |
| <i>WHAMM</i>    | c-MAF_2087 (+1597)                                                                                                              |
| <i>WHSC1L1</i>  | c-MAF_4432 (-2855)                                                                                                              |
| <i>WIBG</i>     | c-MAF_958 (+42508)                                                                                                              |
| <i>WIPF1</i>    | c-MAF_262 (+18473), c-MAF_6319 (+26157), c-MAF_1071 (+33925)                                                                    |
| <i>WIP11</i>    | c-MAF_4089 (-8753), c-MAF_5856 (-3310), c-MAF_2557 (+19224), c-MAF_3399 (+57115), c-MAF_1116 (+100717), c-MAF_6054 (+107988)    |
| <i>WISP1</i>    | c-MAF_26 (-118847), c-MAF_602 (-98178), c-MAF_1810 (-51793), c-MAF_2143 (-19797), c-MAF_363 (+26426)                            |
| <i>WISP3</i>    | c-MAF_1007 (-10794)                                                                                                             |
| <i>WNK1</i>     | c-MAF_5186 (-39143), c-MAF_3364 (-36198), c-MAF_5832 (-9177), c-MAF_4267 (-1886), c-MAF_1745 (+17705), c-MAF_5707 (+41005)      |
| <i>WNT11</i>    | c-MAF_1826 (-131142)                                                                                                            |
| <i>WNT16</i>    | c-MAF_6575 (-49957), c-MAF_3334 (+65843)                                                                                        |
| <i>WNT5B</i>    | c-MAF_4048 (-9415)                                                                                                              |
| <i>WNT8B</i>    | c-MAF_254 (-88980), c-MAF_2915 (+43575)                                                                                         |
| <i>WSB1</i>     | c-MAF_5324 (+66615)                                                                                                             |
| <i>WSB2</i>     | c-MAF_1142 (+16887), c-MAF_1018 (+25447)                                                                                        |
| <i>WSCD2</i>    | c-MAF_1533 (+166549)                                                                                                            |
| <i>WTAP</i>     | c-MAF_3897 (-23806)                                                                                                             |
| <i>XBPI</i>     | c-MAF_1041 (-22540), c-MAF_4843 (-10463)                                                                                        |
| <i>XCL2</i>     | c-MAF_4511 (+122583), c-MAF_5700 (+127625), c-MAF_532 (+180715)                                                                 |
| <i>XCRI</i>     | c-MAF_1873 (-177706), c-MAF_3406 (-159408), c-MAF_1855 (-102001), c-MAF_2675 (-83171), c-MAF_1098 (-70860), c-MAF_1236 (-40980) |
| <i>XIAP</i>     | c-MAF_2057 (-23885), c-MAF_5461 (+1776)                                                                                         |
| <i>XIRP1</i>    | c-MAF_2602 (-42280), c-MAF_4452 (-23742), c-MAF_5361 (+14726)                                                                   |
| <i>XKR6</i>     | c-MAF_4972 (+98564)                                                                                                             |
| <i>XPNPEP2</i>  | c-MAF_179 (+20896)                                                                                                              |
| <i>XPNPEP3</i>  | c-MAF_735 (+42094)                                                                                                              |
| <i>XPO4</i>     | c-MAF_2769 (-114656)                                                                                                            |
| <i>XPO6</i>     | c-MAF_3163 (+70641)                                                                                                             |
| <i>XPOT</i>     | c-MAF_1817 (+273)                                                                                                               |
| <i>XRCC6BP1</i> | c-MAF_2598 (-41956)                                                                                                             |
| <i>XRN1</i>     | c-MAF_2244 (+177357)                                                                                                            |
| <i>XRR1</i>     | c-MAF_3821 (+5760), c-MAF_1995 (+22729), c-MAF_5405 (+180654)                                                                   |
| <i>XXYLTI</i>   | c-MAF_2496 (+76415), c-MAF_3775 (+141337)                                                                                       |
| <i>XYLT1</i>    | c-MAF_1349 (-120478), c-MAF_5769 (+95967), c-MAF_2169 (+100339)                                                                 |
| <i>YAF2</i>     | c-MAF_2508 (-61856)                                                                                                             |
| <i>YEATS2</i>   | c-MAF_5675 (+836)                                                                                                               |
| <i>YES1</i>     | c-MAF_4782 (-929)                                                                                                               |
| <i>YIPF5</i>    | c-MAF_4568 (-19373)                                                                                                             |
| <i>YPEL2</i>    | c-MAF_3540 (-44028), c-MAF_5022 (-1776), c-MAF_161 (+103809)                                                                    |
| <i>YRDC</i>     | c-MAF_4680 (-17435), c-MAF_2981 (-15494)                                                                                        |

|                |                                                                                                                                                    |
|----------------|----------------------------------------------------------------------------------------------------------------------------------------------------|
| <i>YTHDC1</i>  | c-MAF_5995 (+30820)                                                                                                                                |
| <i>YWHAB</i>   | c-MAF_6044 (-303)                                                                                                                                  |
| <i>YWHAE</i>   | c-MAF_4132 (+39911)                                                                                                                                |
| <i>YWHAG</i>   | c-MAF_4789 (+10914)                                                                                                                                |
| <i>YWHAH</i>   | c-MAF_1813 (-82727)                                                                                                                                |
| <i>YWHAQ</i>   | c-MAF_4176 (-151848), c-MAF_394 (-133130), c-MAF_2032 (-123892), c-MAF_4518 (-69228), c-MAF_6365 (-33119), c-MAF_5925 (+3143), c-MAF_6180 (+22518) |
| <i>YWHAZ</i>   | c-MAF_2455 (-155535), c-MAF_3449 (-145617), c-MAF_240 (-50746)                                                                                     |
| <i>YY2</i>     | c-MAF_5742 (+76693)                                                                                                                                |
| <i>ZAP70</i>   | c-MAF_1770 (-29), c-MAF_2625 (+136701), c-MAF_1530 (+157122)                                                                                       |
| <i>ZARI</i>    | c-MAF_5236 (+163240)                                                                                                                               |
| <i>ZBED2</i>   | c-MAF_2852 (-21095), c-MAF_730 (+9)                                                                                                                |
| <i>ZBED4</i>   | c-MAF_5189 (-23323), c-MAF_283 (-14630), c-MAF_4633 (+14336)                                                                                       |
| <i>ZBED5</i>   | c-MAF_2748 (-41801), c-MAF_4021 (-9185)                                                                                                            |
| <i>ZBTB10</i>  | c-MAF_2706 (-108022)                                                                                                                               |
| <i>ZBTB14</i>  | c-MAF_5128 (-648), c-MAF_1519 (+1166)                                                                                                              |
| <i>ZBTB16</i>  | c-MAF_2326 (+800), c-MAF_46 (+6617), c-MAF_220 (+13870)                                                                                            |
| <i>ZBTB17</i>  | c-MAF_4159 (+1046), c-MAF_952 (+10640), c-MAF_648 (+26687), c-MAF_5960 (+125979)                                                                   |
| <i>ZBTB2</i>   | c-MAF_4842 (+17880)                                                                                                                                |
| <i>ZBTB20</i>  | c-MAF_1759 (-29001), c-MAF_5039 (+50459)                                                                                                           |
| <i>ZBTB21</i>  | c-MAF_2306 (+7749)                                                                                                                                 |
| <i>ZBTB24</i>  | c-MAF_1148 (-8395)                                                                                                                                 |
| <i>ZBTB25</i>  | c-MAF_3392 (-17949)                                                                                                                                |
| <i>ZBTB33</i>  | c-MAF_2074 (+51800)                                                                                                                                |
| <i>ZBTB37</i>  | c-MAF_4643 (-2217)                                                                                                                                 |
| <i>ZBTB38</i>  | c-MAF_976 (-2040)                                                                                                                                  |
| <i>ZBTB4</i>   | c-MAF_3302 (-188)                                                                                                                                  |
| <i>ZBTB43</i>  | c-MAF_383 (-16323)                                                                                                                                 |
| <i>ZBTB44</i>  | c-MAF_5031 (+151847)                                                                                                                               |
| <i>ZBTB7A</i>  | c-MAF_5117 (-38106)                                                                                                                                |
| <i>ZBTB9</i>   | c-MAF_6610 (-24673), c-MAF_1484 (+116444)                                                                                                          |
| <i>ZC2HC1A</i> | c-MAF_1655 (-140026)                                                                                                                               |
| <i>ZC3H12C</i> | c-MAF_4778 (-122683), c-MAF_549 (-15390), c-MAF_909 (-11719), c-MAF_1620 (-2701)                                                                   |
| <i>ZC3H12D</i> | c-MAF_478 (-23709), c-MAF_1512 (-15215), c-MAF_2900 (+13086), c-MAF_4597 (+61249)                                                                  |
| <i>ZC3H14</i>  | c-MAF_5159 (+43011)                                                                                                                                |
| <i>ZC3H15</i>  | c-MAF_3844 (+89418)                                                                                                                                |
| <i>ZC3H18</i>  | c-MAF_2322 (+21452), c-MAF_6643 (+26313), c-MAF_3100 (+49705)                                                                                      |
| <i>ZC3H3</i>   | c-MAF_29 (-5898), c-MAF_3128 (+79496)                                                                                                              |
| <i>ZC3H7A</i>  | c-MAF_5406 (-15037), c-MAF_456 (+33994)                                                                                                            |
| <i>ZC3H8</i>   | c-MAF_1760 (+66839)                                                                                                                                |
| <i>ZCCHC13</i> | c-MAF_2004 (-12020)                                                                                                                                |
| <i>ZCCHC14</i> | c-MAF_5095 (+34194)                                                                                                                                |
| <i>ZCCHC2</i>  | c-MAF_6177 (-175646), c-MAF_3155 (-102688)                                                                                                         |
| <i>ZCCHC5</i>  | c-MAF_4815 (+8087), c-MAF_1764 (+142003), c-MAF_1268 (+144122)                                                                                     |
| <i>ZCCHC6</i>  | c-MAF_1185 (-51686), c-MAF_3379 (+1794)                                                                                                            |

|            |                                                                                                                                                                                                                  |
|------------|------------------------------------------------------------------------------------------------------------------------------------------------------------------------------------------------------------------|
| ZCCHC7     | c-MAF_1304 (+36570)                                                                                                                                                                                              |
| ZCRB1      | c-MAF_2508 (+26013)                                                                                                                                                                                              |
| ZCWPW1     | c-MAF_4274 (-392)                                                                                                                                                                                                |
| ZDHHC14    | c-MAF_4098 (+155030)                                                                                                                                                                                             |
| ZDHHC16    | c-MAF_1657 (-1709)                                                                                                                                                                                               |
| ZDHHC17    | c-MAF_6369 (-174476)                                                                                                                                                                                             |
| ZDHHC18    | c-MAF_1094 (-36112), c-MAF_1066 (-14793)                                                                                                                                                                         |
| ZDHHC19    | c-MAF_3168 (+31606), c-MAF_4667 (+117698)                                                                                                                                                                        |
| ZDHHC20    | c-MAF_5170 (+23195), c-MAF_2794 (+38370), c-MAF_1661 (+56289)                                                                                                                                                    |
| ZDHHC22    | c-MAF_5711 (+100885)                                                                                                                                                                                             |
| ZDHHC5     | c-MAF_4251 (-256)                                                                                                                                                                                                |
| ZDHHC7     | c-MAF_4696 (-44190), c-MAF_2530 (+113316)                                                                                                                                                                        |
| ZDHHC9     | c-MAF_3784 (+62268)                                                                                                                                                                                              |
| ZEB1       | c-MAF_6115 (-76101)                                                                                                                                                                                              |
| ZEB2       | c-MAF_11 (+68756), c-MAF_812 (+96363), c-MAF_6767 (+138012), c-MAF_326 (+142991), c-MAF_181 (+146684), c-MAF_55 (+162852), c-MAF_682 (+170482), c-MAF_6732 (+179362)                                             |
| ZFAND3     | c-MAF_6768 (+84672)                                                                                                                                                                                              |
| ZFAND5     | c-MAF_2139 (-78330), c-MAF_3653 (+2494), c-MAF_4596 (+60043)                                                                                                                                                     |
| ZFAND6     | c-MAF_4508 (-48307), c-MAF_5116 (-25861)                                                                                                                                                                         |
| ZFAT       | c-MAF_5465 (+64)                                                                                                                                                                                                 |
| ZFC3H1     | c-MAF_3228 (-114)                                                                                                                                                                                                |
| ZFP36      | c-MAF_485 (-5132)                                                                                                                                                                                                |
| ZFP36L1    | c-MAF_1205 (-61443), c-MAF_4807 (-22905), c-MAF_42 (+58591), c-MAF_4058 (+73290), c-MAF_5355 (+78028), c-MAF_4028 (+80968), c-MAF_2153 (+97564), c-MAF_433 (+107465), c-MAF_3192 (+110371), c-MAF_2694 (+129548) |
| ZFP64      | c-MAF_4123 (+137714), c-MAF_165 (+143845)                                                                                                                                                                        |
| ZFP91      | c-MAF_2126 (-1580)                                                                                                                                                                                               |
| ZFP91-CNTF | c-MAF_2126 (-1641)                                                                                                                                                                                               |
| ZFR        | c-MAF_160 (-98155), c-MAF_4940 (-87223), c-MAF_5496 (-18121)                                                                                                                                                     |
| ZFR2       | c-MAF_3674 (+56457), c-MAF_4704 (+62064)                                                                                                                                                                         |
| ZFX        | c-MAF_385 (+53194), c-MAF_4305 (+111660)                                                                                                                                                                         |
| ZFYVE20    | c-MAF_2812 (-100505), c-MAF_5541 (+1054)                                                                                                                                                                         |
| ZFYVE26    | c-MAF_3296 (+74600)                                                                                                                                                                                              |
| ZFYVE28    | c-MAF_353 (+5475)                                                                                                                                                                                                |
| ZFYVE9     | c-MAF_6694 (-2258)                                                                                                                                                                                               |
| ZGPAT      | c-MAF_1693 (+20679)                                                                                                                                                                                              |
| ZHX1       | c-MAF_4151 (+107367), c-MAF_1437 (+125288), c-MAF_3437 (+161639), c-MAF_4296 (+178019)                                                                                                                           |
| ZHX2       | c-MAF_2471 (+1952)                                                                                                                                                                                               |
| ZIC3       | c-MAF_6121 (-127858)                                                                                                                                                                                             |
| ZKSCAN8    | c-MAF_5373 (-4056)                                                                                                                                                                                               |
| ZMAT3      | c-MAF_5123 (+34588), c-MAF_4188 (+71948)                                                                                                                                                                         |
| ZMIZ1      | c-MAF_4043 (-77706)                                                                                                                                                                                              |
| ZMIZ2      | c-MAF_607 (-117421), c-MAF_2717 (-115181)                                                                                                                                                                        |
| ZMYM2      | c-MAF_1504 (+2104)                                                                                                                                                                                               |
| ZMYND8     | c-MAF_461 (-130761), c-MAF_2286 (-24116)                                                                                                                                                                         |
| ZNF114     | c-MAF_2283 (-14284)                                                                                                                                                                                              |

|         |                                                                                                                                |
|---------|--------------------------------------------------------------------------------------------------------------------------------|
| ZNF124  | c-MAF_721 (-40158)                                                                                                             |
| ZNF131  | c-MAF_1261 (-171624), c-MAF_1203 (-128276), c-MAF_2179 (-113496), c-MAF_2046 (-101677), c-MAF_72 (-78994), c-MAF_3791 (-56729) |
| ZNF143  | c-MAF_814 (+1115), c-MAF_6511 (+105198)                                                                                        |
| ZNF157  | c-MAF_5100 (-105712)                                                                                                           |
| ZNF16   | c-MAF_5874 (-51719)                                                                                                            |
| ZNF212  | c-MAF_343 (-36489), c-MAF_2473 (-29647)                                                                                        |
| ZNF227  | c-MAF_6755 (-118)                                                                                                              |
| ZNF250  | c-MAF_6475 (+22814)                                                                                                            |
| ZNF260  | c-MAF_5859 (+212)                                                                                                              |
| ZNF263  | c-MAF_2743 (-19208)                                                                                                            |
| ZNF267  | c-MAF_1565 (-3994), c-MAF_1442 (+3929)                                                                                         |
| ZNF280D | c-MAF_3397 (-53580), c-MAF_6163 (-33960)                                                                                       |
| ZNF281  | c-MAF_6069 (-38427), c-MAF_4113 (-35328), c-MAF_4324 (+183655)                                                                 |
| ZNF282  | c-MAF_343 (+7676), c-MAF_2473 (+14518)                                                                                         |
| ZNF292  | c-MAF_2656 (+26842)                                                                                                            |
| ZNF3    | c-MAF_360 (-2722)                                                                                                              |
| ZNF318  | c-MAF_3700 (-14425)                                                                                                            |
| ZNF319  | c-MAF_6544 (+1228)                                                                                                             |
| ZNF330  | c-MAF_3887 (+26008)                                                                                                            |
| ZNF335  | c-MAF_6415 (-495)                                                                                                              |
| ZNF33A  | c-MAF_1470 (-244)                                                                                                              |
| ZNF33B  | c-MAF_3978 (-330)                                                                                                              |
| ZNF365  | c-MAF_5673 (+10020)                                                                                                            |
| ZNF367  | c-MAF_3766 (-2318)                                                                                                             |
| ZNF385A | c-MAF_3420 (+16017)                                                                                                            |
| ZNF395  | c-MAF_4637 (-14568), c-MAF_5275 (+38027)                                                                                       |
| ZNF410  | c-MAF_1959 (-289)                                                                                                              |
| ZNF414  | c-MAF_1065 (-61604)                                                                                                            |
| ZNF438  | c-MAF_1401 (-69309), c-MAF_613 (+24125)                                                                                        |
| ZNF445  | c-MAF_4417 (+37864)                                                                                                            |
| ZNF446  | c-MAF_5720 (-169)                                                                                                              |
| ZNF449  | c-MAF_2796 (+34086)                                                                                                            |
| ZNF451  | c-MAF_2805 (+58122)                                                                                                            |
| ZNF48   | c-MAF_4650 (+4897)                                                                                                             |
| ZNF483  | c-MAF_3849 (+2283)                                                                                                             |
| ZNF487  | c-MAF_4742 (-16285)                                                                                                            |
| ZNF496  | c-MAF_2983 (-58731), c-MAF_721 (+119569)                                                                                       |
| ZNF500  | c-MAF_5019 (-1077)                                                                                                             |
| ZNF507  | c-MAF_3410 (+9921)                                                                                                             |
| ZNF511  | c-MAF_4819 (-365)                                                                                                              |
| ZNF532  | c-MAF_2859 (-174565)                                                                                                           |
| ZNF541  | c-MAF_6601 (-40311)                                                                                                            |
| ZNF546  | c-MAF_4728 (+179)                                                                                                              |
| ZNF557  | c-MAF_6507 (+128324)                                                                                                           |

|         |                                                                                                             |
|---------|-------------------------------------------------------------------------------------------------------------|
| ZNF589  | c-MAF_2048 (+27579)                                                                                         |
| ZNF592  | c-MAF_3265 (-46052)                                                                                         |
| ZNF608  | c-MAF_1039 (+95448), c-MAF_2188 (+161546)                                                                   |
| ZNF609  | c-MAF_6777 (+34551), c-MAF_6253 (+136269)                                                                   |
| ZNF623  | c-MAF_1955 (-13121)                                                                                         |
| ZNF639  | c-MAF_4889 (-7616)                                                                                          |
| ZNF644  | c-MAF_131 (-103483)                                                                                         |
| ZNF652  | c-MAF_5526 (-27543), c-MAF_4237 (+1086), c-MAF_2109 (+18886)                                                |
| ZNF684  | c-MAF_3017 (+131658)                                                                                        |
| ZNF688  | c-MAF_1405 (+5404)                                                                                          |
| ZNF692  | c-MAF_4584 (-66516)                                                                                         |
| ZNF706  | c-MAF_4488 (+697), c-MAF_3434 (+24186), c-MAF_2455 (+96769), c-MAF_3449 (+106687)                           |
| ZNF740  | c-MAF_4737 (+20023)                                                                                         |
| ZNF746  | c-MAF_3607 (-124266)                                                                                        |
| ZNF747  | c-MAF_1198 (-16616)                                                                                         |
| ZNF75D  | c-MAF_3283 (+130510)                                                                                        |
| ZNF764  | c-MAF_1198 (+6300)                                                                                          |
| ZNF770  | c-MAF_5286 (-5777)                                                                                          |
| ZNF771  | c-MAF_4650 (-6981)                                                                                          |
| ZNF777  | c-MAF_2493 (+163693)                                                                                        |
| ZNF778  | c-MAF_3214 (+98346), c-MAF_3318 (+102561), c-MAF_2165 (+108518), c-MAF_3754 (+133086), c-MAF_4747 (+147571) |
| ZNF783  | c-MAF_2493 (+35259)                                                                                         |
| ZNF786  | c-MAF_5668 (-1022)                                                                                          |
| ZNF79   | c-MAF_878 (+2501)                                                                                           |
| ZNF827  | c-MAF_2191 (+130371)                                                                                        |
| ZNF831  | c-MAF_2877 (-28981), c-MAF_760 (-26983)                                                                     |
| ZNFX1   | c-MAF_3576 (-45686), c-MAF_1792 (-815)                                                                      |
| ZNRD1   | c-MAF_2565 (-96228)                                                                                         |
| ZNRF1   | c-MAF_3632 (+13215), c-MAF_917 (+76439), c-MAF_3556 (+99558), c-MAF_2648 (+110030)                          |
| ZNRF2   | c-MAF_1389 (-45065), c-MAF_377 (+64092), c-MAF_3428 (+184086)                                               |
| ZNRF3   | c-MAF_4843 (-72532), c-MAF_1041 (-60455)                                                                    |
| ZP2     | c-MAF_5749 (+26097)                                                                                         |
| ZRSR2   | c-MAF_3083 (+26595)                                                                                         |
| ZSCAN10 | c-MAF_5994 (+15693)                                                                                         |
| ZSCAN25 | c-MAF_6467 (+6455)                                                                                          |
| ZSCAN30 | c-MAF_4989 (+260)                                                                                           |
| ZSCAN5A | c-MAF_4516 (+54056)                                                                                         |
| ZSCAN5D | c-MAF_4516 (+73923)                                                                                         |
| ZSWIM1  | c-MAF_3239 (+3939)                                                                                          |
| ZSWIM5  | c-MAF_1051 (-40322)                                                                                         |
| ZSWIM6  | c-MAF_6543 (-4122), c-MAF_358 (+76426)                                                                      |
| ZXDA    | c-MAF_2893 (-19691)                                                                                         |
| ZZEF1   | c-MAF_1731 (+41575)                                                                                         |
